# Supplementary material for: Comparative Proteomic Analysis of the Defense Response to Gibberella Stalk Rot in Maize and Reveals That ZmWRKY83 Is Involved in Plant Disease Resistance
Source: Front Plant Sci. 2021 Aug 13;12:694973. doi: 10.3389/fpls.2021.694973 (PMC8417113; doi:10.3389/fpls.2021.694973)
Supplement: Supplementary Table 1 — MS/MS spectrum database search analysis of proteins identified during F. graminearum infection at 0, 1, and 2 dpi in maize stem. [file Table_1.xlsx]

## Sheet: Sheet1
	Total spectrum	Matched spectrum	Peptides	Unique peptides
exp1	220501	45340	28269	22116
exp2	221554	43783	27523	21806
exp3	234345	46488	29594	23352
	676400	135611	85386	67274
	Total spectrum	Matched spectrum	Peptides	Unique peptides	Identified proteins	Quantifiable proteins
	676400	135611	85386	67274	8471	8044

## Sheet: Protein_quant
Protein information			0 dpi			1 dpi			2 dpi			1 dpi/0 dpi		2 dpi/0 dpi		2 dpi/1 dpi
Protein accession	Protein description	MW [kDa]	0 dpi_1	0 dpi_2	0 dpi_3	1 dpi_1	1 dpi_2	1 dpi_3	2 dpi_1	2 dpi_2	2 dpi_3	Ratio	P value	Ratio	P value	Ratio	P value
Zm00001d020182_P004	histone acetyltransferase1 cDNA, genomic and peptide sequence GN= hat1	52.734			0.732			0.98			1.034	1.339		1.413		1.055
Zm00001d002084_P004	zinc finger (ubiquitin-hydrolase) domain-containing protein	59.259			1.103			0.855			1.123	0.775		1.018		1.313
Zm00001d033275_P009	Protein kinase superfamily protein	25.953		0.448			1.116			1.108		2.491		2.473		0.993
Zm00001d043182_P002	cytidine methyl kinase1 encodes 4-(cytidine 5'-diphospho)-2-C-methyl-D-erythritol kinase [a.k.a. 4-diphosphocytidyl-2-C-methyl-D-erythritol kinase] GN= cmk1	28.246	0.727	0.382	0.524	0.733	1.025	0.894	1.269	1.449	1.197	1.624	0.071918	2.397	0.0095645	1.476	0.024563
Zm00001d010855_P009	Stress protein%3B Stress-related protein	21.507			1.207			0.859			1.058	0.712		0.877		1.232
Zm00001d048314_P003	Protein kinase 2B chloroplastic	48.035			0.722			1.095			0.983	1.517		1.361		0.898
Zm00001d026514_P002	Inositol-pentakisphosphate 2-kinase	48.952	1.135	1.232	1.256	0.87	0.904	0.889	0.961	0.913	0.993	0.735	0.00074038	0.791	0.004098	1.077	0.052322
Zm00001d051138_P002	Glycolipid transfer protein 1	22.544	0.884	1.771	1.147	0.95	1.416	0.93	1.063	1.486	1.042	0.867	0.64798	0.945	0.90692	1.09	0.63586
Zm00001d032605_P004	alpha-galactosidase1 Entrez Gene relates to alpha-galactosidase 1 (AGAL) of Arabidopsis GN= agal1	38.604	1.258	1.214	1.177	1.197	1.181	1.133	1.082	1.046	0.972	0.962	0.20404	0.85	0.0115034	0.883	0.024736
Zm00001d008996_P001	RNA polymerase I-associated factor PAF67	60.878	0.725	0.793		0.685	0.906		1.173	1.002		1.048	0.81892	1.433	0.058676	1.367	0.184916
Zm00001d030934_P004	cAMP-regulated phosphoprotein 19-related protein	7.2702		0.64			0.987			1.293		1.542		2.02		1.31
Zm00001d004270_P001	GDSL esterase/lipase	33.212	0.595	0.882		1.304	1.232		1.507	1.481		1.717	0.106541	2.023	0.066756	1.178	0.031136
Zm00001d045668_P001	acylphosphatase family	11.836			1.319			1.001			0.833	0.759		0.632		0.832
Zm00001d029833_P001	Tetratricopeptide repeat protein SKI3	107.54			0.848			0.969			1.009	1.143		1.19		1.041
Zm00001d024071_P001	Xyloglucan endotransglucosylase/hydrolase protein 2	32.194		0.358			0.692			2.777		1.933		7.757		4.013
Zm00001d021170_P009	Inositol 134-trisphosphate 5/6-kinase 4	38.846		1.396			1.205			1.107		0.863		0.793		0.919
Zm00001d041495_P004	SRP40 carboxy-terminal domain protein	57.719		0.434	0.478		1.176	1.339		1.271	1.228	2.758	0.0063154	2.74	0.0025753	0.994	0.95344
Zm00001d003119_P003	Trafficking protein particle complex II-specific subunit 120 homolog	116.98	0.552	0.906		1.162	1.028		1.096	1.053		1.502	0.23016	1.474	0.23456	0.981	0.81432
Zm00001d041070_P001	5-methylthioadenosine/S-adenosylhomocysteine deaminase	11.348
Zm00001d047217_P006	5-hydroxyisourate hydrolase	24.478	1.179	1.001		1.043	1.253		1.071	1.266		1.053	0.71854	1.072	0.61328	1.018	0.89572
Zm00001d007084_P001	Histone H2B	16.356	0.079	0.118	0.093	0.117	0.168	0.16	0.123	0.134	0.133	1.534	0.057421	1.345	0.061081	0.876	0.36046
Zm00001d041710_P005	Glutathione synthetase chloroplastic	48.654	0.987		1.002	1.088		0.949	0.877		1.001	1.024	0.78372	0.944	0.46512	0.922	0.4835
Zm00001d010534_P007	ubiquitin carrier protein 7	7.3221		1.073	1.023		0.972	0.94		0.953	1.122	0.912	0.08784	0.99	0.89162	1.085	0.44498
Zm00001d037484_P003	Putative clathrin assembly protein	61.017	0.934		1.198	1.233		1.227	0.877		0.91	1.154	0.4393	0.838	0.31144	0.726	0.0033782
Zm00001d023564_P003	Polynucleotide adenylyltransferase family protein	42.76	1.066	0.914	0.919	1.039	0.873	1.091	0.948	0.951	0.98	1.036	0.71286	0.993	0.93522	0.959	0.63642
Zm00001d020086_P001	Nudix hydrolase 20 chloroplastic	25.454	0.943			0.935			1.01			0.992		1.071		1.08
Zm00001d047566_P024	Mitochondrial import receptor subunit TOM40-1	34.179			1.402			0.855			0.9	0.61		0.642		1.053
Zm00001d026030_P016	Cyclin-T1-5	32.539			0.462			0.942			0.849	2.039		1.838		0.901
Zm00001d034635_P001	chalcone flavanone isomerase1 genomic sequence, gene-specific probe, transcript defined by S1-nuclease protection analysis GN= chi1	23.952	1.569	1.3	1.395	0.746	0.861	0.927	0.741	0.938	0.903	0.594	0.0034424	0.606	0.0052797	1.019	0.86508
Zm00001d027715_P002	Armadillo/beta-catenin repeat family protein / kinesin motor family protein	101.3		0.252			1.033			1.491		4.099		5.917		1.443
Zm00001d020975_P009	methyl binding domain108 GN= mbd108	26.993			1.344			0.874			1.237	0.65		0.92		1.415
Zm00001d050964_P001	uncharacterized protein	22.692
Zm00001d018470_P001	Carboxyl-terminal-processing peptidase 2 chloroplastic	57.836			0.619			0.842			0.935	1.36		1.511		1.11
Zm00001d025453_P005	Protein TIC 40 chloroplastic	36.003	0.924	0.783	0.895	0.896	0.978	0.959	0.787	0.631	0.987	1.089	0.20362	0.924	0.54014	0.849	0.24454
Zm00001d049409_P010	aconitase1 electrophoretic mobility GN= aco1	98.406		1.123			0.945			1.023		0.841		0.911		1.083
Zm00001d012741_P003	uncharacterized protein	8.3956	0.952	1.028	1.02	0.919	0.968	1.077	1.167	1.202	1.101	0.988	0.80796	1.157	0.0148807	1.171	0.040598
Zm00001d029706_P002	glutathione transferase39 GN= gst39	12.45		0.286	0.363		0.288	0.374		0.341	0.38	1.02	0.92658	1.111	0.4864	1.089	0.58054
Zm00001d025517_P002	Small nuclear ribonucleoprotein LSM1	11.818	1.311	1.415	1.377	0.959	1.089	1.124	0.922	0.908	1.035	0.773	0.0083217	0.698	0.00155602	0.903	0.187477
Zm00001d018036_P002	Arsenical pump-driving ATPase	42.915	0.917	1.026		0.961	0.831		0.924	0.841		0.922	0.46632	0.908	0.32186	0.985	0.8892
Zm00001d019363_P001	Serine/threonine protein phosphatase 2A 59 kDa regulatory subunit B' eta isoform	62.039
Zm00001d041833_P007	tRNA pseudouridine synthase	24.588		0.361	0.358		1.028	1.121		1.265	1.318	2.989	0.00157883	3.592	0.00026406	1.202	0.061216
Zm00001d007810_P003	40S ribosomal protein S15-4	13.362	0.199	0.136	0.215	1.195	1.198	1.155	1.202	1.15	1.24	6.451	0.0056402	6.531	0.0056613	1.012	0.6546
Zm00001d007121_P053	CW-type Zinc Finger	70.123		1.013			1.177			0.992		1.162		0.979		0.843
Zm00001d008654_P061	Bromodomain GN=WD40/YVTN repeat-like-containing domain	71.46	0.427			0.425			0.497			0.995		1.164		1.169
Zm00001d005504_P001	Ras-related protein RABA4c	25.044	1.069		0.474	1.012		1.193	1.207		1.896	1.429	0.40522	2.011	0.24652	1.407	0.3148
Zm00001d032483_P001	HR-like lesion-inducing protein-related	13.462	1.237	1.184	1.188	1.023	0.981	0.842	1.16	1.379	1.214	0.789	0.0166981	1.04	0.53232	1.319	0.024263
Zm00001d029084_P001	Fumarate hydratase 1 mitochondrial	53.584	1.15	1.242	1.153	0.982	0.959	0.944	0.986	0.961	0.921	0.814	0.00176269	0.809	0.0027437	0.994	0.80132
Zm00001d048561_P001	p-protein	41.191	0.83	0.943	0.874	0.862	0.829	0.83	0.959	1.023	1.01	0.952	0.29204	1.13	0.042375	1.187	0.00190302
Zm00001d007153_P002	Hypoxia-responsive family protein	7.0853	0.843			0.842			0.657			0.999		0.779		0.78
Zm00001d011658_P001	uncharacterized protein	28.521	0.656	0.818		1.186	1.134		1.102	0.951		1.574	0.055157	1.393	0.127743	0.885	0.24678
Zm00001d014246_P008	NagB/RpiA/CoA transferase-like superfamily protein	38.59	1.124	0.659	0.635	1.092	1.657	1.669	0.428	1.055	0.994	1.827	0.055517	1.024	0.96606	0.561	0.120782
Zm00001d027769_P002	Glutathione reductase chloroplastic	59.19	1.084	1.052	0.991	0.911	0.897	0.958	0.886	0.859	0.833	0.885	0.020699	0.824	0.0037557	0.932	0.057823
Zm00001d033657_P015	Histone acetyltransferase type B catalytic subunit	29.938		0.604			0.888			1.174		1.47		1.944		1.322
Zm00001d018758_P003	succinate dehydrogenase1 GN= sudh1	67.969	1.386	1.478	1.142	0.872	1.106	1.304	0.889	0.592	1.313	0.819	0.214	0.697	0.169237	0.851	0.4822
Zm00001d018565_P003	tie-dyed2 leaves yellow in patches simulating tie-dyed or zebra patterns GN= tdy2	74.844			1.454			1.016			0.884	0.699		0.608		0.87
Zm00001d006176_P003	Plant UBX domain-containing protein 8	57.17	0.914			0.995			1.113			1.089		1.218		1.119
Zm00001d036546_P008	Auxin-independent growth promoter-like protein%2C mRNA	23.214
Zm00001d051998_P003	AP-1 complex subunit gamma-1	98.459	0.713			1.054			1.129			1.478		1.583		1.071
Zm00001d021170_P002	Inositol 134-trisphosphate 5/6-kinase 4	41.384	1.619			1.294			1.312			0.799		0.81		1.014
Zm00001d034373_P001	Has 1807 Blast hits to 1807 proteins in 277 species Archae - 0 GN=BEST Arabidopsis thaliana protein match is: FASCICLIN-like arabinogalactan protein 17 precursor (TAIR:AT5G06390.1)	50.042	0.956		0.973	0.764		1.121	0.901		1.007	0.977	0.84956	0.989	0.8455	1.012	0.89834
Zm00001d011525_P003	Mitogen-activated protein kinase 20	62.842	0.606			1.092			0.984			1.802		1.624		0.901
Zm00001d042216_P001	Glutathione S-transferase 3	23.894	1.043	1.092	1.142	1.022	1.015	1.039	1.372	1.35	1.305	0.939	0.081682	1.229	0.002343	1.309	7.9351e-05
Zm00001d017607_P002	Pentatricopeptide (PPR) repeat-containing protein-like GN= protein	47.597	0.852			0.866			1.067			1.016		1.252		1.232
Zm00001d008395_P001	3-beta-hydroxysteroid-delta-isomerase	24.973	1.061	1.073	1.203	0.774	0.74	0.72	1.033	1.141	1.134	0.669	0.00090457	0.991	0.88218	1.481	0.0005211
Zm00001d034528_P001	cytochrome c reductase1 single copy leaf cDNA csu576 GN= ccr1	14.685	1.301	1.234	1.246	0.922	1.065	1.017	1.159	1.138	1.217	0.794	0.007041	0.929	0.046664	1.17	0.028142
Zm00001d029505_P001	Nuclear transcription factor Y subunit B-2	23.565		0.916			1.251			1.073		1.366		1.171		0.858
Zm00001d053245_P005	Polyadenylate-binding protein-interacting protein 3	49.711	0.697	0.584		1.104	1.025		0.99	0.981		1.662	0.033443	1.539	0.039076	0.926	0.177717
Zm00001d012511_P002	Protein kinase family protein with ARM repeat domain	89.433	1.017	0.964		0.959	1.033		1.077	1.016		1.006	0.9199	1.057	0.29952	1.051	0.4029
Zm00001d015329_P005	FAD/NAD(P)-binding oxidoreductase family protein	59.171	1.188	1.269	1.156	0.974	0.91	0.814	0.665	0.88	0.793	0.747	0.0076632	0.647	0.0069367	0.867	0.2042
Zm00001d050179_P002	Pollen Ole e 1 allergen and extensin family protein	13.972
Zm00001d007718_P005	benzoxazinone synthesis13 encodes a 2-oxoglutarate-dependent dioxygenase that catalyzes the conversion of DIMBOA-Glc into a new benzoxazinoid intermediate (TRIMBOA-Glc) by an uncommon reaction involving a hydroxylation and a likely ortho-rearrangement of a methoxy group. GN= bx13	42.454	0.505	0.284	0.258	0.407	0.322	0.324	0.52	0.463	0.622	1.006	0.84734	1.533	0.108884	1.524	0.021941
Zm00001d024938_P004	Peptidase S24/S26A/S26B/S26C family protein	10.24	0.861			1.073			0.993			1.246		1.153		0.925
Zm00001d015985_P005	Probable tocopherol cyclase%2C chloroplastic	52.636	0.853			0.694			0.724			0.814		0.849		1.043
Zm00001d046488_P002	Leucine-rich repeat protein kinase family protein	49.675	1.038			1.132			0.882			1.091		0.85		0.779
Zm00001d052885_P003	40S ribosomal protein S15a-1	13.408		0.785			1.064			1.019		1.355		1.298		0.958
Zm00001d011532_P001	Protein VACUOLELESS1	91.884	1.091	0.81		0.951	0.997		0.966	1.079		1.025	0.83716	1.076	0.65514	1.05	0.51364
Zm00001d041711_P005	resistance to sugarcane mosaic virus2 dominant Scmv1 and Scmv2 confer resistance GN= scmv2	16.806	1.183	1.279	1.197	0.856	0.779	0.825	0.904	0.838	0.979	0.672	0.00041528	0.744	0.0043159	1.106	0.131356
Zm00001d031611_P004	ribosomal protein L17c GN= rpl17c	18.732		0.525			1.296			1.192		2.469		2.27		0.92
Zm00001d044920_P002	NAD(P)H dehydrogenase C1	31.011	1.115	1.157	1.333	1.04	1.345	1.037	1.067	1.152	1.18	0.949	0.6076	0.943	0.41396	0.993	0.99978
Zm00001d046539_P002	26S protease regulatory subunit S10B homolog B	44.514			1.222			0.904			0.904	0.74		0.74		1
Zm00001d027369_P003	Protein-ribulosamine 3-kinase chloroplastic	11.344			1.07			1.081			1.049	1.01		0.98		0.97
Zm00001d008271_P001	Hydroxymethylglutaryl-CoA lyase mitochondrial	42.813	0.946	1.098	0.85	0.833	0.764	0.969	0.935	0.918	0.994	0.887	0.30458	0.984	0.89078	1.11	0.21498
Zm00001d015331_P001	early nodulin-like protein 9	24.988	1.53	1.334	1.163	0.784	0.907	1.06	0.87	0.987	1.047	0.683	0.031404	0.721	0.028183	1.056	0.59818
Zm00001d047472_P004	homolog of nucleolar protein NOP56	60.342		0.78			1.198			1.246		1.536		1.597		1.04
Zm00001d036237_P002	GDSL esterase/lipase	39.014		1.05	0.528		0.765	0.794		1.007	1.361	0.988	0.90662	1.501	0.35118	1.519	0.115519
Zm00001d005902_P002	Sec23/Sec24 protein transport family protein	84.434	1.022	1.07	0.983	0.783	0.825	0.885	0.994	1.01	0.992	0.811	0.0081563	0.974	0.36884	1.202	0.0067432
Zm00001d006834_P003	uncharacterized protein	18.351	1.208	1.206		0.558	0.962		0.709	0.558		0.63	0.31792	0.525	0.115677	0.834	0.65906
Zm00001d021469_P001	Glutathione S-transferase F9	299.64	1.25	1.115	1.406	1.146	1.138	1.101	0.782	0.861	0.727	0.898	0.20248	0.628	0.0050787	0.7	0.0020791
Zm00001d047758_P007	MAP kinase1 cDNA sequence GN= mpk1	43.293			0.843			0.916			1.081	1.087		1.282		1.18
Zm00001d037492_P001	Pyrophosphate-energized vacuolar membrane proton pump 1	79.664	1.133	0.926	1.139	0.975	0.915	1.049	0.947	1.034	1.066	0.919	0.35932	0.953	0.58888	1.037	0.53058
Zm00001d045500_P004	ribosomal protein L29 family protein	16.118	0.905	0.956	0.807	1.023	0.879	0.969	0.999	0.925	1.016	1.076	0.33096	1.102	0.162084	1.024	0.66296
Zm00001d052797_P002	Phospho-2-dehydro-3-deoxyheptonate aldolase 2 chloroplastic	55.73	0.755			0.791			0.852			1.048		1.128		1.077
Zm00001d045076_P009	Serine/arginine-rich splicing factor RSZ22	20.946			0.786			1.026			1.12	1.305		1.425		1.092
Zm00001d045027_P001	3-oxoacyl-[acyl-carrier-protein] synthase I chloroplastic	51.24	1.216	0.759	1.2	0.824	0.884	0.809	1.055	1.616	0.946	0.793	0.25212	1.139	0.6076	1.437	0.112638
Zm00001d018961_P005	Pyruvate kinase	55.965	0.828	0.829		0.917	0.935		1.003	1.006		1.118	0.0075804	1.212	6.4952e-05	1.085	0.0142781
Zm00001d000178_P001	Autophagy-related protein 3	38.428	0.915	1.013	0.983	1.011	1.123	1.067	1.035	1.032	1.177	1.1	0.090703	1.114	0.112001	1.013	0.82678
Zm00001d029968_P001	Nucleoside diphosphate kinase family protein	16.541	0.865	0.877	0.903	1.007	0.934	0.887	1.152	1.103	1.102	1.069	0.167016	1.269	0.00025524	1.187	0.0121172
Zm00001d005193_P001	Protein LURP1	22.784	0.956	0.912	0.961	0.949	0.862	0.868	0.736	0.815	0.653	0.947	0.191584	0.779	0.0186152	0.823	0.049437
Zm00001d034724_P001	50S ribosomal protein L18 chloroplastic	18.66	0.76	0.795	0.797	0.9	1.04	0.909	0.829	0.835	0.881	1.211	0.0181002	1.082	0.03302	0.893	0.092484
Zm00001d042416_P002	DEAD box RNA helicase1 protein is part of a ribonucleoprotein complex in rRNA metabolism - mRNA yeast two-hybrid screening showed interaction of protein with MA16 nucleolar protein GN= drh1	69.812			0.904			1.085			1.09	1.2		1.206		1.005
Zm00001d016898_P001	Transposon protein Mutator sub-class	80.015			1.33			1.084			1.064	0.815		0.8		0.982
Zm00001d002323_P020	Trypsin family protein	42.957		1.539			1.028			0.778		0.668		0.506		0.757
Zm00001d031747_P001	Eukaryotic translation initiation factor 6	26.514	1.015	0.996	0.975	0.931	0.905	1.03	1.056	0.954	1.003	0.96	0.35854	1.009	0.80596	1.051	0.3592
Zm00001d015168_P001	Aspartate--tRNA ligase 2 cytoplasmic	60.796	1.068	1.162	1.094	1.011	0.975	0.954	0.937	0.956	0.959	0.884	0.0155413	0.858	0.004282	0.97	0.176976
Zm00001d015851_P003	Tubulin binding cofactor C domain-containing protein	63.244	0.854		1.013	1.312		0.897	0.65		0.999	1.183	0.5372	0.883	0.5983	0.746	0.40896
Zm00001d048324_P002	Ribulose-phosphate 3-epimerase	29.003	1.011			1.089			1.046			1.077		1.035		0.961
Zm00001d049208_P024	Protein transport protein Sec24-like CEF	89.186	0.943	0.912	1.082	0.948	0.965	1.116	1.079	0.918	0.977	1.031	0.69584	1.013	0.8617	0.982	0.81112
Zm00001d011405_P003	ATP binding microtubule motor family protein	64.346	1.077	1.116	1.117	1.043	0.936	1.174	0.981	0.976	0.779	0.953	0.47228	0.827	0.125818	0.868	0.22652
Zm00001d003352_P002	Per1-like family protein	37.085		0.514	0.568		0.916	0.875		1.232	1.095	1.655	0.0116374	2.151	0.0100395	1.299	0.054241
Zm00001d037775_P003	Probable lactoylglutathione lyase chloroplastic	34.984	0.967			0.857			0.748			0.886		0.774		0.873
Zm00001d053756_P001	SBP-domain protein2 cDNA sequence GN= sbp2	42.601
Zm00001d053636_P002	40S ribosomal protein S8	25.056	1.067	1.144	0.932	1.04	0.992	1.05	0.914	0.934	1.171	0.981	0.80734	0.961	0.68718	0.98	0.75802
Zm00001d044339_P002	aldehyde dehydrogenase3 cDNA sequence similar to rf2 GN= aldh3	54.032	0.914		1.093	0.973		1.032	1.294		1.254	0.999	0.98076	1.27	0.116215	1.271	0.0187813
Zm00001d007896_P001	O-Glycosyl hydrolases family 17 protein	51.461	1.053	1.317	1.423	1.229	1.232	1.391	1.088	1.212	1.117	1.016	0.8374	0.901	0.36702	0.887	0.084519
Zm00001d054106_P011	protein disulfide isomerase3 GN= pdi3	50.962	0.841	0.859	0.768	1.116	1.081	1.07	1.271	1.373	1.498	1.324	0.00153967	1.678	0.00091618	1.268	0.0087233
Zm00001d017476_P001	Chaperone protein dnaJ 3	47.075			0.616			0.994			1.075	1.614		1.745		1.081
Zm00001d051337_P004	Ubiquitin carboxyl-terminal hydrolase 3	24.988	0.808	1.202	0.862	1.107	1.136	1.15	1.001	0.957	1.051	1.181	0.27822	1.048	0.65098	0.887	0.0146014
Zm00001d039745_P003	Protein phosphatase 2C	22.795	1.035			1.049			0.866			1.014		0.837		0.826
Zm00001d034894_P001	ATP-dependent DNA helicase 2 subunit KU80	76.587	0.956	1.112	0.621	0.917	0.742	1.008	0.98	1.067	1.301	0.992	0.9515	1.245	0.28128	1.255	0.138201
Zm00001d027671_P001	Methyltransferase-like protein 1	91.28	0.736	0.72	0.75	1.135	1.16	1.08	1.081	0.95	1.197	1.53	6.096e-05	1.463	0.0051805	0.956	0.527
Zm00001d014626_P002	Ribosomal RNA processing Brix domain protein	33.898			0.792			1.156			1.05	1.46		1.326		0.908
Zm00001d026122_P001	Syntaxin-81	17.089	0.739			1.093			1.156			1.479		1.564		1.058
Zm00001d010375_P001	ATP-dependent 6-phosphofructokinase 4 chloroplastic	58.039
Zm00001d002395_P002	60S ribosomal protein L7-2	28.485	0.584	0.609	0.476	1.202	1.252	1.024	1.136	1.023	1.503	2.084	0.00166267	2.194	0.004842	1.053	0.76448
Zm00001d031323_P002	COP9 signalosome complex subunit 6a	31.134	1.116			0.619			1.125			0.555		1.008		1.817
Zm00001d012033_P014	stearoyl-acyl-carrier-protein desaturase2 encodes Stearoyl-acyl carrier protein desaturase GN= sacd2	38.072		0.823			0.847			0.912		1.029		1.108		1.077
Zm00001d007039_P001	SWI/SNF complex component SNF12 homolog	58.327			1.062			0.985			0.945	0.927		0.89		0.959
Zm00001d039182_P002	uncharacterized protein	35.349	0.961	0.952	0.984	0.983	0.925	0.991	0.946	1.185	1.127	1.001	0.99002	1.125	0.24316	1.124	0.191042
Zm00001d038805_P020	Probable transcriptional regulatory protein	15.856		0.954			1.16			1.094		1.216		1.147		0.943
Zm00001d003254_P001	Plant UBX domain-containing protein 1	20.418			1.179			0.761			1.069	0.645		0.907		1.405
Zm00001d018794_P004	Ferredoxin--NADP reductase	42.123	0.929	0.864	0.921	0.836	0.813	0.88	0.883	0.903	0.88	0.932	0.096021	0.982	0.51316	1.054	0.096119
Zm00001d043018_P001	PRA1 family protein B4	22.949	0.869	0.963	1.011	0.901	0.868	1.175	1.14	1.089	1.034	1.036	0.8065	1.148	0.057982	1.108	0.32512
Zm00001d022316_P001	Proteasome subunit alpha type	29.955	1.689	1.667	1.931	1.304	1.227	1.563	1.32	1.225	1.551	0.774	0.040298	0.775	0.037263	1	0.9929
Zm00001d044648_P006	Alpha-L-arabinofuranosidase 1	72.199	1.338	1.276	1.172	0.983	0.988	1	1.039	1.11	1.048	0.785	0.025317	0.844	0.0187238	1.076	0.026944
Zm00001d049325_P003	Iron-sulfur assembly protein IscA-like 2 mitochondrial	17.114	0.893	1.066		0.788	0.833		0.907	0.869		0.827	0.1831	0.907	0.40898	1.096	0.120821
Zm00001d044139_P001	uncharacterized protein	119.58		1.009	0.928		0.925	1.271		0.817	0.713	1.134	0.56014	0.79	0.097141	0.697	0.179316
Zm00001d024231_P001	NAD(P)-binding Rossmann-fold superfamily protein	35.102	1.65	1.311	1.037	1.777	1.707	1.078	1.138	1.434	1.037	1.141	0.5802	0.903	0.59982	0.791	0.3056
Zm00001d017566_P001	N6-adenosine-methyltransferase MT-A70-like protein	77.861	0.654			1.082			1.088			1.654		1.664		1.006
Zm00001d012800_P001	RNA-binding ASCH domain protein	34.583			0.905			0.967			0.92	1.069		1.017		0.951
Zm00001d033233_P001	Metallo-hydrolase/oxidoreductase superfamily protein	12.102			0.889			1.065			1.022	1.198		1.15		0.96
Zm00001d023990_P001	Putative alcohol dehydrogenase superfamily protein	38.273		0.77	0.815		0.552	0.759		0.542	0.594	0.827	0.33802	0.717	0.025102	0.867	0.51002
Zm00001d007153_P001	Hypoxia-responsive family protein	11.122		0.682			1.024			1.19		1.501		1.745		1.162
Zm00001d029457_P001	nucleoredoxin1 single copy cDNA sequence GN= nrx1	63.328	0.523	0.505	0.537	0.579	0.563	0.595	0.627	0.672	0.565	1.11	0.0120171	1.191	0.031981	1.073	0.266
Zm00001d041948_P004	SAND family protein	56.242		0.915			1.057			1.074		1.155		1.174		1.016
Zm00001d034343_P002	Histidinol dehydrogenase chloroplastic	26.145		1.151			0.932			1.261		0.81		1.096		1.353
Zm00001d011661_P001	GDSL esterase/lipase APG	38.061
Zm00001d039059_P001	Protease Do-like 1 chloroplastic	49.81
Zm00001d049360_P002	evolutionarily conserved C-terminal region 10	62.211		0.857	1.204		1.055	1.08		1.087	1.097	1.036	0.79844	1.06	0.74396	1.023	0.21212
Zm00001d020908_P005	ATP phosphoribosyltransferase 2 chloroplastic	29.599	1.017		1	0.936		0.884	0.997		1.03	0.902	0.074264	1.005	0.81618	1.114	0.081575
Zm00001d007192_P002	T-complex protein 1 subunit zeta	59.086	0.996	1.05	1.016	0.896	0.915	0.932	0.956	1.039	0.935	0.896	0.0045608	0.957	0.27608	1.068	0.128796
Zm00001d010530_P001	Cysteine--tRNA ligase 1 cytoplasmic	63.148	1.154	1.183	1.202	1.082	1.136	1.017	0.919	1.095	0.945	0.914	0.056615	0.836	0.030825	0.915	0.222
Zm00001d027648_P001	Tankyrase 1	22.088	0.458	0.689	0.851	1.225	1.106	1.07	1.208	1.125	1.092	1.702	0.039317	1.714	0.036501	1.007	0.88478
Zm00001d017522_P012	Tripeptidyl-peptidase 2	142.64		1.181	1.189		1.133	1.159		1.111	1.089	0.967	0.105321	0.928	0.0194992	0.96	0.113597
Zm00001d009888_P001	DNA primase	47.8		0.478	0.565		1.359	1.112		1.188	1.332	2.369	0.022237	2.416	0.0128796	1.02	0.8604
Zm00001d047912_P003	Translation initiation factor IF-2	12.932	0.639			1.788			1.664			2.798		2.604		0.931
Zm00001d037265_P002	O-fucosyltransferase family protein	34.016		1.501			1.184			1.027		0.789		0.684		0.867
Zm00001d048524_P005	N-terminal amidase1 NCBI CemA-like proton extrusion protein-related GN= nta1	27.247	1.174	1.093	1.037	0.86	0.946	1.344	1.066	1.118	0.902	0.953	0.66542	0.934	0.39304	0.98	0.97178
Zm00001d035610_P001	Preprotein translocase Sec Sec61-beta subunit protein	10.673	0.791	0.876	0.82	1.095	0.954	1.027	1.105	1.126	0.993	1.237	0.0131028	1.296	0.0062618	1.048	0.44678
Zm00001d004543_P003	Rhomboid-like protein 19	26.085	1.001	1.061	1.133	1.232	1.111	1.116	1.147	1.334	1.086	1.083	0.181161	1.116	0.2051	1.031	0.7096
Zm00001d039370_P004	Isoamyl acetate-hydrolyzing esterase	26.587	0.814	0.857	0.821	0.697	0.783	0.757	0.801	0.706	0.811	0.898	0.045861	0.93	0.190742	1.036	0.56894
Zm00001d039162_P004	Putative casein kinase family protein	53.74	1.05	1.029	1.006	0.911	0.922	1.013	0.882	0.838	0.922	0.923	0.084559	0.856	0.006762	0.928	0.163737
Zm00001d013139_P001	Tubulin beta-4 chain	32.697	0.824	0.883	1.01	1.521	1.571	1.427	1.161	1.087	0.981	1.663	0.00150029	1.188	0.087681	0.715	0.0039575
Zm00001d021138_P002	FAD-dependent oxidoreductase family protein	51.919	0.846		0.738	0.953		0.901	1.024		1.074	1.17	0.163581	1.324	0.059518	1.132	0.078257
Zm00001d004960_P006	2-isopropylmalate synthase 1 chloroplastic	68.49	1.034	0.988	1.016	0.972	0.976	1	0.921	0.981	0.99	0.97	0.133204	0.952	0.132396	0.981	0.46624
Zm00001d040163_P002	deoxy xylulose reductoisomerase1 enzyme catalyzes the first committed step of the plastidial pathway to apocarotenoids during mycorrhizal establishment GN= dxr1	51.256	0.556	0.42	0.541	0.755	0.735	0.666	1.331	1.343	1.235	1.421	0.021104	2.577	0.0005168	1.813	0.00021676
Zm00001d009296_P001	Pathogenesis-related protein PRMS	18.448	0.514	0.268	0.4	0.514	0.263	0.597	0.85	0.684	0.809	1.162	0.70736	1.982	0.023562	1.705	0.087084
Zm00001d016199_P001	FAD-binding Berberine family protein	60.895	0.988	1.017	1.003	1.111	0.969	0.996	1.009	0.998	0.981	1.023	0.65298	0.993	0.59916	0.971	0.55574
Zm00001d013442_P074	Phosphatidylinositol 4-kinase alpha 1	204.84	1.204		0.908	0.972		0.995	1.027		1.258	0.931	0.70734	1.082	0.67822	1.162	0.29196
Zm00001d028655_P002	THO complex subunit 4B	26.553	1.006	0.812	0.734	1.024	1.061	1.114	1.023	0.958	0.918	1.254	0.071464	1.136	0.24014	0.906	0.068145
Zm00001d022386_P001	Ribosomal protein S5 domain 2-like superfamily protein	45.377	1.049	0.843	1.154	1.107	1.148	1.077	1.015	1.204	0.866	1.094	0.36014	1.013	0.93174	0.926	0.4264
Zm00001d002824_P002	Vacuolar processing enzyme%2C beta-isozyme	48.431	1.26	1.146	0.988	1.132	1.045	1.201	1.135	1.346	1.187	0.995	0.98724	1.081	0.41128	1.086	0.27918
Zm00001d005394_P001	Fiber protein Fb34	19.524	1.398	2.029	0.954	1.179	0.639	0.399	0.742	0.593	0.639	0.506	0.127557	0.451	0.029481	0.89	0.94792
Zm00001d002085_P001	Glycerol kinase	56.475	1.002	0.698	0.935	0.962	0.989	0.774	0.694	0.734	0.642	1.034	0.78426	0.786	0.120519	0.76	0.035484
Zm00001d029074_P003	lesion22 (was Les*-J2552, les29) dominant leaf lesions,early-medium timing, small size, white color GN= les22	43.496	0.767		1.004	0.923		0.883	0.92		0.905	1.02	0.85458	1.03	0.7995	1.011	0.69562
Zm00001d039173_P007	hypersensitive induced reaction3 cDNA, up-regulated in Les9 GN= hir3	31.554	1.035	0.997	0.855	0.739	0.842	0.661	0.916	0.672	0.976	0.777	0.049264	0.888	0.37782	1.144	0.40198
Zm00001d048442_P021	Ubiquitin carboxyl-terminal hydrolase-related protein	114.89		0.762			1.082			0.986		1.42		1.294		0.911
Zm00001d022502_P011	Exocyst complex component SEC8	116.64	0.907			1.05			1.173			1.158		1.293		1.117
Zm00001d023994_P002	Beta-glucosidase%2C chloroplastic	64.237	1.423	1.491	1.487	0.997	0.943	0.945	1.619	1.55	1.562	0.656	5.9033e-05	1.075	0.023221	1.64	2.2942e-05
Zm00001d016626_P001	Probable L-gulonolactone oxidase 6	32.502			0.43			1.05			1.223	2.442		2.844		1.165
Zm00001d026350_P001	Pentatricopeptide repeat-containing protein	97.895	0.849			1.131			0.962			1.332		1.133		0.851
Zm00001d047938_P001	Pathogenesis-related thaumatin superfamily protein	31.837		0.436			1.182			1.068		2.711		2.45		0.904
Zm00001d042590_P001	KH domain-containing protein /At1g09670	32.879			0.795			1.171			0.905	1.473		1.138		0.773
Zm00001d032035_P001	cytochrome P450 family 706 subfamily A polypeptide 5	56.552	1.227	1.343	1.142	1.334	1.098	1.022	0.982	0.955	0.933	0.93	0.45542	0.773	0.0065596	0.831	0.09152
Zm00001d039091_P001	GTP-binding nuclear protein Ran-2	25.06	1.104	1.113	1.04	0.897	1.111	0.84	1.177	0.977	1.047	0.874	0.180723	0.983	0.7509	1.124	0.29408
Zm00001d023223_P001	Ferritin-2 chloroplastic	27.761	1.345	1.109	0.777	0.999	0.924	1.195	1.108	1.033	0.965	0.965	0.93062	0.961	0.92746	0.996	0.99624
Zm00001d008408_P001	uncharacterized protein	36.113	1.424	1.468	1.483	1.063	1.142	1.103	0.928	1.072	0.937	0.756	0.00031523	0.671	0.00113932	0.888	0.076863
Zm00001d025340_P004	Calcineurin-like metallo-phosphoesterase superfamily protein	35.064
Zm00001d025020_P003	HR-like lesion-inducing protein-related	17.048	1.087			1.184			1.146			1.089		1.054		0.968
Zm00001d043465_P011	50S ribosomal protein L13 chloroplastic	18.996	0.999	0.883	0.741	0.941	0.923	0.91	0.557	0.677	0.734	1.058	0.54334	0.75	0.074196	0.709	0.05136
Zm00001d014844_P001	14-alpha-glucan-branching enzyme 2-2 chloroplastic/amyloplastic	15.936	0.978			0.843			0.815			0.862		0.833		0.967
Zm00001d015307_P001	Protein IRX15-LIKE	34.18	1.341	1.588		1.093	1.181		0.71	0.714		0.776	0.114718	0.486	0.074682	0.626	0.0068248
Zm00001d014848_P001	Catalase isozyme 1	56.756	1.031	1.028	1.059	0.973	0.973	0.913	0.99	0.952	1.038	0.917	0.0199634	0.956	0.161779	1.042	0.27662
Zm00001d019376_P002	Aldehyde oxidase/xanthine dehydrogenase molybdopterin binding protein	147.2
Zm00001d054105_P004	Uridine kinase	52.84	1.057			1.004			1.104			0.95		1.044		1.1
Zm00001d008342_P002	Pollen-specific protein like%3B Pollen-specific protein like protein	12.948	0.813		0.704	0.732		1.075	1.004		0.908	1.191	0.51906	1.26	0.117675	1.058	0.74662
Zm00001d026505_P001	uncharacterized protein	19.446	0.448	0.667	0.867	0.616	0.887	0.963	0.832	1.235	1.201	1.244	0.37356	1.649	0.086742	1.325	0.20368
Zm00001d002848_P001	(+)-neomenthol dehydrogenase	34.81	0.947	1.057	0.914	0.829	0.892	0.888	0.806	0.864	0.821	0.894	0.090456	0.854	0.03182	0.955	0.21696
Zm00001d047522_P001	Vacuolar-sorting receptor 1	55.905			0.73			1.078			1.279	1.477		1.752		1.186
Zm00001d014278_P001	Ras-related protein RABA4a	23.911		0.665	0.491		0.929	0.848		0.909	0.917	1.537	0.108664	1.58	0.199357	1.028	0.60062
Zm00001d017425_P001	Cytochrome b5	14.846	0.677	1.386	0.488	0.878	0.586	0.749	1.357	1.296	1.768	0.868	0.87014	1.733	0.119299	1.998	0.0102612
Zm00001d024051_P001	Adenylate kinase 4	26.458	1.197	0.951	1.109	0.98	1.019	1.007	0.886	0.888	0.961	0.923	0.33128	0.84	0.078578	0.91	0.030904
Zm00001d003446_P002	Gamma-glutamyltranspeptidase 1	61.255			0.934			0.989			1.031	1.059		1.104		1.042
Zm00001d017033_P001	Glycine-rich cell wall structural protein	11.918	0.653		0.661	0.55		0.419	0.533		0.688	0.737	0.147699	0.929	0.58882	1.26	0.33918
Zm00001d032708_P026	Serine/threonine protein phosphatase 2A regulatory subunit B''alpha	61.789			1.532			1.083			1.012	0.707		0.661		0.934
Zm00001d017435_P001	Encodes a close homolog of the Cauliflower OR (Orange) protein. The function of OR is to induce the differentiation of proplastids or other noncolored plastids into chromoplasts for carotenoid accumulation. Both proteins contain a Cysteine-rich zi /.../ger domain that is highly specific to DnaJ-like molecular chaperons.	34.687	0.863	0.843		0.734	0.824		0.673	0.773		0.913	0.25804	0.848	0.139679	0.928	0.49166
Zm00001d051552_P001	3-dehydrosphinganine reductase TSC10B	34.64			0.661			0.661			0.305	1		0.461		0.461
Zm00001d043780_P001	threonine synthase1 leaf cDNA csu189 similar to bacterial threonine synthase GN= thr1	57.614	0.698	0.655	0.875	0.81	0.929	0.909	0.864	0.836	0.88	1.189	0.140964	1.158	0.158405	0.974	0.61646
Zm00001d014761_P006	protein GN=NF-E2 inducible protein-like	53.136			1.077			0.857			0.886	0.796		0.823		1.034
Zm00001d041072_P001	ABC transporter F family member 1	66.227	0.285	0.316	0.597	1.297	1.296	1.001	1.201	1.224	1.09	3	0.0096445	2.934	0.040197	0.978	0.87
Zm00001d021810_P027	Protein STRUBBELIG-RECEPTOR FAMILY 1	46.135		1.182			0.948			0.789		0.802		0.668		0.832
Zm00001d034320_P003	Inosine-5'-monophosphate dehydrogenase	52.556	1.04	1.071	1.039	0.855	0.952	0.946	1.019	0.927	0.85	0.874	0.0199388	0.888	0.084218	1.016	0.83528
Zm00001d006124_P001	Has 2929 Blast hits to 2464 proteins in 333 species Archae - 2 GN=CONTAINS InterPro DOMAIN/s: Basic helix-loop-helix Nulp1-type (InterPro:IPR006994)	71.394	0.879	0.787		1.195	1.329		1.276	1.222		1.515	0.032403	1.499	0.020678	0.99	0.8876
Zm00001d036624_P004	Twinkle homolog protein chloroplastic/mitochondrial	58.434	0.697	0.852	1.154	1.459	1.329	0.976	0.998	0.999	1.051	1.393	0.149903	1.128	0.43862	0.81	0.24946
Zm00001d014425_P008	Glycerol-3-phosphate acyltransferase	21.543			0.995			0.973			0.904	0.978		0.909		0.929
Zm00001d031967_P004	Cytochrome c1 1 heme protein mitochondrial	33.291	1.029	1.041	1.168	0.752	1.044	0.965	0.759	1.083	0.783	0.853	0.192604	0.811	0.140159	0.951	0.73652
Zm00001d047072_P001	evolutionarily conserved C-terminal region 10	54.202		1.021			0.936			1.048		0.917		1.026		1.12
Zm00001d040953_P001	NAD(P)-binding Rossmann-fold superfamily protein	20.693	1.139	1.185	1.146	0.998	0.886	0.907	0.938	0.848	0.788	0.804	0.0046953	0.742	0.0044186	0.922	0.25744
Zm00001d028907_P031	FAD/NAD(P)-binding oxidoreductase family protein	26.953		0.861			1.186			1.107		1.377		1.286		0.933
Zm00001d015223_P001	Glycoprotein membrane precursor GPI-anchored	14.299	0.669			1.152			1.005			1.722		1.502		0.872
Zm00001d014094_P003	RNA-binding (RRM/RBD/RNP motifs) family protein	17.018		1.178			1.161			0.705		0.986		0.598		0.607
Zm00001d037264_P001	S-adenosyl-L-methionine-dependent methyltransferases superfamily protein	19.908		0.655	0.588		1.001	1.002		0.987	1.188	1.611	0.071477	1.75	0.035163	1.086	0.55424
Zm00001d047769_P001	calcium pump3 paralog of cap1 GN= cap3	115.54	0.364	0.36	0.781	1.009	1.065	0.964	1.168	1.12	1.098	2.019	0.095956	2.25	0.07564	1.115	0.032985
Zm00001d041108_P021	Probable Ufm1-specific protease	24.917	0.931	0.786		1.007	0.882		0.823	1.027		1.1	0.46272	1.077	0.6566	0.979	0.86542
Zm00001d003015_P001	phenylalanine ammonia lyase6 GN= pal6	76.777	0.458	0.449	0.519	1.242	1.355	1.382	1.186	1.168	1.237	2.79	5.594e-05	2.518	4.2209e-05	0.902	0.051378
Zm00001d031136_P003	cysteine synthase2 cDNA sequence similar to wheat cysteine synthase GN= cys2	34.133	1.008	0.993	0.978	0.916	0.898	0.951	1.065	1.045	1.076	0.928	0.0168621	1.069	0.00534	1.152	0.00167586
ZemaCp023	uncharacterized protein	83.107	1.005	1.017	0.945	1.049	1.178	1.051	0.783	0.809	0.698	1.105	0.091258	0.772	0.0065756	0.699	0.0036633
Zm00001d020664_P023	Gamma-tubulin complex component 3	72.728	1.058		0.978	0.835		1.057	0.999		0.875	0.929	0.58778	0.92	0.38794	0.99	0.9748
Zm00001d049984_P001	uncharacterized protein	8.8179	0.319	0.234		0.808	0.895		1.639	1.505		3.08	0.020025	5.685	0.0083385	1.846	0.011577
Zm00001d039043_P001	Aspartic proteinase A1	40.433			0.896			0.97			1.176	1.083		1.312		1.212
Zm00001d032708_P014	Serine/threonine protein phosphatase 2A regulatory subunit B''alpha	53.229	1.054			0.951			1.12			0.902		1.063		1.178
Zm00001d017512_P001	YbaK/aminoacyl-tRNA synthetase-associated domain	12.933	0.527			0.965			0.953			1.831		1.808		0.988
Zm00001d013397_P002	Fb27	21.262		0.681		1.619	1.349	0.786	1.03	1.477		1.837		1.841		1.002	0.92994
Zm00001d034129_P002	Peroxidase 73	27.395			0.795			1.006			0.462	1.265		0.581		0.459
Zm00001d000419_P001	HAD-superfamily hydrolase subfamily IG 5'-nucleotidase	38.018	0.627	1.194		1.058	0.902		2.038	0.736		1.076	0.74958	1.523	0.62242	1.415	0.70376
Zm00001d038358_P009	Delta-1-pyrroline-5-carboxylate synthase B	45.373	0.983	0.699	0.822	0.892	0.895	0.876	0.946	0.998	0.947	1.063	0.54548	1.155	0.20066	1.086	0.0122802
Zm00001d014082_P001	60S ribosomal protein L21-1	18.849	0.258			1.051			0.894			4.074		3.465		0.851
Zm00001d014946_P001	BAG family molecular chaperone regulator 7	46.539	0.931	1.018	1.023	0.85	0.896	0.884	1.039	1.08	1.037	0.885	0.024295	1.062	0.142382	1.2	0.00090056
Zm00001d006227_P003	Protein XAP5 CIRCADIAN TIMEKEEPER	38.999		1.047			1.121			1.103		1.071		1.053		0.984
Zm00001d037209_P002	Probable RNA-binding protein ARP1	35.02
Zm00001d019195_P001	set domain gene101 GN= sdg101	93.443	1.186			0.993			0.811			0.837		0.684		0.817
Zm00001d015020_P003	AUGMIN subunit 4	47.381		0.468	0.75		1.145	1.33		1.297	1.009	2.032	0.097362	1.893	0.132781	0.932	0.65582
Zm00001d019075_P006	RNAligase	108.86			0.912			0.962			0.971	1.055		1.065		1.009
Zm00001d046593_P001	acid phosphatase1 electrophoretic mobility GN= acp1	55.046	0.88	0.999	1.003	1.012	1.141	0.996	1.083	1.058	1.062	1.093	0.2184	1.111	0.069344	1.017	0.68768
Zm00001d030149_P001	ATP-dependent Clp protease proteolytic subunit	33.92	0.975	0.501	1.052	0.981	1.042	1.014	0.82	0.797	0.634	1.201	0.42658	0.89	0.78776	0.741	0.021382
Zm00001d051157_P001	Adenosine kinase 2	37.003	1.162	1.103	1.147	1.203	0.996	0.961	0.982	1.019	0.991	0.926	0.3178	0.877	0.0024003	0.947	0.5534
Zm00001d036530_P033	uncharacterized protein	14.324		1.445			1.205			1.08		0.834		0.747		0.896
Zm00001d027895_P004	CTC-interacting domain 7	56.357		0.685			1.12			1.094		1.635		1.597		0.977
Zm00001d038703_P001	O-methyltransferase ZRP4	38.816	0.262	0.312	0.265	1.214	1.376	1.394	0.702	0.819	0.686	4.749	2.3153e-05	2.631	0.0002592	0.554	0.00112498
Zm00001d041553_P001	Osmotin-like protein	18.681	0.549	0.27	0.439	0.631	0.307	0.524	0.579	0.298	0.499	1.162	0.6481	1.094	0.76408	0.941	0.86156
Zm00001d052595_P001	Ribulose bisphosphate carboxylase small chain%2C chloroplastic	19.151	0.847	0.848	0.93	0.9	0.829	0.887	0.759	0.729	0.716	0.997	0.9419	0.84	0.0079644	0.843	0.0050426
Zm00001d029979_P002	Histone H3 K4-specific methyltransferase SET7/9 family protein	25.131			0.897			1.003			1.134	1.118		1.264		1.131
Zm00001d051065_P002	Nuclear cap-binding protein subunit 2	11.523		0.695			1.18			1.227		1.698		1.765		1.04
Zm00001d009657_P006	60S acidic ribosomal protein P2-5	11.329	0.819		0.885	1.318	1.457	1.098	1.177	0.831	1.202	1.515	0.034315	1.256	0.26508	0.829	0.25194
Zm00001d026153_P001	SPT2 chromatin protein	81.003	0.447			0.881			1.22			1.971		2.729		1.385
Zm00001d009967_P001	UDP-sulfoquinovose synthase chloroplastic	52.452	1.164	1.142	1.176	1.076	1.094	1.091	0.843	0.931	1.056	0.937	0.0028189	0.813	0.084543	0.868	0.155199
Zm00001d000345_P001	uncharacterized protein	23.095	1.077	0.829	1.041	1.032	0.905	0.989	0.902	1.008	0.981	0.993	0.9829	0.981	0.88452	0.988	0.83084
Zm00001d011775_P006	Protein TRIGALACTOSYLDIACYLGLYCEROL 2 chloroplastic	30.566			1.148			0.93			0.887	0.81		0.773		0.954
Zm00001d011204_P001	uncharacterized protein	15.301		1.366			1.235			1.104		0.904		0.808		0.894
Zm00001d052079_P050	Lysine-ketoglutarate reductase/saccharopine dehydrogenase1	105.9		0.857			1.072			1.004		1.251		1.172		0.937
Zm00001d053798_P001	Glyceraldehyde-3-phosphate dehydrogenase GAPCP1 chloroplastic	39.26	1.061	0.878	0.951	0.985	0.995	0.982	1.015	1.15	1.082	1.025	0.66552	1.124	0.146197	1.096	0.129821
Zm00001d014817_P001	GDSL esterase/lipase	39.457	0.135		0.388	0.803		0.931	1.305		1.043	3.315	0.130145	4.489	0.094465	1.354	0.155336
Zm00001d049479_P006	Regulator of Vps4 activity in the MVB pathway protein	51.622	1.101	0.996	0.915	1.043	0.995	1.001	0.86	0.77	1.011	1.009	0.84504	0.877	0.23054	0.869	0.1428
Zm00001d042180_P001	VAP27-2	43.364		0.941	0.99		1.02	1.028		0.933	1.016	1.061	0.147842	1.009	0.877	0.952	0.35968
Zm00001d019060_P001	deoxy xylulose synthase 2 root specific GN= dxs2	77.212	0.319	0.401	0.488	0.846	0.793	0.897	1.268	1.198	1.156	2.099	0.004117	2.998	0.00090109	1.428	0.00132224
Zm00001d015274_P001	Pyridoxamine 5-phosphate oxidase family protein	43.574	0.688	0.75	0.995	1.162	0.942	0.901	1.025	0.774	0.811	1.235	0.185523	1.073	0.62266	0.869	0.29076
Zm00001d009702_P002	P-loop containing nucleoside triphosphate hydrolases superfamily protein	65.899			0.69			1.144			1.18	1.658		1.71		1.031
Zm00001d023311_P001	Os01g0112866 protein	134.94	0.707	0.58		1.011	0.791		0.956	1.046		1.4	0.168318	1.556	0.054683	1.111	0.4826
Zm00001d014146_P001	Hsp20/alpha crystallin family protein	21.603	0.497		0.579	1.303		1.131	0.683		0.843	2.262	0.0158636	1.418	0.116505	0.627	0.065741
Zm00001d017857_P004	adenine nucleotide translocator1 leaf cDNA, open reading frame encodes 40,519 Da polypeptide GN= ant1	42.391	1.032	1.051	1.039	0.915	0.963	0.96	0.999	0.967	1.041	0.909	0.0053231	0.963	0.159384	1.06	0.099583
Zm00001d012693_P004	Solute carrier family 23 member 2	36.641		1.041			1.117			0.796		1.073		0.765		0.713
Zm00001d048373_P002	Carotenoid 910(9'10')-cleavage dioxygenase 1	62.055		0.847			0.974			1.025		1.15		1.21		1.052
Zm00001d003379_P001	Major latex protein 22%3B Pathogenesis-related protein 2	17.111	1.686	0.95	1.461	0.617	0.761	0.856	0.955	1.318	1.052	0.545	0.040819	0.812	0.38994	1.488	0.042402
Zm00001d028428_P002	Calcium-binding EF-hand family protein	27.708	1.611	1.45	1.497	1.568	1.381	1.49	1.309	1.664	1.482	0.974	0.60814	0.977	0.7433	1.004	0.99842
Zm00001d008439_P002	Protein decapping 5	64.356	1.122	1.165	1.092	1.019	1.075	0.979	0.844	0.875	0.9	0.909	0.044482	0.775	0.00064305	0.852	0.0083213
Zm00001d017639_P001	Chitinase 1	31.285	0.509		0.509	0.465		0.442	0.422		0.542	0.891	0.044798	0.947	0.66786	1.063	0.7161
Zm00001d013099_P001	Probable carboxylesterase 15	36.141	0.866	0.907	0.978	0.902	1.018	0.929	1.483	1.39	1.262	1.036	0.52968	1.503	0.0022955	1.451	0.0033204
Zm00001d052709_P014	Putative RING zinc finger domain superfamily protein	15.165			0.387			1.397			1.326	3.61		3.426		0.949
Zm00001d050011_P001	Alpha carbonic anhydrase 7	31.236	0.719	0.241	0.236	1.166	1.164	1.158	1.244	1.916	1.75	2.916	0.080584	4.105	0.0168776	1.408	0.131838
Zm00001d042207_P001	Esterase PIR7B	55.881	0.7			0.803			1.538			1.147		2.197		1.915
Zm00001d041719_P001	Heat shock protein 90-6 mitochondrial	91.178	0.92	0.828	0.893	1.095	1.027	1.089	1.082	1.109	1.101	1.216	0.0063819	1.246	0.0023447	1.025	0.31038
Zm00001d037937_P001	DUF538 family protein	18.321		1.08	1.04		1.109	1.245		0.943	1.175	1.11	0.2319	0.999	0.95694	0.9	0.4694
Zm00001d018012_P001	uncharacterized protein	44.715		0.695			1.364			1.156		1.963		1.663		0.848
Zm00001d027352_P002	Pyridoxine/pyridoxamine 5'-phosphate oxidase 2	8.9302
Zm00001d007133_P008	Histone-arginine methyltransferase CARM1	35.368			0.959			0.848			0.888	0.884		0.926		1.047
Zm00001d046005_P001	Glycosyltransferase family 61 protein	64.161	0.338	0.345		1.084	1.054		1.319	1.384		3.13	0.00023591	3.958	0.00036057	1.264	0.0138363
Zm00001d038449_P002	Sorting nexin 2B	39.428		0.344			1.178			1.161		3.424		3.375		0.986
Zm00001d049804_P001	NAD-dependent epimerase/dehydratase family protein	47.919		0.951			0.925			0.802		0.973		0.843		0.867
Zm00001d037984_P003	Chlorophyll synthase chloroplastic	12.787	1.119			0.886			0.92			0.792		0.822		1.038
Zm00001d003974_P001	Phosphoenolpyruvate carboxylase family protein	13.802	1.083	1.038	1.092	0.774	0.853	0.903	0.819	0.868	0.933	0.787	0.0072231	0.815	0.0073592	1.036	0.57754
Zm00001d025793_P003	Gamma-tubulin complex component 2	62.17	0.711		1.173	1.505		0.958	1.554		1.074	1.307	0.50216	1.395	0.38088	1.067	0.8254
Zm00001d024311_P003	SKP1-like protein 21	20.136	0.985	0.667	0.818	0.965	1.083	1.02	1.013	0.967	0.946	1.242	0.12374	1.185	0.187521	0.954	0.29674
Zm00001d018181_P001	flavonol synthase2 Tightly linked tandem duplication of fls1 GN= fls2	34.947
Zm00001d014382_P005	Rab geranylgeranyl transferase like protein	79.331			0.715			1.069			1.062	1.495		1.485		0.993
Zm00001d009661_P007	uncharacterized protein	46.923	0.874	0.862	1.038	0.999	1.274	1.067	0.882	1.203	1.077	1.204	0.122083	1.14	0.3095	0.947	0.64674
Zm00001d027539_P001	glutathione transferase11 GN= gst11	34.117	1.137	1.065	1.086	1.377	1.308	1.319	0.823	0.833	0.903	1.218	0.00141891	0.778	0.00199703	0.639	0.000176935
Zm00001d018454_P009	Glutathione reductase cytosolic	49.737	0.767	0.818	0.81	0.842	0.885	0.906	1.226	1.171	1.161	1.099	0.032445	1.486	0.000115957	1.351	0.00039535
Zm00001d043305_P003	ARM repeat superfamily protein	43.994		1.175			0.96			0.916		0.817		0.78		0.954
Zm00001d037483_P001	Vesicle-associated membrane protein 711	24.91	1.129	1.129	0.996	1.135	1.312	1.078	1.044	1.119	1.191	1.083	0.33924	1.031	0.61752	0.951	0.5335
Zm00001d031002_P003	Tetratricopeptide repeat (TPR)-like superfamily protein	36.06	0.867	0.906	0.823	0.895	0.943	0.97	0.928	0.976	0.984	1.082	0.096778	1.112	0.032376	1.028	0.3967
Zm00001d011563_P006	P-loop containing nucleoside triphosphate hydrolases superfamily protein	12.922	0.944			1.161			0.828			1.23		0.877		0.713
Zm00001d048023_P012	Nuclear pore complex protein NUP133	132.89	0.92	1.054		1.152	1.096		1.14	0.995		1.139	0.20992	1.082	0.50058	0.95	0.53658
Zm00001d053675_P003	Lipoxygenase 2 chloroplastic	102.05	0.657	0.638	0.585	0.774	0.729	0.794	0.655	0.764	0.722	1.222	0.0095585	1.139	0.085584	0.932	0.23696
Zm00001d002006_P002	H(+)-ATPase 5	70.846	1.084	1.1	1.245	1.016	0.928	0.908	0.813	0.823	0.82	0.832	0.030258	0.716	0.0171845	0.861	0.050358
Zm00001d045894_P002	CDK5RAP3-like protein	62.74	1.049	0.754	0.834	1.231	1.077	1.194	1.146	1.18	1.223	1.328	0.050864	1.346	0.036945	1.013	0.75986
Zm00001d009613_P001	Protease Do-like 1 chloroplastic	48.323		1.058	0.751		0.704	0.89		0.922	0.857	0.881	0.62502	0.983	0.98878	1.116	0.44456
Zm00001d039522_P023	EXPRESSED IN 24 plant structures GN=LOCATED IN: vacuole	136.79	0.916		0.951	1.028		1.021	0.999		1.041	1.097	0.039364	1.093	0.086241	0.996	0.84576
Zm00001d008203_P005	protoporphyrinogen IX oxidase1 Ortholog of Arabidopsis PPOX/ PPO1. protoporphyrinogen oxidase. (A. Barkan, 2015)complements E coli mutant GN= prpo1	54.557	1.017	1.243	0.702	1.044	1.153	1.073	1.021	1.044	1.288	1.104	0.50248	1.132	0.47116	1.025	0.81108
Zm00001d003258_P001	Elongator complex protein 3	63.766			0.887			1.071			1.061	1.207		1.196		0.991
Zm00001d024319_P001	26S proteasome non-ATPase regulatory subunit 8 homolog A	30.781	0.949	1.26	1.035	1.02	1.193	1.074	1.06	1.022	1	1.013	0.85868	0.95	0.63136	0.938	0.27198
Zm00001d004894_P001	ribulose bisphosphate carboxylase small subunit2 probed locus GN= ssu2	19.091	0.994	0.954	0.875	0.824	1.051	0.781	0.826	0.699	0.732	0.941	0.52834	0.8	0.022643	0.85	0.2064
Zm00001d041609_P001	DNA-directed RNA polymerase subunit	12.958	1.034	1.045	1.321	1.027	1.113	0.934	0.997	0.942	0.965	0.904	0.36424	0.854	0.137183	0.945	0.36334
Zm00001d025904_P001	Carrier protein	44.487
Zm00001d020799_P018	isoamylase-type starch debranching enzyme3 GN= iso3	55.783	0.962			1.042			0.952			1.083		0.99		0.914
Zm00001d004176_P001	ER membrane protein complex subunit 8/9 homolog	15.73	0.921	0.919	0.91	0.948	0.915	0.876	0.926	0.984	0.966	0.996	0.8548	1.046	0.072481	1.05	0.16712
Zm00001d034733_P001	Galactokinase	54.371	0.831	0.896	0.774	0.893	0.905	0.927	1.028	0.987	1.042	1.09	0.11568	1.222	0.0111153	1.122	0.004258
Zm00001d041420_P015	H+-translocating pyrophosphatase	59.099	1.057			0.983			0.95			0.93		0.899		0.966
Zm00001d039345_P001	Indole-3-acetic acid-amido synthetase GH3.6	65.852	1.238	1.186	1.092	0.942	1.273	0.914	0.824	1.036	0.937	0.89	0.32082	0.796	0.037739	0.894	0.44754
Zm00001d045625_P001	Putative RING zinc finger domain superfamily protein isoform 1%3B Putative RING zinc finger domain superfamily protein isoform 2	32.443	1.006		0.948	0.897		1.001	0.972		1.006	0.971	0.67664	1.012	0.7505	1.042	0.53548
Zm00001d013079_P001	Thioredoxin-like protein 1	21.418			1.216			1.083			1.315	0.891		1.081		1.214
Zm00001d029422_P021	uncharacterized protein	151			0.589			1.001			1.239	1.699		2.104		1.238
Zm00001d042627_P007	UDP-glucuronate:xylan alpha-glucuronosyltransferase 1	73.18		0.472			1.365			1.254		2.892		2.657		0.919
Zm00001d021421_P020	UDP-glucose pyrophosphorylase2 second locus with homology to T14797 GN= ugp2	52.177	1.034	0.973	1	0.962	1.039	0.965	1.014	1.084	0.952	0.986	0.67076	1.014	0.7675	1.028	0.57992
Zm00001d005507_P022	Mediator of RNA polymerase II transcription subunit 14	95.687	0.95	1.141		1.047	1.029		0.893	0.871		0.993	0.97658	0.844	0.21448	0.85	0.0085818
Zm00001d048393_P001	Ras-related protein RABC2a	33.579		1.178			0.99			0.952		0.84		0.808		0.962
Zm00001d034005_P006	evolutionarily conserved C-terminal region 2	60.622		0.774	0.925		1.166	0.868		1.09	1.028	1.197	0.42112	1.247	0.139584	1.041	0.76738
Zm00001d021299_P001	Phosphatase DCR2	45.092	0.644	0.856	0.802	0.976	0.837	0.963	1.122	1.026	1.137	1.206	0.124655	1.427	0.0170201	1.183	0.044681
Zm00001d005558_P004	Putative leucyl-tRNA synthetase	123.06	0.544	1.073	0.594	0.704	0.944	0.953	0.795	0.947	0.656	1.176	0.4415	1.085	0.6465	0.922	0.59888
Zm00001d000099_P004	Beta-13-galactosyltransferase 7	43.586			0.634			1.128			1.119	1.779		1.765		0.992
Zm00001d047799_P002	Heat shock 70 kDa protein 5	71.501	1.213	1.186	1.416	1.157	1.046	1.004	0.826	0.832	0.805	0.841	0.069265	0.646	0.00154433	0.768	0.0037578
Zm00001d027293_P010	signal recognition particle protein subunit 9 GN= spr9	66.508	0.741	0.632	0.662	1.413	1.381	1.289	1.163	1.173	1.051	2.006	0.00021889	1.664	0.00097941	0.83	0.013879
Zm00001d021249_P004	Bifunctional UDP-glucose 4-epimerase and UDP-xylose 4-epimerase 1	20.716			0.765			1.008			1.652	1.318		2.159		1.639
Zm00001d008622_P002	Synaptic glycoprotein SC2	47.019	1.267	1.238	1.149	0.952	0.87	0.963	0.921	0.918	1.01	0.762	0.0033783	0.78	0.0044231	1.023	0.63864
Zm00001d015423_P005	NudC domain-containing protein 2	16.992			1.177			0.877			0.727	0.745		0.618		0.829
Zm00001d052525_P005	Calmodulin binding protein%3B Putative calmodulin-binding family protein	33.963	1.261	1.118	1.209	0.852	1.058	1.043	0.962	0.929	0.833	0.823	0.064515	0.759	0.0078179	0.922	0.39788
Zm00001d023640_P002	Ubiquitin carboxyl-terminal hydrolase 13	126.4		1.021			1.043			0.891		1.022		0.873		0.854
Zm00001d052718_P001	60S ribosomal protein L38	8.0625	1.423	1.043	1.269	0.721	0.72	0.813	0.936	1.277	1.019	0.603	0.0073625	0.865	0.32528	1.434	0.024997
Zm00001d012575_P003	Protein MICRORCHIDIA 6	67.78		0.516			0.545			1.442		1.056		2.795		2.646
Zm00001d018277_P003	UMP-CMP kinase 3	23.421	0.806	1.123	1.062	0.984	0.864	1.227	1.139	1.173	1.222	1.028	0.85994	1.182	0.166461	1.149	0.22584
Zm00001d012982_P001	NAD(P)-binding Rossmann-fold superfamily protein	40.001	1.015	0.998	1.009	0.937	0.795	0.939	0.722	0.73	0.874	0.884	0.149822	0.77	0.05058	0.871	0.168437
Zm00001d005108_P008	SNF1-related protein kinase catalytic alpha subunit KIN10	57.054		1.27			1.052			0.912		0.828		0.718		0.867
Zm00001d040399_P001	Peroxidase 24	36.491	1.085	1.057	1.057	0.804	0.87	0.846	1.006	0.943	0.987	0.788	0.00063815	0.918	0.0150383	1.165	0.0070047
Zm00001d032500_P001	Methionine aminopeptidase 1A	27.386	0.694	0.331	0.67	0.772	0.851	0.832	1.017	0.925	0.952	1.448	0.22416	1.707	0.136782	1.179	0.0155239
Zm00001d047455_P006	Alpha-N-acetylglucosaminidase	92.2	1.082	1.055	1.005	1.045	1.126	1.11	0.971	1.022	0.956	1.044	0.24186	0.939	0.099081	0.899	0.025018
Zm00001d028815_P001	AccQ41298_SORBI] GN=Pathogenesis-related protein [source:UniProtKB/TrEMBL	16.942	0.365	0.438	0.426	0.78	0.878	0.866	2.077	2.441	2.369	2.054	0.00044237	5.604	2.08e-05	2.729	8.302e-05
Zm00001d052653_P004	respiratory burst oxidase4 GN= rboh4	104.48	0.555	0.576	0.622	1.101	1.083	1.1	1.179	1.156	1.118	1.873	0.0029039	1.97	5.5877e-05	1.051	0.03816
Zm00001d034824_P001	Galactose mutarotase-like superfamily protein	36.502	1.132	0.987	1.105	0.914	0.829	0.978	1.007	0.884	0.945	0.844	0.056284	0.88	0.086598	1.042	0.5262
Zm00001d044288_P001	alpha/beta-Hydrolases superfamily protein	30.127	1.27	1.215	1.236	1.108	1.026	1.055	1.175	1.266	1.24	0.857	0.0039592	0.989	0.68716	1.154	0.0105007
Zm00001d001935_P001	Leucine--tRNA ligase cytoplasmic	126.18	1.046		1.223	0.995		1.049	0.97		1.12	0.901	0.34288	0.921	0.52212	1.023	0.81824
Zm00001d006481_P002	BNR/Asp-box repeat family protein	34.444	0.967	1.099	0.987	0.752	0.843	0.904	0.894	0.685	0.769	0.819	0.039184	0.769	0.03698	0.94	0.52434
Zm00001d012770_P005	Putative translation elongation factor family protein	93.906	1.362	1.357	1.637	1.428	1.605	1.776	1.647	1.588	1.627	1.104	0.32568	1.116	0.144717	1.011	0.82822
Zm00001d018161_P001	Ferredoxin--nitrite reductase chloroplastic	67.417		0.624			1.07			1.043		1.715		1.671		0.975
Zm00001d009693_P003	Protein REDUCED WALL ACETYLATION 3	62.842		1.323			1.235			0.947		0.933		0.716		0.767
Zm00001d042709_P001	NPL4-like protein 1	45.748		1.062	0.859		0.789	1.016		0.889	0.967	0.94	0.73308	0.966	0.81904	1.028	0.81762
Zm00001d018349_P003	T-complex protein 1 subunit alpha	59.266	0.86		0.8	0.807		0.794	0.97		1.183	0.964	0.43846	1.297	0.1365	1.345	0.099678
Zm00001d006587_P001	Chlorophyll a-b binding protein CP29.1 chloroplastic	31.41	1.185	1.462	1.147	1.498	1.296	1.532	0.799	0.811	0.744	1.14	0.21922	0.62	0.004236	0.544	0.00049902
Zm00001d022141_P005	DNA-directed RNA polymerase subunit	13.173			0.445			0.979			0.994	2.2		2.234		1.015
Zm00001d036441_P001	zinc finger (C2H2 type) family protein	11.401	0.718		0.698	1.087		1.036	1.052		1.034	1.499	0.0047036	1.473	0.00181996	0.983	0.56726
Zm00001d031309_P001	Cytochrome c oxidase assembly protein COX15	33.118			0.747			0.806			1.185	1.079		1.586		1.47
Zm00001d042870_P001	Phospholipid:diacylglycerol acyltransferase 1	44.826
Zm00001d003502_P006	Signal recognition particle 19 kDa protein	16.06	0.609	0.657	0.717	1.034	1.154	1.094	0.892	1.04	0.973	1.655	0.00088285	1.465	0.00414	0.885	0.087376
Zm00001d010944_P001	DUF724 domain-containing protein 2	49.586	1.099	1.206	1.085	1.005	0.996	0.972	0.82	0.894	0.883	0.877	0.020024	0.766	0.0034234	0.874	0.0091551
Zm00001d033247_P004	nucleosome/chromatin assembly factor C GN= nfc103a	42.866	1.07	1.036	0.811	0.957	0.977	1.058	0.968	1.064	0.995	1.026	0.74826	1.038	0.65954	1.012	0.79072
Zm00001d046369_P002	Serine/threonine-protein phosphatase	35.157	0.722	0.365	0.38	0.926	1.068	0.984	1.323	1.166	1.138	2.03	0.027999	2.472	0.0134016	1.218	0.034396
Zm00001d024640_P002	Oxidoreductase family protein	41.629	0.958			0.987			0.898			1.03		0.937		0.91
Zm00001d042746_P003	Uricase	34.437	1.094	1.158	1.064	1.029	1.059	0.971	1.33	1.342	1.279	0.922	0.086403	1.191	0.0037366	1.292	0.00096149
Zm00001d007067_P002	Transmembrane protein 115	33.637	1.087	1.21	1.132	1.039	1.042	0.96	0.866	0.894	1.052	0.887	0.043763	0.82	0.041455	0.925	0.28544
Zm00001d011162_P002	ras-related protein RIC1 GN= ric1	22.506	0.84	0.996	0.941	1.007	0.995	1.018	1.09	0.973	0.984	1.088	0.22956	1.097	0.20276	1.009	0.84564
Zm00001d022206_P003	4-alpha-glucanotransferase DPE1 chloroplastic/amyloplastic	47.364	1.174	1.099		1.054	1.002		0.936	1.034		0.905	0.137777	0.867	0.137839	0.958	0.5163
Zm00001d033292_P004	P-loop containing nucleoside triphosphate hydrolases superfamily protein	61.431	1.014	0.994	1.067	1.22	1.327	1.157	1.184	1.11	1.031	1.205	0.0148961	1.081	0.163616	0.898	0.128621
Zm00001d020762_P001	Chaperone DnaJ-domain superfamily protein	46.294
Zm00001d018409_P003	26S protease regulatory subunit 6A homolog A	46.974	1.065	0.683	0.333	1.075	0.836	0.989	0.898	0.894	1.041	1.394	0.27944	1.361	0.35122	0.977	0.8294
Zm00001d031636_P001	Lipid transfer protein	18.769			1.469			1.215			1.046	0.827		0.712		0.861
Zm00001d022322_P001	SWI/SNF complex component SNF12 homolog	57.995	1.053	0.949		1.188	1.161		0.986	1.113		1.173	0.094062	1.048	0.61686	0.894	0.20496
Zm00001d053308_P007	uncharacterized protein	78.475		0.74	0.835		0.763	0.766		0.931	0.951	0.971	0.7253	1.195	0.099242	1.231	0.0026986
Zm00001d018966_P001	Acidic endochitinase	33.748	0.255	0.306	0.436	0.618	0.631	0.608	1.051	1.085	1.098	1.863	0.054644	3.244	0.0168438	1.742	2.5755e-06
Zm00001d024307_P007	UDP-N-acetylglucosamine diphosphorylase 2	54.855	0.768	1.011	1.097	0.943	0.896	0.954	0.946	0.905	0.891	0.971	0.87488	0.953	0.75356	0.982	0.5235
Zm00001d032505_P001	Chaperone protein dnaJ 13	56.636	1.905	1.18	1.195	1.947	0.973	0.908	1.351	0.91	0.932	0.894	0.63552	0.746	0.23432	0.834	0.64832
Zm00001d052209_P001	Cytokinin-O-glucosyltransferase 2	53.318	0.404	0.8	0.509	1.115	1.094	1.002	1.241	1.184	1.179	1.874	0.030277	2.104	0.059944	1.122	0.034157
Zm00001d003470_P001	Probable plastid-lipid-associated protein 2 chloroplastic	34.28	0.649	0.456	0.689	0.561	0.472	0.606	0.491	0.622	0.703	0.914	0.61916	1.012	0.92268	1.108	0.49264
Zm00001d030091_P001	uncharacterized protein	37.041	1.068		1.132	1.04		0.837	0.922		0.906	0.853	0.28146	0.831	0.025978	0.974	0.8674
Zm00001d053800_P002	Glycine cleavage system H protein 2 mitochondrial	17.323	1.084	1.119	1.17	0.92	0.995	0.917	0.891	0.754	0.966	0.84	0.0072399	0.774	0.026756	0.922	0.33146
Zm00001d031539_P002	S-adenosyl-L-methionine-dependent methyltransferases superfamily protein	27.334	1.021	1.1	0.932	0.896	1.019	0.945	1.052	0.902	0.912	0.937	0.34872	0.939	0.40966	1.002	0.9879
Zm00001d037590_P001	protein disulfide isomerase7 GN= pdi7	40.056	0.919	0.624	1.065	0.908	0.806	0.886	1.075	1.178	1.058	0.997	0.90872	1.27	0.183177	1.273	0.0080604
Zm00001d043119_P001	Protein RETICULATA-RELATED 3 chloroplastic	35.139	1.461	1.407	1.236	1.085	1.132	1.142	1.031	0.992	1.056	0.818	0.020258	0.75	0.006098	0.917	0.0225
Zm00001d001932_P002	Probable plastid-lipid-associated protein 13 chloroplastic	32.536	0.917		0.809	0.887		0.984	0.84		0.815	1.084	0.42298	0.959	0.5968	0.885	0.153664
Zm00001d003685_P001	COP9 signalosome complex subunit 8	22.11		1.079	1.052		0.96	0.929		0.922	0.895	0.886	0.028315	0.853	0.0146772	0.962	0.2215
Zm00001d038616_P001	ER6 protein	28.646	1.234	1.203	1.144	0.981	1.073	1.11	0.913	0.898	0.994	0.884	0.044305	0.783	0.0031442	0.887	0.068339
Zm00001d040344_P001	UBP1-associated protein 2A	46.622	1.012	0.72	0.523	1.274	1.365	1.557	0.916	1.148	1.252	1.861	0.030596	1.471	0.123217	0.79	0.09456
Zm00001d017153_P005	LUC7 related protein	48.125	0.869	0.869	0.731	1.202	1.139	1.17	1.032	1.061	1.074	1.422	0.0040042	1.283	0.0128016	0.902	0.0061779
Zm00001d047667_P004	Argininosuccinate lyase chloroplastic	46.43	0.999	1.129	1.101	1.108	1.16	1.183	1.112	1.021	1.048	1.069	0.183741	0.985	0.76772	0.922	0.062241
Zm00001d025400_P001	monooxygenase 1	48.085		0.493			1.138			0.835		2.308		1.694		0.734
Zm00001d034516_P004	squalene synthase homolog1 Designation as sqsh1 based on high homology to sqs1 sequence GN= sqsh1	36.466		0.978	1.264		0.856	0.92		0.755	0.779	0.792	0.2327	0.684	0.102722	0.864	0.065461
Zm00001d001763_P001	Probable methyltransferase	29.35	0.961		1.026	1.07		0.961	1.043		0.976	1.022	0.7703	1.016	0.76468	0.994	0.94372
Zm00001d031132_P002	Copper transport protein ATX1	8.738	1.037	1.048	1.08	0.916	0.933	0.891	0.994	1.009	1.003	0.866	0.001341	0.95	0.0164395	1.097	0.0027404
Zm00001d019115_P005	Cleavage and polyadenylation specificity factor (CPSF) A subunit protein	97.764	1.053	0.932		0.955	1.023		1.018	1.094		0.996	0.97716	1.064	0.46638	1.068	0.31892
Zm00001d016134_P002	iron-sulfur protein1 one of two very similar cDNAs recovered by antiserum screen from B73 seedling leaf RNA, both transcribed in leaf tissue (Barkan and Walker 1994) GN= ris1	24.054	1.135	1.138	1.14	1.212	1.143	1.162	0.99	0.96	1.071	1.03	0.23162	0.885	0.06356	0.859	0.0144433
Zm00001d003277_P005	Stachyose synthase	81.873		0.807			0.852			1.101		1.056		1.364		1.292
Zm00001d003257_P001	26S proteasome non-ATPase regulatory subunit 6 homolog	44.067	0.967	1.265	1.14	1.066	1.025	1.088	1.035	1.007	1.132	0.943	0.54308	0.941	0.55148	0.998	0.95196
Zm00001d041854_P003	Protein-tyrosine-phosphatase PTP1	24.35		0.733	0.729		0.973	1.151		0.992	1.454	1.453	0.142202	1.673	0.23402	1.152	0.6062
Zm00001d047723_P002	Tetratricopeptide repeat (TPR)-like superfamily protein	47.545	1.345		1.492	1.106		0.869	0.91		0.77	0.696	0.107119	0.592	0.033198	0.851	0.39406
Zm00001d039138_P016	GBF-interacting protein 1	73.886		0.572			1.024			0.984		1.79		1.72		0.961
Zm00001d002139_P001	Transferase	52.184	1.375			1.266			1.384			0.921		1.007		1.093
Zm00001d001901_P004	Reticulon-like protein B11	5.5343	0.78	0.295	0.937	0.927	1.111	0.845	1.214	1.2	0.923	1.433	0.27434	1.659	0.174118	1.157	0.29434
Zm00001d006341_P001	Molybdenum cofactor sulfurase family protein	29.5
Zm00001d042035_P001	Probable sarcosine oxidase	43.111	0.785	0.78	0.762	0.874	0.861	0.979	1.104	1.062	0.932	1.166	0.02148	1.331	0.0054975	1.141	0.114617
Zm00001d048689_P034	AAA-type ATPase family protein	125.89	0.761	0.571	0.399	0.932	1.191	1.292	0.906	0.915	0.848	1.973	0.028895	1.542	0.131463	0.782	0.078296
Zm00001d011418_P004	cytochrome P450 family 72 subfamily A polypeptide 8	49.814	0.67	0.461	0.326	1.207	1.097	1.211	1.196	1.231	1.289	2.412	0.04832	2.55	0.042756	1.057	0.2239
Zm00001d031643_P006	3'-5'-exoribonuclease family protein	25.095			1.087			1.023			0.94	0.941		0.865		0.919
Zm00001d015431_P001	Fiber protein Fb15	10.654	1.17	0.95	1.112	0.934	1.034	0.992	1.23	1.298	1.146	0.916	0.2877	1.137	0.144945	1.241	0.0098249
Zm00001d038057_P002	Acyl carrier protein	13.629	1.129	1.109	1.011	1.063	0.986	0.949	1.131	1.014	1.144	0.923	0.167719	1.012	0.82798	1.097	0.143861
Zm00001d037877_P015	Elongation factor 1-alpha	19.902
Zm00001d034337_P006	AP-1 complex subunit sigma-2	18.69	1.274	1.229		1.034	1.065		0.718	0.878		0.839	0.0170393	0.638	0.046939	0.76	0.111159
Zm00001d052493_P003	Aluminium induced protein with YGL and LRDR motifs	29.3	1.255	1.151	1.393	0.82	1.226	0.848	1.025	0.989	0.94	0.762	0.110623	0.778	0.0147234	1.021	0.79144
Zm00001d028511_P051	ARM repeat superfamily protein	75.801
Zm00001d033776_P006	Vacuolar sorting protein 39	97.704		1.123			0.88			0.943		0.784		0.84		1.072
Zm00001d004930_P001	Peptidyl-prolyl cis-trans isomerase FKBP42	41.996	1.045		0.902	0.991		0.975	0.892		1.078	1.01	0.88254	1.012	0.9413	1.002	0.98206
Zm00001d012625_P001	L-type lectin-domain containing receptor kinase IX.1	73.903	0.582	0.808	0.621	1.176	1.116	1.11	1.168	1.092	1.207	1.692	0.0062835	1.724	0.0060841	1.019	0.62444
Zm00001d029839_P005	Protein NEN2	31.448		0.482			0.505			0.391		1.048		0.811		0.774
Zm00001d041280_P001	ubiquitin-specific protease 8	99.137		0.915			1.115			0.976		1.219		1.067		0.875
Zm00001d031279_P002	uncharacterized protein	19.042	0.764	0.96	0.651	0.721	0.763	1.086	0.689	0.449	0.661	1.082	0.68414	0.757	0.185318	0.7	0.128761
Zm00001d035014_P001	sequence-specific DNA binding transcription factors	38.868	0.945	1.036	1.024	0.893	0.905	0.942	0.9	0.97	1.206	0.912	0.050057	1.024	0.86836	1.123	0.2925
Zm00001d047601_P016	Pre-mRNA-splicing factor ATP-dependent RNA helicase%3B Putative RNA helicase family protein	82.067		0.909			0.964			0.923		1.061		1.015		0.957
Zm00001d016559_P002	Ubiquitin-activating enzyme E1 domain-containing protein 1	46.427	1.018	1.026	1.021	0.931	1.009	0.921	0.872	0.982	0.927	0.933	0.137179	0.907	0.103439	0.972	0.55646
Zm00001d044033_P002	TRICHOME BIREFRINGENCE-LIKE 20	24.724	1.004			1.089			0.991			1.085		0.987		0.91
Zm00001d009938_P006	alpha/beta-Hydrolases superfamily protein	25.718	1.051	0.983	0.877	0.856	0.786	0.823	0.913	0.917	0.88	0.847	0.04806	0.931	0.27396	1.099	0.026978
Zm00001d017756_P001	Syntaxin-22	27.408	1.052	1.032	1.04	0.909	0.871	0.871	0.756	0.729	0.767	0.849	0.0004222	0.721	3.7297e-05	0.849	0.00141888
Zm00001d026609_P002	uncharacterized protein	16.039		0.842	0.526		1.711	1.947		1.868	2.128	2.674	0.053796	2.921	0.046098	1.092	0.43724
Zm00001d029708_P001	glutathione transferase30 GN= gst30	25.224	0.635	0.552	0.696	0.591	0.509	0.58	1.182	1.151	1.095	0.892	0.24538	1.82	0.00105734	2.04	0.000161383
Zm00001d050218_P001	NADPH--cytochrome P450 reductase	77.085	0.56	0.522	0.547	1.423	1.422	1.332	1.363	1.223	1.252	2.564	3.1166e-06	2.356	2.2557e-05	0.919	0.097345
Zm00001d034893_P004	SNARE-like superfamily protein	14.664	0.747	0.808		1.064	1.044		0.992	1.132		1.356	0.0170803	1.366	0.056102	1.008	0.94252
Zm00001d011850_P001	Has 1074 Blast hits to 1072 proteins in 474 species Archae - 213 GN=CONTAINS InterPro DOMAIN/s: UPF0103/Mediator of ErbB2-driven cell motility (Memo) related (InterPro:IPR002737)	32.937			1.138			0.999			1.019	0.878		0.895		1.02
Zm00001d004125_P006	acetyl-CoA carboxylase2 graminicide (e.g., sethoxydim, haloxyfop) resistance GN= acc2	256.85	1.067	1.06	0.999	1.008	1.02	1.041	0.999	1.016	1.006	0.982	0.47554	0.966	0.191579	0.984	0.21288
Zm00001d039712_P005	Protein NETWORKED 4A	46.933			0.816			0.993			0.945	1.217		1.158		0.952
Zm00001d030184_P002	CW7	45.535			1.016			0.942			0.909	0.927		0.895		0.965
Zm00001d033913_P001	Alba DNA/RNA-binding protein	34.398	0.971	0.968	0.854	0.965	1.058	1.117	1.036	1.085	0.956	1.124	0.123243	1.102	0.158517	0.98	0.7434
Zm00001d030421_P001	RING/U-box superfamily protein	39.835	0.863	0.617	0.686	0.999	1.032	0.987	1.048	0.895	0.968	1.393	0.075978	1.344	0.049598	0.965	0.46826
Zm00001d049665_P001	Probable calcium-binding protein CML13	16.639	1.288	1.192	1.385	1.046	1.034	1.075	1.084	0.984	0.94	0.816	0.0109207	0.778	0.0142388	0.953	0.32058
Zm00001d036642_P002	Zinc-binding protein	15.141	0.727	0.727		0.979	0.913		1.344	1.422		1.301	0.0171963	1.902	0.00192036	1.462	0.0136602
Zm00001d029393_P001	Cytochrome c oxidase subunit 6b-1	19.017	1.152	1.077	0.941	1.088	1.112	1.041	0.983	0.901	1.039	1.022	0.70694	0.922	0.3354	0.902	0.084379
Zm00001d043695_P001	Glycylpeptide N-tetradecanoyltransferase	49.2	1.097	1.365	1.139	1.006	0.821	0.978	1.094	0.86	1.145	0.779	0.054797	0.861	0.2416	1.105	0.42908
Zm00001d004023_P003	Sterile alpha motif (SAM) domain-containing protein	23.695	0.797			1.012			0.8			1.27		1.004		0.791
Zm00001d008230_P001	Magnesium-protoporphyrin IX monomethyl ester [oxidative] cyclase chloroplastic	47.22			0.942			1.003			1.128	1.065		1.197		1.125
Zm00001d022337_P001	Peptide deformylase 1A chloroplastic/mitochondrial	16.822		0.915			0.524			0.939		0.573		1.026		1.792
Zm00001d035308_P001	Protein DOWNY MILDEW RESISTANCE 6	37.868	1.187	0.792		0.78	0.856		0.772	0.936		0.827	0.49648	0.863	0.61652	1.044	0.7472
Zm00001d014734_P001	Arogenate dehydrogenase 1 chloroplastic	40.273	1.411	1.541	1.43	1.284	1.177	1.054	1.109	1.304	1.338	0.802	0.024475	0.856	0.07132	1.067	0.47302
Zm00001d020485_P002	Golgi SNAP receptor complex member 1	24.231		1.054	1.203		1.057	1.062		0.977	0.957	0.939	0.52626	0.857	0.150597	0.913	0.0132006
Zm00001d034659_P001	Nucleotide-diphospho-sugar transferases superfamily protein	38.802	0.774	1.632	0.743		0.779	1.12	1.94	0.691	1.204	0.905	0.90342	1.218	0.66944	1.346	0.61574
Zm00001d022418_P002	Retrovirus-related Pol polyprotein LINE-1	11.181		1.117			0.897			1.026		0.803		0.919		1.144
Zm00001d039613_P003	Has 43784 Blast hits to 26928 proteins in 1799 species Archae - 86 GN=BEST Arabidopsis thaliana protein match is: copper ion binding (TAIR:AT4G32610.1)	33.8	0.32			2.129			1.246			6.653		3.894		0.585
Zm00001d017036_P005	Glycerophosphodiester phosphodiesterase GDPDL3	81.246	1.456	1.386	1.448	1.216	1.184	1.135	1.105	1.182	1.073	0.824	0.00158456	0.783	0.00168028	0.95	0.21704
Zm00001d019217_P004	ABC2 homolog 13	60.967	0.856	0.929		0.821	0.803		0.835	0.799		0.91	0.15754	0.915	0.199479	1.006	0.83166
Zm00001d000153_P008	Diaminopimelate decarboxylase 2 chloroplastic	53.089	1.014	0.798	1.077	1.077	1.103	0.891	0.859	0.865	0.865	1.063	0.5995	0.896	0.38324	0.843	0.132959
Zm00001d010690_P001	Anthocyanidin 3-O-glucosyltransferase	49.999
Zm00001d031958_P002	Pyrimidine-specific ribonucleoside hydrolase rihA	35.086			0.768			0.796			1.113	1.036		1.449		1.398
Zm00001d049377_P014	General transcription factor 2-related zinc finger protein	52.223	1.032			0.988			1.125			0.957		1.09		1.139
Zm00001d018903_P001	Ribosomal protein L15	24.364	1.037	0.77	0.628	1.169	1.179	1.262	0.81	0.821	0.82	1.483	0.048399	1.007	0.86558	0.679	9.7878e-05
Zm00001d038066_P001	Annexin	39.042	1.333	1.11	1.306	1.389	1.352	1.417	1.161	1.234	1.243	1.109	0.147496	0.97	0.68238	0.875	0.0063554
Zm00001d039693_P062	Protein RST1	66.191
Zm00001d053822_P002	OTU-like cysteine protease family protein	23.244	1.195	1.013	1.019	1.021	1.009	1.039	0.873	1.027	0.987	0.951	0.47898	0.895	0.20364	0.941	0.27042
Zm00001d001820_P001	protochlorophyllide reductase1 leaf cDNA csu349 similar to plant protochlorophyllide reductase GN= pcr1	41.265			1.145			0.829			1.475	0.724		1.288		1.779
Zm00001d024567_P010	Protein PAF1 homolog	53.335	0.716			1.19			1.565			1.662		2.186		1.315
Zm00001d038914_P001	Sm-like protein LSM8	10.889	1.206	1.052	1.233	0.958	0.663	1.162	1.19	1.098	0.75	0.797	0.21896	0.87	0.35958	1.092	0.6865
Zm00001d028425_P009	Chloride conductance regulatory protein ICln	12.325	0.789	1.187	1.112	1.047	1.269	1.003	1.127	0.853	1.036	1.075	0.60322	0.977	0.92626	0.909	0.4262
Zm00001d021526_P002	Nucleoside diphosphate kinase family protein	16.83	0.829	0.883	0.903	0.912	0.8	0.81	0.821	0.791	0.847	0.964	0.48848	0.94	0.1312	0.975	0.63196
Zm00001d043686_P006	Survival protein SurE-like phosphatase/nucleotidase	41.407	1.043	1.11	1.051	0.988	1.057	0.942	1.024	0.98	1.007	0.932	0.141362	0.94	0.057323	1.008	0.81462
Zm00001d017350_P001	Transcription factor TCP21	22.761
Zm00001d053857_P007	T-complex protein 1 subunit eta	60.299	1.03	0.972	1.003	0.966	0.936	0.931	0.986	1	1.011	0.943	0.044443	0.997	0.90018	1.058	0.0143434
Zm00001d023534_P002	5-formyltetrahydrofolate cyclo-ligase1 GN= ftcl1	37.507			1.06			1.059			0.885	0.999		0.835		0.836
Zm00001d032972_P001	Pathogenesis-related thaumatin superfamily protein	29.835	1.827	1.607	1.41	0.897	1.048	1.021	1.199	1.261	1.391	0.612	0.0054012	0.795	0.059583	1.298	0.015775
Zm00001d023529_P001	abscisic acid stress ripening1 protects the major ARS protein in maize GN= aasr1	15.543	0.927	0.453	1.601	2.505	3.651	1.285	1.219	1.175	0.884	2.496	0.1158	1.1	0.60772	0.441	0.082198
Zm00001d032455_P001	Electron transfer flavoprotein-ubiquinone oxidoreductase mitochondrial	64.581	0.918	1.061	0.988	0.925	0.945	0.94	0.739	0.836	0.856	0.947	0.3391	0.819	0.032056	0.865	0.085716
Zm00001d052078_P002	26S protease regulatory subunit 7 homolog A	47.682	1.101	1.085	1.114	0.952	0.957	0.98	0.979	0.988	0.963	0.875	0.0003427	0.888	0.00037631	1.014	0.2924
Zm00001d034343_P005	Histidinol dehydrogenase chloroplastic	46.765			1.242			1.038			0.742	0.836		0.597		0.715
Zm00001d000403_P001	Protein binding protein	74.947	0.764	1.14		1.33	1.164		0.916	1.26		1.31	0.3059	1.143	0.63744	0.872	0.48496
Zm00001d030863_P004	GDP-Man:Man(3)GlcNAc(2)-PP-Dol alpha-12-mannosyltransferase	23.5			1.035			1.167			0.923	1.128		0.892		0.791
Zm00001d038003_P001	uncharacterized protein	17.744	1.167	1.196	0.979	0.834	0.822	0.874	0.856	0.628	0.997	0.757	0.0138959	0.742	0.105857	0.981	0.81192
Zm00001d051595_P004	ATP synthase subunit O mitochondrial	25.565	1.291	1.337	1.31	1.061	1.018	1.044	0.978	1.017	0.98	0.793	0.000121864	0.755	6.3177e-05	0.953	0.050097
Zm00001d005662_P002	Protein SCO1 homolog 2 mitochondrial	31.56			1.149			1.064			0.873	0.926		0.76		0.82
Zm00001d014664_P001	Protein CHLOROPLAST IMPORT APPARATUS 2	45.786	0.527			1.576			1.629			2.991		3.091		1.034
Zm00001d013242_P002	Ankyrin repeat family protein	24.151	0.838	0.649	0.869	0.952	0.949	0.835	0.901	1.061	0.601	1.161	0.199419	1.088	0.752	0.937	0.63012
Zm00001d028597_P005	Probable tRNA (guanine(26)-N(2))-dimethyltransferase 2	60.424	0.761			1.418			1.341			1.863		1.762		0.946
Zm00001d050865_P001	Phosphopantothenate--cysteine ligase 1	36.703		1.049			0.861			1.046		0.821		0.997		1.215
Zm00001d005253_P003	V-type proton ATPase subunit G1	12.248	0.604	0.748	0.699	1.062	1.138	1.078	1.211	1.241	1.208	1.598	0.0020769	1.784	0.0117202	1.117	0.0081963
Zm00001d003291_P003	transglutaminase21 GN= tgz21	26.948	1.216	0.906	1.192	0.995	1.037	1.04	0.89	1.064	0.928	0.927	0.55584	0.87	0.28734	0.938	0.29856
Zm00001d001785_P001	C2 calcium/lipid-binding plant phosphoribosyltransferase family protein	114.92	0.957	1.183	1.008	0.876	0.936	0.996	1.313	1.057	1.004	0.892	0.20516	1.072	0.55726	1.202	0.119524
Zm00001d029142_P006	Nuclear pore complex protein NUP93A	95.356	0.698			1.01			0.963			1.447		1.38		0.953
ZeamMp159	uncharacterized protein	17.308	0.757	0.908	1	1.24	1.004	0.971	1.113	1.112	0.88	1.206	0.167899	1.165	0.24606	0.966	0.76656
Zm00001d017866_P003	Aspartyl protease AED1	21.881	0.557	0.425	0.533	0.398	0.361	0.622	0.66	0.396	0.628	0.912	0.57246	1.112	0.6568	1.219	0.43434
Zm00001d049522_P001	Vacuolar protein sorting-associated protein 45 homolog	71.769		1.042			1.123			0.893		1.078		0.857		0.795
Zm00001d017979_P002	Dynamin-2A	100.31	0.822	0.857	0.723	1.088	1.049	1.044	1.093	1.035	1.097	1.324	0.0058217	1.343	0.0055209	1.014	0.58554
Zm00001d052321_P001	Tautomerase/MIF superfamily protein	12.163	1.139	1.078	0.963	0.863	0.926	1.025	1.058	0.938	0.987	0.885	0.156462	0.938	0.35806	1.06	0.38322
Zm00001d017401_P002	Hsp70-Hsp90 organizing protein 3	75.073	1.045	1.056	1.046	0.976	0.978	0.977	0.954	1.05	1.028	0.931	3.5353e-05	0.963	0.32324	1.034	0.37378
Zm00001d027962_P001	Vacuolar protein-sorting-associated protein 37 homolog 1	29.921	1.092	1.046	0.813	1.001	0.904	0.99	0.913	0.978	1.019	0.981	0.90816	0.986	0.9477	1.005	0.91486
Zm00001d003200_P005	S-adenosyl-L-methionine-dependent methyltransferases superfamily protein	37.214	0.146			1.162			1.349			7.959		9.24		1.161
Zm00001d010919_P001	PTI1-like tyrosine-protein kinase 3	38.865	1.038	0.756	0.847	1.176	1.179	1.097	1.02	1.018	1.088	1.307	0.044839	1.184	0.137021	0.906	0.036885
Zm00001d019981_P005	Ubiquitin-conjugating enzyme E2 30	16.679		1.115			0.924			0.973		0.829		0.873		1.053
Zm00001d030348_P002	Alcohol dehydrogenase-like 3	42.22	0.378			0.949			1.106			2.511		2.926		1.165
Zm00001d012254_P003	Putative patellin family protein	61.328		0.74	0.617		1.394	2.246		2.017	1.422	2.682	0.063655	2.534	0.043021	0.945	0.89576
Zm00001d042541_P003	lipoxygenase2 GN= lox2	98.163	0.803	0.821	0.838	0.959	0.968	0.961	1.278	1.266	1.255	1.173	0.00022288	1.543	2.7028e-06	1.315	6.6766e-07
Zm00001d009060_P001	Probable beta-D-xylosidase 5	89.473	0.906			0.892			0.874			0.985		0.965		0.98
Zm00001d046255_P031	Nuclear poly(A) polymerase 2	30.941		1.009			1.17			1.116		1.16		1.106		0.954
Zm00001d002185_P002	Histone-lysine N-methyltransferase ATXR2	51.995			1.087			1.005			0.908	0.925		0.835		0.903
Zm00001d019920_P009	Protein SMG7	81.267	0.142		0.147	0.807		0.819	4.369		4.254	5.626	0.000119271	29.837	4.0693e-05	5.303	8.1738e-05
Zm00001d028463_P002	uncharacterized protein	13.502			0.33			1.011			0.888	3.064		2.691		0.878
Zm00001d041626_P001	AP-3 complex subunit delta	101.36		0.266			1.188			0.95		4.466		3.571		0.8
Zm00001d004136_P001	Glutathione S-transferase family protein	45.459	0.885	0.928	0.877	1.046	1.056	1.054	1.214	1.102	1.119	1.173	0.00084009	1.277	0.0021789	1.088	0.1089
Zm00001d017288_P001	Aquaporin PIP2-4	30.322	0.542	0.441	0.498	0.486	0.406	0.477	0.427	0.551	0.523	0.924	0.39754	1.014	0.91566	1.096	0.40682
Zm00001d001812_P001	Rubisco Assembly Factor 1 Rubisco Accumulation Factor1 GN= raf1	50.918		0.809	0.925		1.283	1.304		1.031	1.013	1.492	0.027005	1.179	0.132464	0.79	0.0025772
Zm00001d028711_P002	MAP kinase3 transcript and protein activity upregulated by ABA and H2O2 GN= mpk3	37.167			1.068			1.071			0.885	1.003		0.829		0.826
Zm00001d029561_P001	Probable ubiquitin conjugation factor E4	115.72	0.985		1.028	0.989		0.868	1.128		0.804	0.923	0.35222	0.96	0.77738	1.04	0.8936
Zm00001d033110_P001	Inositol-phosphate phosphatase	33.811	1.048	0.804	1.143	1.084	1.121	1.023	1.157	1.34	1.188	1.078	0.4792	1.23	0.133535	1.142	0.067024
Zm00001d029248_P001	uncharacterized protein	24.208	0.964	1.001		1.025	1.008		1.048	1.013		1.035	0.23918	1.049	0.20052	1.014	0.5479
Zm00001d010171_P002	Soluble inorganic pyrophosphatase 1	25.588	0.83	0.961	0.691	1.064	1.027	1.167	1.018	1.03	1.19	1.313	0.052898	1.305	0.064921	0.994	0.9139
Zm00001d000257_P005	Transmembrane CLPTM1 family protein	36.827	1.323	0.452		0.547	1.635		1.129	0.65		1.229	0.81754	1.002	0.88098	0.815	0.88668
Zm00001d003306_P001	Bowman-Birk type bran trypsin inhibitor	19.419	1.632	0.813	1.324	1.589	1.104	1.471	1.774	1.03	1.442	1.105	0.6134	1.127	0.63098	1.02	0.97306
Zm00001d025745_P001	Ribosome recycling factor	27.773	0.672	0.482	0.976	0.889	1.014	0.997	1.056	1.148	1.002	1.362	0.169242	1.505	0.096736	1.106	0.154219
Zm00001d002184_P001	Peroxisome biogenesis protein 22	26.908	0.852		0.807	1.22		1.121	0.922		1.008	1.411	0.020715	1.163	0.101963	0.824	0.088101
Zm00001d044287_P001	Ribosomal protein L19	24.114	1.352	1.186	1.285	1.03	1.079	1.033	0.688	1.049	0.933	0.822	0.0089238	0.698	0.046962	0.85	0.29526
Zm00001d019062_P001	membrane H(+)-ATPase3 GN= mha3	65.626
Zm00001d013283_P003	Transducin/WD40 repeat-like superfamily protein	30.165	1.057			0.921			0.931			0.871		0.881		1.011
Zm00001d039368_P003	GDSL esterase/lipase	47.762	1.318		1.463	1.302		1.506	0.974		1.023	1.01	0.934	0.718	0.029195	0.711	0.047822
Zm00001d005350_P008	ENTH/VHS family protein	95.881		0.867			1.15			0.958		1.326		1.105		0.833
Zm00001d018412_P001	50S ribosomal protein L9 chloroplastic	9.9326	0.861	0.891	0.976	0.934	0.913	0.997	0.939	0.823	0.63	1.043	0.4072	0.877	0.30898	0.841	0.197383
Zm00001d028010_P003	conserved oligomeric Golgi complex component-related / COG complex component-related	60.165	0.619		0.712	1.031		1.035	0.987		1	1.552	0.099981	1.493	0.029082	0.962	0.02926
Zm00001d046945_P001	Vacuolar sorting receptor 7	69.626	1.164	1.039	0.901	1.004	1.024	1.119	1.124	1.152	1.208	1.014	0.8347	1.122	0.192896	1.107	0.060484
ZeamMp185	uncharacterized protein	24.892	0.729	0.993	0.914	1.27	1.092	1.002	1.112	1.198	1.104	1.276	0.098804	1.295	0.050118	1.015	0.811
Zm00001d042624_P001	Probable pectinesterase/pectinesterase inhibitor 51	35.022	0.858	0.868	0.809	0.681	0.738	0.803	0.714	0.69	0.717	0.877	0.063124	0.837	0.0020415	0.955	0.417
Zm00001d040279_P006	topless-related1 GN= tpl1	119.82		1.054			1.371			0.977		1.301		0.927		0.713
Zm00001d041746_P001	Pinoresinol reductase 2	29.672	0.379	0.268	0.413	0.456	0.409	0.563	0.359	0.521	0.587	1.347	0.132221	1.384	0.181461	1.027	0.93648
Zm00001d035156_P004	Glyceraldehyde-3-phosphate dehydrogenase 2%2C cytosolic	36.541			1.293			0.976			1.079	0.755		0.834		1.106
Zm00001d017216_P001	Polyribonucleotide nucleotidyltransferase 2 mitochondrial	106.29	1.025	0.969	0.943	0.925	0.986	1.124	1.183	1.013	1.011	1.033	0.6546	1.092	0.21022	1.057	0.51184
Zm00001d040140_P001	Nuclear poly(A) polymerase 1	20.201			0.913			1.176			1.453	1.288		1.591		1.236
Zm00001d021170_P017	Inositol 134-trisphosphate 5/6-kinase 4	28.756			1.415			1.203			1.179	0.85		0.833		0.98
Zm00001d012007_P002	CBS domain-containing protein CBSCBSPB1	13.739	0.661			1.013			1.009			1.533		1.526		0.996
Zm00001d028671_P019	ABC transporter B family member 6	113.87	1.027			1.157			1.034			1.127		1.007		0.894
Zm00001d032114_P001	D-3-phosphoglycerate dehydrogenase 2 chloroplastic	69.424	1.22	1.35	1.208	1.186	1.285	1.213	1.185	1.064	1.155	0.975	0.5977	0.901	0.096761	0.924	0.119816
Zm00001d034406_P007	25.3 kDa vesicle transport protein	18.662	1.136	1.09		1.027	1.06		1.009	1.116		0.938	0.131803	0.955	0.4752	1.018	0.77932
Zm00001d019150_P001	Pathogenesis-related thaumatin superfamily protein	30.859		0.862	1.07		1.016	0.887		0.996	0.459	0.985	0.93588	0.753	0.47486	0.765	0.47914
Zm00001d006127_P003	Probable transcription factor PosF21	39.349	1.033			1.11			1.04			1.075		1.007		0.937
Zm00001d043727_P001	farnesyl diphosphate synthase3 terpene based defense (Richter et al 2015) GN= fps3	40.805	0.48	0.474	0.3	0.709	0.747	0.802	1.354	1.246	1.706	1.801	0.0184566	3.434	0.0023213	1.907	0.0031622
Zm00001d051664_P001	2-oxoglutarate (2OG) and Fe(II)-dependent oxygenase superfamily protein	39.244	1.009	1.1	1.094	0.968	0.983	0.926	0.959	1.015	1.087	0.898	0.032198	0.956	0.37242	1.064	0.20564
Zm00001d024159_P001	Bifunctional dethiobiotin synthetase/78-diamino-pelargonic acid aminotransferase mitochondrial	90.239		1.136	1.095		0.852	0.862		0.764	0.821	0.768	0.0053171	0.71	0.0136412	0.925	0.162898
Zm00001d015464_P001	Calmodulin binding protein	62.887			0.935			1.037			0.869	1.109		0.929		0.838
Zm00001d014032_P001	Protein LIGHT-DEPENDENT SHORT HYPOCOTYLS 3	22.484		0.884	0.635		1.061	1.179		0.868	0.96	1.475	0.147365	1.203	0.37164	0.816	0.108324
Zm00001d013755_P002	Thioredoxin superfamily protein	26.87	1.09	1.039		0.87	0.903		0.92	0.905		0.833	0.026441	0.857	0.026061	1.029	0.2896
Zm00001d001960_P002	Naringenin2-oxoglutarate 3-dioxygenase	29.477	0.542	0.47		0.84	0.925		0.958	1.269		1.744	0.022984	2.201	0.038356	1.262	0.27098
Zm00001d023918_P001	Purple acid phosphatase 10	55.53	0.861			0.911			0.785			1.058		0.912		0.862
Zm00001d016130_P002	GDSL esterase/lipase	31.42	0.436	0.627	0.448	1.354	1.429	1.376	1.242	1.172	1.28	2.752	0.0129428	2.445	0.00162116	0.888	0.0173432
Zm00001d032526_P006	DEAD-box ATP-dependent RNA helicase 8	56.263	1.066	0.884	0.908	1.008	0.966	1.146	0.902	0.869	1	1.092	0.3188	0.97	0.70554	0.888	0.150599
Zm00001d035136_P002	succinate dehydrogenase7 GN= sudh7	31.159	1.084	0.99	1.008	0.895	0.962	0.91	0.901	0.952	0.858	0.898	0.038139	0.88	0.034801	0.98	0.60402
Zm00001d042272_P009	Histone-lysine N-methyltransferase H3 lysine-9 specific SUVH4	34.579	0.592			0.916			1.112			1.547		1.878		1.214
Zm00001d014463_P001	early nodulin-like protein 9	26.415			1.137			0.858			1.048	0.755		0.922		1.221
Zm00001d034781_P001	G-type lectin S-receptor-like serine/threonine-protein kinase	90.929		1.07			1.082			1.179		1.011		1.102		1.09
Zm00001d037601_P001	Serine/threonine-protein phosphatase	33.915	1.182	1.116	1.208	1.065	1.02	1.071	0.937	0.939	0.984	0.9	0.020537	0.816	0.0020428	0.906	0.0113552
Zm00001d031908_P001	Superoxide dismutase [Cu-Zn]	20.895	1.057	0.9	0.961	0.991	1.015	1.029	0.748	0.826	0.949	1.04	0.43688	0.865	0.150244	0.831	0.113437
Zm00001d018523_P014	26S proteasome non-ATPase regulatory subunit 12 homolog B	50.525	1.114	1.252	1.12	1.086	0.876	1.084	0.93	1.054	0.957	0.874	0.162039	0.844	0.033982	0.966	0.7158
Zm00001d036370_P001	Chitinase2	32.171	0.873	0.468	0.489	0.522	0.815	0.555	0.706	0.423	0.821	1.034	0.83104	1.066	0.82188	1.031	0.96146
Zm00001d050380_P003	regulator of chromosome condensation3 GN= rcc3	36.113	0.911	1.038	1.014	1.038	1.078	0.836	0.888	0.779	0.889	0.996	0.93056	0.863	0.0675	0.866	0.197337
Zm00001d044555_P014	Calcium permeable stress-gated cation channel 1	34.793		1.128	1.128		1.214	1.062		0.831	0.844	1.009	0.93048	0.742	0.00067925	0.736	0.045603
Zm00001d029133_P009	Nuclear cap-binding protein subunit 1	99.196	1.014	1.055	0.942	0.991	1.022	1.038	0.962	0.985	0.941	1.013	0.7142	0.959	0.3172	0.947	0.044325
Zm00001d007232_P001	dentin sialophosphoprotein-related	61.932	0.667	0.765	0.68	1.344	1.289	1.244	0.787	1.049	1.138	1.836	0.00022421	1.408	0.050235	0.767	0.072278
Zm00001d009156_P001	Protein ABC transporter 1 mitochondrial	64.319	1.028	0.985	0.946	0.924	1.057	1.095	0.96	1.105	1.114	1.04	0.55468	1.074	0.26412	1.033	0.66268
Zm00001d006149_P001	S-adenosyl-L-methionine-dependent methyltransferases superfamily protein	37.163		0.999	1.073		1.159	1.218		1.043	1.059	1.147	0.087055	1.014	0.72144	0.884	0.042003
Zm00001d031203_P001	alpha/beta-Hydrolases superfamily protein	36.297	0.977	0.936	1.069	0.993	0.994	0.939	0.966	0.864	1.039	0.981	0.70346	0.962	0.57992	0.981	0.71628
Zm00001d030620_P003	Protein OS-9 homolog	33.615	1.179	1.203		0.961	0.97		0.923	0.978		0.811	0.0027833	0.798	0.0179023	0.984	0.63864
Zm00001d014126_P001	UDP-glycosyltransferase 86A2	53.87	1.141	1.096	1.21	0.923	0.932	0.956	1.046	1.025	1.073	0.815	0.0026603	0.912	0.04466	1.118	0.0026841
Zm00001d016486_P005	brevis plant1 short internodes, short plant GN= bv1	95.71		0.747	0.441		0.962	1.092		1.019	1.076	1.729	0.165782	1.763	0.151282	1.02	0.7857
Zm00001d034727_P007	Pectin lyase-like superfamily protein	26.963		1.138	1.176		0.965	0.981		0.912	0.903	0.841	0.0110756	0.784	0.0049583	0.933	0.0184648
Zm00001d026619_P003	Pyruvate kinase	56.566	0.956			0.87			0.929			0.91		0.972		1.068
Zm00001d031291_P002	Elongator complex protein 2	44.558		1.123	1.178		0.923	1.132		1.027	1.011	0.893	0.37726	0.886	0.040557	0.992	0.97832
Zm00001d045864_P009	65-kDa microtubule-associated protein 1	52.515		1.096			0.973			1.105		0.888		1.008		1.136
Zm00001d048358_P004	aconitase3 electrophoretic mobility GN= aco3	106.79	1.188	1.232	1.223	0.954	0.988	1.004	1.077	0.988	0.983	0.809	0.00034211	0.837	0.0048026	1.035	0.37224
Zm00001d024471_P002	uncharacterized protein	7.092	1.068	1.038	0.873	1.158	0.98	0.987	0.902	0.901	0.807	1.049	0.59002	0.876	0.15032	0.835	0.053484
Zm00001d028088_P004	Ubiquitin system component Cue protein	94.558	0.867		0.699	0.975	1.812	1.121	1.031	0.948	1.03	1.664	0.15774	1.281	0.063898	0.77	0.35658
Zm00001d025165_P003	Nuclear transport factor 2 (NTF2) family protein with RNA binding (RRM-RBD-RNP motifs) domain	52.19	0.77	0.661	0.373	1.097	1.13	1.211	1.099	1.166	1.028	1.906	0.090342	1.825	0.044658	0.958	0.40396
Zm00001d015182_P001	Bifunctional coenzyme A synthase	23.783			0.336			1.133			1.153	3.372		3.432		1.018
Zm00001d036448_P004	Putative MAP kinase family protein	40.565			0.982			1.017			1.086	1.036		1.106		1.068
Zm00001d044224_P001	uncharacterized protein	31.982			0.589			0.98			1.075	1.664		1.825		1.097
Zm00001d013542_P005	argonaute108 GN= ago108	45.942		0.909	0.9		0.937	0.873		0.871	0.922	1.001	0.9988	0.991	0.77854	0.991	0.8579
Zm00001d029206_P001	Protein DGS1 mitochondrial	65.313	1.125	1.127	1.068	1.012	0.971	0.884	0.835	0.903	1.094	0.864	0.027664	0.853	0.114715	0.988	0.85692
Zm00001d030345_P001	uncharacterized protein	23.927	1.365	1.244	1.375	1.044	1.091	0.98	0.913	0.851	0.95	0.782	0.0053627	0.681	0.00108231	0.871	0.036963
Zm00001d012606_P001	Pentatricopeptide repeat-containing protein mitochondrial	50.018	0.891	0.788	0.742	1.29	1.404	1.386	1.033	1.078	1.083	1.685	0.00094142	1.319	0.0074641	0.783	0.00128481
Zm00001d018144_P004	ARM repeat superfamily protein	49.214	1.076	1.136	0.989	0.948	0.942	0.973	0.953	1.06	1.028	0.894	0.056897	0.95	0.37884	1.062	0.147419
Zm00001d041639_P001	Splicing factor U2af small subunit A	19.728	0.465			1.028			1.073			2.211		2.308		1.044
Zm00001d052842_P001	Caffeoyl-CoA O-methyltransferase 1	27.287	1.269	1.344	1.339	1.158	0.842	1.224	1.107	1.037	0.994	0.816	0.2083	0.794	0.0031419	0.973	0.90734
Zm00001d005638_P006	Retinol dehydrogenase 13	106.63		1.101			1.181			0.952		1.073		0.865		0.806
Zm00001d042723_P001	Omega-hydroxypalmitate O-feruloyl transferase	47.696		1.678			0.785			1.074		0.468		0.64		1.368
Zm00001d043955_P001	Eukaryotic translation initiation factor 3 subunit D	64.885	0.989	0.89	1.033	0.948	1.019	0.934	0.911	0.898	0.847	0.996	0.9627	0.912	0.141421	0.916	0.06538
Zm00001d041201_P001	HIPL1 protein	73.74	0.964	1.064	1.122	1.172	1.153	1.178	1.125	1.125	0.961	1.112	0.137859	1.019	0.80206	0.917	0.23214
Zm00001d034714_P001	Non-specific phospholipase C1	60.602	0.938	0.67	0.746	1.017	0.992	1.17	1.18	1.152	1.136	1.35	0.051125	1.473	0.057722	1.091	0.163536
Zm00001d001999_P008	Galactose mutarotase-like superfamily protein	37.439	1.027	1.106	1.061	0.926	0.847	0.923	0.949	0.99	0.881	0.844	0.0093809	0.883	0.0359	1.046	0.37614
Zm00001d040190_P001	hydroxyproline-rich glycoprotein family protein	33.358	1.113	1.141	1.081	1.001	0.977	0.968	0.934	0.921	0.847	0.883	0.0026032	0.81	0.0035235	0.917	0.053138
Zm00001d014779_P001	Putative membrane lipoprotein	6.8097		1.125	1.131		0.884	0.828		1.082	1.006	0.759	0.013815	0.926	0.166002	1.22	0.055825
Zm00001d044285_P004	calcineurin B-like10 GN= cbl10	23.671			1.411			0.88			0.824	0.624		0.584		0.936
Zm00001d043544_P001	UDP-glycosyltransferase 88A1	54.32			0.529			0.521	1.675		2.33	0.985		3.785		3.844
Zm00001d002677_P001	uncharacterized protein	26.642	0.916	0.986	0.968	0.894	0.931	0.945	0.855	0.829	0.795	0.965	0.27128	0.864	0.0087034	0.895	0.0143197
Zm00001d042091_P001	Flowering time control protein FY	61.311	0.55	0.644	0.656	1.068	0.999	0.965	1.046	1.18	1.124	1.639	0.00143728	1.811	0.00083706	1.105	0.096541
Zm00001d016835_P006	Ligatin	66.839	0.898			1.101			1.108			1.226		1.234		1.006
Zm00001d020741_P001	Gibberellin receptor GID1L2	41.076	0.941			0.917			0.911			0.974		0.968		0.993
Zm00001d043508_P003	Tryptophan--tRNA ligase chloroplastic/mitochondrial	23.85		1.162			1.365			0.962		1.175		0.828		0.705
Zm00001d002772_P001	Blue copper protein	18.508	1.371	1.64		1.499	1.446		1.311	1.158		0.978	0.85964	0.82	0.21332	0.838	0.110297
Zm00001d054069_P001	Tetratricopeptide repeat (TPR)-like superfamily protein	64.158	0.793	0.855	0.788	1.075	1.079	1.079	0.824	0.828	0.772	1.327	0.0084419	0.995	0.8974	0.75	0.0060839
Zm00001d049929_P006	Dihydroxy-acid dehydratase chloroplastic	63.261	1.117	1.146	1.052	0.942	0.993	0.981	0.764	0.93	0.945	0.88	0.0129623	0.796	0.033482	0.905	0.21214
Zm00001d046587_P009	transducin family protein / WD-40 repeat family protein	19.457	0.901			1.103			0.979			1.224		1.087		0.888
Zm00001d039841_P001	Putative 4-hydroxy-4-methyl-2-oxoglutarate aldolase 2	17.952	1.148	0.96	1.031	1.027	1.012	1	0.888	1.093	1.021	0.968	0.62866	0.956	0.60022	0.988	0.82068
Zm00001d041415_P003	P-loop containing nucleoside triphosphate hydrolases superfamily protein	31.364	1.146	0.995	0.881	1.054	1.115	0.968	1.019	0.943	1	1.038	0.6564	0.98	0.86126	0.944	0.29968
Zm00001d022585_P002	DNA replication complex GINS protein PSF2	23.69			0.976			0.995			0.879	1.019		0.901		0.883
Zm00001d020659_P001	Expressed protein	16.272			0.865			1.002			1.07	1.158		1.237		1.068
Zm00001d036240_P002	Probable beta-13-galactosyltransferase 14	39.437			0.643			0.762			0.884	1.185		1.375		1.16
Zm00001d017751_P001	Pentatricopeptide repeat-containing protein chloroplastic	89.647		0.929	0.901		1.006	1.183		0.852	0.842	1.196	0.166459	0.926	0.042365	0.774	0.089455
Zm00001d011742_P038	SUPPRESSOR OF ABI3-5	95.092	0.726	0.749	0.689	1.159	1.07	1.178	1.037	0.854	1.084	1.574	0.00029737	1.375	0.0153005	0.873	0.151283
Zm00001d003281_P001	Cellulase (glycosyl hydrolase family 5) protein	62.806	0.963	0.638		1.271	1.083		1.106	1.165		1.47	0.20938	1.418	0.21624	0.965	0.73252
Zm00001d053305_P001	Steroid nuclear receptor ligand-binding	40.782			0.536			1.235			1.1	2.304		2.052		0.891
Zm00001d008739_P001	2-hydroxyacyl-CoA lyase	71	1.041	1.06	1.093	1.081	1.115	1.041	1.257	1.272	1.297	1.013	0.61808	1.198	0.00043713	1.182	0.00155924
Zm00001d050428_P002	glyceraldehyde-3-phosphate deHaseN1 cDNA sequence GN= gpn1	53.284	1.022	0.908	0.912	0.827	0.828	0.87	0.78	0.82	0.82	0.888	0.050035	0.852	0.0193629	0.958	0.146256
Zm00001d043317_P001	Mitochondrial glycoprotein family protein	27.168	0.982	0.862	0.753	1.124	1.051	1.044	0.876	0.933	0.978	1.24	0.051722	1.073	0.41486	0.866	0.021885
Zm00001d019055_P001	Sec14p-like phosphatidylinositol transfer family protein	18.276		0.802			1.03			0.98		1.284		1.222		0.951
Zm00001d044329_P001	S-adenosyl-L-methionine-dependent methyltransferases superfamily protein	10.966	0.928	0.989	0.691	0.946	0.906	1.033	1.198	0.998	1.235	1.106	0.39566	1.316	0.09424	1.189	0.090964
Zm00001d021938_P001	Putative polyol transporter 1	54.255	1.294	1.231		0.931	1.125		0.952	0.873		0.814	0.165484	0.723	0.022816	0.888	0.38218
Zm00001d016365_P003	dihydrolipoamide S-acetyltransferase1 cDNA sequence GN= dla1	45.18		1.206	1.097		1.017	1.088		1.258	1.124	0.914	0.26426	1.034	0.69552	1.132	0.20278
Zm00001d032396_P001	SAM-dependent methyltransferase	26.13
Zm00001d037538_P005	Arginine--tRNA ligase chloroplastic/mitochondrial	67.972	0.864	1.134	1.021	0.967	1.101	0.992	0.829	1.009	0.985	1.014	0.8481	0.935	0.55484	0.923	0.32318
Zm00001d029353_P002	benzoxazinone synthesis12 GN= bx12	28.724		0.442			1.123			1.428		2.541		3.231		1.272
Zm00001d046836_P003	Sas10/Utp3/C1D family	37.401
Zm00001d034949_P001	GTP-binding protein homolog1 leaf cDNA csu108, partial sequence similar to Arabidopsis GTP binding protein, RHA1 GN= gbp1	27.086	0.277	0.784	0.216	1.272	1.007	1.057	1.141	1.267	1.419	2.612	0.049122	2.997	0.087737	1.147	0.21874
Zm00001d036215_P003	MAP kinase7 GN= mpk7	45.054	0.929	1.008		1.064	1.086		0.939	0.95		1.11	0.129756	0.975	0.61554	0.879	0.0081796
Zm00001d026593_P005	Putative homeodomain-like transcription factor superfamily protein	21.355	0.825			1.01			1.311			1.224		1.589		1.298
Zm00001d017271_P008	Adenosine kinase 2	37.106	1.17	1.23	1.143	0.953	0.935	0.968	1.049	1.078	1.034	0.806	0.00083786	0.892	0.010199	1.107	0.0030369
Zm00001d017352_P011	nitrilase1 GN= nit1	21.013	1.196			1.136			1.182			0.95		0.988		1.04
Zm00001d026690_P001	Serine/threonine-protein kinase SRK2A	41.838
Zm00001d021621_P024	Polynucleotidyl transferase ribonuclease H fold protein with HRDC domain	31.252		0.876	0.766		1.086	0.889		1.119	1.132	1.203	0.27018	1.371	0.042116	1.14	0.30828
Zm00001d053627_P003	Peptidase C13 family	29.458			1.083			0.871			1.031	0.804		0.952		1.184
Zm00001d047539_P022	Putative RNA-binding zinc finger family protein	26.538			0.615			1.111			1.104	1.807		1.795		0.994
Zm00001d011213_P009	Protein ROOT HAIR DEFECTIVE 3	87.997		1.163	0.838		0.921	1.275		0.827	1.21	1.097	0.72552	1.018	0.96286	0.928	0.77958
Zm00001d041831_P002	DNA binding protein	39.138	1.338	0.687	0.585	0.788	1.415	1.194	0.642	1.033	1.085	1.302	0.38098	1.057	0.7651	0.812	0.44324
Zm00001d049277_P001	NAD(P)-binding Rossmann-fold superfamily protein	32.222		0.962			1.125			1.102		1.169		1.146		0.98
Zm00001d028513_P003	PYM protein	20.035	1.088		0.809	1.237		0.995	0.873		0.896	1.177	0.45808	0.933	0.72986	0.793	0.174616
Zm00001d034799_P007	RNA-binding ASCH domain protein	10.829	1.266		1.271	1.177		1.208	1.358		1.416	0.94	0.042318	1.093	0.05134	1.163	0.025584
Zm00001d004731_P002	Aldehyde dehydrogenase	52.183	0.596	0.611	0.691	0.95	0.934	0.917	1.365	1.22	1.34	1.476	0.00112229	2.068	0.0002219	1.401	0.00074478
Zm00001d046183_P001	50S ribosomal protein L1	44.367	0.972	1.002	1.039	0.894	1.048	0.943	1.082	0.888	0.964	0.958	0.42114	0.974	0.65118	1.017	0.84182
Zm00001d046214_P003	Serine/threonine protein phosphatase 2A 55 kDa regulatory subunit B beta isoform	57.092	1.124	1.133	1.077	0.926	0.986	0.852	1.06	0.773	1.032	0.829	0.0138249	0.859	0.25574	1.037	0.81214
Zm00001d020732_P001	Probable carboxylesterase 2	32.861		1.219	1.359		0.871	0.979		0.857	1.093	0.718	0.053204	0.756	0.165717	1.054	0.76098
Zm00001d011966_P004	Ubiquitin carrier protein%3B Ubiquitin-conjugating enzyme E2-22 kDa	21.388	0.836	0.887	0.902	1.024	1.029	1.05	0.961	1.116	1.006	1.182	0.0023031	1.174	0.033056	0.994	0.861
Zm00001d031899_P002	malate dehydrogenase6 mesophyll cells, C4 photosynthesis GN= mdh6	46.786	0.958			0.976			0.867			1.019		0.905		0.888
Zm00001d034675_P003	Ras-related protein RABA2c	23.678	1.003	0.609	1.023	0.922	0.976	0.871	1.068	1.101	0.95	1.051	0.6847	1.184	0.33192	1.126	0.101245
Zm00001d047203_P001	uncharacterized protein	28.837	0.954	1.1	0.913	1.27	1.29	1.283	0.815	0.764	0.835	1.295	0.043419	0.814	0.030582	0.628	6.2745e-05
Zm00001d027548_P001	sterol methyl transferase2 cDNA sequences, SSR umc1547 GN= smt2	41.281	1.485	0.806	1.584	1.558	2.119	1.523	1.741	2.287	1.795	1.342	0.24726	1.503	0.129139	1.12	0.44064
Zm00001d013597_P003	Protein CDC73 homolog	42.253	0.913	1.018	1.038	1.152	1.019	1.048	1.047	1.168	0.998	1.084	0.21134	1.082	0.2704	0.998	0.96648
Zm00001d038459_P002	Putative VHS/GAT domain containing family protein	40.831	0.644			0.997			1.113			1.548		1.728		1.116
Zm00001d053932_P003	NAD(P)-linked oxidoreductase superfamily protein	34.667	1.038	0.965	0.977	0.813	0.833	0.788	0.891	0.815	0.998	0.817	0.00186465	0.907	0.18606	1.111	0.168581
Zm00001d044759_P001	Alpha-mannosidase 2	133.68	1.026	1.051	0.957	0.99	1.003	1.086	0.994	1.044	1.022	1.015	0.73452	1.009	0.78656	0.994	0.87166
Zm00001d016406_P022	NSP (nuclear shuttle protein)-interacting GTPase	60.596	0.993	0.896	0.821	1.233	1.226	1.177	1.042	0.977	0.983	1.342	0.0064408	1.108	0.148236	0.826	0.00160072
Zm00001d027309_P005	Phosphoglucan phosphatase DSP4 chloroplastic	41.85		1.135	1.041		1.019	0.992		0.904	1.014	0.924	0.22694	0.881	0.21944	0.954	0.4941
Zm00001d009960_P001	HXXXD-type acyl-transferase family protein	46.656	0.348		0.565	1.069		1.133	1.253		1.309	2.412	0.065118	2.806	0.048799	1.163	0.053025
Zm00001d048947_P001	pathogenesis-related protein3 GN= prp3	18.352	0.554	0.519	0.485	0.621	0.596	0.543	1.644	1.552	1.705	1.13	0.092097	3.146	1.8482e-05	2.785	2.4488e-05
Zm00001d025542_P002	Gamma-glutamylcyclotransferase 2-3	21.541	0.312			1.011			1.653			3.24		5.298		1.635
Zm00001d001788_P015	K(+) efflux antiporter 2 chloroplastic	106.21	0.943			1.128			1.11			1.196		1.177		0.984
Zm00001d039816_P002	Aspartate--tRNA ligase chloroplastic/mitochondrial	57.023		0.732			1.139			0.985		1.556		1.346		0.865
Zm00001d019115_P051	Cleavage and polyadenylation specificity factor (CPSF) A subunit protein	137.27			0.923			1.01			1.027	1.094		1.113		1.017
Zm00001d003640_P003	Glutathione S-transferase TCHQD	31.085	0.965	1.04	1.01	1.03	0.918	0.907	0.782	0.82	0.767	0.947	0.29256	0.786	0.00121789	0.83	0.0147759
Zm00001d021147_P004	Proteasome subunit beta type-4	28.867	1.092	1.254	1.187	0.98	0.915	0.961	0.976	0.883	0.976	0.808	0.0093768	0.802	0.0136775	0.993	0.84672
Zm00001d019726_P001	Uclacyanin-3	17.619			0.517			0.784			1.552	1.516		3.002		1.98
Zm00001d011504_P003	V-type proton ATPase subunit E3	26.629	1.028	1.415	1.439	1.005	1.053	1.132	0.717	1	0.858	0.822	0.18034	0.663	0.048696	0.807	0.095376
Zm00001d034931_P007	COP1-interacting protein-related	131.75			0.583			1.443			0.97	2.475		1.664		0.672
Zm00001d016411_P001	ADPATP carrier protein 1 chloroplastic	70.699	0.988	1.072	1.033	1.089	0.852	1.071	1.001	0.943	0.92	0.974	0.71758	0.926	0.088825	0.951	0.6173
Zm00001d047245_P002	Transducin/WD40 repeat-like superfamily protein	48.096			0.855			1.058			0.785	1.237		0.918		0.742
Zm00001d052239_P001	Membrane-anchored ubiquitin-fold protein 6	13.021	1.014			1.041			1.258			1.027		1.241		1.208
Zm00001d046221_P050	ATP/GTP-binding protein family	139.48	0.598	0.706	0.708	1.252	1.207	1.159	1.084	1.142	1.136	1.798	0.00060321	1.671	0.00089706	0.929	0.057923
Zm00001d027876_P005	Omega-amidase chloroplastic	24.517	0.852	0.865	0.779	0.731	0.826	0.877	0.698	0.842	0.829	0.975	0.68986	0.949	0.46868	0.973	0.74758
Zm00001d034050_P002	Mitochondrial substrate carrier family protein	34.835		0.932	0.969		0.928	0.961		1.335	1.167	0.994	0.83222	1.316	0.060058	1.325	0.056805
Zm00001d026678_P001	SKP1-interacting partner 15	43.747	1.06	1.112		1.008	0.992		1.019	1.074		0.921	0.082703	0.964	0.4062	1.046	0.24212
Zm00001d048777_P020	Splicing factor U2af large subunit A	30.394								0.925
Zm00001d020738_P001	Gibberellin receptor GID1L2	35.813			0.588			0.538			0.556	0.915		0.946		1.033
Zm00001d003007_P001	Pentatricopeptide repeat (PPR) superfamily protein	51.585			1.112			1.034			0.997	0.93		0.897		0.964
Zm00001d041511_P005	Heparanase-like protein 1	59.643			1.408			1.231			1.064	0.874		0.756		0.864
Zm00001d003220_P003	ATP/GTP binding protein	40.527	1.171	1.162	1.041	1.212	1.073	1.054	0.959	0.964	1.055	0.99	0.85954	0.883	0.064176	0.892	0.102278
Zm00001d018070_P001	S-adenosyl-L-methionine-dependent methyltransferases superfamily protein	42.626	0.951			1.085			1.035			1.141		1.088		0.954
Zm00001d032763_P007	Pre-mRNA-processing factor 19 homolog 2	55.377			0.964			1.036			1.004	1.075		1.041		0.969
Zm00001d027313_P001	Probable xyloglucan endotransglucosylase/hydrolase protein 32	33.642	1.696	1.635	1.721	1.452	1.263	1.363	1.033	1.183	0.967	0.807	0.0074813	0.63	0.00161656	0.781	0.025337
Zm00001d031418_P001	Frataxin mitochondrial	22.004	1.1	1.032	1.092	0.783	0.99	0.946	1.096	1.018	1.246	0.843	0.078875	1.042	0.57338	1.236	0.083562
Zm00001d029983_P001	Beta-amylase 3 chloroplastic	59.631	0.291	0.884		1.087	1.081		2.282	0.936		1.845	0.40206	2.739	0.2756	1.484	0.62396
Zm00001d048052_P001	uncharacterized protein	26.696	1.179			1.191			1.062			1.01		0.901		0.892
Zm00001d020359_P002	Enhanced ethylene response protein 5	46.435	0.774			1.282			1.068			1.656		1.38		0.833
Zm00001d034364_P005	Tetratricopeptide repeat (TPR)-like superfamily protein	141.47	0.92	1.058	0.711	1.045	0.947	1.132	1.004	0.995	1.095	1.162	0.2759	1.151	0.27356	0.99	0.90108
Zm00001d021582_P001	Probable protein phosphatase 2C 20	31.735	0.818	0.84	0.825	0.907	0.976	1.019	1.074	1.061	1.043	1.169	0.0113372	1.28	2.418e-05	1.095	0.058543
Zm00001d019312_P001	beta glucosidase aggregating factor1 GN= bgaf1	19.115	1.191		1.306	1.258		1.207	0.96		1.108	0.987	0.83368	0.828	0.155557	0.839	0.139841
Zm00001d036305_P016	AP-1 complex subunit gamma-1	64.095		1.002	0.925		0.956	1.033		0.937	0.931	1.032	0.6263	0.969	0.5288	0.939	0.2516
Zm00001d029903_P002	Expansin-B4	29.206	1.232	1.214	1.319	0.985	0.845	0.746	0.897	0.841	0.771	0.684	0.0102639	0.666	0.00131541	0.974	0.82358
Zm00001d032186_P001	Ribonuclease 1	25.032	0.883	1.144	0.945	1.003	1.08	1.128	1.305	1.086	1.127	1.08	0.38664	1.184	0.147418	1.096	0.24594
Zm00001d021136_P001	PTI1-like tyrosine-protein kinase 3	40.446	1.129	1.22	1.179	1.249	1.077	1.107	0.837	0.917	0.998	0.973	0.59948	0.78	0.0107373	0.802	0.031402
Zm00001d051980_P010	Clathrin interactor EPSIN 2	92.185	0.811	0.898	0.927	1.29	1.271	1.335	1.105	1.06	0.976	1.478	0.00079649	1.192	0.032017	0.806	0.0052815
Zm00001d037993_P002	Ran-binding protein 1 homolog a	23.958	0.411	0.802	0.74	1.447	1.029	1.238	1.137	1.223	1.014	1.902	0.044198	1.728	0.054825	0.908	0.47208
Zm00001d043382_P004	glutamate-oxaloacetate transaminase1 electrophoretic mobility GN= got1	41.571			1.12			0.949			1.061	0.847		0.947		1.118
Zm00001d036608_P012	Glycosyl hydrolases family 31 protein	74.357		0.988			0.964			1.088		0.976		1.101		1.129
Zm00001d035597_P001	RmlC-like cupins superfamily protein	38.078	1.05	1.085	1.022	1.025	0.942	0.991	0.953	0.951	1.028	0.937	0.09488	0.929	0.074003	0.991	0.81446
Zm00001d030308_P001	ARO1-like protein 4	69.605		0.871			1.187			0.935		1.363		1.073		0.788
Zm00001d018418_P001	oxidoreductase zinc-binding dehydrogenase family protein	34.488	0.901	0.869	0.911	0.927	0.874	0.741	0.764	0.95	0.787	0.948	0.449	0.933	0.34798	0.984	0.8707
Zm00001d054044_P001	Catalase isozyme 3	56.577	1.178	1.184	1.227	1.16	1.181	1.213	1.208	1.219	1.226	0.99	0.61954	1.018	0.25804	1.028	0.113496
Zm00001d048424_P017	evolutionarily conserved C-terminal region 2	75.208	0.362	0.525	0.579	2.677	1.125	1.25	1.81	1.147	1.132	3.446	0.0187849	2.789	0.0083402	0.809	0.6429
Zm00001d044060_P001	Plastidic ATP/ADP-transporter	70.395	0.875	0.925		0.728	0.748		0.737	0.821		0.82	0.023482	0.866	0.138798	1.056	0.44352
Zm00001d009877_P001	Protein plastid transcriptionally active 16 chloroplastic	51.851			1.041			0.916			0.933	0.88		0.896		1.019
Zm00001d021187_P001	Hydroxyacylglutathione hydrolase 2 mitochondrial	34.413	1.337	1.19	1.112	1.047	1.269	1.208	1.198	0.997	1.174	0.968	0.70166	0.926	0.38336	0.956	0.61174
Zm00001d019262_P002	Proteasome subunit beta type	29.305	0.557	0.448		1.072	1.09		1.012	0.958		2.151	0.019436	1.96	0.026302	0.911	0.082717
Zm00001d009779_P001	dihydrolipoyl dehydrogenases	59.353	0.419	0.84	0.659	1.073	1.037	1.046	1.139	1.147	1.042	1.645	0.118901	1.735	0.103502	1.054	0.183938
Zm00001d020401_P001	Probable cinnamyl alcohol dehydrogenase 6	24.307		0.637	0.674		0.675	0.754		1.273	1.273	1.09	0.30446	1.942	0.00180098	1.782	0.0090047
Zm00001d027703_P003	L-ornithine N5-acetyltransferase NATA1	24.626	1.107	0.854	1.135	0.97	0.942	1.081	1.12	1.303	1.018	0.967	0.79648	1.111	0.40238	1.15	0.17718
Zm00001d025939_P008	Vesicle-associated protein 1-1	24.38			1.206			0.995			0.84	0.825		0.697		0.844
Zm00001d015505_P001	Nucleoid-associated protein chloroplastic	32.269	1.105	1.334	1.224	0.866	1	1.004	0.836	1.036	0.841	0.784	0.029004	0.741	0.027436	0.945	0.52878
Zm00001d038865_P013	60S ribosomal protein L28-1	16.015	1.18	1.102	1.183	1.041	1.101	1.061	1.024	1.008	1.006	0.924	0.051224	0.877	0.0053959	0.948	0.03882
Zm00001d038136_P001	alpha/beta-Hydrolases superfamily protein	24.779	1.096		1.01	0.967		1.015	0.986		0.94	0.941	0.33296	0.915	0.20146	0.972	0.48832
Zm00001d043538_P001	BURP domain-containing protein-RD22-like2 Water deficit caused a 1.6-fold increase in the expression GN= burp2	45.761			1.113			1.111			1.164	0.998		1.046		1.048
Zm00001d049016_P001	F-box/kelch-repeat protein SKIP20	39.57
Zm00001d010026_P001	Lysophospholipid acyltransferase LPEAT1	42.88	0.77			1.037			0.965			1.347		1.253		0.931
Zm00001d028267_P008	trehalose-6-phosphate synthase2 GN= trps2	69.441	0.939			0.969			1.009			1.032		1.075		1.041
Zm00001d026649_P001	opaque endosperm7 like o1 GN= o7	55.132	0.595	0.562	0.614	0.817	0.672	0.768	1.165	1.085	1.1	1.274	0.0191806	1.892	4.338e-05	1.484	0.0029643
Zm00001d001849_P001	Probable acyl-activating enzyme 5 peroxisomal	60.128	1.02			1.099			1.385			1.077		1.358		1.26
Zm00001d025060_P005	tRNA-dihydrouridine(47) synthase [NAD(P)(+)]-like	73.418		0.666			1.077			1.075		1.617		1.614		0.998
Zm00001d035156_P008	Glyceraldehyde-3-phosphate dehydrogenase 2%2C cytosolic	31.982	0.968	1.261		0.947	0.999		1.091	1.083		0.873	0.44456	0.975	0.92206	1.117	0.054181
Zm00001d022449_P001	Potassium transporter 2	87.655			0.874			0.864			0.795	0.989		0.91		0.92
Zm00001d012844_P002	26S proteasome non-ATPase regulatory subunit 12 homolog B	50.543	1.114	1.047	1.077	1.008	1.09	1.09	0.983	0.863	1.03	0.985	0.64142	0.888	0.096323	0.902	0.149499
Zm00001d010135_P006	Cell division protein FtsZ homolog 2-2 chloroplastic	50.151	0.877	0.759	1.026	0.92	0.97	0.975	1.308	1.119	0.983	1.076	0.41566	1.281	0.107204	1.19	0.118695
Zm00001d047502_P001	DEAD-box ATP-dependent RNA helicase 35	68.525	0.755	0.915	0.376	1.229	1.168	1.34	0.95	1.013	0.963	1.826	0.134501	1.43	0.258	0.783	0.00548
Zm00001d043225_P001	Pentatricopeptide repeat-containing protein mitochondrial	43.187		0.85	0.757		1.414	1.031		0.881	0.979	1.521	0.135656	1.157	0.20242	0.761	0.25572
Zm00001d031429_P002	pfkB-like carbohydrate kinase family protein	33.977	0.698	0.908	0.659	0.811	1.044	0.927	0.899	0.966	0.915	1.228	0.161722	1.227	0.101044	0.999	0.9595
Zm00001d027706_P002	transducin family protein / WD-40 repeat family protein	104.17	0.631	0.671	0.626	1.18	1.366	1.191	1.278	1.177	1.19	1.938	0.00022228	1.891	4.3577e-05	0.975	0.6875
Zm00001d039865_P001	triose phosphate isomerase4 electrophoretic mobility GN= tpi4	27.025	1.117	1.046	1.051	0.922	0.943	0.873	0.923	0.935	0.969	0.852	0.006763	0.88	0.0075405	1.033	0.29964
Zm00001d002880_P001	isopropylmalate dehydrogenase2 GN= imd2	42.988	0.719	0.693	0.799	0.715	1.221	0.968	0.724	0.562	1.096	1.313	0.193477	1.077	0.85872	0.82	0.44006
Zm00001d023729_P002	Nitrilase-like protein 2	34.826	1.059	1.088	1.006	0.904	0.992	0.871	0.829	0.927	0.962	0.878	0.04306	0.862	0.040679	0.982	0.77198
Zm00001d033104_P007	protein GN=Expressed protein	142.46	0.948	0.785	0.847	0.952	1.027	0.934	0.915	0.985	1.03	1.129	0.117043	1.136	0.117125	1.006	0.9091
Zm00001d022125_P008	Exportin-T	107.96		0.998	1.101		0.953	0.976		0.985	1.041	0.919	0.24096	0.965	0.60204	1.05	0.24684
Zm00001d013390_P001	Glucan endo-1%2C3-beta-glucosidase 7	45.329
Zm00001d044907_P003	alpha/beta-Hydrolases superfamily protein	63.116	0.958	0.552	0.649	0.794	0.462	0.465	0.708	0.517	0.554	0.797	0.39154	0.824	0.4068	1.034	0.7907
Zm00001d001903_P006	Carboxylesterase SOBER1	24.033		1.096			0.9			1.207		0.821		1.101		1.341
Zm00001d011735_P001	serine acetyltransferase1 GN= sat1	32.446	0.535	0.635		0.832	1.13		1.062	1.074		1.677	0.101099	1.826	0.0195184	1.089	0.64172
Zm00001d032566_P002	uncharacterized protein	50.952		1.126			1.128			0.973		1.002		0.864		0.863
Zm00001d007610_P004	SEC12-like protein 2	29.027	0.515			0.919			1.183			1.784		2.297		1.287
Zm00001d050198_P002	alpha/beta-Hydrolases superfamily protein	28.656	1.1	1.04	0.997	0.977	0.949	0.971	0.869	0.916	0.971	0.923	0.057301	0.879	0.038961	0.951	0.20096
Zm00001d050375_P002	14-3-3-like protein	28.864	1.205	1.171	0.986	1.048	0.938	0.953	0.879	1.099	1.025	0.874	0.139263	0.893	0.28072	1.022	0.81652
Zm00001d030346_P001	Hsp20/alpha crystallin family protein	22.619	1.585	1.488	1.622	0.997	1.075	1.13	0.752	0.71	0.781	0.682	0.00100306	0.478	4.0292e-05	0.7	0.0014796
Zm00001d041214_P003	ATPase 4 plasma membrane-type	105.47	1.346	1.174	1.195	1.079	1.084	1.12	0.883	0.928	0.922	0.884	0.051956	0.736	0.0026012	0.832	0.00071727
Zm00001d032333_P003	Phosphoglucan phosphatase LSF1 chloroplastic	24.328	0.655			0.916			1.36			1.398		2.076		1.485
Zm00001d013398_P001	uncharacterized protein	63.736	0.825	0.703	1.255	1.058	1.157	1.217	0.906	0.943	0.916	1.233	0.24998	0.994	0.90184	0.806	0.0073204
Zm00001d007300_P005	Target of Myb protein 1	63.699	1.11	1.233	1.254	1.075	1.216	1.096	0.861	0.877	0.943	0.942	0.32772	0.745	0.0034167	0.792	0.007879
Zm00001d038163_P020	pyruvate, orthophosphate dikinase1 cDNA, genomic and peptide sequences GN= pdk1	62.952		0.764			0.715			1.202		0.936		1.573		1.681
Zm00001d025131_P004	protein disulfide isomerase11 GN= pdi11	46.676	1.115	1.234	1.086	1.204	1.086	1.086	1.218	0.929	1.17	0.983	0.76006	0.966	0.68658	0.983	0.8103
Zm00001d012920_P001	ST225	14.569			0.55			0.57			0.492	1.036		0.895		0.863
Zm00001d051951_P010	casein kinase I	39.728		0.321			1.492			0.988		4.648		3.078		0.662
Zm00001d000133_P012	Acetyl-coenzyme A synthetase chloroplastic/glyoxysomal	70.168	1.487	1.37	1.441	1.157	1.105	1.274	1.089	1.2	1.113	0.823	0.0152239	0.792	0.0034803	0.962	0.50214
Zm00001d003864_P003	SNF4	28.838	1.029	1.089	1.04	0.833	0.97	0.98	1.099	0.852	0.829	0.881	0.080485	0.88	0.2126	0.999	0.95216
Zm00001d038589_P003	Glyoxysomal processing protease glyoxysomal	76.308
Zm00001d020603_P001	Eukaryotic initiation factor 4F subunit p150 isoform 1	41.79	0.88	0.72	0.741	0.784	0.697	0.759	0.597	0.639	0.785	0.957	0.59574	0.863	0.22088	0.902	0.29168
Zm00001d049573_P001	cytochrome P450 family 87 subfamily A polypeptide 6	56.932			1.925			0.692			0.997	0.359		0.518		1.441
Zm00001d017501_P002	Peroxisome biogenesis protein 19-1	27.524	1.006	0.931	1.136	0.976	1.134	0.947	0.995	1.089	1.411	0.995	0.95338	1.137	0.36958	1.143	0.34844
Zm00001d049706_P034	KH domain-containing protein	72.245			0.748			1.096			1.114	1.465		1.489		1.016
Zm00001d033896_P001	lemon white1 white seedling, pale yellow endosperm GN= lw1	51.601	0.619	0.668	0.553	0.789	0.808	0.798	1.095	1.157	1.233	1.302	0.040458	1.894	0.0005824	1.455	0.00043677
Zm00001d036710_P002	Probable protein phosphatase 2C 21	40.076	0.781			0.929			1.362			1.19		1.744		1.466
Zm00001d033383_P002	hydroxymethylpyrimidine phosphate synthase1 GN= thic1	67.108	0.55	0.781	0.572	0.882	1.016	0.909	1.056	1.28	1.402	1.475	0.028359	1.964	0.0080213	1.332	0.040122
Zm00001d037234_P006	Sugary2	37.706	0.998			0.638			1.16			0.639		1.162		1.818
Zm00001d008727_P007	phospholipase D2 GN= pld2	84.859		1.094			0.928			0.966		0.848		0.883		1.041
Zm00001d029822_P001	Carotene epsilon-ring hydroxylase	32.871	1.128			0.89			1.092			0.789		0.968		1.227
Zm00001d010445_P002	Abscisic acid receptor PYL9	19.017
Zm00001d024425_P007	Regulator of Vps4 activity in the MVB pathway protein	51.815		1.297	1.207		1.164	1.383		1.008	1.115	1.017	0.89488	0.848	0.115976	0.834	0.21386
Zm00001d049082_P005	uncharacterized protein	17.604	0.915			0.915			0.951			1		1.039		1.039
Zm00001d011717_P001	Ras-related protein RABG3a	21.429	1.078	1.102	1.124	0.944	0.956	1.019	0.925	0.862	0.887	0.883	0.0094432	0.809	0.00087853	0.916	0.048981
Zm00001d035920_P001	Binding partner of ACD11 1	28.415		0.743	0.815		1.025	1.222		0.987	1.064	1.442	0.067255	1.316	0.043782	0.913	0.45392
Zm00001d052210_P001	UDP-glycosyltransferase 85A7	37.838		0.815	0.871		0.797	0.788		1.032	0.858	0.94	0.2109	1.121	0.37702	1.192	0.20446
Zm00001d012170_P001	Calreticulin-3	46.621	0.954		0.976	0.783		0.729	0.762		0.76	0.783	0.0227	0.789	0.0023238	1.007	0.87298
Zm00001d040798_P001	thiamin diphosphokinase1 GN= tdpk1	22.186	0.66	0.973	1.127	0.974	1.002	0.83	1.099	0.89	0.892	1.017	0.83604	1.044	0.73876	1.027	0.79964
Zm00001d006084_P007	Uridine kinase	54.416	0.962	1.033	0.952	0.939	0.985	0.937	1.014	1.032	1.005	0.971	0.3909	1.035	0.25852	1.066	0.023398
Zm00001d039709_P001	uncharacterized protein	42.011	1.009			0.871			0.85			0.863		0.842		0.976
Zm00001d025195_P002	Serine carboxypeptidase-like 20	58.23	1.126	1.001	1.1	1.199	1.105	1.169	0.964	1.013	1.002	1.076	0.161979	0.923	0.112978	0.858	0.0057563
Zm00001d010731_P002	Mitochondrial import inner membrane translocase subunit TIM50	42.504	0.83			1.157			1.148			1.394		1.383		0.992
Zm00001d005159_P003	Spermidine synthase 2	25.207	1.115	1.021	1.165	0.936	0.943	0.798	0.844	0.935	0.856	0.811	0.034343	0.798	0.0110786	0.984	0.83618
Zm00001d046460_P001	UDP-glycosyltransferase 75B1	51.291	0.896			0.817			1.311			0.912		1.463		1.605
Zm00001d014726_P009	Mitogen-activated protein kinase 17	54.44		0.967			1.001			1.072		1.035		1.109		1.071
Zm00001d018867_P004	Syntaxin 132	34.336		0.558	1.01		1.053	0.985		0.911	0.937	1.3	0.41444	1.179	0.55694	0.907	0.114936
Zm00001d043775_P009	BEST Arabidopsis thaliana protein match is HEAT repeat-containing protein (TAIRAT5G01400.1) GN=CONTAINS InterPro DOMAIN/s: Symplekin tight junction protein C-terminal (InterPro:IPR022075)	84.274	0.931		0.745	1.074		1.016	1.163		1.058	1.247	0.187256	1.325	0.1415	1.063	0.38782
Zm00001d009683_P014	Putative DUF1296 domain containing family protein	83.281			0.689			1.051			1.092	1.525		1.585		1.039
Zm00001d006717_P006	SUMO-activating enzyme subunit 2	41.854		1.05			0.928			1.102		0.884		1.05		1.188
Zm00001d042140_P001	Beta-1%2C3-glucanase	35.976	0.412	0.42	0.443	0.543	0.581	0.455	1.034	1.087	1.072	1.238	0.051377	2.504	2.0139e-06	2.022	0.00067792
Zm00001d002658_P006	Transducin/WD40 repeat-like superfamily protein	49.595	1.168	1.242		1.036	1.064		0.992	1.172		0.871	0.054641	0.898	0.33906	1.03	0.78226
Zm00001d004123_P002	Lactoylglutathione lyase	17.677	1.041	1.131	1.139	0.824	0.799	0.92	0.974	1.011	0.864	0.768	0.0068381	0.86	0.052304	1.12	0.15084
Zm00001d044465_P001	GDSL esterase/lipase	46.959	1.097	1.084		0.815	0.893		0.884	0.841		0.783	0.033482	0.791	0.0117031	1.01	0.857
Zm00001d032519_P002	protein GN=Expressed protein	59.965
Zm00001d048709_P002	benzoxazinless1 plastid localized, committed step in cyclic hydroxamates/DIMBOA synthesis GN= bx1	36.521		1.943			0.741			0.668		0.381		0.344		0.901
Zm00001d032464_P061	Kinesin-like protein KIN-7D mitochondrial	36.638	1.064			1.021			1.036			0.96		0.974		1.015
Zm00001d014178_P012	Acylamino-acid-releasing enzyme	84.233			0.915			0.959			0.992	1.048		1.084		1.034
Zm00001d033187_P002	Glycerophosphoryl diester phosphodiesterase	21.014			0.718			1.024			0.723	1.426		1.007		0.706
Zm00001d027371_P001	T-complex protein 1 subunit delta	57.732	0.977	1.225	0.903	0.998	0.889	0.919	1.126	1.22	1.003	0.904	0.39062	1.079	0.4938	1.194	0.058042
Zm00001d044514_P002	Ubiquitin carboxyl-terminal hydrolase	53.612	1.015	1.092	1.01	0.897	0.884	0.824	1.021	0.929	1.03	0.836	0.007857	0.956	0.33632	1.144	0.033536
Zm00001d013590_P001	ARF guanine-nucleotide exchange factor GNOM	156.67	0.714	0.913	0.801	0.973	0.942	1.007	1.198	1.185	0.999	1.203	0.061303	1.393	0.02252	1.157	0.081723
Zm00001d007912_P010	Calcium-dependent protein kinase 20	30.435		0.994			1.526			0.799		1.535		0.804		0.524
Zm00001d030040_P001	nonsense-mediated mRNA decay NMD3 family protein	58.742			1.091			0.969			0.987	0.888		0.905		1.019
Zm00001d043815_P006	Methionyl-tRNA formyltransferase	9.5661			0.898			1.067			1.049	1.188		1.168		0.983
Zm00001d037026_P001	uncharacterized protein	30.471	0.282	0.324		1.082	1.07		1.271	1.136		3.551	0.0029975	3.972	0.0041595	1.118	0.189463
Zm00001d050139_P006	Histone deacetylase	49.991			0.97			1.047			0.982	1.079		1.012		0.938
Zm00001d021120_P001	ARM repeat superfamily protein	46.409	0.909	0.931	1.028	1.012	0.955	0.87	1.149	1.272	0.951	0.989	0.8541	1.176	0.168964	1.189	0.155618
Zm00001d035562_P007	Mannose-specific jacalin-related lectin GN=Expressed protein	33.409	1.268	1.529	1.39	1.195	1.202	1.211	1.332	1.298	1.269	0.862	0.114601	0.931	0.2868	1.081	0.0059614
Zm00001d046949_P001	Haloacid dehalogenase-like hydrolase (HAD) superfamily protein	30.524	1.237	1.177	1.131	1.004	1.059	1.123	1.049	1.013	1.066	0.899	0.060998	0.882	0.014137	0.982	0.64854
Zm00001d009594_P010	Aspartic proteinase A1	46.105	0.969	1.217	1.312	1.372	1.411	1.035	1.537	1.364	1.177	1.091	0.55662	1.166	0.2625	1.068	0.60962
Zm00001d005756_P008	ATP-dependent 6-phosphofructokinase 5 chloroplastic	57.689		1.078	1.137		0.923	0.97		0.833	0.877	0.855	0.049802	0.772	0.0198843	0.903	0.104635
Zm00001d035094_P001	40S ribosomal protein S13-1	17.213	1.117	1.107	1.131	0.95	0.926	0.905	0.907	0.876	0.932	0.829	0.00025759	0.809	0.00036307	0.976	0.3486
Zm00001d037544_P001	Putative receptor-like protein kinase family protein	92
Zm00001d011891_P001	S-formylglutathione hydrolase	31.886	1.226	1.208	1.158	0.917	0.951	0.949	0.905	0.894	0.925	0.784	0.00030302	0.758	0.000156233	0.967	0.095745
Zm00001d028205_P004	Mitochondrial substrate carrier family protein	39.723		0.53	0.609		0.897	0.901		1.038	1.039	1.579	0.095695	1.824	0.073001	1.155	0.00024445
Zm00001d051629_P002	Pyrophosphate--fructose 6-phosphate 1-phosphotransferase subunit alpha 2	63.1	1.2	1.267		0.758	0.871		1.166	1.068		0.66	0.030538	0.906	0.19288	1.371	0.06102
Zm00001d044606_P001	Bifunctional monothiol glutaredoxin-S16 chloroplastic	31.341	1.042	1.052	1.185	0.974	1.167	1.049	0.963	0.846	1.055	0.973	0.69116	0.873	0.145322	0.898	0.25798
Zm00001d028759_P001	Pyruvate decarboxylase isozyme 3	65.061	0.686	0.718	0.745	0.737	0.659	0.722	0.991	0.947	0.968	0.986	0.73594	1.352	0.00037749	1.372	0.00099698
Zm00001d040348_P001	uncharacterized protein	26.345	0.598		0.644	1.053		0.811	1.159		0.982	1.501	0.099196	1.724	0.026939	1.149	0.45108
Zm00001d038091_P005	Carbon catabolite repressor protein 4 homolog 4	28.948	0.65	0.704		0.712	0.681		1.164	0.915		1.029	0.5912	1.535	0.079502	1.492	0.084657
Zm00001d024857_P012	Discordia 1%3B Discordia1	20.338			1.001			1.152			1.024	1.151		1.023		0.889
Zm00001d022510_P021	4-alpha-glucanotransferase DPE2	85.87		0.981			0.927			0.957		0.945		0.976		1.032
Zm00001d021021_P002	Peptidyl-prolyl cis-trans isomerase	15.787		1.056	0.99		0.804	0.736		1.06	0.897	0.753	0.035039	0.957	0.64908	1.271	0.128737
Zm00001d002942_P003	Tubulin-folding cofactor B	21.158	0.821			0.705			0.835			0.859		1.017		1.184
Zm00001d011121_P002	Ribosomal RNA processing Brix domain protein	29.829	0.373	0.331	0.341	1.509	1.202	1.384	1.162	1.144	1.15	3.919	5.7535e-05	3.307	0.00091625	0.844	0.130621
Zm00001d002919_P001	Tetratricopeptide repeat (TPR)-like superfamily protein	51.426	0.927	1.011	1.07	0.862	1.138	0.832	0.965	0.967	1.087	0.941	0.55764	1.004	0.95016	1.066	0.53378
Zm00001d048985_P001	protein GN=Expressed protein	18.326			0.966			1.267			1.219	1.312		1.262		0.962
Zm00001d013076_P001	60S ribosomal protein L4-1	44.339	0.766	0.667	0.482	0.852	0.878	0.829	0.816	0.647	0.55	1.336	0.155921	1.051	0.77398	0.787	0.160304
Zm00001d033218_P007	DNA-directed RNA polymerase II subunit 2	96.59		0.686			1.466			1.161		2.137		1.692		0.792
Zm00001d010519_P001	Tetratricopeptide repeat (TPR)-like superfamily protein	45.759	0.76	0.583	0.62	1.006	1.052	1.003	1.003	1.041	1.029	1.559	0.005245	1.565	0.030218	1.004	0.84184
Zm00001d008907_P002	Polyadenylate-binding protein-interacting protein 9	32.804			0.674			0.959			1.134	1.423		1.682		1.182
Zm00001d006904_P001	Multifunctional methyltransferase subunit TRM112-like protein	14.51	0.888	0.956	0.842	0.911	0.967	1.033	0.927	0.79	0.884	1.084	0.194505	0.968	0.61154	0.894	0.130116
Zm00001d019108_P073	Ribosomal protein S1-like1 cDNA GN= rps1	103.87
Zm00001d021245_P001	Rhodanese-like domain containing protein	25.522	1.027	1.026	1.101	1.044	0.975	1.148	1.1	1.015	1.088	1.004	0.96576	1.016	0.6783	1.011	0.82142
Zm00001d016902_P003	Bifunctional riboflavin biosynthesis protein RIBA 1 chloroplastic	60.092	0.675	0.395	0.705	1.144	1.221	1.248	1.119	1.232	1.121	2.035	0.058605	1.956	0.020541	0.961	0.38436
Zm00001d023243_P004	2-isopropylmalate synthase 1 chloroplastic	67.335	0.735	0.666	0.637	0.952	0.9	0.983	1.025	1.037	1.039	1.391	0.0025994	1.522	0.0100045	1.094	0.025881
Zm00001d009247_P001	Rapid alkalinization factor 1	11.303		0.77	0.769		1.137	1.151		0.972	0.887	1.487	0.00024036	1.208	0.152105	0.812	0.045619
Zm00001d028550_P003	LIM domain-containing protein WLIM2b	15.777	0.964	1.043		1.101	1.015		1.026	1.073		1.054	0.44918	1.046	0.42232	0.992	0.88664
Zm00001d043524_P003	Glucan endo-13-beta-glucosidase 13	43.007			1.182			0.949			1.031	0.803		0.872		1.086
Zm00001d037593_P001	Gamma-tubulin complex component 4	53.983	0.109		0.152	0.176		0.223	0.196		0.201	1.529	0.168963	1.521	0.121742	0.995	0.98882
Zm00001d013609_P005	uncharacterized protein	17.821	0.907	1.2	1.024	1.031	1.082	0.979	1.086	1.006	0.975	0.988	0.94106	0.98	0.87096	0.992	0.85646
Zm00001d033535_P011	Cox19-like CHCH family protein	14.326	0.87	1.064		1.206	1.174		0.986	0.942		1.231	0.17148	0.997	0.98842	0.81	0.0154353
Zm00001d001978_P115	MAP3K epsilon protein kinase 1	142.73	0.818			1.168			0.764			1.428		0.934		0.654
Zm00001d029467_P001	uncharacterized protein	64.783	0.924		1.018	1.058		0.958	1.105		1.112	1.038	0.64426	1.142	0.110557	1.1	0.192615
Zm00001d031013_P003	Methylcrotonoyl-CoA carboxylase subunit alpha	80.446	0.925	0.927	0.915	0.879	0.953	0.935	1	1.006	1.061	1	0.98256	1.108	0.0059614	1.108	0.028603
Zm00001d027854_P006	sucrose transporter1 mutant plants are deficient in leaf sucrose unloading to pholem GN= sut1	55.149	0.873			0.956			0.866			1.095		0.992		0.906
Zm00001d038079_P001	Inositol polyphosphate multikinase beta	24.451	0.799	0.937	0.594	0.958	0.895	1.12	0.906	0.959	1.053	1.276	0.160439	1.252	0.162285	0.982	0.8491
Zm00001d048514_P005	brown midrib4 mutant looks like bm1 GN= bm4	63.599			1.062			0.913			0.927	0.86		0.873		1.015
Zm00001d009163_P001	Dihydrolipoyl dehydrogenase	52.653	1.082	0.913	1.004	0.929	0.759	0.84	0.869	0.858	0.917	0.843	0.087377	0.882	0.08018	1.046	0.48202
Zm00001d023756_P003	uncharacterized protein	38.362	1.048		0.949	1.01		1.069	0.854		0.827	1.041	0.54706	0.842	0.081636	0.809	0.022817
Zm00001d017985_P003	Pyruvate dehydrogenase E1 component alpha subunit	42.7	1.029	1.004	1.095	0.969	0.974	0.888	0.932	0.802	0.891	0.905	0.064901	0.839	0.026484	0.927	0.22662
Zm00001d051112_P001	RAN GTPase-activating protein 2	56.214
Zm00001d026489_P001	protein GN=OSJNBb0022F16.11 protein	43.38	0.454		0.752	1.031		1.299	1.094		1.138	1.932	0.132822	1.851	0.125001	0.958	0.78492
Zm00001d003917_P009	RNA polymerase III RPC4	22.541		0.889			1.131			1.037		1.272		1.166		0.917
Zm00001d003060_P001	uncharacterized protein	56.613	1.736			1.925			1.583			1.109		0.912		0.822
Zm00001d041734_P001	uncharacterized protein	10.032	0.857	1.094	0.917	1.066	0.972	1.096	0.951	0.964	0.859	1.093	0.31766	0.967	0.73736	0.885	0.076461
Zm00001d047087_P001	beta expansin8 Expb2 specifically expressed in the elongationg region of maize primary roots GN= expb8	31.626			1.243			0.751			0.858	0.604		0.69		1.142
Zm00001d052792_P001	Putative O-Glycosyl hydrolase superfamily protein	82.871			0.924			0.879			0.859	0.951		0.93		0.977
Zm00001d028396_P003	26S proteasome non-ATPase regulatory subunit 4 homolog	42.101	1.147	1.188	1.087	1.014	1.012	0.961	0.943	0.967	1.009	0.873	0.0122584	0.853	0.008157	0.977	0.43126
Zm00001d035616_P003	Soluble inorganic pyrophosphatase 4	24.19	0.929		0.744	0.824		0.973	0.878		0.91	1.074	0.64616	1.069	0.58538	0.995	0.9856
Zm00001d045199_P005	Pre-mRNA-processing-splicing factor 8A	274.49			0.9			1.137			1.1	1.263		1.222		0.967
Zm00001d002244_P002	Polyadenylate-binding protein RBP45C	30.134	0.643			0.911			1.082			1.417		1.683		1.188
Zm00001d040291_P001	Dynein light chain type 1 family protein	14.295		0.891	0.909		0.958	0.984		1.133	1.04	1.079	0.045222	1.207	0.050876	1.119	0.130761
Zm00001d039910_P001	Protein ASPARTIC PROTEASE IN GUARD CELL 1	51.822	1.11	1.297	1.075	0.946	0.921	0.849	0.928	0.908	0.929	0.78	0.020805	0.794	0.060277	1.018	0.6019
Zm00001d026521_P008	Inner membrane protease subunit 1	10.256	1.007	0.852	1.059	0.893	1.061	1.038	1.461	0.911	1.227	1.025	0.77208	1.233	0.2699	1.203	0.31752
Zm00001d038378_P001	Coatomer subunit zeta-1	19.458			1.028			1.034			0.831	1.006		0.808		0.804
Zm00001d002063_P001	UDP-glycosyltransferase 89B1	50.56	1.163	1.065	0.899	1.025	0.93	0.949	0.721	1.011	1.274	0.929	0.44164	0.961	0.75592	1.035	0.961
Zm00001d018112_P011	Polyadenylate-binding protein 3	13.331			0.459			1.05			1.107	2.288		2.412		1.054
Zm00001d016733_P001	NDR1/HIN1-like 1	20.336		1.056	0.989		0.978	1.21		1.215	1.011	1.07	0.63128	1.089	0.49316	1.017	0.9066
Zm00001d023792_P016	Phosphoglucan water dikinase chloroplastic	35.884		1.025			1.02			0.91		0.995		0.888		0.892
Zm00001d047893_P003	phosphoenolpyruvate carboxykinase homolog2 syntenic with pck1 GN= pck2	72.569	0.71	0.831	0.865	1.208	1.13	1.111	1.134	1.052	1.053	1.433	0.0051644	1.346	0.0099836	0.939	0.153003
Zm00001d012831_P001	Cleavage and polyadenylation specificity factor subunit 3-I	76.999		1.058			0.862			0.906		0.815		0.856		1.051
Zm00001d021553_P010	Regulator of nonsense transcripts 1 homolog	105.29	1.001		0.712	1.046		1.062	0.985		0.949	1.231	0.32284	1.129	0.51166	0.917	0.050222
Zm00001d024839_P001	glutathione S-transferase2 safener-induced GN= gst2	24.57	0.633	0.816	0.698	0.44	0.474	0.46	1.32	1.253	1.271	0.64	0.0046001	1.79	0.00147685	2.798	1.3392e-06
Zm00001d000128_P001	uncharacterized protein	13.067	1.104			0.829			0.773			0.751		0.7		0.932
Zm00001d034876_P001	Â GN= AY109916	77.411	0.883			0.963			0.948			1.091		1.074		0.984
Zm00001d021051_P002	Proteasome subunit beta type	24.326	1.246	1.161	1.014	0.825	0.939	0.942	0.758	0.914	0.996	0.791	0.035515	0.78	0.067138	0.986	0.84876
Zm00001d037288_P001	Probable carboxylesterase 2	33.306	1.006	1.051	1.141	1.085	1.02	0.975	1.556	1.643	1.609	0.963	0.48336	1.503	0.00052231	1.561	0.00021676
Zm00001d037497_P003	Villin-1	63.074			1.094			0.947			0.831	0.866		0.76		0.878
Zm00001d024998_P020	acetyl-coenzyme A carboxylase1 tissue-culture selected resistance to cyclohexanedione (e.g., sethoxydim) and aryloxy phenoxypropionate (e.g., haloxyfop) herbicides GN= acc1	244.83	1.069			0.882			0.978			0.825		0.915		1.109
Zm00001d038804_P007	Dolichyl-diphosphooligosaccharide--protein glycosyltransferase subunit STT3A	86.733	0.92	1.125	1.131	1.096	0.966	1	1.008	1.089	1.316	0.964	0.68878	1.075	0.53854	1.115	0.303
Zm00001d045607_P001	Nucleic acid-binding OB-fold-like protein	18.26	0.93	1.195	0.72	1.08	1	1.063	0.927	0.913	0.953	1.105	0.46218	0.982	0.9872	0.889	0.0114837
Zm00001d030770_P001	Diacylglycerol kinase 1	74.025		1.264	1.273		1.06	0.945		0.873	0.979	0.79	0.054183	0.73	0.031384	0.924	0.43102
Zm00001d047765_P001	Glutathione S-transferase L2 chloroplastic	31.697	1.129	0.993	1.056	0.517	0.608	0.525	1.357	1.489	1.274	0.519	0.00049793	1.296	0.0114765	2.497	0.000181635
Zm00001d020175_P005	Proton pump-interactor 1	67.027	0.749	0.877		1.065	1.127		1.176	0.917		1.348	0.069362	1.287	0.23442	0.955	0.71552
Zm00001d024715_P001	EYES ABSENT homolog	34.154	1.113	0.967	1.159	0.936	1.015	0.97	0.966	0.964	0.922	0.902	0.166081	0.881	0.094079	0.976	0.4462
Zm00001d048282_P002	tubulin-tyrosine ligases GN=tubulin-tyrosine ligases	99.232	0.94	0.949	0.938	1.036	0.948	1.054	1.078	1.101	1.014	1.075	0.164876	1.129	0.039865	1.051	0.28862
Zm00001d050574_P001	C2H2 and C2HC zinc fingers superfamily protein	7.4835		0.735			1.158			1.094		1.576		1.488		0.945
Zm00001d032331_P001	Peptidyl-prolyl cis-trans isomerase	46.639	0.971	0.978	0.925	0.865	0.881	0.852	0.675	0.758	0.774	0.904	0.0072843	0.768	0.0044793	0.849	0.0195181
Zm00001d027851_P001	uncharacterized protein	11.753			0.414			1.058			0.984	2.556		2.377		0.93
Zm00001d040281_P001	uncharacterized protein	8.8105	0.979	0.973	1.141	0.789	0.925	1.197	1.104	1.286	1.228	0.941	0.61096	1.17	0.0844	1.243	0.150102
Zm00001d022433_P001	Eukaryotic translation initiation factor 2 subunit beta	30.372		1.044			1.016			1.001		0.973		0.959		0.985
Zm00001d047124_P001	Proline oxidase	50.645	0.845			0.978			1.115			1.157		1.32		1.14
Zm00001d014436_P008	26S proteasome non-ATPase regulatory subunit 13 homolog A	38.572	1.197	1.311	1.277	0.97	0.936	1.001	0.881	0.978	0.954	0.768	0.00137686	0.743	0.002019	0.968	0.41666
Zm00001d050741_P006	SPla/RYanodine receptor (SPRY) domain-containing protein	18.873	0.525		0.758	1.039		0.896	1.268		1.088	1.508	0.164998	1.836	0.088982	1.218	0.20606
Zm00001d003288_P001	Eukaryotic translation initiation factor 4B2	60.791	0.723		0.684	1.06		1.08	1.115		1.046	1.521	0.0048225	1.536	0.0095807	1.01	0.80618
Zm00001d043986_P004	Pyruvate kinase	62.638			1.114			0.929			0.951	0.834		0.854		1.024
Zm00001d031712_P008	uncharacterized protein	79.99	1.189			0.982			0.81			0.826		0.681		0.825
Zm00001d019449_P009	DEAD-box ATP-dependent RNA helicase 5	55.301	0.693			1.336			1.019			1.928		1.47		0.763
Zm00001d040357_P003	Pre-mRNA-splicing factor SPF27 homolog	29.013		1.122	0.649		0.964	1.056		0.971	0.939	1.141	0.6074	1.078	0.72158	0.946	0.3742
Zm00001d021846_P004	Insulin-degrading enzyme-like 1 peroxisomal	103.5	1.016	0.993	0.997	0.923	0.976	0.942	1.067	1.108	1.067	0.945	0.033264	1.079	0.0063597	1.141	0.0030356
Zm00001d020283_P001	CD2-binding protein-related	46.763		1.117	0.952		0.926	0.851		0.873	1.186	0.859	0.23924	0.995	0.94548	1.159	0.4809
Zm00001d026619_P004	Pyruvate kinase	65.783		1.067	0.948		0.849	1.049		0.912	1.03	0.942	0.65178	0.964	0.70528	1.023	0.84736
Zm00001d022209_P001	Developmentally-regulated GTP-binding protein 1	41.112	0.971	0.966	0.949	1.053	1.046	1.048	0.992	1.056	1.029	1.09	0.00027821	1.066	0.03034	0.978	0.33752
Zm00001d045798_P002	uncharacterized protein	68.038	1.143	1.128	1.21	1.091	1.145	1.168	1.248	1.006	1.151	0.978	0.49236	0.978	0.72046	1	0.96354
Zm00001d048174_P004	Serine--tRNA ligase cytoplasmic	51.663		0.367	0.645		1.239	1.064		1.337	1.378	2.276	0.098838	2.683	0.068095	1.179	0.163815
Zm00001d028907_P042	FAD/NAD(P)-binding oxidoreductase family protein	64.153			0.817			0.635			0.591	0.777		0.723		0.931
Zm00001d049709_P001	Polyneuridine-aldehyde esterase	42.189	1.142		0.848	1.067		1.211	1.034		1.102	1.145	0.4667	1.073	0.64654	0.938	0.46856
Zm00001d033421_P001	Deoxyuridine 5'-triphosphate nucleotidohydrolase	22.934	0.947	0.889	1.205	0.698	0.961	0.974	0.823	1.144	0.845	0.866	0.36296	0.925	0.59516	1.068	0.68752
Zm00001d003836_P009	aspartate/glutamate/uridylate kinase family protein	13.987
Zm00001d034937_P001	Glutathione S-transferase T1	28.135	0.721	0.751	0.82	0.792	0.828	0.787	1.001	0.906	0.852	1.05	0.2903	1.204	0.037721	1.146	0.053423
Zm00001d049958_P005	Putative peptidyl-prolyl cis-trans isomerase and WD40 repeat domain family protein	55.074	1.12	1.071	0.37	0.906	1.272	1.179	1.05	0.807	0.942	1.311	0.37772	1.093	0.62488	0.834	0.23844
Zm00001d026014_P002	Expansin-A13	24.025			1.017			0.878			0.984	0.863		0.968		1.121
Zm00001d013497_P001	Zinc finger CCCH domain-containing protein 30	79.793	0.987		1.008	1.1		1.04	0.9		1.018	1.073	0.145045	0.961	0.57746	0.896	0.24262
Zm00001d049764_P001	myosin heavy chain-related	50.896	1.117	0.747	1.15	1.022	1.034	0.905	1.242	1.355	1.396	0.982	0.99426	1.325	0.106143	1.349	0.0055815
Zm00001d053001_P001	Eukaryotic aspartyl protease family protein	44.137	0.57		0.627	1.16		1.195	1.771		1.754	1.967	0.0053806	2.945	0.00195845	1.497	0.0014984
Zm00001d037215_P011	protein disulfide oxidoreductases GN=electron carriers	80.848		0.903			0.824			1.032		0.913		1.143		1.252
Zm00001d015138_P002	uncharacterized protein	335.33			1.102			1.012			1.176	0.918		1.067		1.162
Zm00001d028923_P003	Probable pre-mRNA-splicing factor ATP-dependent RNA helicase DEAH3	81.735	0.928	1.007	0.926	1.032	1.242	1.003	1.016	0.582	1.034	1.145	0.142719	0.92	0.60554	0.803	0.28372
Zm00001d033214_P001	CSL zinc finger domain-containing protein	26.169	0.921			1.112			0.992			1.207		1.077		0.892
Zm00001d050565_P001	DNAJ heat shock N-terminal domain-containing protein	73.102		1.032			1.103			1.185		1.069		1.148		1.074
Zm00001d003214_P001	protoporphyrinogen IX oxidase2 GN= prpo2	59.046	0.907		1.075	1.091		0.941	0.978		0.903	1.025	0.8402	0.949	0.65066	0.926	0.46484
Zm00001d017874_P001	LORELEI-LIKE-GPI ANCHORED PROTEIN 3	18.461	0.914			0.978			0.858			1.07		0.939		0.877
Zm00001d028695_P005	Protein MODIFIER OF SNC1 11	12.6	0.582	0.502	0.669	1.156	1.035	1.03	0.919	0.882	0.854	1.837	0.0025234	1.515	0.0079008	0.824	0.0112957
Zm00001d007279_P001	La-related protein 6B	51.271	0.662			1.01			1.172			1.526		1.77		1.16
Zm00001d018694_P006	T-complex protein 1 subunit epsilon	50.779	0.93	0.867	0.886	1.049	0.988	0.799	0.947	0.984	1.014	1.057	0.59414	1.098	0.031299	1.038	0.63186
Zm00001d021310_P001	Triosephosphate isomerase	32.421	1.331	1.27	1.227	1.04	1.067	1.136	1.016	0.94	0.949	0.847	0.0092616	0.759	0.00125587	0.896	0.03746
Zm00001d002064_P001	Glycosyltransferase	48.406	0.94	1.109		0.999	1.032		0.759	0.803		0.991	0.95354	0.762	0.091596	0.769	0.0149762
Zm00001d039299_P001	40S ribosomal protein S15a-1	14.79			0.653			1.116			1.052	1.709		1.611		0.943
Zm00001d033368_P045	Transducin/WD40 repeat-like superfamily protein	170.64	1.03	1.077		1.016	1.034		1.009	1.007		0.973	0.37406	0.957	0.188237	0.983	0.199583
Zm00001d018798_P006	IAP-like protein 1	86.445	0.472	0.528	0.508	1.454	1.478	1.44	1.321	1.33	1.314	2.899	3.0007e-06	2.629	0.00116279	0.907	0.00030414
Zm00001d041456_P001	26S proteasome non-ATPase regulatory subunit 11 homolog	47.704	1.429	1.378	1.262	1.185	1.306	1.169	1.27	1.099	1.254	0.899	0.105577	0.89	0.119422	0.99	0.8582
Zm00001d005470_P001	uncharacterized protein	23.384	1.04			0.915			0.741			0.88		0.713		0.81
Zm00001d051607_P002	Heat shock 70 kDa protein 17	96.927
Zm00001d009074_P001	pseudouridine synthase and archaeosine transglycosylase (PUA) domain-containing protein	19.671	0.956	1.075	0.95	0.914	0.954	0.985	1.024	0.95	1.054	0.957	0.4025	1.016	0.7637	1.061	0.1932
Zm00001d002791_P012	Dolichyl-P-Man Man	16.393	0.943	0.844	0.886	0.9	0.848	0.881	0.908	0.999	0.93	0.984	0.68632	1.061	0.2375	1.079	0.087337
Zm00001d037540_P001	Fasciclin-like arabinogalactan protein 2	44.726	1.313	1.209	1.184	0.983	1.032	1.085	0.828	0.902	0.94	0.836	0.0137642	0.72	0.0025633	0.861	0.03322
Zm00001d030011_P001	Eukaryotic translation initiation factor 3 subunit B	82.999	0.81	0.75	0.779	1.586	1.542	1.48	1.027	1.062	1.113	1.97	2.1265e-05	1.369	0.00062011	0.695	0.00029604
Zm00001d017000_P002	MLP3.9 protein	7.9771			1.492			1.33			1.462	0.891		0.98		1.099
Zm00001d036897_P001	DEAD-box ATP-dependent RNA helicase 52	64.613	0.954	1.039	0.991	0.848	0.884	0.901	0.99	1.09	0.964	0.882	0.0149206	1.02	0.69122	1.156	0.025379
Zm00001d022541_P002	SNARE-like superfamily protein	12.898	1.118		0.857	0.96		0.881	0.91		1.033	0.932	0.69892	0.984	0.95428	1.055	0.56144
Zm00001d021802_P004	ARF GAP-like zinc finger-containing protein ZIGA3	40.259		0.968	0.937		0.947	1.086		0.912	0.879	1.067	0.4663	0.94	0.128644	0.881	0.22108
Zm00001d048410_P003	Ras-related protein RABF1	20.797		0.965			1.219			1.418		1.263		1.469		1.163
Zm00001d009004_P006	tRNAse Z4	44.309		1.07	1.093		0.923	1.074		1.114	1.103	0.923	0.39288	1.025	0.169916	1.11	0.2929
Zm00001d017989_P001	GDSL esterase/lipase	39.214	1.304	1.247	1.282	1.212	1.561	1.227	0.794	0.796	0.889	1.044	0.70914	0.647	0.00037919	0.62	0.0063811
Zm00001d031257_P001	Cupredoxin superfamily protein	17.447	0.984	0.654	0.492	0.667	0.783	0.693	1.63	1.398	1.502	1.006	0.83994	2.127	0.0182648	2.114	0.00033806
Zm00001d028966_P002	ELMO/CED-12 family protein	36.726	0.68	0.625	0.496	1.198	1.143	1.061	1.29	1.364	1.349	1.889	0.0030807	2.223	0.00108435	1.177	0.014042
Zm00001d027321_P005	uncharacterized protein	32.404		0.714			0.936			1.038		1.311		1.454		1.109
Zm00001d006251_P001	Thioredoxin superfamily protein	26.019	1.419	1.325	1.514	1.124	1.137	1.145	1.275	1.278	1.258	0.8	0.029365	0.895	0.106098	1.119	0.000101912
Zm00001d036371_P001	ATP-dependent zinc metalloprotease FTSH 5 chloroplastic	72.762	0.975	0.929	1.022	0.907	0.953	0.911	0.907	0.938	0.824	0.947	0.164758	0.912	0.12342	0.963	0.40764
Zm00001d027421_P001	50S ribosomal protein L11 chloroplastic	22.692	0.934	0.748	0.943	0.953	1.02	0.968	0.805	0.96	0.937	1.12	0.20428	1.029	0.75338	0.919	0.21178
Zm00001d030282_P014	Probable alpha-mannosidase	112.98	1.074		0.878	1.053		1.256	0.964		1.101	1.183	0.33372	1.058	0.6726	0.894	0.42394
Zm00001d049641_P005	Glyceraldehyde-3-phosphate dehydrogenase 1%2C cytosolic	36.494			0.832			0.831			0.786	0.999		0.945		0.946
Zm00001d016072_P002	50S ribosomal protein L21 chloroplastic	23.723			0.893			0.813			0.693	0.91		0.776		0.852
Zm00001d032440_P020	Protein kinase superfamily protein	76.451	0.692		0.774	1.145		1.149	1.223		1.063	1.565	0.078962	1.559	0.038597	0.997	0.94614
Zm00001d043445_P003	Dihydroorotase	44.516	1.013	1.15	1.027	1.024	1.033	1.01	0.992	1.091	1.1	0.961	0.40662	0.998	0.97626	1.038	0.34596
Zm00001d050921_P002	60S ribosomal protein L6	24.288	1.264			1.018			0.987			0.805		0.781		0.97
Zm00001d052978_P001	ADP-ribosylation factor C1	20.317	0.868		0.863	1.03		1.303	1.08		1.031	1.348	0.24406	1.22	0.0136443	0.905	0.51742
Zm00001d051543_P001	60S ribosomal protein L12-3	17.768	0.918	1.166	1.156	1.03	0.919	1.345	1.1	1.026	0.874	1.017	0.94818	0.926	0.50688	0.911	0.55386
Zm00001d036161_P010	Coatomer subunit beta'-3	90.791	0.856	0.647	0.731	0.97	0.873	1.14	1.024	0.962	1.111	1.335	0.061204	1.386	0.022004	1.038	0.65966
Zm00001d053863_P003	60S ribosomal protein L37a-2	10.243	0.932	1.028	1.025	1.003	1.052	1.05	1.011	0.941	0.987	1.04	0.3241	0.985	0.71756	0.947	0.103323
Zm00001d001814_P001	Clathrin light chain 2	32.386	0.591		0.585	1.254		1.078	1.1		1.142	1.983	0.0121365	1.906	0.00090242	0.961	0.68412
Zm00001d041192_P003	sucrose transporter2 mutants grow slower and have increased sugar content in leaves GN= sut2	53.371	0.959	0.99	0.786	1.085	1.124	1.155	0.963	1.058	0.979	1.23	0.046636	1.097	0.28172	0.892	0.028181
Zm00001d010718_P001	Calreticulin-3	7.5912		1.091	1.183		0.953	0.877		0.922	0.938	0.805	0.064476	0.818	0.040179	1.016	0.72616
Zm00001d005023_P001	40S ribosomal protein S16	16.75	0.84	1.094	0.918	0.764	0.833	0.783	1.183	0.989	1.135	0.835	0.098418	1.16	0.185277	1.389	0.0055017
Zm00001d026415_P005	Beta-D-xylosidase 4	68.798	1.333	1.293	1.25	1.19	1.116	1.091	1.017	0.958	1.021	0.876	0.0143998	0.773	0.0007439	0.882	0.0194798
Zm00001d033890_P002	Core-2/I-branching beta-16-N-acetylglucosaminyltransferase family protein	44.663		0.815	1.051		1.282	1.153		1.256	1.195	1.305	0.186224	1.314	0.162843	1.007	0.90812
Zm00001d011080_P001	Protease inhibitor%3B Proteinase inhibitor	7.6046	0.182	0.309	0.388	0.547	0.545	0.603	1.778	1.859	1.625	1.928	0.090141	5.986	0.00128332	3.104	2.2755e-05
Zm00001d051951_P006	casein kinase I	17.337	0.417	0.491	0.767	1.055	1.125	0.973	1.142	1.078	1.11	1.882	0.023619	1.988	0.058701	1.056	0.28214
Zm00001d016477_P002	Eukaryotic aspartyl protease family protein	36.184		1.027			1.005			0.987		0.979		0.961		0.982
Zm00001d044274_P001	DENN domain and WD repeat-containing protein SCD1	76.109	1.092	1.021	0.953	0.91	0.879	1.017	1.001	1.001	0.88	0.915	0.20574	0.94	0.34578	1.027	0.68468
Zm00001d029976_P001	calcineurin B-like1 GN= cbl1	22.242	1.212	1.073	1.105	0.987	1.011	1.045	1.002	1.247	1.13	0.898	0.056676	0.997	0.93984	1.11	0.197176
Zm00001d030223_P001	ATP binding protein	29.891	0.719	0.912	0.689	0.645	0.882	0.879	0.653	1.095	0.827	1.037	0.81522	1.11	0.63144	1.07	0.77398
Zm00001d016452_P019	uncharacterized protein	62.733	0.864		0.826	0.786		0.879	0.872		0.913	0.985	0.81312	1.056	0.23108	1.072	0.36168
Zm00001d042843_P001	nana plant1 short, erect dwarf GN= na1	29.014		1.252			1.112			0.925		0.888		0.739		0.832
Zm00001d023536_P003	Magnesium-chelatase subunit ChlI-1 chloroplastic	45.874	0.846	0.915	0.922	0.836	0.979	0.834	0.98	0.857	0.83	0.987	0.81574	0.994	0.8985	1.007	0.92864
Zm00001d044164_P003	Beta-adaptin-like protein A	92.438			1.012			0.898			0.737	0.887		0.728		0.821
Zm00001d034015_P004	exoglucanase1 genomic and cDNA clones GN= exg1	66.912			0.888			1.167			1.554	1.314		1.75		1.332
Zm00001d029377_P001	uncharacterized protein	28.541	1.346	1.283	1.384	1.622	1.709	1.518	0.549	0.584	0.669	1.208	0.009881	0.449	0.00021509	0.372	0.000123115
Zm00001d030256_P007	alpha/beta-Hydrolases superfamily protein	29.946
Zm00001d031554_P002	Type II inositol polyphosphate 5-phosphatase 15	114.58			0.732			1.139			0.987	1.556		1.348		0.867
Zm00001d044573_P071	Pre-mRNA-processing protein 40A	14.513	0.59			1.948			0.807			3.302		1.368		0.414
Zm00001d008997_P005	Putative VHS/GAT domain containing family protein	46.384	0.743		1.297	1.025		0.958	0.908		1.076	0.972	0.97634	0.973	0.98332	1.001	0.98048
Zm00001d004022_P004	RPM1-interacting protein 4	25.975	0.255	0.3	0.39	1.339	1.378	1.217	1.063	1.081	1.052	4.163	0.00037506	3.382	0.0099566	0.812	0.005778
Zm00001d007234_P002	ascorbate peroxidase2 leaf cDNA, similar to plant cytosolic ascorbate peroxidase GN= apx2	25.782	1.011			0.914			0.818			0.904		0.809		0.895
Zm00001d037429_P001	Thioredoxin reductase	38.522	1.139	1.371	0.802	1.009	1.426	1.391	0.828	1.45	0.912	1.155	0.46284	0.963	0.85738	0.834	0.38372
Zm00001d036749_P001	Putative sucrose-phosphate synthase family protein	109.21		0.851	0.906		1.023	1.127		1.055	0.958	1.224	0.073222	1.146	0.142804	0.936	0.43698
Zm00001d041173_P001	Beta-glucosidase 17	63.3	0.405	0.784	0.152	0.575	0.626	0.473	0.556	0.544	0.154	1.248	0.43404	0.935	0.9861	0.749	0.37424
Zm00001d048954_P001	GDP-mannose 3%2C5-epimerase 2 isoform 1%3B GDP-mannose 3%2C5-epimerase 2 isoform 2	42.043	0.855	0.871	0.843	0.924	0.905	0.887	1.196	1.087	1.072	1.057	0.021278	1.306	0.00173704	1.235	0.0044447
Zm00001d049579_P002	Tyrosine--tRNA ligase 1 cytoplasmic	41.448	0.306	0.936	0.317	0.514	1.225	0.707	0.594	1.101	0.652	1.569	0.30054	1.505	0.28112	0.96	0.96618
Zm00001d002034_P004	6%2C7-dimethyl-8-ribityllumazine synthase	20.165			1.443			0.873			0.823	0.605		0.57		0.943
Zm00001d031688_P002	Putative 14-3-3 protein	29.007	1.045	0.936	0.791	1.337	1.263	1.32	1.16	1.179	1.061	1.414	0.0130445	1.227	0.07438	0.867	0.0181019
Zm00001d009669_P009	Sugar transporter ERD6-like 6	33.673	0.762	0.818		1.012	1.041		1.043	0.961		1.299	0.020504	1.268	0.048263	0.976	0.62346
Zm00001d029583_P001	Polygalacturonase inhibitor 1	30.03	0.323	0.377	0.235	0.976	0.865	1.021	1.139	1.256	1.166	3.061	0.00154059	3.809	0.00067873	1.244	0.0187794
Zm00001d026144_P001	Acyl-CoA thioesterase family protein	19.694	0.839	0.929	0.907	1.033	0.905	1.022	1.197	0.988	1.064	1.107	0.127857	1.215	0.039417	1.098	0.26084
Zm00001d017945_P001	ADP-ribosylation factor-like A1A	20.64	1.385	1.613	1.434	1.084	0.964	1.029	0.955	0.87	0.938	0.694	0.0031402	0.623	0.00096309	0.898	0.072824
Zm00001d012173_P001	Fructokinase-1	34.603	0.869	0.907	0.738	0.92	0.895	0.966	0.984	1.079	1.062	1.106	0.192744	1.243	0.032924	1.124	0.032376
Zm00001d007583_P001	40S ribosomal protein S19 mitochondrial	15.612	1.135			0.871			0.892			0.767		0.786		1.024
Zm00001d042362_P006	Leucine-rich repeat receptor protein kinase EMS1	98.827
Zm00001d028712_P011	Arogenate dehydratase/prephenate dehydratase 2 chloroplastic	25.615	0.337			0.954			1.074			2.831		3.187		1.126
Zm00001d032160_P001	Dephospho-CoA kinase	25.688	0.839	1.105	1.078	0.988	0.886	0.917	0.935	0.787	0.993	0.924	0.47896	0.898	0.40488	0.973	0.70394
Zm00001d027503_P020	Calcium-binding EF hand family protein	109.31		0.829	0.928		1.05	0.949		0.874	0.93	1.138	0.22986	1.027	0.71084	0.902	0.22826
Zm00001d026501_P001	Glutamine synthetase leaf isozyme chloroplastic	46.03	0.678	0.699	0.718	0.718	0.741	0.67	0.616	0.659	0.633	1.016	0.67264	0.911	0.021802	0.896	0.037559
Zm00001d053564_P004	KH domain-containing protein	70.037	1.077	1.111	1.144	1.071	1.106	0.981	0.982	1.019	0.961	0.948	0.2425	0.889	0.0085227	0.938	0.187339
Zm00001d005358_P001	Nuclear pore complex protein GP210	60.267	1.118	1.085	1.149	1.001	1.049	0.987	0.856	0.886	0.89	0.906	0.0162819	0.785	0.00030156	0.867	0.0029633
Zm00001d020531_P003	cellulose synthase 12 coordinately expressed with cesa10 and cesa11 GN= cesa12	87.652			0.887			1.537			0.994	1.733		1.121		0.647
Zm00001d022602_P001	universal stress family protein	21.162	0.962	0.852	1.019	1.012	1.029	0.976	0.991	0.985	1.059	1.065	0.30006	1.071	0.28492	1.006	0.84976
Zm00001d009182_P009	enoyl-CoA hydratase1 leaf cDNA 6C06C04 (uaz348) similar to animal fatty acid beta-oxidation enzyme GN= ech1	79.03	0.962	0.916	0.98	0.901	0.855	0.933	1.02	1.101	1.058	0.941	0.131937	1.112	0.023596	1.182	0.0075804
Zm00001d047727_P004	Ran-binding protein 1	23.17
Zm00001d017097_P001	Rhodanese-like domain-containing protein 11 chloroplastic	26.744	0.657	0.612	0.867	0.667	0.665	0.895	0.587	0.665	0.909	1.043	0.7799	1.012	0.97366	0.97	0.82988
Zm00001d025273_P019	Double Clp-N motif-containing P-loop nucleoside triphosphate hydrolases superfamily protein	102.07	0.872	0.479	0.896	1.012	1.157	1.011	0.808	1.099	0.925	1.415	0.140477	1.26	0.305	0.891	0.28864
Zm00001d025170_P002	stearoyl-acyl-carrier-protein desaturase11 GN= sacd11	43.781	0.743			0.976			1.119			1.314		1.506		1.147
Zm00001d002936_P005	Transportin-1	91.861		1.046			1.105			1.121		1.056		1.072		1.014
Zm00001d022032_P001	ribosome-inactivating protein2 genomic sequence produces RIP protein in E. coli GN= rip2	33.346	0.64	0.638	0.63	0.868	0.892	0.889	1.025	1.11	0.967	1.388	2.4157e-06	1.626	0.0068386	1.171	0.0187183
Zm00001d040603_P005	ATP-citrate synthase beta chain protein 2	55.563			0.951			0.977			1.053	1.027		1.107		1.078
Zm00001d029049_P001	Photosystem II repair protein PSB27-H1 chloroplastic	17.757		1.104	1.169		1.168	1.127		0.947	0.997	1.01	0.79712	0.855	0.055599	0.847	0.033743
Zm00001d047039_P001	nonsense-mediated mRNA decay NMD3 family protein	58.964	0.968	0.988	0.903	1.113	1.102	1.258	1.055	1.099	1.046	1.215	0.0186551	1.119	0.02222	0.921	0.150579
Zm00001d040235_P004	Cysteine synthase mitochondrial	33.528	0.696	1.043	0.991	0.765	0.88	0.875	0.707	0.781	0.693	0.923	0.64784	0.799	0.187281	0.865	0.07088
Zm00001d013318_P017	E3 ubiquitin-protein ligase HOS1	51.527			0.955			1.031			1.136	1.08		1.19		1.102
Zm00001d047534_P002	ABC transporter E family member 2	68.205	0.934		0.989	0.978		1.085	1.093		1.118	1.073	0.36264	1.15	0.045101	1.072	0.31542
Zm00001d017181_P001	Polyadenylate-binding protein RBP45C	29.412	0.708			1.11			0.727			1.568		1.027		0.655
Zm00001d045603_P064	polymerase II transcription-mediator3 encodes part of the "CDK8" module that mediates transcription initiation with RNA Polymerase II GN= polm3	83.912
Zm00001d026139_P001	Putative calcium-dependent protein kinase family protein	67.241	1.199	1.271	1.278	1.057	0.964	1.096	0.852	0.815	1.072	0.832	0.0128427	0.731	0.021395	0.879	0.22018
Zm00001d019130_P001	Metallopeptidase M24 family protein	61.048	0.961		1.123	0.946		0.99	1.055		0.921	0.929	0.47442	0.948	0.662	1.021	0.82122
Zm00001d019040_P007	D-2-hydroxyglutarate dehydrogenase mitochondrial	60.987			1.355			1.042			0.942	0.769		0.695		0.904
Zm00001d012211_P007	Probable methyltransferase PMT25	56.431			0.568			1.038			1.011	1.827		1.78		0.974
Zm00001d035559_P001	Mannose-specific jacalin-related lectin GN=Expressed protein	32.88	1.646	1.775	1.757	1.254	1.331	1.232	1.233	1.309	1.242	0.737	0.00078217	0.731	0.00048415	0.991	0.7914
Zm00001d010858_P014	Cullin-1	77.416		0.981			1.002			0.935		1.021		0.953		0.933
Zm00001d053572_P001	RNA-binding (RRM/RBD/RNP motifs) family protein	53.364			1.748			1.587			1.551	0.908		0.887		0.977
Zm00001d016708_P001	Beta-fructofuranosidase%2C cell wall isozyme	39.863	1.204	0.94		0.61		0.525				0.529	0.04876
Zm00001d019754_P002	Short-chain dehydrogenase TIC 32 chloroplastic	34.155			0.752			0.99			1.173	1.316		1.56		1.185
Zm00001d037553_P003	LisH/CRA/RING-U-box domains-containing protein	45.426	0.938	0.927	1.017	0.848	0.944	0.973	0.993	1.025	0.833	0.959	0.45238	0.989	0.85248	1.031	0.73148
Zm00001d051535_P003	P-loop containing nucleoside triphosphate hydrolases superfamily protein	60.211	0.624			1.065			1.106			1.707		1.772		1.038
Zm00001d028436_P002	V-type proton ATPase subunit a3	88.765	1.11	1.031	1.098	0.984	0.978	0.933	0.983	0.91	0.926	0.894	0.0170953	0.87	0.0133155	0.974	0.40342
Zm00001d044642_P001	CBL-interacting kinase	26.788	1.289			1.003			0.755			0.778		0.586		0.753
Zm00001d050155_P001	P-loop containing nucleoside triphosphate hydrolases superfamily protein	20.927	1.133	0.939	1.075	1.022	0.722	0.837	1.124	0.822	0.981	0.82	0.14914	0.93	0.50688	1.134	0.39858
Zm00001d024059_P002	Actin-related protein 6	48.248		0.923			1.02			1.125		1.105		1.219		1.103
Zm00001d033328_P001	N-acetyl-gamma-glutamyl-phosphate reductase	45.292	1.234	1.188	1.125	0.989	1.013	1.018	0.983	0.883	0.954	0.851	0.0047847	0.795	0.005319	0.934	0.104481
Zm00001d012027_P014	Dynamin-related protein 3A	76.371		1.001			1			0.776		0.999		0.775		0.776
Zm00001d026359_P002	uncharacterized protein	132.73	0.847	0.799	0.839	1.053	1.08	1.1	1.054	1.122	1.167	1.301	0.0002813	1.345	0.00103943	1.034	0.36728
Zm00001d020224_P002	Has 214 Blast hits to 214 proteins in 102 species Archae - 0 GN=CONTAINS InterPro DOMAIN/s: Mitochondrial distribution/morphology family 35/apoptosis (InterPro:IPR007918)	11.454	0.618	0.561	0.521	1.326	1.369	1.323	1.189	1.148	1.125	2.364	6.4877e-05	2.036	0.000161821	0.862	0.0015972
Zm00001d021372_P001	Regulator of chromosome condensation (RCC1) family protein	45.433			0.362			0.945			0.956	2.61		2.641		1.012
Zm00001d045836_P001	Aspartyl protease AED1	48.781	1.139	0.913	1.142	1.7	1.561	1.529	0.985	1.129	1.009	1.5	0.0071821	0.978	0.83532	0.652	0.00128106
Zm00001d015037_P002	Glutamate--tRNA ligase chloroplastic/mitochondrial	62.468	0.982	1.04	0.796	1	0.817	0.915	1.114	0.969	1.177	0.969	0.79398	1.157	0.21	1.193	0.098124
Zm00001d041138_P004	Exocyst complex component SEC10	39.888	1.145			1.16			1.103			1.013		0.963		0.951
Zm00001d053930_P001	uncharacterized protein	33.739	0.9			0.969			1.058			1.077		1.176		1.092
Zm00001d011177_P001	Vacuolar protein-sorting protein 33	62.86		1.048			0.903			1.023		0.862		0.976		1.133
Zm00001d015676_P003	Clathrin heavy chain 2	31.458
Zm00001d030659_P030	modifier of snc1	83.51	1.129		0.56	0.972		1.147	0.694		1.08	1.255	0.51356	1.05	0.85636	0.837	0.48892
Zm00001d050178_P001	Eukaryotic aspartyl protease family protein	61.138
Zm00001d053782_P002	cytochrome P450 15 encodes CYP97B GN= cyp15	26.473		0.887			1.358			0.881		1.531		0.993		0.649
Zm00001d017613_P001	Protein LYK2	69.583	1.066	0.212	1.033	0.963	1.113	1.093	1.129	1.342	1.25	1.371	0.42082	1.61	0.3224	1.174	0.077355
Zm00001d014030_P001	Malate dehydrogenase cytoplasmic 1	33.257	0.324	0.419	0.337	0.497	0.57	0.482	0.522	0.514	0.518	1.434	0.0186008	1.439	0.043715	1.003	0.91966
Zm00001d013314_P009	vesicular transport protein1 NCBI similar to Aabidopsis Vps51/Vps67 family (components of vesicular transport) protein GN= vps1	26.053		1.21	1.097		0.967	0.943		0.936	1.014	0.828	0.065601	0.845	0.117744	1.021	0.68046
Zm00001d004617_P001	uncharacterized protein	14.405	0.249	0.234	0.292	0.414	0.358	0.335	0.42	0.29	0.44	1.428	0.0171209	1.484	0.060456	1.039	0.87
Zm00001d006438_P010	Regulator of nonsense transcripts 1 homolog	105.42		0.856			0.947			1.102		1.106		1.287		1.164
Zm00001d002386_P004	uncharacterized protein	21.829	0.537	0.489	0.675	1.195	1.152	1.141	1.143	1.211	1.184	2.051	0.0172446	2.08	0.00158335	1.014	0.55406
Zm00001d006133_P001	Thioesterase/thiol ester dehydrase-isomerase superfamily protein	56.536		1.001			0.988			1.03		0.987		1.029		1.043
Zm00001d049095_P004	EMB2756 (EMBRYO DEFECTIVE 2756)	75.021	0.575	0.428		1.213	1.247		1.181	1.362		2.453	0.025644	2.535	0.029177	1.034	0.71328
Zm00001d014134_P001	Ent-cassadiene C2-hydroxylase	56.02	0.306	0.336	0.39	0.84	0.814	0.781	1.645	1.467	1.633	2.359	0.00030217	4.598	4.1781e-05	1.949	9.8808e-05
Zm00001d047504_P001	UDP-glycosyltransferase 88A1	52.965	0.775	0.943	0.831	0.936	0.951	0.891	0.96	0.923	1.004	1.09	0.21646	1.133	0.110838	1.039	0.28756
Zm00001d045563_P001	dwarf plant3 like d1, plant short and compact GN= d3	53.584	0.761	0.739	0.747	0.732	0.669	0.946	0.686	0.498	0.842	1.045	0.78386	0.902	0.4962	0.863	0.43834
Zm00001d011136_P003	NADH dehydrogenase [ubiquinone] 1 beta subcomplex subunit 2	8.2201	0.728			1.223			1.289			1.68		1.771		1.054
Zm00001d014302_P001	Vacuolar-sorting receptor 4	60.757	0.891			0.987			1.024			1.108		1.149		1.037
Zm00001d051900_P001	Protein kinase superfamily protein	48.245	1.032	1.051	1.097	1.357	1.219	1.218	1.432	1.216	1.166	1.193	0.0119833	1.199	0.052435	1.005	0.97336
Zm00001d049790_P008	60S ribosomal protein L32	15.716		1.218	1.027		0.943	1.153		1.091	0.958	0.934	0.64812	0.913	0.49034	0.978	0.88416
Zm00001d049059_P001	alcohol dehydrogenase2 electrophoretic mobility, null alleles are known GN= adh2	41.066	1.381	1.251	1.329	1.09	1.119	1.057	1.136	1.122	1.1	0.825	0.0043846	0.848	0.0055757	1.028	0.21416
Zm00001d041511_P002	Heparanase-like protein 1	44.134	0.787			1.309			1.34			1.663		1.703		1.024
Zm00001d024640_P004	Oxidoreductase family protein	38.47		0.747	0.672		0.836	0.653		0.662	0.772	1.049	0.78448	1.011	0.93222	0.963	0.84174
Zm00001d025696_P001	Cellulase (glycosyl hydrolase family 5) protein	61.16		0.925			0.869			0.857		0.939		0.926		0.986
Zm00001d033931_P002	Alcohol dehydrogenase 1	40.931	0.844	0.877	0.852	0.814	0.815	0.826	0.851	0.926	0.903	0.954	0.0197627	1.042	0.21804	1.092	0.026804
Zm00001d024973_P006	uncharacterized protein	120.38
Zm00001d039051_P003	Sugar transporter ERD6-like 6	54.163	0.799			1.007			1.3			1.26		1.627		1.291
Zm00001d046472_P002	Hemoglobin-like protein HbO	12.353	0.892	0.809		0.789	0.664		0.898	1.057		0.854	0.24758	1.149	0.28598	1.345	0.129261
Zm00001d009474_P001	uncharacterized protein	99.55		1.132	1.001		0.948	0.831		1.111	1.3	0.834	0.181197	1.13	0.34798	1.355	0.097895
Zm00001d016697_P001	Germin-like protein subfamily 3 member 2	24.578	1.13	1.132	1.128	1.078	1.142	1.078	1.012	0.968	1.036	0.973	0.2845	0.89	0.027696	0.914	0.031959
Zm00001d019304_P001	uncharacterized protein	24.277	1.562	1.795	1.744	1.269	1.208	1.219	1.264	1.344	1.323	0.725	0.0020446	0.771	0.0049609	1.064	0.061165
Zm00001d027554_P001	LYR family of Fe/S cluster biogenesis protein	17.322		0.18	0.608		1.275	1.177		1.233	1.094	3.112	0.164959	2.953	0.176403	0.949	0.53586
Zm00001d005306_P003	Dynamin-related protein 1E	59.544	0.442	0.388		0.94	0.986		1.48	1.435		2.32	0.0066992	3.512	0.00282	1.513	0.0046768
Zm00001d051881_P009	Protein BTR1	37.03	0.814	0.83	0.863	1.145	1.145	1.065	1.128	1.147	1.146	1.338	0.00060119	1.365	6.3039e-05	1.02	0.46368
Zm00001d047420_P001	DUF679 domain membrane protein 2	19.921	1.312	1.316	1.192	1.126	1.062	1.182	0.897	0.876	0.792	0.882	0.049256	0.671	0.00135667	0.761	0.0051039
Zm00001d017783_P005	AAA-type ATPase family protein	58.565	1.193	0.545		0.938	0.864		1.035	0.794		1.037	0.806	1.052	0.80364	1.015	0.96456
Zm00001d034826_P012	Elongation factor G-1 mitochondrial	64.02	0.707			0.997			1.049			1.41		1.484		1.052
Zm00001d018613_P017	La-related protein 6C	22.441	0.914	0.949		1.085	0.967		0.913	0.968		1.101	0.25674	1.01	0.81288	0.917	0.31534
Zm00001d002325_P001	uncharacterized protein	31.608	0.377	0.595	0.569	1.084	0.958	1.066	1.616	1.356	1.435	2.017	0.0087028	2.86	0.002279	1.418	0.0057361
Zm00001d026064_P003	Polyprenol reductase 2	31.454			0.672			0.866			1.631	1.289		2.427		1.883
Zm00001d025715_P004	Plant UBX domain-containing protein 1	26.764		0.814			1.088			0.964		1.337		1.184		0.886
Zm00001d022629_P001	Proteasome subunit alpha type	27.257	1.134	1.137	1.249	0.967	0.891	0.888	1.023	1.056	0.84	0.78	0.0042019	0.829	0.071082	1.063	0.50012
Zm00001d049553_P001	Vesicle-associated protein 1-1	26.761	0.798	0.619	0.567	0.982	1.187	1.518	1.117	0.774	0.82	1.858	0.0194026	1.366	0.113402	0.735	0.147181
Zm00001d015227_P005	ATPase activators GN=chaperone binding	12.587			0.747			1.074			1.168	1.438		1.564		1.088
Zm00001d040279_P010	topless-related1 GN= tpl1	120.93	0.746			0.957			1.105			1.283		1.481		1.155
Zm00001d028686_P001	Receptor-like protein kinase HERK 1	91.129			1.067			0.987			1.134	0.925		1.063		1.149
Zm00001d030157_P001	ADP-ribosylation factor B1B	21.793	1.094	1.243	1.181	1.142	1.178	0.874	1.068	0.828	0.958	0.908	0.3648	0.811	0.061143	0.894	0.41428
Zm00001d024421_P001	Phosphopantothenate--cysteine ligase 1	31.331	1.1	1.075		0.906	0.964		0.984	1.023		0.86	0.044536	0.923	0.070442	1.073	0.192037
Zm00001d012667_P029	Putative serine peptidase S28 family protein	57.361	1.299	1.413	1.378	0.938	1.09	1.181	0.981	0.925	0.884	0.785	0.026676	0.682	0.00061552	0.869	0.138984
Zm00001d028511_P032	ARM repeat superfamily protein	76.773	0.745			1.212			1.123			1.627		1.507		0.927
Zm00001d012228_P003	4%2C5-DOPA dioxygenase extradiol	39.45	1.002	0.95	0.857	0.747	1.002	0.824	0.908	0.766	1.209	0.916	0.39428	1.026	0.94624	1.12	0.55048
Zm00001d052021_P003	DNA replication licensing factor MCM5	79.755	0.702	0.604	0.653	1.24	1.183	1.272	1.385	1.286	1.394	1.886	0.000196351	2.075	0.000136333	1.1	0.046657
Zm00001d006780_P016	histone deacetylase GN= hda109	42.609	1.16	1.237	1.023	1.147	1.373	1.494	1.451	1.777	1.258	1.174	0.176198	1.312	0.08254	1.118	0.44662
Zm00001d011103_P001	copper ion binding	20.31	0.239	0.417	0.529	1.327	1.313	1.181	0.738	0.744	0.829	3.224	0.036037	1.95	0.094698	0.605	0.00067967
Zm00001d052848_P001	COP9 signalosome complex subunit 6a	36.365		0.864	0.989		0.971	0.742		0.957	1.001	0.924	0.62802	1.057	0.50642	1.143	0.40584
Zm00001d005004_P001	Protein kinase superfamily protein	78.766		1.562	0.868		0.801	1.143		1.183	1.107	0.8	0.62518	0.942	0.95854	1.178	0.42666
Zm00001d009579_P001	60S ribosomal protein L18a	21.473
Zm00001d012772_P007	Profilin-1	13.151			1.413			1.189			1.463	0.841		1.035		1.23
Zm00001d022469_P001	Probable histone-arginine methyltransferase 1.4	117.06	1.112	1.065	0.819	0.957	0.881	0.884	0.936	0.921	0.931	0.909	0.42658	0.931	0.5772	1.024	0.41954
Zm00001d026290_P001	NAD(P)-binding Rossmann-fold superfamily protein	31.734	0.029						0.024					0.828
Zm00001d034914_P009	Protein EXPORTIN 1A	116.89	1.199	0.993	1.002	0.869	0.977	0.963	0.882	0.943	0.887	0.879	0.153455	0.849	0.069381	0.965	0.46676
Zm00001d019789_P004	homolog of histone chaperone HIRA	100.37	1.018	0.863	0.949	0.939	0.931	0.813	1.127	1.006	0.946	0.948	0.47066	1.088	0.29742	1.148	0.11904
Zm00001d018358_P001	Protein TIC 55 chloroplastic	59.406	0.728	0.702	0.874	0.748	0.615	0.917	0.679	0.767	0.8	0.99	0.8936	0.975	0.79552	0.985	0.97526
Zm00001d014862_P001	Calcium-binding EF hand family protein	130.82	1.042	1.145	1.105	1.025	0.994	1.003	0.784	0.766	0.833	0.918	0.042716	0.724	0.00096164	0.789	0.00086113
Zm00001d031434_P001	DNA-damage-repair/toleration protein DRT100	38.826	0.743	0.804		1.193	1.124		1.199	1.096		1.498	0.0146221	1.484	0.022237	0.991	0.86856
Zm00001d031804_P001	Probable carboxylesterase 2	34.763	0.489	0.637	0.782	0.518	0.187	0.869	0.972	0.47	0.621	0.825	0.49414	1.081	0.84976	1.311	0.46208
Zm00001d015427_P001	V-type proton ATPase catalytic subunit A	13.591	1.307	1.297	1.301	1.147	1.06	1.229	0.714	0.7	0.657	0.88	0.093717	0.53	0.00157544	0.603	0.00052107
Zm00001d024210_P001	terpene synthase6 GN= tps6	60.521		0.229			0.49			1.418		2.14		6.192		2.894
Zm00001d031481_P001	AT-hook motif nuclear-localized protein 10	41.776		0.916	0.907		1.348	1.185		0.714	0.783	1.389	0.036941	0.821	0.050717	0.591	0.02204
Zm00001d031554_P004	Type II inositol polyphosphate 5-phosphatase 15	121.6	0.683	0.999		1.156	1.115		0.966	0.905		1.35	0.23778	1.112	0.58642	0.824	0.034959
Zm00001d047186_P001	40S ribosomal protein S9	22.547	1.125	0.979	1.092	1.048	1.248	1.055	0.993	0.903	0.884	1.048	0.5544	0.87	0.065985	0.83	0.051835
Zm00001d014758_P001	phospholipid transfer protein homolog6 GN= plt6	17.009	1.228	1.556	1.101	0.954	1.241	1.468	1.09	0.558	1.106	0.943	0.7139	0.709	0.199697	0.752	0.2876
Zm00001d033149_P001	Acyl carrier protein	14.595
Zm00001d007490_P001	Probable prefoldin subunit 2	38.4	0.872	0.964	0.81	1.234	0.998	1.155	0.999	1.134	1.118	1.28	0.037977	1.229	0.032562	0.96	0.63064
Zm00001d047843_P003	Enolase	44.945	1.03			0.928			0.985			0.901		0.956		1.061
Zm00001d008984_P004	Cytochrome P450 71A26	23.14	0.922		1.135	1.065		1.112	1.017		0.995	1.058	0.619	0.978	0.88712	0.924	0.083081
Zm00001d021571_P001	UDP-glycosyltransferase 71B1	51.867	0.748	0.959	0.89	0.839	0.851	0.91	0.873	0.86	0.928	1.001	0.94364	1.025	0.72512	1.023	0.53336
Zm00001d034790_P001	40S ribosomal protein S4-3	28.004	1.025	0.647	0.825	1.062	1.089	1.074	1.117	0.99	1.043	1.292	0.176417	1.262	0.144684	0.977	0.527
Zm00001d047906_P011	Phosphomevalonate kinase	22.448	1.233	1.18	0.908	0.79	1.04	0.946	0.975	0.971	1.2	0.836	0.2301	0.947	0.69276	1.133	0.3014
Zm00001d035032_P004	GroES-like zinc-binding alcohol dehydrogenase family protein	42.482	1.086	1.039	1.058	0.966	0.898	0.993	0.883	0.816	0.924	0.898	0.029016	0.824	0.0072165	0.918	0.142378
Zm00001d053232_P007	26S proteasome non-ATPase regulatory subunit 3 homolog A	53.597	1.043	1.124	1.055	1.072	1.07	0.802	0.867	0.929	0.99	0.914	0.37614	0.865	0.030941	0.946	0.66988
Zm00001d028207_P012	ATP synthase subunit gamma mitochondrial	31.444		1.036	1.018		0.844	0.97		0.824	0.861	0.883	0.21268	0.82	0.0139364	0.929	0.42992
Zm00001d016311_P002	Metallopeptidase M24 family protein	56.717	1.061	1.132	1.05	0.928	0.878	0.932	0.929	0.885	0.932	0.844	0.0051008	0.847	0.0045237	1.003	0.9118
Zm00001d045893_P001	Retrovirus-related Pol polyprotein LINE-1	103.9	0.928	1.234	1.001	1.339	1.4	1.183	1.347	1.31	1.355	1.24	0.090424	1.268	0.103961	1.023	0.65134
Zm00001d039363_P001	Protein DJ-1 homolog B	45.142	0.964	0.975	1.087	1.03	0.925	0.942	0.996	0.988	0.953	0.957	0.44208	0.971	0.52076	1.014	0.70414
Zm00001d020134_P011	ABC transporter G family member 40	122.4			0.626			1.248			1.113	1.994		1.778		0.892
Zm00001d002377_P002	Galactokinase	47.698	0.945	0.789	1.062	1.073	1.376	1.083	1.194	1.18	1.072	1.263	0.119758	1.232	0.081462	0.976	0.84004
Zm00001d027524_P001	Basic endochitinase B	28.241	2.149	1.916	1.724	0.897	0.944	0.951	1.699	1.741	1.401	0.482	0.00039728	0.836	0.127918	1.734	0.00154402
Zm00001d005806_P001	protein kinase-related	12.219		1.076			0.844			1.016		0.784		0.944		1.204
Zm00001d028918_P001	NADH ubiquinone oxidoreductase1 endosperm cDNA 5C05D10 (uaz266), similar to a NADH-ubiquinone oxidoreductase subunit GN= nad1	19.383	1.348	1.331	1.286	1.177	1.153	1.045	1.021	1.063	0.888	0.851	0.0145196	0.75	0.0066555	0.881	0.121616
Zm00001d051856_P005	O-fucosyltransferase family protein	20.406	0.935	0.777	0.468	0.958	0.965	1.148	1.175	1.235	1.411	1.409	0.152579	1.753	0.048945	1.244	0.052942
Zm00001d033995_P003	uncharacterized protein	26.971
Zm00001d002261_P001	Peroxisomal (S)-2-hydroxy-acid oxidase GLO1	31.277		0.713			0.879			1.341		1.233		1.881		1.526
Zm00001d011526_P001	pfkB-like carbohydrate kinase family protein	37.51	0.801	1.012	0.999	0.887	0.977	0.908	0.849	0.864	0.921	0.986	0.9119	0.937	0.49128	0.95	0.25412
Zm00001d042767_P001	Glucan endo-13-beta-glucosidase 14	44.056	0.507	0.476	0.471	1.023	0.993	1.08	1.081	0.956	1.077	2.129	2.1655e-05	2.142	8.0724e-05	1.006	0.92402
Zm00001d050716_P003	Alkaline/neutral invertase CINV2	47.555		1.013			1.064			0.996		1.05		0.983		0.936
Zm00001d037115_P016	Choline/ethanolaminephosphotransferase 1	12.839	1.272	1.427		1.146	1.109		1.233	1.215		0.835	0.096524	0.907	0.23956	1.086	0.044641
Zm00001d049346_P001	Cell wall integrity protein scw1	34.752	0.865	1.036	0.836	1.068	1.164	1.123	0.917	0.944	0.838	1.226	0.043279	0.986	0.89386	0.804	0.0075195
Zm00001d024393_P004	Indole-3-glycerol phosphate synthase chloroplastic	37.247	0.867	0.888	0.849	0.82	0.831	0.826	0.955	0.917	0.95	0.951	0.021144	1.084	0.0115153	1.139	0.00061638
Zm00001d002478_P001	NDR1/HIN1-like 8	72.29	1.003	0.783	0.693	0.866	1.071	0.963	1.04	1.123	1.107	1.17	0.25656	1.319	0.060579	1.128	0.133844
Zm00001d022341_P001	NADH dehydrogenase [ubiquinone] flavoprotein 1 mitochondrial	55.267	1.297	1.27	1.307	1.007	1.05	0.965	0.974	0.877	1.018	0.78	0.00064471	0.741	0.0025641	0.949	0.35064
Zm00001d032504_P001	Monocopper oxidase-like protein SKU5	66.688	1.791	1.689		1.09	0.963		1.068	1.313		0.59	0.0163587	0.684	0.069901	1.16	0.35218
Zm00001d026472_P001	D-3-phosphoglycerate dehydrogenase 3 chloroplastic	63.923	0.518	0.746	0.698	1.064	0.966	1.027	0.963	0.988	1.049	1.558	0.0170628	1.529	0.0192191	0.981	0.64832
Zm00001d048272_P012	CTC-interacting domain 7	56.5	0.651		0.801	1.101		1.21	1.027		1.023	1.592	0.054241	1.412	0.183238	0.887	0.1285
Zm00001d041945_P004	transducin family protein / WD-40 repeat family protein	40.655
Zm00001d020444_P004	zinc ion binding GN=transcription regulators	34.23		0.712			0.846			1.047		1.188		1.471		1.238
Zm00001d044748_P002	Pyruvate dehydrogenase E1 component subunit alpha-1 mitochondrial	43.147		1.263	1.437		0.988	1.793		1.406	1.666	1.03	0.97192	1.138	0.35404	1.105	0.69628
Zm00001d010639_P002	Endoplasmic reticulum vesicle transporter protein	43.313	0.681		0.472	0.959		0.917	1.137		0.977	1.627	0.112397	1.833	0.088903	1.127	0.2776
Zm00001d032819_P001	calcium ion binding	71.226	1.097	0.975	1.199	0.983	0.993	0.927	1.057	1.064	1.021	0.887	0.141682	0.961	0.58	1.082	0.033517
Zm00001d013934_P001	soluble epoxide hydrolase	35.378	0.899	0.827	0.953	0.758	0.741	0.721	1.19	1.288	1.298	0.829	0.0129013	1.409	0.0022762	1.701	7.5508e-05
Zm00001d011816_P001	40S ribosomal protein S10-1	19.938	0.784	0.812	0.983	1.196	1.016	1.086	1.219	0.982	1.068	1.279	0.042617	1.268	0.065061	0.991	0.89974
Zm00001d048080_P005	Probable glucan 13-alpha-glucosidase	103.31	1.008	1.205	1.162	0.95	0.895	0.909	1.058	1.175	1.068	0.816	0.024855	0.978	0.76584	1.199	0.0089753
Zm00001d045783_P066	binding	157.68			0.805			1.133			1.11	1.407		1.379		0.98
Zm00001d043514_P001	Probable 3-hydroxyisobutyrate dehydrogenase-like 1 mitochondrial	32.08	0.644	0.373	0.756	0.919	0.829	0.876	0.955	1.105	0.849	1.48	0.182216	1.641	0.079075	1.109	0.2965
Zm00001d012277_P003	Actin-7	41.633	0.968	1.004	0.987	0.94	0.93	0.922	0.987	0.952	0.905	0.944	0.0082821	0.961	0.21492	1.019	0.52654
Zm00001d037163_P002	Transmembrane emp24 domain-containing protein p24delta4	23.204	1.106	1.024	1.02	0.869	0.889	0.923	1.035	1.002	1.062	0.851	0.0070983	0.984	0.63774	1.156	0.0039843
Zm00001d031317_P001	Transmembrane 9 superfamily member 12	74.815	0.879	0.892	0.928	1.049	1.094	1.031	1.039	0.96	1.116	1.176	0.0024798	1.154	0.037878	0.981	0.68698
Zm00001d051766_P001	E3 ubiquitin-protein ligase HOS1	29.073	1.157			0.996			1.025			0.861		0.886		1.029
Zm00001d022603_P002	DUF1279 family protein	16.034			1.146			0.827			1.004	0.722		0.876		1.214
Zm00001d037279_P011	Dynamin-2A	99.649	0.917	0.915	1.014	1.083	0.98	1.027	1.013	0.958	0.987	1.086	0.137176	1.039	0.35194	0.957	0.26256
ZemaCp100	uncharacterized protein	17.659	0.962	0.998	0.752	1.015	1.027	0.993	0.911	0.993	1.027	1.119	0.3113	1.081	0.42958	0.966	0.38558
Zm00001d005338_P004	Single-stranded nucleic acid binding R3H protein	49.488	1.272	1.009	0.714	0.866	1.044	1.059	0.793	0.926	0.972	0.991	0.93916	0.898	0.6653	0.906	0.33434
Zm00001d019534_P002	Serine carboxypeptidase-like 19	54.784	0.863	0.871	0.855	1.015	0.983	1.026	1.154	1.06	0.999	1.168	0.00036461	1.241	0.036683	1.062	0.2489
Zm00001d046898_P001	dihydrodipicolinate synthase1 cDNA complements E. coli mutant (AT997dapA-) blocked in DHPS (aka dhp1) GN= dps1	41.216	0.851	0.66	0.868	0.989	0.957	0.971	1.18	1.279	1.078	1.226	0.140124	1.487	0.016483	1.213	0.0193412
Zm00001d014906_P001	Phosphoinositide phospholipase C 4	61.737		0.933	0.834		1.278	1.296		0.988	1.027	1.457	0.021663	1.14	0.154758	0.783	0.0069815
Zm00001d052153_P001	YbaK/aminoacyl-tRNA synthetase-associated domain	33.5	1.156	1.075	1.076	0.894	0.94	0.909	0.844	0.949	0.883	0.829	0.0027162	0.809	0.007064	0.976	0.5279
Zm00001d035162_P001	LHT1	51.983	0.713			0.937			1.081			1.314		1.516		1.154
Zm00001d004541_P006	Zinc finger CCCH domain-containing protein 24	81.217
Zm00001d037872_P003	Protein BONZAI 3	57.057		1.215	1.048		1.248	1.359		1.172	1.068	1.152	0.23502	0.99	0.93082	0.859	0.137563
Zm00001d023557_P001	Alpha-(14)-fucosyltransferase	47.049			0.837			1.162			0.821	1.388		0.981		0.707
Zm00001d033633_P001	Haloacid dehalogenase-like hydrolase (HAD) superfamily protein	29.049	0.799		0.902	0.828		0.933	1.022		1.025	1.035	0.72276	1.203	0.199645	1.162	0.23792
Zm00001d023779_P001	3-hydroxyisobutyryl-CoA hydrolase 1	43.3	0.332	0.278	0.314	0.742	0.652	0.731	2.113	2.183	2.211	2.3	0.00023598	7.042	1.7552e-06	3.062	1.64496e-05
Zm00001d037867_P021	uncharacterized protein	98.763			1.122			1.067			1.198	0.951		1.068		1.123
Zm00001d032902_P001	Probable receptor-like protein kinase	41.475	1.098		0.605	1.139		0.957	1.278		1.095	1.231	0.50876	1.393	0.34986	1.132	0.39546
Zm00001d012710_P003	SGS domain-containing protein	19.382	0.913	0.822	0.755	0.778	0.727	0.759	0.918	0.813	0.968	0.909	0.188437	1.084	0.34334	1.192	0.034963
Zm00001d048194_P002	Acyl-CoA N-acyltransferases (NAT) superfamily protein	23.908	0.995	1.292	0.957	1.043	0.823	1.054	0.937	0.892	0.961	0.9	0.45552	0.86	0.21572	0.955	0.6601
Zm00001d043972_P001	50S ribosomal protein L12-1	18.858	0.884		0.918	0.927		0.893	0.662		0.889	1.01	0.74406	0.861	0.39274	0.852	0.36976
Zm00001d036798_P002	Tubulin binding cofactor C domain-containing protein	62.518	1.138		0.861	0.874		0.926	0.917		1.006	0.9	0.57128	0.962	0.85648	1.068	0.35336
Zm00001d034326_P001	Actin-depolymerizing factor 6	15.621			0.879			0.992			1.159	1.129		1.319		1.168
Zm00001d013945_P001	Ripening-related protein 3	20.849	1.001	1.023	0.896	0.391	0.595	0.446	0.706	0.684	0.285	0.49	0.0051165	0.574	0.169625	1.17	0.78454
Zm00001d002396_P006	Calcium-transporting ATPase 9 plasma membrane-type	108.34		0.847			1.099			1.193		1.298		1.409		1.086
Zm00001d002598_P001	Ubiquitin fusion degradation protein 1	35.581		0.838	0.933		1.047	0.973		1.036	0.877	1.141	0.178763	1.08	0.5277	0.947	0.59378
Zm00001d045210_P001	Dirigent	16.554	0.334	0.427	0.46	0.556	0.636	0.587	0.853	0.882	0.894	1.457	0.021178	2.153	0.0154964	1.478	0.00069949
Zm00001d047581_P002	30S ribosomal protein S1	43.49	0.867	0.931	0.968	1.076	0.942	0.943	0.949	0.833	0.831	1.07	0.2866	0.945	0.34816	0.882	0.115019
Zm00001d020011_P007	THO complex subunit 3	22.405	0.95		0.933	0.881		0.988	0.856		0.765	0.993	0.8902	0.861	0.117083	0.867	0.21826
Zm00001d012274_P001	hydroxycinnamoyltransferase10 GN= hct10	48.55	1.177	1.194	0.98	0.732	0.75	0.702	1.929	1.772	1.276	0.652	0.0030808	1.485	0.052858	2.279	0.023959
Zm00001d004460_P011	AAR2 protein family	26.398	0.903	0.859	0.913	0.605	0.676	0.704	0.642	0.906	0.642	0.742	0.0036156	0.819	0.140617	1.103	0.52126
Zm00001d017914_P001	H/ACA ribonucleoprotein complex subunit 2-like protein	16.355	0.564	0.731	0.496	1.2	1.272	1.27	1.065	0.97	1.122	2.089	0.00292	1.763	0.0089767	0.844	0.021365
Zm00001d009717_P001	Pectin lyase-like superfamily protein	46.99		0.868	0.621		0.64	0.617		0.49	0.735	0.844	0.45312	0.823	0.52334	0.975	0.8421
Zm00001d026610_P001	Dihydroorotate dehydrogenase	49.547	0.955	1.065	1.013	1.028	1.017	0.971	1.075	1.003	0.938	0.994	0.8977	0.994	0.90836	1	0.97834
Zm00001d023734_P001	glycine-rich protein2 GN= grp2	14.659			0.915			0.976			0.894	1.067		0.977		0.916
Zm00001d015120_P004	RuvB-like protein 1	49.851	1.048			0.862			0.918			0.823		0.876		1.065
Zm00001d031712_P018	uncharacterized protein	89.155		0.878	0.926		1.065	1.05		0.948	0.976	1.172	0.028595	1.067	0.166758	0.91	0.027985
Zm00001d015121_P002	ADP-ribosylation factor B1B	21.84	1.072	0.918	1.166	0.94	0.957	0.879	0.988	1.152	1.114	0.88	0.1718	1.031	0.71264	1.172	0.041882
Zm00001d041991_P001	Beta-fructofuranosidase insoluble isoenzyme CWINV3	69.219			0.745			1.075			1.043	1.443		1.4		0.97
Zm00001d030074_P001	fibrillin1 leaf cDNA csu653, moderate copy number, similar to plastid protein GN= fbn1	40.839	1.006	1.096	1.108	1.032	0.938	0.951	0.875	0.682	0.854	0.91	0.091603	0.751	0.026576	0.825	0.080601
Zm00001d018562_P006	Callose synthase 3	68.396	1.163		1.288	1.123		1.044	0.996		0.916	0.884	0.190064	0.78	0.064159	0.882	0.152441
Zm00001d015705_P001	uncharacterized protein	30.527			0.577			0.995			1.098	1.724		1.903		1.104
Zm00001d036447_P002	uncharacterized protein	20.09		0.628			1.087			1.019		1.731		1.623		0.937
Zm00001d042768_P001	Hevamine-A	31.264	0.705		0.516	1.167		1.271	0.908		0.847	1.997	0.049123	1.437	0.144023	0.72	0.026976
Zm00001d017072_P007	Protein NBR1 homolog	78.805		0.699			0.938			1.039		1.342		1.486		1.108
Zm00001d043502_P004	Golgin candidate 1	76.394		0.912			0.876			1.189		0.961		1.304		1.357
Zm00001d028612_P001	protein GN=Expressed protein	35.247	1.379	0.976	0.669	0.973	1.055	0.863	0.692	0.765	1.038	0.956	0.98126	0.825	0.53346	0.863	0.3042
Zm00001d027265_P007	ATPase 7 plasma membrane-type	100.05			0.566			1.461			1.253	2.581		2.214		0.858
Zm00001d013957_P001	Ser/Thr protein phosphatase family	45.393		0.799			1.138			0.963		1.424		1.205		0.846
Zm00001d049083_P005	F-box protein SKIP16	37.007		0.987	0.927		0.85	0.844		0.904	1.027	0.885	0.061217	1.009	0.92756	1.14	0.181063
Zm00001d013041_P002	Cytochrome b-c1 complex subunit 7	14.801	1.183	0.909	1.353	0.63	1.062	0.96	1.1	0.802	0.893	0.77	0.24076	0.811	0.24228	1.054	0.73138
Zm00001d020234_P001	THO complex subunit 6	40.849	0.672	0.663	0.208	1.007	0.977	1.223	1.086	1.111	0.876	2.078	0.096516	1.992	0.10982	0.958	0.69734
Zm00001d045825_P004	Has 30201 Blast hits to 17322 proteins in 780 species Archae - 12 GN=CONTAINS InterPro DOMAIN/s: Protein phosphatase 4 core regulatory subunit R2 (InterPro:IPR015267)	31.528	1.023	1.061		1.284	1.2		1.163	1.205		1.192	0.044917	1.136	0.037438	0.953	0.34038
Zm00001d047020_P018	ADP-ribosylation factor GTPase-activating protein AGD10	41.409			0.885			0.941			0.986	1.063		1.114		1.048
Zm00001d034446_P011	Guanylate-binding family protein	36.513
Zm00001d027423_P002	flavone synthase typeI2 Encodes a flavone synthase that is of the soluble Fe2+/2- oxoglutarate-dependent dioxygenase class GN= fnsi2	41.558	0.374			1.177			0.902			3.147		2.412		0.766
Zm00001d016121_P001	uncharacterized protein	16.062
Zm00001d047078_P003	Putative metacaspase family protein	35.654		0.837	0.716		0.897	1.052		1.026	0.807	1.255	0.178862	1.18	0.37624	0.94	0.6945
Zm00001d050455_P001	Anthranilate N-benzoyltransferase protein 1	50.917	0.313	0.112	0.402	1.036	1.127	1.153	1.488	1.65	1.527	4.01	0.060644	5.641	0.041659	1.407	0.00161769
Zm00001d017512_P003	YbaK/aminoacyl-tRNA synthetase-associated domain	25.639		1.154			1.007			1.206		0.873		1.045		1.198
Zm00001d032357_P001	Protein aq_1857	11.117	0.727	0.704	0.792	0.883	0.833	0.82	1.055	0.848	1.082	1.141	0.033744	1.343	0.026915	1.177	0.121943
Zm00001d034387_P005	aldehyde oxidase1 functionally cloned (Sekimoto et al 1997) GN= ao1	146.55	0.869			0.802			0.931			0.923		1.071		1.161
Zm00001d034760_P001	ferredoxin3 ubiquitous, cDNA clone, gene specific probe, amino acid sequence GN= fdx3	16.123	0.33	0.36	0.272	0.802	0.933	0.873	1.095	1.06	1.059	2.711	0.00043642	3.341	0.0047163	1.232	0.0095359
Zm00001d044971_P016	Putative transcription elongation factor SPT5 homolog 1	24.368		0.642			1.231			1.202		1.917		1.872		0.976
Zm00001d014367_P005	Decaprenyl-diphosphate synthase subunit 1	35.258	0.591			0.756			0.899			1.279		1.521		1.189
Zm00001d007824_P001	60S ribosomal protein L4-1	44.411	1.125	1.175	1.226	1.147	1.133	1.094	1.046	1.043	0.952	0.957	0.20142	0.862	0.020116	0.901	0.037041
Zm00001d019542_P003	COP1-interacting protein-related	98.123	1.034			1.085			0.943			1.049		0.912		0.869
Zm00001d036831_P012	E3 ubiquitin-protein ligase RGLG1	28.399			0.548			1.197			1.003	2.184		1.83		0.838
Zm00001d018400_P001	uncharacterized protein	11.928			0.657			1.165			1.187	1.773		1.807		1.019
Zm00001d043511_P001	hexokinase5 GN= hex5	55.041	1	1.012	1.033	0.988	0.913	0.846	0.916	0.875	1.009	0.902	0.083742	0.92	0.117803	1.019	0.76854
Zm00001d040513_P001	Has 1807 Blast hits to 1807 proteins in 277 species Archae - 0 GN=BEST Arabidopsis thaliana protein match is: glycosyltransferase family protein 2 (TAIR:AT5G60700.1)	70.144
Zm00001d047453_P003	Villin-2	103.23		0.274	0.288		1.709	1.536		1.184	1.161	5.774	0.00112387	4.173	0.00035552	0.723	0.027002
Zm00001d029878_P001	O-fucosyltransferase family protein	56.171
Zm00001d036496_P002	Choline monooxygenase chloroplastic	40.235	0.942	1.099	0.521	0.97	1.237	1.327	1.02	1.129	1.083	1.379	0.21712	1.262	0.34742	0.915	0.45874
Zm00001d027734_P003	Probable receptor-like protein kinase	40.501			1.294			0.957			0.42	0.74		0.325		0.439
Zm00001d013318_P003	E3 ubiquitin-protein ligase HOS1	69.957			0.576			1.06			1.091	1.84		1.894		1.029
Zm00001d029516_P004	Probable galacturonosyltransferase 11	51.999	0.942		1.039	0.902		1.014	0.946		1.044	0.967	0.7006	1.005	0.95408	1.039	0.6656
Zm00001d050368_P001	HMG-Y-related protein A	19.084	1.217	1.237	1.548	1.138	1.282	1.225	0.767	0.661	0.778	0.911	0.35688	0.551	0.0031808	0.605	0.00129851
Zm00001d044584_P022	Callose synthase 7	209.3	1.017	0.929	1.028	1.062	1.123	1.017	1.031	1.128	1.036	1.077	0.160598	1.074	0.173224	0.998	0.95928
Zm00001d038085_P001	Protein RETICULATA-RELATED 4 chloroplastic	41.216	1.103		1.086	0.948		0.985	0.771		0.721	0.883	0.026438	0.682	0.0079406	0.772	0.021445
Zm00001d047210_P002	Putative metacaspase family protein	25.937			0.694			0.538			0.578	0.775		0.833		1.074
Zm00001d038273_P003	Coronatine-insensitive protein 1	46.758			0.974			0.856			0.884	0.879		0.908		1.033
Zm00001d011886_P001	Putative O-Glycosyl hydrolase superfamily protein	29.685		0.866			0.787			1.007		0.909		1.163		1.28
Zm00001d036978_P001	HAD superfamily subfamily IIIB acid phosphatase	29.579	0.955	1.078	1.099	0.979	0.936	0.986	0.833	1.068	0.841	0.926	0.184962	0.875	0.21004	0.945	0.49042
Zm00001d043787_P001	Glutathione S-transferase GSTU6	26.081	0.767	0.915	0.595	0.934	1.03	0.948	1.065	1.062	1.187	1.279	0.112798	1.455	0.040315	1.138	0.05374
Zm00001d033775_P003	Probable phosphoribosylformylglycinamidine synthase chloroplastic/mitochondrial	155.4		1.095	0.928		0.874	0.957		0.923	0.947	0.905	0.41072	0.924	0.46336	1.021	0.68634
Zm00001d002967_P015	AFG1-like ATPase family protein	57.151	0.969	1.058	1.14	1.015	1.01	1.032	1.084	0.908	1.018	0.965	0.55638	0.95	0.504	0.985	0.76196
Zm00001d019495_P015	Myosin-6	113.63
Zm00001d042262_P004	Retrovirus-related Pol polyprotein LINE-1	60.69	1.114	0.793	1.153	1.014	0.959	0.881	1.093	1.098	1.161	0.933	0.67144	1.095	0.4368	1.174	0.023103
Zm00001d028359_P001	Transmembrane 9 superfamily protein member 1	67.497	1.034	0.932	0.692	1.085	1.051	0.737	1.055	1.003	1.418	1.081	0.67848	1.308	0.169896	1.21	0.30506
Zm00001d047067_P002	chloroplast chaperonin 10	14.436		1.117			0.766			0.906		0.686		0.811		1.183
Zm00001d005240_P008	Protein phosphatase 2C 70	21.397		0.796			1.006			0.922		1.264		1.158		0.917
Zm00001d038327_P001	Proteinase inhibitor propeptide	13.915	0.715	1.049	1.116	1.899	1.169	1.079	0.693	1.251	1.199	1.44	0.194142	1.091	0.77468	0.758	0.34404
Zm00001d015962_P001	prolyl oligopeptidase family protein	88.921	1.103	1.096	1.073	0.907	0.922	0.894	1.003	1.015	1.009	0.832	0.000116718	0.925	0.00099635	1.112	0.00037784
ZemaCp051	uncharacterized protein	7.787
Zm00001d045314_P001	Probable thiol methyltransferase 2	28.003	0.782	0.754	0.852	0.718	0.782	0.75	0.888	1.014	0.94	0.942	0.25058	1.19	0.030137	1.263	0.0069995
Zm00001d002396_P026	Calcium-transporting ATPase 9 plasma membrane-type	53.508			0.782			0.99			0.964	1.266		1.233		0.974
Zm00001d036547_P001	Translation machinery associated TMA7	6.7318	0.929	1.052	1.03	1.011	0.925	0.967	0.975	1.093	1.29	0.964	0.48246	1.115	0.31216	1.157	0.176743
Zm00001d034318_P001	GTP-binding protein-related	46.833	1.072	1.082	1.126	1.049	1.074	1.056	0.993	1.063	0.955	0.969	0.134742	0.918	0.067882	0.947	0.160261
Zm00001d042530_P004	Membrane-associated protein VIPP1 chloroplastic	26.26	0.806			0.909			0.911			1.128		1.13		1.002
Zm00001d030774_P003	RNA-binding (RRM/RBD/RNP motifs) family protein	67.852	1.039	1.076	0.905	1.083	1.073	0.927	0.895	0.877	0.952	1.021	0.78884	0.902	0.158225	0.884	0.095418
Zm00001d033367_P001	Metal transporter Nramp3	59.22	0.952			0.822			1.434			0.863		1.506		1.745
Zm00001d052242_P001	ATP synthase subunit delta chloroplastic	26.72	0.884	1.046	1.023	1	1.103	1.023	0.731	0.7	0.655	1.059	0.3864	0.706	0.0049646	0.667	0.00074329
Zm00001d013751_P005	UDP-arabinopyranose mutase 3	41.254	0.997	0.927	0.914	0.87	1.127	0.94	1.132	1.04	1.098	1.035	0.73888	1.152	0.0179232	1.113	0.23442
Zm00001d027922_P002	Eukaryotic translation initiation factor 3 subunit K	21.703	1.266	1.361	1.065	1.443	1.455	1.342	1.64	1.818	1.782	1.148	0.137542	1.419	0.011082	1.236	0.0065232
Zm00001d005812_P003	sterile alpha motif (SAM) domain-containing protein	25.574	1.059	1.09	1.045	1.022	0.857	0.981	0.852	0.816	0.815	0.895	0.107243	0.777	0.00019716	0.868	0.065659
Zm00001d011096_P025	argonaute1 Proposed to interact with small RNAs in dorsiventral leaf patterning GN= ago1	107.3	0.866		0.663	1.131		1.081	1.215		0.998	1.447	0.108042	1.447	0.15298	1	0.97112
Zm00001d034856_P006	elongation factor TU mitochondrial1 genomic sequence, low copy numberl SSR umc2100 GN= tufm1	48.483	1.176	1.396	1.298	0.967	0.854	1.03	0.852	0.905	0.909	0.737	0.0145186	0.689	0.002342	0.935	0.33464
Zm00001d013336_P001	Zinc finger BED domain-containing protein DAYSLEEPER	83.178	1.157	1.429		0.735	1.088		1.142	1.017		0.705	0.24454	0.835	0.28026	1.184	0.45786
Zm00001d003894_P004	Double Clp-N motif-containing P-loop nucleoside triphosphate hydrolases superfamily protein	102.1	0.738	0.628	0.351	0.573	1.103	0.832	0.946	0.887	0.975	1.461	0.2553	1.635	0.14148	1.12	0.5225
Zm00001d045315_P004	Proteasome subunit beta type	24.42	1.051	1.05	0.857	1.005	0.945	1.039	0.978	1.088	1.026	1.01	0.85634	1.045	0.55582	1.034	0.4623
Zm00001d021952_P003	Calcium-dependent lipid-binding (CaLB domain) family protein	43.434	0.845	0.825	0.842	1.015	0.978	1.068	0.734	0.803	0.713	1.219	0.0017637	0.896	0.038124	0.735	0.0021752
Zm00001d041495_P002	SRP40 carboxy-terminal domain protein	39.092	0.367			1.254			1.284			3.417		3.499		1.024
Zm00001d025761_P004	NAD(P)-binding Rossmann-fold superfamily protein	31.592	0.77	0.507		0.782	0.865		1.018	0.849		1.29	0.32934	1.462	0.22322	1.134	0.35932
Zm00001d037453_P001	Reticulon	28.153			0.665			0.581			0.623	0.874		0.937		1.072
Zm00001d021787_P002	Sphingosine kinase 1	53.873	1.098	1.021	0.771	1.148	1.108	1.034	1.064	1.198	1.062	1.138	0.27994	1.15	0.26308	1.01	0.85782
Zm00001d009511_P001	uncharacterized protein	102.29			0.523			1.222			1.298	2.337		2.482		1.062
Zm00001d017456_P015	ypt homolog4 GN= ypt4	22.476		0.558			1.054			1.099		1.889		1.97		1.043
Zm00001d000227_P001	Pyruvate dehydrogenase E1 component subunit beta	35.127	1.073	0.839	0.894	1.081	1.106	1.111	1.07	1.377	1.02	1.175	0.153322	1.236	0.154481	1.051	0.70274
Zm00001d032781_P005	uncharacterized protein	29.08	1.031	0.98	0.783	1.005	1.064	1.037	1.208	1.041	1.222	1.112	0.26138	1.242	0.089196	1.118	0.115204
Zm00001d051702_P001	BSD domain-containing protein	32.996			0.816			1.138			1.156	1.395		1.417		1.016
Zm00001d024891_P001	Beta-glucosidase 17	62.797	2.368	1.378	1.912	1.204	1.191	1.013	0.541	0.319	0.284	0.602	0.043758	0.202	0.003098	0.336	0.0053834
Zm00001d053453_P002	Phosphoenolpyruvate carboxylase isoform 1%3B Phosphoenolpyruvate carboxylase isoform 2	101.83
Zm00001d029958_P001	UDP-glycosyltransferase TURAN	55.745			0.298			1.103			1.345	3.701		4.513		1.219
Zm00001d044527_P001	uncharacterized protein	26.091	1.339			0.999			1.724			0.746		1.288		1.726
Zm00001d019563_P015	Aquaporin PIP2-1	24.354	1.37	1.611	1.443	1.126	0.841	0.76	0.758	0.616	0.524	0.616	0.0175589	0.429	0.00186205	0.696	0.086598
Zm00001d048356_P001	24-methylenesterol C-methyltransferase 2	41.165	0.706	0.654	0.657	1.14	0.802	1.195	0.854	0.765	0.782	1.555	0.02908	1.19	0.0141427	0.765	0.12358
Zm00001d048898_P001	F-box/kelch-repeat protein SKIP11	47.731	0.785		0.619	1.057		1.467	0.997		1.03	1.798	0.103217	1.444	0.089178	0.803	0.33742
Zm00001d032748_P005	Nucleolin 2	20.55	0.344	0.599		0.779	0.743		2.54	2.266		1.614	0.20468	5.097	0.027721	3.158	0.0028807
Zm00001d052075_P002	60S ribosomal protein L35a-2	12.797	1.116	1.047	1.063	1.109	1.012	1.088	0.915	0.813	0.906	0.995	0.87494	0.816	0.00866	0.821	0.013543
Zm00001d028668_P001	phosphoinositide binding	34.083	0.614	0.565	0.576	1.23	1.235	1.142	1.039	1.049	0.993	2.055	3.7933e-05	1.756	4.4657e-05	0.854	0.0067606
Zm00001d007270_P001	clathrin coat assembly protein AP17 single copy GN= ap17	17.052		0.913			1.084			0.969		1.187		1.061		0.894
Zm00001d042820_P003	Exostosin family protein	20.627			1.124			1.056			0.916	0.94		0.815		0.867
Zm00001d040290_P003	Epoxide hydrolase 2	36.177	0.77	0.788		1.047	1.056		1.115	0.94		1.35	0.00168113	1.319	0.086637	0.977	0.78416
Zm00001d014183_P010	Probable prolyl 4-hydroxylase 12	15.531			0.213			1.074			1.514	5.042		7.108		1.41
Zm00001d021446_P002	Protein DETOXIFICATION 45 chloroplastic	60.776			0.451			1.264			1.263	2.803		2.8		0.999
Zm00001d044506_P004	Protein MICRORCHIDIA 6	17.982		0.526			1.452			1.669		2.76		3.173		1.149
Zm00001d011445_P009	Peptide deformylase 1B chloroplastic/mitochondrial	29.227	0.82	0.948		0.902	0.977		0.898	0.848		1.063	0.5278	0.988	0.90696	0.929	0.27564
Zm00001d041088_P005	WEB family protein	71.521		0.386			1.208			1.003		3.13		2.598		0.83
Zm00001d032472_P004	Prolyl carboxypeptidase like protein	56.099	1.034	1.111	0.963	1.033	0.982	1.045	0.989	0.926	0.963	0.985	0.77006	0.926	0.172044	0.941	0.085764
Zm00001d006683_P001	UDP-glycosyltransferase 78D2	49.14	0.813	0.743	0.894	0.886	0.87	0.798	0.839	0.905	0.769	1.042	0.52508	1.026	0.73306	0.984	0.77606
Zm00001d046855_P001	GDP-L-fucose synthase 1	35.711	1.162	1.157	1.19	1.094	1.106	1.034	1.065	1.046	1.061	0.922	0.022279	0.904	0.00061645	0.981	0.4291
Zm00001d033345_P007	nucleotidyltransferases GN=transferases	49.076	1.055	1.194	1.022	1.051	1.053	0.987	0.929	0.981	0.957	0.945	0.3516	0.876	0.060279	0.928	0.047081
Zm00001d011188_P001	3'-5' exonuclease domain-containing protein / K homology domain-containing protein / KH domain-containing protein	38.107	1.138	1.156	1.084	0.943	0.915	1.004	0.903	1.009	0.956	0.847	0.007704	0.849	0.0117951	1.002	0.96762
Zm00001d010406_P001	minichromosome maintenance6 Essential for both vegetative as well as reproductive growth and development in plants. GN= mcm6	86.517	0.639	1.028		1.232	1.18		1.196	0.982		1.447	0.23804	1.307	0.37614	0.903	0.40128
Zm00001d052445_P041	ARM repeat superfamily protein	172.75	0.883	1.064		0.949	1.088		1.093	1.113		1.046	0.72264	1.133	0.30182	1.083	0.35636
Zm00001d033084_P002	uncharacterized protein	13.514	1.338		0.927	1.283		1.091	1.29		1.069	1.048	0.79156	1.042	0.82114	0.994	0.9575
Zm00001d029597_P003	Leucine-rich repeat (LRR) family protein	21.073		0.599			1.174			1.374		1.96		2.294		1.17
Zm00001d032440_P007	Protein kinase superfamily protein	11.925		0.77			0.981			1.103		1.274		1.432		1.124
Zm00001d047214_P001	Chaperone DnaJ-domain superfamily protein	41.665	1.284	1.165	1.173	0.987	1.045	1.001	0.814	0.821	0.821	0.837	0.0077806	0.678	0.0065356	0.81	0.00026364
Zm00001d045706_P005	Restorer of fertility2	55.693	1.034	1.04	1.054	0.929	0.916	0.928	1.028	1.034	1.043	0.887	7.8628e-05	0.993	0.35594	1.12	5.6271e-05
Zm00001d011362_P002	PsbP domain-containing protein 5 chloroplastic	34.205	0.939	0.779	0.643	0.886	0.844	1.322	1.016	0.922	0.938	1.293	0.23954	1.218	0.139904	0.942	0.80026
Zm00001d052194_P001	23.6 kDa heat shock protein mitochondrial	23.816	0.855	0.903	1.055	0.886	0.987	1.023	0.862	0.906	0.778	1.03	0.70332	0.905	0.2749	0.879	0.107125
Zm00001d037214_P008	Putative ARM repeat-containing protein containing family protein	203.97			1.288			1.111			0.889	0.863		0.69		0.8
Zm00001d003669_P001	BEST Arabidopsis thaliana protein match is Late embryogenesis abundant (LEA) hydroxyproline-rich glycoprotein family (TAIRAT4G35170.1) GN=CONTAINS InterPro DOMAIN/s: Late embryogenesis abundant protein group 2 (InterPro:IPR004864)	35.499			0.725			1.405			1.307	1.938		1.803		0.93
Zm00001d027966_P001	Protein CutA chloroplastic	18.987	1.295	1.346	1.277	0.77	0.888	0.864	0.943	0.872	0.948	0.644	0.00067942	0.705	0.00036181	1.096	0.146324
Zm00001d036091_P001	root cap protein1 GN= rcp1	41.834	0.937	0.957	0.977	0.9	0.918	0.948	1.187	1.208	0.997	0.963	0.126001	1.181	0.059199	1.226	0.033616
Zm00001d031525_P006	Oligouridylate-binding protein 1C	34.607	1.183			0.915			0.782			0.773		0.661		0.855
Zm00001d014718_P001	Thylakoid lumenal 16.5 kDa protein chloroplastic	25.403	0.491	0.728	0.771	0.879	1.078	0.945	0.949	0.906	0.904	1.458	0.063139	1.386	0.136441	0.951	0.4877
Zm00001d045042_P017	Sucrose synthase 1	87.354	1.079		1.075	0.896		0.904	1.185		1.167	0.836	0.00071947	1.092	0.0079248	1.307	0.00109656
Zm00001d048311_P003	sucrose transporter7 single copy cDNA GN= sut7	56.11			0.513			1.191			1.28	2.322		2.495		1.075
Zm00001d028173_P001	FRIGIDA-like protein 1	50.309	0.661	0.621		1.044	1.103		1.05	1.097		1.675	0.0064398	1.675	0.0054185	1	0.99722
Zm00001d052170_P001	Galactoside 2-alpha-L-fucosyltransferase	66.514			0.948			1.01			0.976	1.065		1.03		0.966
Zm00001d046889_P010	Protein STRUBBELIG-RECEPTOR FAMILY 1	15.187
Zm00001d053609_P044	Putative coatomer beta subunit family protein	97.58		0.726	1.381		1.247	0.952		1.133	1.025	1.044	0.83116	1.024	0.84232	0.981	0.94608
Zm00001d024208_P005	Alpha-humulene/(-)-(E)-beta-caryophyllene synthase	41.804			0.352			0.406			0.391	1.153		1.111		0.963
Zm00001d036181_P001	nucleotide binding GN=ATP-dependent peptidases	62.559	1.066			0.958			0.934			0.899		0.876		0.975
Zm00001d013083_P023	5'-3' exoribonuclease 4	40.899			1.017			0.684			1.304	0.673		1.282		1.906
Zm00001d032591_P004	Endosomal targeting BRO1-like domain-containing protein	93.08	0.877			1.026			1.121			1.17		1.278		1.093
Zm00001d042654_P012	Beta-galactosidase	75.711		0.9	1.006		1.089	1.038		0.875	0.794	1.116	0.20864	0.876	0.21496	0.785	0.046138
Zm00001d018488_P003	cytochrome P450 14 encodes CYP97C GN= cyp14	69.35
Zm00001d048890_P002	Acyl-coenzyme A oxidase	67.543
Zm00001d021624_P017	tRNA wybutosine-synthesizing protein 2/3/4	99.249		0.804			0.794			0.889		0.988		1.106		1.12
Zm00001d005151_P003	aspartate kinase2 lysine-threonine resistance GN= ask2	50.048		0.873	0.421		0.972	1.291		0.887	0.92	1.749	0.25718	1.396	0.38872	0.798	0.27154
Zm00001d026243_P002	Multiple organellar RNA editing factor 2 chloroplastic	24.588	0.615	0.55	0.698	0.819	1.191	1.021	0.897	1.041	0.99	1.627	0.020298	1.572	0.0050602	0.966	0.84252
Zm00001d018233_P014	Probable cyclic nucleotide-gated ion channel 20 chloroplastic	32.417	0.677			1.123			0.87			1.659		1.285		0.775
Zm00001d048691_P001	WD repeat-containing protein VIP3	31.196	1.12	1.173	1.329	1.225	1.08	0.697	1.168	0.752	1.033	0.829	0.29878	0.815	0.196115	0.984	0.98122
Zm00001d053107_P003	Tyrosine aminotransferase	31.178		0.97			1.139			1.195		1.174		1.232		1.049
Zm00001d044315_P013	SNF1-related protein kinase regulatory subunit gamma-1-like	40.743	1.098	1.206	1.174	1.002	1.046	1.022	0.949	0.951	0.937	0.883	0.0152635	0.816	0.00199747	0.924	0.0040183
Zm00001d033652_P001	Probable LRR receptor-like serine/threonine-protein kinase	67.155	0.997	1.172	1.174	1.227	1.283	1.132	0.962	0.934	1.002	1.089	0.25334	0.867	0.072384	0.796	0.0055821
Zm00001d049320_P001	multi-protein bridging factor homolog1 endosperm cDNA 5C01C06 (uaz246), similar to MBF1 of Bombyx mori GN= mbf1	15.662	0.922		0.954	1.041		0.955	0.884		0.959	1.064	0.31756	0.982	0.71688	0.923	0.31134
Zm00001d019681_P001	Cyclin-L1-1	18.627		0.769			1.163			0.947		1.512		1.231		0.814
Zm00001d009517_P001	Ribosomal protein L1p/L10e family	86.728		0.991			1.126			0.905		1.136		0.913		0.804
Zm00001d052651_P001	Probable xyloglucan endotransglucosylase/hydrolase protein 5	34.102	0.971	1.004	0.989	0.322	0.426	0.422	0.5	0.511	0.454	0.395	0.0095434	0.494	4.3717e-05	1.252	0.078737
Zm00001d046587_P030	transducin family protein / WD-40 repeat family protein	56.893
Zm00001d013019_P004	Mitochondrial Rho GTPase	71.809	0.518	0.84	0.707	0.83	0.838	0.963	0.932	1.025	0.875	1.274	0.157537	1.371	0.088615	1.076	0.32904
Zm00001d024160_P001	Transcription factor TGA4	42.528	0.978	1.492	1.026	1.17	1.276	0.921	1.08	0.977	0.534	0.963	0.8721	0.741	0.27428	0.77	0.28412
Zm00001d051995_P001	proliferating cell nuclear antigen2 a cell cycle gene regulated by tb1 GN= pcna2	29.313	1.074	1.025		0.931	0.94		0.969	0.92		0.891	0.040564	0.9	0.094279	1.01	0.75942
Zm00001d029648_P001	copalyl diphosphate synthase2 encodes ent-kaurene synthase, a copalyl diphosphate synthase protein having close identity with An1 gene product GN= cpps2	95.134	0.377	0.514	0.384	0.861	0.785	0.759	1.415	1.331	1.406	1.886	0.0038802	3.256	0.00031552	1.726	0.00020405
Zm00001d015020_P005	AUGMIN subunit 4	45.069	0.782			1.168			0.979			1.494		1.252		0.838
Zm00001d037455_P003	N-(5'-phosphoribosyl)anthranilate isomerase	28.575	1.235	1.074	1.197	1.004	1.065	1.01	1.327	1.179	1.183	0.878	0.050078	1.052	0.42394	1.198	0.0141237
Zm00001d047797_P010	UDP-glucuronic acid decarboxylase 5	39.326	1.13	1.14	1.213	1.049	1.028	1.036	1.079	1.095	1.125	0.894	0.0083449	0.947	0.101324	1.06	0.0129753
Zm00001d047758_P005	MAP kinase1 cDNA sequence GN= mpk1	38.589	0.883	0.749		0.982	1.081		1.152	1.128		1.264	0.131059	1.397	0.055385	1.105	0.17602
Zm00001d021558_P001	(S)-ureidoglycine aminohydrolase	38.778	1.18	0.945	1.07	1.069	0.935	1.043	0.957	0.994	0.936	0.954	0.58714	0.904	0.21686	0.947	0.30516
Zm00001d023689_P006	SGF29 tudor-like domain	17.137	0.971			0.996			0.834			1.026		0.859		0.837
Zm00001d046318_P001	Putative FAD-binding Berberine family protein	57.624	0.376	0.345	0.387	1.189	1.084	1.131	1.287	1.412	1.311	3.072	1.67775e-05	3.619	4.314e-06	1.178	0.0136392
Zm00001d017175_P004	La protein 1	48.176	1.09	0.924		0.973	1.084		1.118	1.024		1.021	0.8369	1.064	0.56422	1.041	0.61566
Zm00001d011643_P001	Putative leucine-rich repeat receptor-like protein kinase family protein	118.7
Zm00001d015956_P001	NAD(P)-binding Rossmann-fold superfamily protein	36.374	1.054	0.96	0.921	0.895	0.963	0.891	0.97	0.971	0.998	0.937	0.24332	1.001	0.94736	1.069	0.066137
Zm00001d030173_P001	Calmodulin-binding receptor-like cytoplasmic kinase 3	41.48	0.809	1.228		1.081	1.029		1.056	1.033		1.036	0.81314	1.026	0.8437	0.99	0.75234
Zm00001d007881_P006	TatD related DNase	35.779	1.018	1.181	1.119	1.113	1.233	1.1	1.152	1.142	1.216	1.039	0.53444	1.058	0.29224	1.019	0.66336
Zm00001d025877_P001	splicing factor Prp18 family protein	32.087	0.916	1.031	0.982	1.111	1.187	1.257	0.925	1.029	0.967	1.214	0.0173793	0.997	0.95912	0.822	0.0141986
Zm00001d054043_P007	Binding protein homolog2 cDNA, SSR umc1058 GN=bip2	73.126	0.867	0.85	0.788	1.121	1.173	1.158	1.15	1.235	1.217	1.378	0.00055948	1.438	0.00056033	1.043	0.174041
Zm00001d025474_P003	Chloride channel protein CLC-c	86.291		0.975			0.936			1.133		0.96		1.162		1.21
Zm00001d002340_P005	Cell differentiation Rcd1-like protein	14.574	1.063	1.28	0.823	0.931	1.066	0.993	1.046	0.924	1.219	0.944	0.7663	1.007	0.91612	1.067	0.54094
Zm00001d021695_P001	O-Glycosyl hydrolases family 17 protein	68.627	0.681	0.643	0.586	0.915	0.694	0.913	1.053	0.916	1.053	1.32	0.055699	1.582	0.00198412	1.198	0.143435
Zm00001d014983_P001	Serine carboxypeptidase-like 49	56.727	1.709	1.793	1.68	1.038	1.019	1.043	1.165	0.954	1.027	0.598	1.78926e-05	0.607	0.00122281	1.015	0.86468
Zm00001d034740_P001	soluble epoxide hydrolase	37.165	0.945		0.939	0.978		0.977	0.997		0.938	1.038	0.0075175	1.027	0.48218	0.99	0.78434
Zm00001d021018_P006	60S ribosomal protein L32-1	15.767	0.49	0.422	0.952	0.933	1.041	1.064	1.451	1.471	1.25	1.63	0.09454	2.238	0.027235	1.373	0.0087596
ZemaCp058	uncharacterized protein	15.638	1.067	0.902	0.946	0.946	0.944	0.996	0.771	0.673	0.767	0.99	0.8903	0.758	0.0145793	0.766	0.0049638
Zm00001d038114_P002	Peroxisomal adenine nucleotide carrier 1	17.685		0.754			0.628			1.179		0.833		1.564		1.877
Zm00001d035875_P004	Membrane protein of ER body-like protein	62.103
Zm00001d024903_P001	heat shock protein, 90 kDa heat-induced GN= hsp90	81.802	0.771	0.696	0.691	1.235	1.195	1.277	0.932	0.877	0.911	1.718	0.000177853	1.26	0.0042002	0.734	0.00028497
Zm00001d045403_P002	Proteasome subunit beta type-6	25.961	0.985	1.085	1.096	0.85	0.757	1.153	1.068	0.91	1.104	0.872	0.30666	0.973	0.69226	1.117	0.42608
Zm00001d038442_P001	Protein LIGHT-DEPENDENT SHORT HYPOCOTYLS 5	25.626	0.873	0.872	0.93	1.193	1.036	1.02	0.742	1.171	1.028	1.215	0.023803	1.099	0.62954	0.905	0.47134
Zm00001d025024_P020	EXPRESSED IN 24 plant structures GN=LOCATED IN: vacuole	101.22	1.012			1.027			1.218			1.015		1.204		1.186
Zm00001d029328_P029	RNA-binding KH domain-containing protein	57.813	0.963	1.044	1.004	0.983	1.032	1.052	1.024	0.971	0.982	1.019	0.57968	0.989	0.7162	0.971	0.3157
Zm00001d038361_P001	Integral membrane Yip1 family protein	31.722			1.046			0.952			0.812	0.91		0.776		0.853
Zm00001d025398_P003	Exocyst complex component SEC5A	110.09	0.982	0.774		1.403	1.349		1.484	1.358		1.567	0.063343	1.618	0.061657	1.033	0.58394
Zm00001d020256_P001	P-loop containing nucleoside triphosphate hydrolases superfamily protein	62.929	0.664		0.81	1.1		0.978	1.166		1.106	1.41	0.095342	1.541	0.051099	1.093	0.29484
Zm00001d019432_P006	Zn-dependent exopeptidases superfamily protein	87.914	0.817	0.915	0.945	0.9	0.878	0.904	1.094	1.114	0.997	1.002	0.93838	1.197	0.031921	1.195	0.0075958
Zm00001d003262_P005	Steroid nuclear receptor ligand-binding	65.28	1.224			1.011			1.058			0.826		0.864		1.046
Zm00001d042143_P001	glucan endo-1,3-beta-glucosidase homolog1 cDNA sequence homologous to 1,3-beta glucanase, possibly single copy GN= geb1	34.619	0.364	0.266	0.566	0.962	0.914	0.988	1.682	1.553	1.663	2.395	0.052679	4.095	0.022117	1.71	9.6067e-05
Zm00001d036602_P001	Protein kinase superfamily protein	42.471		0.859			1.342			1.128		1.562		1.313		0.841
Zm00001d036535_P001	oxygen evolving complex, 33kDa subunit (was umc172) cDNA identified by hybrid-selection, in vitro translation and immunoprecipitation with antisera against spinach OEC33 GN= oec33	34.519	1.074	1.097	1.114	1.156	1.054	1.03	0.836	0.984	0.803	0.986	0.70576	0.798	0.022156	0.81	0.040179
Zm00001d042685_P004	glutamate-oxaloacetate transaminase4 putative aspartate aminotransferase GN= got4	38.622	1.256	1.705		0.898	1.023		1.075	1.289		0.649	0.125704	0.798	0.3454	1.231	0.20726
Zm00001d011692_P001	Glycylpeptide N-tetradecanoyltransferase	49.222	1.401	1.151	1.189	0.95	1.059	1.094	1.038	0.924	1.027	0.829	0.067483	0.799	0.035697	0.963	0.5488
Zm00001d037950_P017	Serine/threonine-protein kinase TOR	205.46			1.044			1.103			0.983	1.057		0.942		0.891
Zm00001d006565_P002	male sterile32 like ms1 GN= ms32	51.428	0.862	0.711	0.759	1.117	0.897	1.191	1.082	1.117	1.32	1.374	0.037835	1.509	0.0079816	1.098	0.41158
Zm00001d023520_P009	Transducin/WD40 repeat-like superfamily protein	52.012	1.03			0.984			1.03			0.955		1		1.047
Zm00001d018334_P002	Nuclear transport factor 2 (NTF2) family protein	26.88
Zm00001d044304_P005	Eukaryotic aspartyl protease family protein	35.303	1.339			0.859			1.07			0.642		0.799		1.246
Zm00001d003181_P002	Cytochrome b561 and DOMON domain-containing protein	40.936	1.544	1.328	1.454	1.242	1.028	1.398	0.916	1.038	1.095	0.848	0.161365	0.705	0.0069552	0.831	0.159041
Zm00001d011180_P003	uncharacterized protein	19.551	1.098	1.071	1.005	0.96	1.02	1.112	1.003	1.023	1.027	0.974	0.61486	0.962	0.23466	0.987	0.81318
Zm00001d037189_P003	Peptidyl-prolyl cis-trans isomerase CYP40	30.152	0.802			1.054			1.14			1.314		1.421		1.082
Zm00001d027667_P012	citrate transporter1 GN= citt1	51.836		0.535	0.587		2.4	2.268		0.701	0.564	4.16	0.00144375	1.127	0.43278	0.271	0.007261
Zm00001d007214_P002	Mitochondrial import inner membrane translocase subunit TIM44-2	49.824	1.004		0.962	1.012		1.006	0.979		0.829	1.026	0.34664	0.92	0.41754	0.896	0.40318
Zm00001d047894_P001	Protein CHAPERONE-LIKE PROTEIN OF POR1 chloroplastic	26.824			1.024			0.918			0.897	0.896		0.876		0.977
Zm00001d003839_P003	uncharacterized protein	47.768	1.167	1.036	1.182	0.845	0.887	0.836	0.759	0.726	0.759	0.759	0.003865	0.663	0.00077771	0.874	0.0045646
Zm00001d051927_P002	Nicotinamide/nicotinic acid mononucleotide adenylyltransferase	14.174		0.645			1.039			1.204		1.611		1.867		1.159
Zm00001d037227_P006	DCD (Development and Cell Death) domain protein	64.387	1.026	1.018	1.014	1.119	1.131	0.989	0.873	0.734	0.867	1.059	0.32628	0.809	0.063215	0.764	0.0190447
Zm00001d031749_P003	Pyridoxal phosphate (PLP)-dependent transferases superfamily protein	55.956	1.488	1.412	1.502	1.107	1.153	1.118	0.838	0.837	0.847	0.767	0.00031769	0.573	4.5679e-06	0.747	2.1019e-05
Zm00001d034970_P002	LOCATED IN mitochondrion endoplasmic reticulum plasma membrane vacuole GN=INVOLVED IN: protein processing	67.712		0.982			0.849			1.101		0.865		1.121		1.297
Zm00001d045085_P002	Serine carboxypeptidase-like 29	52.658	1.036	1.072	1.062	0.906	0.936	1.009	1.046	1.113	1.009	0.899	0.033018	0.999	0.96668	1.111	0.069363
Zm00001d008640_P005	Importin subunit alpha	28.339			0.573			0.969			1.232	1.691		2.15		1.271
Zm00001d042993_P001	Protein ESKIMO 1	60.854
Zm00001d039000_P001	HSP40/DnaJ peptide-binding protein	38.651	1.182	0.884	1.046	1.005	0.827	0.597	0.847	0.971	0.633	0.781	0.20426	0.788	0.178497	1.009	0.93928
Zm00001d002980_P004	Protein RETICULATA chloroplastic	39.827	0.901	0.835	0.931	0.975	1.042	1	0.997	0.826	0.834	1.131	0.030036	0.996	0.9292	0.881	0.111725
Zm00001d040588_P001	Ribosomal protein L18e/L15 superfamily protein	30.476		0.5			1.062			0.955		2.124		1.91		0.899
Zm00001d041606_P013	minichromosome maintenance2 a cell cycle gene regulated by tb1 GN= mcm2	32.181	0.708	0.808	0.47	1.39	1.047	1.166	1.435	1.311	1.342	1.814	0.028336	2.058	0.0106992	1.135	0.20224
Zm00001d053028_P007	Protein TPLATE	127.37	0.617		0.638	1.133		1.281	1.089		1.063	1.924	0.0093788	1.715	0.00146072	0.891	0.21244
Zm00001d029839_P007	Protein NEN2	48.862	0.433			0.495			0.474			1.143		1.095		0.958
Zm00001d017848_P017	Clustered mitochondria protein	126.39	0.91		0.845	1.003		1	1.056		1.086	1.141	0.069842	1.221	0.037116	1.069	0.041478
Zm00001d035194_P001	leunig-related8 GN= lug8	57.215	0.867	1.038	0.761	1.01	0.865	1.118	1.027	0.907	1.051	1.123	0.36862	1.12	0.30346	0.997	0.99342
Zm00001d040850_P003	Shikimate biosynthesis protein aroDE	54.827			0.913			1.004			1.14	1.1		1.249		1.135
Zm00001d026394_P001	Probable galacturonosyltransferase 10	63.539	0.556		0.84	0.918		0.9	1.179		0.898	1.302	0.3014	1.488	0.23966	1.142	0.4595
Zm00001d037636_P007	Cellulose synthase-2%3B Cellulose synthase2	99.568	0.931			1.455			1.024			1.563		1.1		0.704
Zm00001d004740_P001	Transmembrane 9 superfamily protein member 3	64.803
Zm00001d042584_P006	diphosphocytidyl methyl erythritol synthase1 encodes 4-Diphosphocytidyl-2C-methyl-D-erythritol synthase GN= dmes1	23.459	0.763	0.928	0.878	0.775	0.819	0.744	0.999	0.775	0.822	0.91	0.22878	1.011	0.9393	1.11	0.28994
Zm00001d032422_P004	Dormancy-associated protein 1	12.844	1.792		1.267	1.018		0.957	0.689		0.93	0.646	0.1382	0.529	0.110058	0.82	0.3047
Zm00001d052336_P001	Peroxidase 67	37.59	0.317	0.29	0.346	1.707	2.119	1.33	2.587	2.206	1.46	5.41	0.00031641	6.561	0.00047848	1.213	0.44666
Zm00001d038359_P004	uncharacterized protein	14.55	0.932		0.966	1.028		0.977	1.13		1.017	1.056	0.22096	1.131	0.159558	1.071	0.3686
Zm00001d002246_P004	polyketide synthesis homolog1 vegetative meristem cDNA 7C02F01 similar to an acyl CoA condensing enzyme GN= pks1	30.27	1.344	0.557	0.886	1.003	0.844	0.909	1.186	1.214	1.04	0.989	0.85782	1.234	0.35364	1.248	0.032983
Zm00001d012118_P001	GPI transamidase component PIG-S-related	63.83			0.871			1.053			1.088	1.209		1.249		1.033
Zm00001d003148_P002	Enhancer of rudimentary homolog	11.415	0.67			1.235			1.325			1.843		1.978		1.073
Zm00001d006907_P003	Transcription elongation factor SPT4	14.618	1.133		1.185	1.008		1.008	0.886		0.85	0.87	0.024961	0.749	0.0109837	0.861	0.018644
Zm00001d013426_P002	Dynamin-related protein 1C	67.984	1.217			0.917			1.146			0.753		0.942		1.25
Zm00001d051678_P019	WD40%2C G-beta domain containing family protein%2C family	130.6	1.013	0.978	1.088	0.931	0.973	0.949	0.905	0.855	0.837	0.927	0.089899	0.843	0.0121991	0.91	0.023781
Zm00001d002595_P003	TatD related DNase	34.076	0.977	0.887	0.944	0.931	0.796	0.842	0.723	0.553	0.795	0.915	0.168961	0.738	0.048519	0.806	0.1293
Zm00001d047522_P003	Vacuolar-sorting receptor 1	70.313	0.772	0.785		0.991	0.938		1.306	1.33		1.239	0.0175591	1.693	0.00055506	1.367	0.0084644
Zm00001d049363_P002	Putative alcohol dehydrogenase superfamily protein	40.361	0.823	0.784	0.624	0.842	0.929	0.935	0.771	0.899	0.69	1.213	0.09614	1.058	0.64328	0.872	0.166625
Zm00001d035679_P004	Pumilio homolog 3	91.018
Zm00001d011958_P001	Glutathione S-transferase family protein	41.149	1.051	0.958	1.065	0.891	0.835	0.894	1.539	1.607	1.44	0.852	0.0164576	1.492	0.00097609	1.75	0.000137883
Zm00001d025644_P001	Agmatine deiminase	41.638	1.24	1.201	1.043	1.003	1.002	1.004	0.94	0.987	0.973	0.864	0.113785	0.832	0.030396	0.964	0.124664
Zm00001d010403_P002	E3 ubiquitin-protein ligase SINAT4	14.866		0.836	0.525		0.952	1.02		1.032	1.05	1.449	0.23338	1.53	0.30282	1.056	0.26302
Zm00001d044250_P001	Carbamoyl-phosphate synthase large chain chloroplastic	126.93	1.113	1.056	0.988	0.974	1.032	1.031	0.873	1.016	0.97	0.962	0.3904	0.906	0.152081	0.941	0.27246
Zm00001d026681_P001	from the Czech 'roh' meaning 'corner'	44.026	0.768	0.957	0.877	1.278	1.179	1.048	0.894	0.847	0.901	1.347	0.025596	1.015	0.79102	0.754	0.010022
Zm00001d032921_P002	uncharacterized protein	37.475	1.819	1.819	1.64	1.626	1.457	1.575	1.613	1.403	1.71	0.883	0.058243	0.895	0.173335	1.015	0.86522
Zm00001d047448_P002	Glutathione peroxidase	19.286	1.05	1.016	1.045	0.922	0.938	0.998	0.799	0.847	0.954	0.919	0.03104	0.836	0.026678	0.91	0.167361
Zm00001d039575_P001	1-aminocyclopropane-1-carboxylate oxidase	40.606	1.083	1.124	0.851	0.932	1.074	0.936	1.003	0.895	0.906	0.962	0.75188	0.917	0.44106	0.953	0.46842
Zm00001d021688_P001	Cysteine-rich receptor-like protein kinase 10	74.387		0.579	0.646		0.909	0.794		0.968	1.622	1.39	0.063485	2.114	0.112856	1.521	0.28254
Zm00001d042233_P002	Ribosomal protein S18	34.327			1.271			1.299			1.196	1.022		0.941		0.921
Zm00001d008846_P009	Glutaminyl-tRNA synthetase	87.337			1.001			0.857			0.752	0.856		0.751		0.877
Zm00001d035859_P001	plastocyanin homolog1 leaf cDNA csu257, similar to plastocyanin GN= ploc1	15.871	1.104	1.268	1.435	0.973	0.911	1.137	0.858	0.929	0.708	0.794	0.083579	0.655	0.0186846	0.826	0.136657
Zm00001d039272_P003	WPP domain-interacting tail-anchored protein 1	72.352		1.067			1.355			0.849		1.27		0.796		0.627
Zm00001d011220_P005	ATP-dependent zinc metalloprotease FTSH 4 mitochondrial	76.043	1.097	0.715		1.285	1.395		0.972	0.985		1.479	0.198365	1.08	0.72262	0.73	0.0171443
Zm00001d048155_P001	ADP-ribosylation factor-like A1C	20.711		1.184	1.254		1.003	1.04		0.918	0.816	0.838	0.035065	0.711	0.034783	0.849	0.115081
Zm00001d011483_P042	Transducin/WD40 repeat-like superfamily protein	132.76		1.093			1.243			1.235		1.137		1.13		0.994
Zm00001d033558_P001	Tetratricopeptide repeat (TPR)-like superfamily protein	56.536	1.243	1.213	1.321	1.185	1.183	1.108	1.044	0.849	0.898	0.92	0.069457	0.739	0.0101762	0.803	0.027316
Zm00001d042525_P009	60S ribosomal protein L5-1 homolog a endosperm cDNA 5C05D11 (uaz189), similar to ribosomal protein GN= rpl5a	25.812	0.973	0.882	0.879	1.753	1.556	1.772	0.943	1.012	1.022	1.858	0.00031731	1.089	0.110182	0.586	0.00039801
Zm00001d023830_P001	Fiber protein Fb19	18.099	1.124	1.128	1.188	1.018	1.032	0.923	0.871	0.985	0.888	0.864	0.020444	0.798	0.0057401	0.923	0.196277
Zm00001d012254_P001	Putative patellin family protein	56.934	0.877			2.088			1.45			2.381		1.653		0.694
Zm00001d039518_P001	eukaryotic initiation factor3 cDNA encodes a protein homologous to the large subunit (eIF3) of the eukaryotic initiation factor essential to protein initiation GN= eif3	111.67	0.911	1.016	0.966	1.049	1.15	1.068	1.045	0.964	1.019	1.129	0.044903	1.047	0.30876	0.927	0.109161
Zm00001d043407_P003	SGS domain-containing protein	24.644	0.844	0.932	0.922	0.797	0.742	1.057	0.811	0.777	0.961	0.962	0.68238	0.945	0.4513	0.982	0.93718
Zm00001d012677_P011	Glycerophosphodiester phosphodiesterase GDPD5	43.545	1.148	1.136	1.14	0.997	0.847	0.914	0.801	0.841	0.902	0.805	0.043637	0.743	0.0131971	0.922	0.24364
Zm00001d026706_P002	ABC transporter G family member 5	21.322	1.156			0.978			0.946			0.846		0.818		0.967
Zm00001d032570_P001	soluble epoxide hydrolase	35.79	1.585	0.764	1.368	1.201	1.323	1.063	0.999	0.964	0.946	0.965	0.97906	0.783	0.46642	0.811	0.03446
Zm00001d046135_P001	Protein DJ-1 homolog B	46.772	1.012	1.077	0.944	1.001	0.997	0.994	0.977	0.856	0.963	0.986	0.77986	0.922	0.22258	0.934	0.23932
Zm00001d002440_P004	Clathrin interactor EPSIN 1	63.322	0.651			1.169			0.935			1.796		1.436		0.8
Zm00001d034409_P001	hydroxyproline-rich glycoprotein family protein	49.142	1.148		0.733	1.006		1.128	1.145		0.994	1.135	0.5846	1.137	0.58666	1.002	0.9885
Zm00001d048843_P001	math-btb9 GN= mab9	39.36	1.041	1.048	1.172	1.258	0.866	1.071	1.177	1.133	1.017	0.98	0.80348	1.02	0.75294	1.041	0.6894
Zm00001d038700_P001	O-methyltransferase ZRP4	39.542
Zm00001d014679_P001	acidic ribosomal protein P3 novel acidic phosphoprotein GN= arpp3	12.134	0.681	0.718	0.623	1.274	1.381	1.208	1.226	1.255	1.173	1.91	0.00033907	1.807	0.00020352	0.946	0.28006
Zm00001d034066_P001	UDP-glycosyltransferase 83A1	50.689	1.595	1.417	1.61	1.415	1.014	1.253	1.26	1.284	1.455	0.797	0.090203	0.865	0.076143	1.086	0.4496
Zm00001d011785_P001	Transcription factor LUX	23.718			0.554			1.149			1.154	2.074		2.083		1.004
Zm00001d045564_P001	Haloacid dehalogenase-like hydrolase domain-containing protein Sgpp	27.39	1.232	0.961	1.209	0.804	1.185	0.819	0.962	0.575	0.895	0.825	0.2474	0.715	0.120099	0.866	0.4996
Zm00001d011471_P001	ADPATP carrier protein 1 chloroplastic	68.774	1.096		1.14	0.915		0.94	1.096		0.913	0.83	0.015937	0.898	0.35672	1.083	0.49856
Zm00001d020051_P001	Peroxisome biogenesis protein 3-1	34.732		1.265			1.055			1.007		0.834		0.796		0.955
Zm00001d007760_P001	Exocyst complex component EXO84B	85.055
Zm00001d053813_P016	Cullin-associated NEDD8-dissociated protein 1	131.82		0.946	0.824		1.171	1.2		1.128	1.16	1.34	0.052224	1.293	0.066661	0.965	0.194983
Zm00001d012998_P001	50S ribosomal protein L17 chloroplastic	22.775	0.622	0.692	0.53	1.018	1.008	0.96	0.897	0.876	0.969	1.619	0.0035987	1.487	0.0084979	0.918	0.072621
Zm00001d032231_P002	14-3-3-like protein GF14 nu	28.947	1.086	1.042	0.97	1.037	1.004	1.069	0.973	1.017	0.955	1.004	0.9082	0.951	0.25824	0.947	0.103923
Zm00001d034833_P004	Protein prenylyltransferase superfamily protein	34.323	0.864			0.785			0.88			0.909		1.019		1.121
Zm00001d013583_P002	Ras-related protein RABF2a	22.078
Zm00001d002945_P003	ras-related protein18A1 GN= ras18A1	21.252	0.998			0.961			0.985			0.963		0.987		1.025
Zm00001d011631_P001	Reticulon-like protein B9	24.464		0.775	0.658		0.939	1.311		1.049	1.016	1.57	0.141175	1.441	0.047555	0.918	0.70914
Zm00001d018386_P003	Aspartate aminotransferase chloroplastic	45.517	1.266	1.169	1.229	1.149	1.157	1.121	0.97	0.947	0.967	0.935	0.057582	0.787	0.00061744	0.842	0.000142617
Zm00001d007692_P002	Auxilin-related protein 1	95.172	1.119			0.975			1.097			0.871		0.98		1.125
Zm00001d053016_P002	Putative calcium-dependent protein kinase family protein	56.479	1.054	1.042		0.948	1.209		1	1.329		1.029	0.87704	1.111	0.5719	1.08	0.73062
Zm00001d034832_P003	Probable acyl-activating enzyme 16 chloroplastic	85.838	1.129			1.027			0.943			0.91		0.835		0.918
Zm00001d047863_P007	Vacuolar protein sorting-associated protein 9A	54.214	1.064			1.08			0.995			1.015		0.935		0.921
Zm00001d046381_P030	ARM repeat superfamily protein	15.722		1.126			1.077			1.025		0.956		0.91		0.952
Zm00001d047638_P001	Calcium-dependent phosphotriesterase superfamily protein	35.724	0.422	0.475	0.45	0.556	0.744	0.622	1.186	1.123	1.154	1.427	0.0187754	2.571	1.74746e-05	1.802	0.002303
Zm00001d016410_P001	RNA-binding (RRM/RBD/RNP motifs) family protein	11.148		0.896			1.447			1.137		1.615		1.269		0.786
Zm00001d047389_P002	zinc knuckle (CCHC-type) family protein	18.598		1.076			0.864			0.889		0.803		0.826		1.029
Zm00001d000001_P002	polyphenol oxidase1 vegetative meristem cDNA 7C02D02 GN=ppo1	67.066	1.478	1.431	1.516	1.183	1.154	1.173	0.936	0.942	0.862	0.793	0.00022055	0.619	0.00013581	0.781	0.00108382
Zm00001d046838_P005	Putative receptor-like protein kinase family protein	92.63			1.193			1.193			0.846	1		0.709		0.709
Zm00001d052445_P012	ARM repeat superfamily protein	109.47			0.627			1.212			1.042	1.933		1.662		0.86
Zm00001d035846_P001	Histidine kinase CKI1	112.11		0.937			1.036			1.072		1.106		1.144		1.035
Zm00001d053672_P004	Putative glycosyl hydrolase of unknown function (DUF1680)	88.051	1.059	1.145	1.177	0.948	0.889	1.038	0.966	0.864	0.896	0.85	0.041217	0.806	0.0091559	0.948	0.40094
Zm00001d014358_P016	Heat shock 70 kDa protein 16	66.308			0.555			1.132			1.276	2.04		2.299		1.127
Zm00001d050168_P001	uncharacterized protein	15.541	0.593	0.528	0.613	1.194	1.064	1.008	0.984	1.078	0.974	1.884	0.00071871	1.751	0.00054068	0.93	0.29504
Zm00001d045596_P001	IQ calmodulin-binding motif family protein	46.116	1.072	1.205	1.205	1.005	1.061	1.017	1.029	1.002	0.952	0.885	0.046537	0.857	0.02722	0.968	0.30316
Zm00001d008281_P001	EMB1374 isoform 1%3B EMB1374 isoform 2	39.563	0.75	0.897	0.899	0.921	1.042	0.872	1.127	1.101	1.14	1.114	0.2468	1.323	0.0096594	1.188	0.031062
Zm00001d003457_P001	PLAT domain-containing protein 3	21.612	1.366	1.326	1.354	1.124	1.085	1.199	1.045	0.94	0.911	0.842	0.0048581	0.716	0.00137838	0.85	0.032197
Zm00001d053782_P005	cytochrome P450 15 encodes CYP97B GN= cyp15	52.169	1.187			0.973			0.989			0.82		0.833		1.016
Zm00001d013159_P004	alpha tubulin3 alpha tubulin family GN= tua3	49.56	0.838	0.723	0.923	1.44	1.375	1.629	1.001	0.95	0.803	1.789	0.0025818	1.109	0.34592	0.62	0.0045403
Zm00001d005775_P005	Cellulose synthase A catalytic subunit 7 [UDP-forming]	118.35
Zm00001d031081_P004	NagB/RpiA/CoA transferase-like superfamily protein	60.485	0.619		0.695	0.971		1.152	0.993		1.078	1.616	0.043655	1.576	0.023404	0.976	0.83814
Zm00001d025626_P002	Betaine aldehyde dehydrogenase 2 mitochondrial	54.861	1.341	1.298		1.044	1.062		1.126	1.13		0.798	0.0065961	0.855	0.0107646	1.071	0.0157012
Zm00001d034776_P006	Elongation factor 2	93.922	0.524	0.523		1.279	1.267		1.085	1.194		2.432	2.4645e-05	2.177	0.039196	0.895	0.145438
Zm00001d024936_P001	Fatty acid amide hydrolase	39.73	1.182	1.39	1.059	1.083	1.073	1.05	1.061	1.118	1.024	0.883	0.27528	0.882	0.22248	0.999	0.9584
Zm00001d049088_P001	ATP-dependent (S)-NAD(P)H-hydrate dehydratase	43.012	1.418	1.415	1.325	1.077	0.967	1.031	0.879	0.999	0.926	0.74	0.00140454	0.674	0.00080158	0.912	0.129064
Zm00001d049487_P001	Cullin-3B	85.735			0.714			1.016			1.014	1.423		1.42		0.998
Zm00001d050339_P001	Betaine aldehyde dehydrogenase 2 mitochondrial	54.912	1.117	1.051	1.264	1.175	0.855	0.629	0.951	0.961	0.854	0.775	0.20544	0.806	0.031682	1.04	0.72194
Zm00001d025107_P001	uncharacterized protein	39.898	1.21	1.226		0.977	1.006		0.907	0.894		0.814	0.0060162	0.739	0.00104128	0.908	0.027564
Zm00001d037620_P002	60S ribosomal protein L13	23.837	0.856		1.825	0.9		0.969	0.852		0.867	0.697	0.52356	0.641	0.5035	0.92	0.160221
Zm00001d004930_P002	Peptidyl-prolyl cis-trans isomerase FKBP42	33.01		0.673			0.984			1.017		1.462		1.511		1.034
Zm00001d009774_P001	Nucleoside diphosphate kinase	25.972	1.451	1.303	1.434	1.207	1.216	1.022	1.117	1.161	1.129	0.823	0.040681	0.814	0.0046446	0.989	0.8959
Zm00001d033422_P001	GTP binding protein2 cDNA sequence similar animal G protein beta-subunits GN= gbp2	41.714	1.01	1.076	0.843	1.064	1.02	1.01	1.159	1.082	1.19	1.056	0.46908	1.171	0.106763	1.109	0.034195
Zm00001d007904_P026	Ubiquitin carboxyl-terminal hydrolase 13	131.01	0.766			1.113			1.071			1.453		1.398		0.962
Zm00001d040294_P001	Sm-like protein LSM4	15.628		1.003	0.969		1.186	1.085		1.171	1.087	1.152	0.098821	1.145	0.081345	0.994	0.9338
Zm00001d002428_P001	EF hand family protein	19.407	0.635	0.581	0.612	0.633	0.692	0.723	0.726	0.687	0.604	1.12	0.073737	1.103	0.186136	0.985	0.816
Zm00001d008531_P007	uncharacterized protein	48.674
Zm00001d011565_P003	Putative ubiquitin-conjugating enzyme family%3B Ubiquitin-conjugating enzyme E2 N	17.188		0.479	0.562		1.105	0.928		1.271	1.084	1.953	0.029918	2.262	0.018545	1.158	0.33766
Zm00001d008925_P001	GDSL esterase/lipase	40.604			0.14			0.86			3.086	6.143		22.043		3.588
Zm00001d002945_P013	ras-related protein18A1 GN= ras18A1	23.74		1.074	0.962		0.944	1.097		0.952	0.921	1.002	0.99126	0.92	0.28966	0.918	0.39234
Zm00001d025232_P006	Alpha-13-mannosyl-glycoprotein 2-beta-N-acetylglucosaminyltransferase	51.418	1.037	0.963	0.986	0.932	0.918	0.951	0.881	0.937	1.029	0.938	0.05776	0.953	0.38176	1.016	0.77208
Zm00001d054017_P005	Signal peptide peptidase	20.825		0.514			0.802			1.326		1.56		2.58		1.653
Zm00001d002654_P026	naked endosperm1 double mutants have multiple (2-5) layers of peripheral endosperm cells that lack starch granules or other features of starchy endosperm GN= nkd1	21.528	0.9	0.987	0.533	1.086	0.976	1.163	1.069	1.075	1.303	1.333	0.183402	1.424	0.131081	1.069	0.47676
Zm00001d006681_P003	uncharacterized protein	61.877		1.176	1.184		0.929	0.916		0.883	0.906	0.782	0.00100357	0.758	0.0022974	0.97	0.169781
Zm00001d010197_P001	Amidophosphoribosyltransferase	58.093	0.803	0.882	0.861	0.978	0.983	0.935	1.016	1.012	1.052	1.137	0.0161032	1.21	0.0034007	1.064	0.037402
Zm00001d006041_P038	Proton pump-interactor 1	111.87	0.527		0.53	1.024		1.121	1.499		1.471	2.029	0.0040957	2.81	9.5409e-05	1.385	0.0194758
Zm00001d048073_P002	Heat shock 70 kDa protein 8	62.467	0.894	0.995	0.99	1.017	1.013	0.998	0.896	0.839	0.844	1.052	0.21784	0.896	0.054938	0.852	0.00178195
Zm00001d008993_P004	DUF4378 domain protein	34.262		0.916	0.972		1.035	1.015		1.033	0.967	1.086	0.117896	1.059	0.32438	0.976	0.54044
Zm00001d036090_P002	Armadillo repeat-containing kinesin-like protein 3	98.225			1.401			1.064			0.646	0.759		0.461		0.607
Zm00001d026483_P001	NADPH--cytochrome P450 reductase	76.41	0.918	0.698	0.882	1.134	1.034	0.972	1.203	1.106	1.005	1.257	0.072476	1.327	0.045435	1.055	0.48084
Zm00001d026642_P001	DNA binding activity3 cDNA pAS13 has binding activity GN= dba3	15.77	1.329	1.223	1.278	1.055	1.094	1.119	1.058	1.123	1.212	0.853	0.0058168	0.886	0.056955	1.038	0.4454
Zm00001d035515_P001	Protein alx	41.88	0.759		0.708	1.209		1.238	1.158		1.112	1.668	0.0051035	1.547	0.0083799	0.928	0.085163
Zm00001d050567_P001	Acetolactate synthase 2%2C chloroplastic	68.992	1.037	0.921	0.963	1.064	1.089	1.045	1.04	1.065	1.094	1.095	0.066439	1.095	0.07068	1	0.99042
Zm00001d013995_P001	Peptide-N4-(N-acetyl-beta-glucosaminyl)asparagine amidase A protein	69.748	1.155	0.59	0.558	0.812	1.084	1.047	0.776	0.787	1.004	1.278	0.30472	1.115	0.5561	0.872	0.33364
Zm00001d039263_P001	OB-fold nucleic acid binding domain containing protein	15.497	0.576	0.528	0.555	1.042	1.01	1.157	1.274	1.223	1.272	1.934	0.000163099	2.272	4.3393e-06	1.175	0.0198169
Zm00001d050130_P005	IMP dehydrogenase	14.738			0.983			1.036			0.936	1.054		0.952		0.903
Zm00001d045692_P032	autophagy 2	92.341			0.957			0.851			1.319	0.889		1.378		1.55
Zm00001d021958_P001	NADH-ubiquinone oxidoreductase 18 kDa subunit	17.252			1.011			1.134			0.968	1.122		0.957		0.854
Zm00001d034931_P032	COP1-interacting protein-related	115.39	1.335	0.995		1.233	1.307		0.89	0.837		1.09	0.58508	0.741	0.193941	0.68	0.0118214
Zm00001d015450_P002	SUN domain protein1 canonical C-terminal SUN-domain (CCSD) type nuclear envelope protein GN= sun1	50.96	1.09		0.881	1.065		1.142	1.044		0.828	1.12	0.40218	0.95	0.77006	0.848	0.29384
Zm00001d028751_P001	Protein ESKIMO 1	61.663	1.111	1.089	1.1	1.039	1.052	1.153	1.019	0.995	1.066	0.983	0.61462	0.933	0.029922	0.949	0.25486
Zm00001d037214_P010	Putative ARM repeat-containing protein containing family protein	199.66	1.38	1.544		0.687	1.171		1.262	0.68		0.635	0.2158	0.664	0.28482	1.045	0.94414
Zm00001d032282_P012	Aminopeptidase M1	98.402	1.212	1.185	1.153	1.119	1.104	1.073	0.941	0.995	1.087	0.928	0.0174993	0.852	0.021682	0.917	0.114524
Zm00001d025222_P001	splicing factor-related	76.182	0.994	1.041	0.871	1.01	0.976	1.074	1.022	0.986	0.888	1.053	0.42386	0.997	0.97366	0.946	0.33012
Zm00001d018657_P057	PHD finger family protein	77.596	0.692			1.2			1.088			1.734		1.572		0.907
Zm00001d020896_P001	uncharacterized protein	17.914			0.853			1.085			0.757	1.272		0.887		0.698
Zm00001d047006_P004	protein GN=Expressed protein	59.299			0.921			1.079			0.9	1.172		0.977		0.834
Zm00001d030744_P001	uncharacterized protein	55.737	0.887	0.869	1.037	1.108	1.09	1.128	1.019	1.484	1.265	1.191	0.035001	1.349	0.076277	1.133	0.4096
Zm00001d034531_P003	Dihydrolipoyllysine-residue acetyltransferase component 1 of pyruvate dehydrogenase complex mitochondrial	43.677	0.922	0.852	0.998	1.03	1.013	1.056	0.954	0.914	0.968	1.118	0.074196	1.023	0.64052	0.915	0.0134575
Zm00001d028490_P008	ERAD-associated E3 ubiquitin-protein ligase component HRD3A	61.638	0.921	1.074	1.045	1.032	1.067	1.126	1.051	1.02	1.092	1.061	0.32206	1.04	0.46394	0.981	0.58354
Zm00001d053296_P001	Ubiquitin-conjugating enzyme E2 variant 1C	16.771	1.037	1.03	1.087	0.911	1.078	1.004	1.089	1.043	1.044	0.949	0.35098	1.007	0.76636	1.061	0.29274
Zm00001d047908_P003	Long chain base biosynthesis protein 1	52.457	0.949	0.889	0.965	0.999	0.924	1.069	1.013	1.023	1.04	1.067	0.26082	1.097	0.023338	1.028	0.52998
Zm00001d043851_P001	Long chain acyl-CoA synthetase 5	73.414	0.818	0.821	0.681	0.799	0.775	0.88	1.135	1.148	1.099	1.058	0.46646	1.458	0.0038152	1.378	0.00134485
Zm00001d040880_P001	ATP synthase subunit 1	55.18	1.273	1.282	1.237	1.031	1.033	1.065	1.019	0.96	1	0.825	0.0002215	0.786	0.00030488	0.952	0.07388
Zm00001d029483_P001	Probable small nuclear ribonucleoprotein G	8.9223			0.879			1.257			0.775	1.43		0.882		0.617
Zm00001d022152_P001	alanine aminotransferase9 putative leaf alanine transminase GN= alt9	58.738	1.162	1.123	1.124	0.964	1.019	1.013	1.012	1.04	1.043	0.879	0.0034558	0.908	0.0028381	1.033	0.177959
Zm00001d029688_P006	cytochrome P450 family 704 subfamily A polypeptide 2	17.109		0.782	0.527		0.877	0.901		1.215	1.303	1.358	0.24158	1.924	0.078399	1.416	0.0114378
Zm00001d037675_P001	Actin-like ATPase superfamily protein	41.135	1.141		1.055	0.943		0.902	0.752		0.85	0.84	0.061196	0.73	0.048939	0.868	0.159659
Zm00001d024734_P001	Peroxidase 2	38.037	0.881	0.791	0.695	1.097	1.158	1.082	0.778	0.741	0.82	1.41	0.0083045	0.988	0.9189	0.701	0.00057927
Zm00001d025397_P002	ubiquitin interaction motif-containing protein	67.639	0.914	0.755	0.96	0.999	1.026	1.107	0.527	0.563	0.635	1.191	0.086943	0.656	0.0101226	0.551	0.00067512
Zm00001d003067_P002	Protein root UVB sensitive 2 chloroplastic	30.585	1.089			1.057			0.907			0.971		0.833		0.858
Zm00001d038923_P001	Guanine nucleotide-binding protein beta subunit-like protein	36.236	1.161	1.133	1.24	1.877	1.346	1.485	0.88	0.715	0.498	1.332	0.053238	0.592	0.030982	0.445	0.0128573
Zm00001d050020_P002	Putative fucosyltransferase-like protein	36.924			1.049			0.876			1.016	0.835		0.969		1.16
Zm00001d006052_P003	myosin heavy chain-related	50.626	0.931			1.152			0.95			1.237		1.02		0.825
Zm00001d038506_P004	KH domain-containing protein	18.312
Zm00001d038178_P001	Probable carboxylesterase 17	38.746	1.545	1.457	1.228	1.075	1.088	1.138	0.945	0.997	1.02	0.78	0.026541	0.7	0.008298	0.897	0.0189638
Zm00001d036971_P021	ATP/GTP-binding protein family	138.59	0.729			1.127			0.901			1.546		1.236		0.799
Zm00001d018471_P001	Nucleic acid-binding OB-fold-like protein	21.145			0.833			1.056			1.026	1.268		1.232		0.972
Zm00001d029047_P001	Receptor-like protein kinase FERONIA	95.735	0.792	0.709	0.885	0.999	1.353	1.222	1.138	0.978		1.498	0.021799	1.33	0.064384	0.888	0.44016
Zm00001d026584_P005	Adenylate kinase 1 chloroplastic	12.057
Zm00001d053249_P001	Germin-like protein subfamily 1 member 8	23.25	1.02		0.993	0.687		0.859	1.059		1.052	0.768	0.138416	1.049	0.07486	1.365	0.21534
Zm00001d017523_P002	uncharacterized protein	23.697	0.959	0.95		1.047	0.967		0.905	0.863		1.055	0.3181	0.926	0.086339	0.878	0.107235
Zm00001d050216_P007	Afadin/alpha-actinin-binding protein	33.344			1.129			0.913			0.948	0.809		0.84		1.038
Zm00001d022102_P001	protein GN=Expressed protein	33.331		0.75			1.066			1.051		1.421		1.401		0.986
Zm00001d015356_P001	4-hydroxyphenylpyruvate dioxygenase 1 GN= hppd1	46.901	0.686	0.814	0.964	0.877	0.725	0.764	1.168	1.089	1.064	0.96	0.7779	1.348	0.039597	1.404	0.0057158
Zm00001d003252_P006	glucose-6-phosphate dehydrogenase1 leaf cDNA csu350, 5' sequence similar to plant glucose-6-phosphate dehydrogenase GN= gpdh1	57.628	0.939	0.875	0.914	0.806	0.735	0.817	1.008	0.942	0.974	0.864	0.0199991	1.072	0.070698	1.24	0.0049979
Zm00001d032725_P009	Beta-glucosidase GBA2 type family protein	72.822		0.333	0.238		0.341	0.488		0.446	0.692	1.452	0.2701	1.993	0.133178	1.373	0.3897
Zm00001d020419_P005	Ubiquitin receptor RAD23c	41.475	0.931		1.155	1.153		1.044	1.084		1.049	1.053	0.68142	1.023	0.82168	0.971	0.6408
Zm00001d043145_P001	Cupin%2C RmlC-type	24.666			0.994			1.012			0.901	1.018		0.906		0.89
Zm00001d042908_P003	Ribonuclease II chloroplastic/mitochondrial	73.697	1.031	0.967	1.218	1.032	1.134	1.025	1.081	1.021	1.07	0.992	0.95982	0.986	0.90226	0.994	0.89506
Zm00001d012750_P001	MACPF domain-containing protein CAD1	58.422			0.678			1.156			1.195	1.705		1.763		1.034
Zm00001d029725_P001	Â cDNA partially sequenced, weak homology to yeast heat shock protein 26, SwissProt P15992 and to leghemoglobin, GenBank accession M91075 GN= csu3	27	0.95	0.804	0.944	1.004	0.936	0.932	1.13	1.038	0.915	1.064	0.33844	1.143	0.181603	1.073	0.36192
Zm00001d002422_P001	Pectin acetylesterase 7	22.909	1.082		1.122	1.176		1.058	0.868		0.787	1.014	0.8464	0.751	0.03146	0.741	0.053221
Zm00001d035130_P002	COP9 signalosome complex subunit 3	27.127		1.002			1			0.82		0.998		0.818		0.82
Zm00001d004019_P001	stearoyl-acyl-carrier-protein desaturase5 GN= sacd5	44.722		0.813	0.702		1.301	1.244		0.741	0.794	1.68	0.021001	1.013	0.86856	0.603	0.0065581
Zm00001d044156_P002	cytochrome P450 family 72 subfamily A polypeptide 8	58.405	0.767			0.744			1.322			0.97		1.724		1.777
Zm00001d043726_P002	AP-1 complex subunit mu-2	47.755	1.072	1.093	1.158	0.898	0.926	0.993	1.066	1.007	0.994	0.848	0.0117841	0.923	0.064335	1.089	0.080358
Zm00001d012537_P005	ADP-ribosylation factor A1F	20.627	1.079			1.003			0.965			0.93		0.894		0.962
Zm00001d049982_P006	Alpha-soluble NSF attachment protein 2	32.397	1.107	1.107	1.074	0.969	0.933	0.924	0.913	0.871	0.958	0.859	0.00101787	0.834	0.0033957	0.97	0.3789
Zm00001d035789_P002	Histidine--tRNA ligase cytoplasmic	95.092	0.972	1.09	1.088	1.027	1.037	0.918	0.997	0.995	0.97	0.947	0.37042	0.94	0.196715	0.993	0.90128
Zm00001d002261_P003	Peroxisomal (S)-2-hydroxy-acid oxidase GLO1	43.919	0.734		0.708	0.954		0.872	1.285		1.316	1.266	0.039844	1.804	0.00133987	1.424	0.0167443
Zm00001d014786_P003	Has 35333 Blast hits to 34131 proteins in 2444 species Archae - 798 GN=CONTAINS InterPro DOMAIN/s: Brain/reproductive organ-expressed protein (InterPro:IPR010358)	39.381	1.147		1.217	0.904		0.864	0.879		0.885	0.748	0.0160834	0.746	0.0102407	0.998	0.93786
Zm00001d016144_P006	Chalcone isomerase 3	21.619	0.62	0.698	0.569	0.777	0.59	0.876	0.744	0.773	0.888	1.189	0.28168	1.275	0.038403	1.072	0.56748
Zm00001d033388_P003	Tetratricopeptide repeat (TPR)-like superfamily protein	71.025	0.907		0.833	1.14		1.139	0.987		0.971	1.31	0.099245	1.125	0.111099	0.859	0.002896
Zm00001d039901_P004	Has 35333 Blast hits to 34131 proteins in 2444 species Archae - 798 GN=BEST Arabidopsis thaliana protein match is: proline-rich family protein (TAIR:AT3G09000.1)	27.378	0.777	0.89	1.025	1.112	1.262	1.051	1.074	1.012	0.88	1.272	0.064676	1.102	0.37186	0.866	0.145755
Zm00001d015893_P004	Probable pre-mRNA-splicing factor ATP-dependent RNA helicase DEAH5	123.33	1.158			1.171			0.911			1.011		0.787		0.778
Zm00001d033850_P024	alpha tubulin1 mRNA expressed primarily in root tips and pollen GN= tua1	20.481
Zm00001d014122_P004	Translin family protein	10.985		0.929	0.952		1.112	1.153		1.217	1.242	1.204	0.0135609	1.307	0.0035016	1.086	0.058161
Zm00001d013737_P001	Serpin-Z1	44.386	1.116	1.052	1.196	0.948	0.862	0.955	0.916	0.858	0.925	0.822	0.0168837	0.802	0.0075244	0.976	0.5914
Zm00001d007823_P001	ABC transporter F family member 4	77.671	0.59	0.502	0.508	0.521	0.439	0.562	0.592	0.704	0.531	0.951	0.58972	1.142	0.25628	1.2	0.174775
Zm00001d011139_P003	histone deacetylase102 GN= hdt102	28.898
Zm00001d010744_P004	Gamma-glutamyl hydrolase 1	36.131	1.467	1.605	1.331	1.152	1.283	1.249	1.307	1.352	1.35	0.837	0.048804	0.911	0.17458	1.088	0.066843
Zm00001d049099_P009	protein disulfide isomerase1 single copy cDNA, SSR umc1550 GN= pdi1	51.163		0.841			0.799			1.096		0.95		1.303		1.372
Zm00001d038380_P004	Ras-related protein RABE1c	23.882	0.655	0.404	0.673	1.264	1.224	1.325	1.286	1.468	1.494	2.202	0.039736	2.453	0.0059205	1.114	0.113357
Zm00001d009580_P001	Urease accessory protein G	29.934	0.699		0.795	0.924		0.992	1.076		1.062	1.282	0.076498	1.431	0.03072	1.116	0.092601
Zm00001d028515_P001	Eukaryotic translation initiation factor NCBP	26.541	1.353			1.011			0.996			0.747		0.736		0.985
Zm00001d013507_P001	Heat shock 70 kDa protein 6 chloroplastic	73.23	0.183			0.89			1.041			4.863		5.689		1.17
Zm00001d019568_P001	phosphoglucosamine mutase family protein	38.755	0.799	0.936	0.741	0.901	0.787	0.869	0.861	0.836	0.861	1.033	0.68068	1.033	0.64552	1	0.96552
Zm00001d044813_P001	Probable fructokinase-6 chloroplastic	41.228	1.315	1.265	1.458	1.096	1.162	1.146	0.897	1.042	1.026	0.843	0.021045	0.734	0.0083164	0.871	0.050915
Zm00001d049416_P001	Polyadenylate-binding protein RBP45C	49.341	0.955		0.576	0.911		0.985	0.769		1.117	1.238	0.43974	1.232	0.55176	0.995	0.91926
Zm00001d009719_P001	Probable protein phosphatase 2C 76	27.717	0.864			1.161			1.092			1.344		1.264		0.941
Zm00001d004857_P002	Transcription factor VIP1	35.624	0.879	0.895	1.209	1.275	1.157	1.12	0.974	1.097	1.104	1.191	0.170984	1.064	0.55358	0.894	0.117063
Zm00001d044747_P001	B12D protein	7.898	0.621	0.678		0.987	1.237		1.147	0.927		1.712	0.048077	1.597	0.056624	0.933	0.69956
Zm00001d022124_P001	60S ribosomal protein L27a-3	16.052	1.183	1.063	1.159	0.903	1.04	0.978	0.846	1.006	0.901	0.858	0.042505	0.809	0.023801	0.942	0.40762
Zm00001d003245_P001	Inactive LRR receptor-like serine/threonine-protein kinase BIR2	67.241		1.163			0.905			1.057		0.778		0.909		1.168
Zm00001d051447_P003	F-box protein PP2-A13	33.177			0.832			0.538			1.227	0.647		1.475		2.281
Zm00001d032250_P001	uncharacterized protein	23.968	0.315	0.335	0.289	1.121	1.222	1.057	1.094	0.933	0.966	3.621	2.405e-05	3.187	5.8353e-05	0.88	0.116383
Zm00001d011370_P001	Hydrolase%2C hydrolyzing O-glycosyl compound	48.27	1.211			0.907			0.951			0.749		0.785		1.049
Zm00001d025820_P001	Transducin/WD40 repeat-like superfamily protein	38.546			0.921			0.828			1.071	0.899		1.163		1.293
Zm00001d010016_P002	60S ribosomal protein L11-1	20.735	1.167	1.22	1.147	0.929	1.033	0.968	0.872	0.932	0.878	0.829	0.0063778	0.759	0.00059735	0.915	0.07856
Zm00001d036495_P003	Putative SERRATE-related C2H2 zinc-finger family protein	59.371	0.822		0.46	1.465		1.693	0.897		1.037	2.463	0.088019	1.509	0.27138	0.612	0.04096
Zm00001d038855_P003	flap endonuclease1 required for DNA repair GN= fen1	37.955		1.144	1.031		1.178	1.414		1.168	0.788	1.192	0.24218	0.899	0.60432	0.755	0.30492
Zm00001d044947_P001	triacylglycerol lipase-like 1	53.993	0.627	0.612	0.438	0.751	0.863	0.7	1.269	1.431	1.544	1.38	0.064996	2.531	0.00190162	1.834	0.00193865
Zm00001d034382_P001	uncharacterized protein	58.136	0.288	0.81	0.416	0.349	0.697	0.621	0.39	0.781	0.624	1.101	0.71096	1.186	0.5728	1.077	0.80868
Zm00001d029777_P001	Protein EXORDIUM-like 5	35.255	1.709	1.534	1.848	1.791	1.369	1.514	0.728	0.99	0.987	0.918	0.4038	0.531	0.0051808	0.579	0.0128219
Zm00001d031431_P001	complex I subunit	13.027	1.453	1.199	1.541	1.21	1.108	1.144	1.034	1.079	1.094	0.826	0.080081	0.765	0.027696	0.926	0.068999
Zm00001d023225_P001	Protein trichome birefringence-like 34	50.304	1.095			1.275			1.023			1.164		0.934		0.802
Zm00001d007942_P001	Phosphatidylinositol 345-trisphosphate 3-phosphatase and protein-tyrosine-phosphatase PTEN2A	70.41		0.877	0.832		1.294	1.288		1.252	1.082	1.511	0.0040767	1.366	0.057503	0.904	0.39068
Zm00001d005732_P005	Ubiquitin receptor RAD23c	41.242	1.247	1.008	0.972	1.053	0.907	0.955	0.919	1.006	1.121	0.903	0.33594	0.944	0.60054	1.045	0.58708
Zm00001d021615_P004	Cathepsin B-like cysteine proteinase 3	38.113	1.085	1.069	1.092	0.958	0.929	0.961	1.149	1.21	1.076	0.877	0.0004758	1.058	0.183483	1.206	0.0063833
Zm00001d031707_P001	La-related protein 6B	46.97	0.848	0.907	0.849	0.959	1.024	0.913	1.112	1.098	1.045	1.112	0.0574	1.25	0.00157716	1.124	0.037156
Zm00001d024763_P001	HXXXD-type acyl-transferase family protein	47.148	1.324	1.187	1.356	1.162	1.031	1.121	0.993	0.966	1.013	0.857	0.046816	0.769	0.0037564	0.897	0.047001
Zm00001d016452_P032	uncharacterized protein	44.142		0.804			0.842			1.068		1.047		1.328		1.268
Zm00001d014187_P013	Carbon catabolite repressor protein 4 homolog 1	57.624		0.716			0.675			0.794		0.943		1.109		1.176
Zm00001d039202_P001	Histone deacetylase 19	18.908	0.252	0.504		1.391	1.673		0.89	1.007		4.053	0.055798	2.509	0.109017	0.619	0.05014
Zm00001d044686_P001	Non-specific lipid-transfer protein	11.513	1.282	0.943	1.045	0.817	0.842	1.093	0.865	0.797	1.008	0.842	0.25158	0.817	0.154076	0.97	0.83086
Zm00001d021292_P001	Imidazole glycerol phosphate synthase hisHF chloroplastic	81.992
Zm00001d013891_P040	Tubulin-folding cofactor D	126.75	1.114	1.201		1.092	1.299		1.164	1.353		1.033	0.7864	1.087	0.43458	1.053	0.69356
Zm00001d037847_P001	Ras-related protein RABA6a	6.3261	1.121	1.339	1.216	0.949	1.04	1.074	0.832	0.887	0.939	0.833	0.045924	0.723	0.0065351	0.868	0.049758
Zm00001d035064_P001	HXXXD-type acyl-transferase family protein	51.417		0.766	0.964		0.79	0.75		0.969	1.081	0.89	0.44888	1.185	0.30336	1.331	0.042318
Zm00001d050917_P002	Glycerophosphodiester phosphodiesterase GDPDL3	81.683	1.116	1.171	1.112	1.133	1.045	1.075	0.922	0.923	0.983	0.957	0.2018	0.832	0.002401	0.869	0.0116619
Zm00001d015138_P004	uncharacterized protein	460.87	0.688	0.75	0.688	1.093	1.079	1.229	1.689	1.683	1.687	1.6	0.00074175	2.38	0.0010991	1.488	0.0106172
Zm00001d002704_P002	Glutathione peroxidase	18.46	1.295	1.091	1.303	1.101	0.965	1.082	1.022	1.063	1.115	0.853	0.092799	0.867	0.092605	1.017	0.73696
Zm00001d041836_P001	Amino acid permease 6	36.552		0.182			0.246			0.666		1.352		3.659		2.707
Zm00001d011104_P001	Photosynthetic NDH subunit of lumenal location 5 chloroplastic	26.217	1.17	1.075	1.04	0.866	1.005	1.149	0.9	0.926	0.703	0.919	0.37084	0.77	0.046838	0.837	0.21068
Zm00001d038106_P011	E3 ubiquitin-protein ligase KEG	69.834		0.759			1.018			1.356		1.341		1.787		1.332
Zm00001d031310_P001	Nuclear transcription factor Y subunit C-2	21.549	0.558	0.523	0.72	1.067	1.165	1.116	1.241	1.143	1.243	1.859	0.00336	2.014	0.0022013	1.083	0.100405
Zm00001d044628_P003	alpha/beta-Hydrolases superfamily protein	38.537
Zm00001d025025_P001	Electron transfer flavoprotein subunit beta mitochondrial	27.565	1.008	1.048	1.142	1.236	1.1	1.04	0.902	0.959	0.856	1.056	0.44688	0.85	0.030059	0.805	0.023538
Zm00001d009640_P002	Malate dehydrogenase 2 mitochondrial	38.581	1.122	1.215	1.132	0.913	0.996	0.988	0.871	0.929	0.939	0.835	0.0085826	0.79	0.0023634	0.945	0.199179
Zm00001d053545_P003	NAD(P)-binding Rossmann-fold superfamily protein	63.852			1.105			1.109			0.954	1.004		0.863		0.86
Zm00001d039111_P008	Peroxisomal membrane protein PEX14	13.149	0.616	1.016		0.835	1.03		0.914	0.625		1.143	0.6173	0.943	0.8978	0.825	0.44548
Zm00001d013442_P039	Phosphatidylinositol 4-kinase alpha 1	163.73		0.881			0.871			1.185		0.989		1.345		1.361
Zm00001d022544_P001	Rhodanese-like/PpiC domain-containing protein 12 chloroplastic	18.777	1.006	1.27		1.269	1.339		1.184	1.489		1.146	0.3554	1.174	0.42842	1.025	0.88998
Zm00001d016822_P006	Phosphoinositide phosphatase SAC6	54.505	1.31	1.451	1.5	1.23	1.089	1.453	1.257	1.308	1.33	0.885	0.2429	0.914	0.11514	1.033	0.67232
Zm00001d034023_P002	Inosine-5'-monophosphate dehydrogenase 1	52.57	1.127	1.016	1.107	0.875	0.849	0.937	1.117	1.032	1.008	0.819	0.0099234	0.971	0.55104	1.186	0.0160192
Zm00001d013290_P002	Transmembrane emp24 domain-containing protein p24beta3	13.376	0.461	0.745	0.525	1.005	0.973	1.1	1.174	1.009	1.128	1.778	0.0158175	1.913	0.011321	1.076	0.28286
Zm00001d023768_P001	Delta(12)-fatty-acid desaturase	43.491	0.396	0.487	0.361	0.854	0.87	0.897	1.947	1.82	1.681	2.107	0.00109988	4.379	0.00011592	2.079	8.15e-05
Zm00001d044195_P015	Polypyrimidine tract-binding protein homolog 2	46.32	0.738	1.006	0.78	1.126	1.012	0.991	1.13	0.956	1.048	1.24	0.097337	1.242	0.104879	1.002	0.98982
Zm00001d003311_P001	Probable 2-oxoglutarate-dependent dioxygenase AOP1	32.327	0.995	0.887	1.173	1.081	0.886	1.332	1.063	1.032	1.104	1.08	0.65168	1.047	0.5647	0.97	0.89154
Zm00001d008905_P001	Peptide-N4-(N-acetyl-beta-glucosaminyl)asparagine amidase A protein	62.205	0.921	0.907	0.966	1.051	1.031	1.022	0.859	0.821	0.897	1.111	0.0069967	0.922	0.063381	0.83	0.0022568
Zm00001d017769_P001	Ornithine carbamoyltransferase chloroplastic	40.091	1.069			1.033			0.916			0.966		0.857		0.887
Zm00001d047192_P001	5-pentadecatrienyl resorcinol O-methyltransferase	39.785
Zm00001d035304_P001	LIM domain-containing protein WLIM1	22.008	0.964		1.086	0.926		0.899	0.962		0.998	0.89	0.20294	0.956	0.5593	1.074	0.094216
Zm00001d048551_P003	Cell number regulator 6	26.68		1.13	1.184		1.235	1.342		0.895	0.712	1.114	0.153715	0.694	0.08642	0.624	0.059138
Zm00001d038330_P001	DUF1682 family protein	53.243	0.724	1.027		1.053	1.073		0.962	0.953		1.214	0.35454	1.094	0.6565	0.901	0.0099787
Zm00001d003460_P003	Endoplasmic reticulum vesicle transporter protein	17.85		0.736	0.761		0.865	0.951		1.364	1.16	1.213	0.062061	1.686	0.024442	1.39	0.073384
Zm00001d051685_P002	ADP%2CATP carrier protein 2%2C mitochondrial	42.332	1.162	1.032	1.125	1.051	1.029	1.003	0.914	1.105	0.97	0.929	0.12754	0.901	0.182918	0.97	0.5875
Zm00001d041455_P001	Homocysteine S-methyltransferase 3	36.756	0.557	0.72	0.817	1.059	0.986	0.958	1.192	1.129	0.999	1.434	0.033162	1.585	0.0192962	1.106	0.176599
Zm00001d023327_P004	AccQ84YF7_SORBI] GN=Truncated rp1-4 protein [source:UniProtKB/TrEMBL	180.44	1.02	1.153	1.013	1.445	1.476	1.32	1.538	1.831	1.587	1.331	0.006143	1.556	0.0029552	1.169	0.072802
Zm00001d030627_P006	Probable prefoldin subunit 3	11.384		1.006			0.925			0.858		0.919		0.853		0.928
Zm00001d020219_P004	voltage-dependent anion channel protein1b GN= vdac1b	29.662	1.23	1.26	1.175	1.032	0.937	1.049	0.979	0.892	0.934	0.823	0.0087382	0.765	0.00137614	0.929	0.176238
Zm00001d035736_P001	MACPF domain-containing protein	68.079		0.973	1.024		1.074	1.067		0.938	1.164	1.072	0.113022	1.053	0.71996	0.982	0.8597
Zm00001d045183_P001	Zinc finger CCCH domain-containing protein 4	55.155	1.004	0.973	0.725	1.134	1.24	0.859	0.953	1.137	1.121	1.197	0.30546	1.188	0.20268	0.993	0.98874
Zm00001d036178_P001	Whole genome shotgun sequence of line PN40024 scaffold_2.assembly12x (Fragment)	49.019	0.964	0.824	0.9	0.887	1.05	0.966	1.016	1.226	1.058	1.08	0.31394	1.228	0.049077	1.137	0.165184
Zm00001d032322_P001	Nucleobase-ascorbate transporter 6	58.555			1.17			1.005			0.961	0.859		0.821		0.956
Zm00001d048023_P001	Nuclear pore complex protein NUP133	142.31			1.013			1.032			1.03	1.019		1.017		0.998
Zm00001d048702_P001	benzoxazinone synthesis3 endoplasmic reticulum monoxygenase GN= bx3	58.451	2.753	1.954	1.674	0.779	0.934	0.793	0.424	0.762	0.731	0.393	0.004398	0.3	0.0071223	0.765	0.20614
Zm00001d051422_P001	60S ribosomal protein L6%3B Mitochondrial 60S ribosomal protein L6	11.791		0.941	0.888		0.914	1.001		0.966	1.058	1.047	0.48894	1.107	0.2029	1.057	0.48008
Zm00001d019881_P002	Auxin transport protein BIG	549.69	0.637	0.806	0.678	1.059	0.973	1.044	1.577	1.587	1.678	1.45	0.0074436	2.283	0.00034143	1.574	0.000158772
Zm00001d021686_P003	Receptor-like serine-threonine protein kinase	73.576			0.682			1.054			1.056	1.545		1.548		1.002
Zm00001d022457_P001	peroxidase3 electrophoretic mobility, anodal GN= px3	33.212	0.34	0.527	0.411	0.974	0.964	0.927	1.374	1.231	1.281	2.242	0.023258	3.041	0.0009997	1.356	0.00101948
Zm00001d028474_P020	Beta-galactosidase	75.028		0.962			0.971			1.009		1.009		1.049		1.039
Zm00001d016786_P001	PDIL5-3-Zea mays protein disulfide isomerase	46.469			1.121			0.755			1.103	0.674		0.984		1.461
Zm00001d010871_P001	Thioredoxin F2 chloroplastic	20.974	1.057			1.273			1.087			1.204		1.028		0.854
Zm00001d022456_P001	Peroxidase 42	26.459	0.908	0.92	0.91	0.915	0.844	0.916	1.069	0.879	0.946	0.977	0.47376	1.057	0.4583	1.082	0.29462
Zm00001d033764_P016	Exportin-2	108.32	1.04	1.001	1.031	0.936	0.872	0.955	0.811	0.868	0.885	0.899	0.02346	0.835	0.0032849	0.928	0.122403
Zm00001d039656_P002	NADH-cytochrome b5 reductase-like protein	29.205	1.258			1.008			0.934			0.801		0.742		0.927
Zm00001d008777_P003	DExH-box ATP-dependent RNA helicase DExH10	100.88	0.955	0.79	0.971	1.157	1.109	1.106	1.115	1.041	1.094	1.242	0.031296	1.197	0.057143	0.964	0.21454
Zm00001d046020_P005	Putative VHS/GAT domain containing family protein	34.566	0.684	1.529	0.901	1.007	0.701	1.134	0.917	0.782	1.05	0.913	0.85388	0.883	0.78054	0.967	0.90908
Zm00001d052660_P011	Outer envelope protein 64 chloroplastic	64.485		1.009			1.025			0.946		1.016		0.938		0.923
Zm00001d045926_P002	Mitochondrial glycoprotein family protein	29.579	0.724	0.505	0.883	1.445	1.465	1.137	1.023	1.051	1.02	1.916	0.021621	1.465	0.130601	0.765	0.087098
Zm00001d005713_P005	Annexin	28.359	0.917			0.898			0.825			0.979		0.9		0.919
Zm00001d043795_P001	Glutathione S-transferase GSTU6	25.721	0.297	0.348	0.471	0.824	0.92	1.019	1.076	1.245	0.964	2.476	0.0034367	2.944	0.0020974	1.189	0.149519
Zm00001d021227_P002	Plant UBX domain-containing protein 8	55.471	0.802	0.542	0.698	1.066	1.065	1.178	1.154	1.119	1.109	1.62	0.0143979	1.656	0.046284	1.022	0.5562
Zm00001d037898_P009	Protein kinase superfamily protein	20.06			1.119			1.17			0.872	1.046		0.779		0.745
Zm00001d037359_P001	Peroxidase 11	37.901	0.665	0.868		1.031	1.001		1.32	1.136		1.326	0.16246	1.602	0.089099	1.209	0.134639
Zm00001d016722_P004	Cytochrome b-c1 complex subunit 6	8.2382	1.316	1.207	1.285	1	1.006	0.924	0.863	0.878	1.162	0.769	0.0022245	0.762	0.048404	0.991	0.86562
Zm00001d018795_P077	187-kDa microtubule-associated protein AIR9	180.8	1.063	1.171	1.13	1.105	1.167	1.155	0.949	0.907	0.851	1.019	0.5926	0.805	0.0068405	0.79	0.0027157
Zm00001d028868_P001	Acetate/butyrate--CoA ligase AAE7 peroxisomal	61.693	0.517	0.535	0.785	0.972	0.981	0.981	1.095	1.253	0.965	1.597	0.068025	1.803	0.0172179	1.129	0.26464
Zm00001d006402_P004	Ribulose bisphosphate carboxylase large chain	69.338
Zm00001d028218_P010	Methionine--tRNA ligase cytoplasmic	81.147	1.054	1.214	1.169	1.01	0.941	0.998	0.97	0.93	0.992	0.858	0.033157	0.841	0.020842	0.981	0.53904
Zm00001d017617_P001	Mitochondrial import inner membrane translocase subunit TIM13	9.2903	1.389		1.192	0.91		0.899	1.063		1.051	0.701	0.044243	0.819	0.124297	1.169	0.0028391
Zm00001d019423_P004	Nuclear pore complex protein NUP54	18.039		0.746			0.772			1.403		1.035		1.881		1.817
Zm00001d026669_P002	Cell division protein FtsZ homolog 2-2 chloroplastic	54.162	0.71	0.896	0.969	0.974	0.839	0.886	1.037	0.825	0.867	1.048	0.63032	1.06	0.6242	1.011	0.92646
Zm00001d007577_P001	Transducin/WD40 repeat-like superfamily protein	35.316	0.905	0.759	0.803	0.849	0.86	0.963	0.94	0.941	0.787	1.083	0.2844	1.081	0.38086	0.999	0.96514
Zm00001d003672_P002	40S ribosomal protein S10-1	19.491	0.716	0.571		1.086	0.779		1.076	1.124		1.449	0.21218	1.709	0.042303	1.18	0.39788
Zm00001d048354_P001	glutathione transferase9 GN= gst9	25.877	1.528	1.533	1.485	0.912	1.113	1.12	0.802	0.748	0.873	0.692	0.031896	0.533	0.000160412	0.77	0.033121
Zm00001d050300_P003	RNA-binding (RRM/RBD/RNP motifs) family protein	24.453	1.005			1.005			1.09			1		1.085		1.085
Zm00001d039560_P002	Thioredoxin superfamily protein	28.287	0.539	0.582	0.742	1.469	1.462	1.388	1.069	1.129	0.872	2.318	0.00097682	1.648	0.0155382	0.711	0.0126211
Zm00001d043129_P001	Ulp1 protease family C-terminal catalytic domain containing protein expressed	139.31	0.765	0.866	0.833	0.959	1.017	0.844	1.266	1.253	1.602	1.144	0.114001	1.672	0.0044773	1.461	0.0181205
Zm00001d020686_P001	1-aminocyclopropane-1-carboxylate oxidase2 GN= acco2	36.437	1.196	1.047	1.042	0.844	0.85	0.803	0.717	0.756	0.782	0.76	0.0049615	0.686	0.00192466	0.903	0.029825
Zm00001d047533_P001	Putative receptor-like protein kinase family protein	95.984	1.205	1.477	1.581	1.043	1.35	1.032	1.054	1.119	1.081	0.803	0.139978	0.763	0.034062	0.95	0.65172
Zm00001d014563_P001	Thaumatin-like protein	25.301		1.08			0.93			0.792		0.861		0.733		0.852
Zm00001d035002_P001	ferredoxin5 leaf protein, cDNA clone, distinct amino acid sequence compared to other ferredoxins, gene specific probe (aka pfd5) GN= fdx5	14.552	0.687		0.718	1.017		1.058	1.044		0.808	1.477	0.0057203	1.318	0.175123	0.893	0.447
Zm00001d023887_P001	Acyl carrier protein	15.056	0.993	1.045	0.943	0.696	0.779	0.845	0.955	0.876	0.749	0.778	0.0164198	0.865	0.126023	1.112	0.31378
Zm00001d014674_P001	UDP-sugar pyrophosphorylase	68.322	0.837		0.862	0.706		0.452	0.805		0.725	0.682	0.20948	0.901	0.190422	1.321	0.31822
Zm00001d034516_P006	squalene synthase homolog1 Designation as sqsh1 based on high homology to sqs1 sequence GN= sqsh1	19.912	1.291			0.939			0.814			0.727		0.631		0.867
Zm00001d020110_P001	uncharacterized protein	11.322		1.263			1.218			0.668		0.964		0.529		0.548
Zm00001d029214_P005	TRAF type zinc finger domain containing 1	18.593			0.996			1.007			1.291	1.011		1.296		1.282
Zm00001d018873_P001	Eukaryotic translation initiation factor 3 subunit 2	36.259	0.881	0.953	0.986	0.953	0.908	0.984	1.127	1.034	1.198	1.009	0.82898	1.191	0.032422	1.181	0.027638
Zm00001d042117_P003	Pyrroline-5-carboxylate reductase	27.423		0.851	1.069		0.926	0.936		1.143	1.089	0.97	0.85176	1.163	0.3109	1.199	0.0182443
Zm00001d039211_P005	Notchless-like protein isoform 1%3B Notchless-like protein isoform 2	52.146	0.579	0.681	0.816	0.893	0.962	0.964	1.107	1.07	1.203	1.358	0.036845	1.628	0.0091561	1.199	0.0135594
Zm00001d012267_P001	NPL4-like protein 1	45.589	0.989	1.067	1.005	0.922	0.911	0.95	0.941	0.962	0.942	0.909	0.022498	0.929	0.039743	1.022	0.198716
Zm00001d021893_P002	ARM repeat superfamily protein	123.26	0.813	0.807	0.874	1.276	1.195	1.257	1.053	1.127	1.084	1.495	0.000239	1.309	0.00111605	0.876	0.0089225
Zm00001d015342_P001	Protein LIGHT-DEPENDENT SHORT HYPOCOTYLS 5	26.759	1.175			0.995			1.172			0.847		0.997		1.178
Zm00001d011563_P015	P-loop containing nucleoside triphosphate hydrolases superfamily protein	26.326			1.119			0.959			0.981	0.857		0.877		1.023
Zm00001d014991_P003	Nucleic acid-binding OB-fold-like protein	81.343		1.001			1.032			0.655		1.031		0.654		0.635
Zm00001d053015_P001	Fructose-bisphosphate aldolase	42.429	1.165	1.028	1.108	1.24	1.266	1.029	1.044	1.098	1.082	1.071	0.43292	0.977	0.59758	0.912	0.26252
Zm00001d010813_P001	receptor like protein 29	48.944		1.383			0.74			1.157		0.535		0.837		1.564
Zm00001d042654_P007	Beta-galactosidase	44.13	0.991			1.222			1.354			1.233		1.366		1.108
Zm00001d043517_P004	Peptidase M28 family protein	9.2905			0.808			1.029			1.347	1.274		1.667		1.309
Zm00001d012446_P004	V-type proton ATPase subunit a1	88.748			0.917			1.088			1.052	1.186		1.147		0.967
Zm00001d048095_P030	DExH-box ATP-dependent RNA helicase DExH14	195.23		0.957			0.945			0.952		0.987		0.995		1.007
Zm00001d002141_P023	UBP1-associated protein 2A	52.888	0.358	0.906	0.547	1.081	1.226	1.323	0.981	1.029	0.984	2.004	0.049862	1.653	0.1662	0.825	0.035843
Zm00001d031488_P003	Tetraketide alpha-pyrone reductase 1	25.687		1.035			0.909			1.008		0.878		0.974		1.109
Zm00001d010500_P001	ERBB-3 BINDING PROTEIN 1	43.092	1.077	1.216	1.17	1.026	1.039	0.96	0.991	0.874	0.955	0.874	0.036236	0.814	0.0164593	0.932	0.18702
Zm00001d031026_P001	Cell-cell signaling protein csgA-like	33.089	1.135	1.032	0.895	1.106	1.03	1.078	0.938	1.05	1.088	1.05	0.50504	1.005	0.93346	0.957	0.40916
Zm00001d034365_P001	Syntaxin 121	33.217	0.693	0.798		1.074	1.167		1.274	1.321		1.503	0.037779	1.74	0.0167004	1.158	0.082921
Zm00001d031939_P002	40S ribosomal protein S25-2	6.9861		1.004			0.99			1.019		0.986		1.015		1.029
Zm00001d028243_P001	Glucan endo-13-beta-glucosidase 3	53.51			1.251			1.059			0.835	0.847		0.667		0.788
Zm00001d029243_P001	Cytochrome P450 84A1	58.37	1.275	1.175	1.044	0.979	1.247	1.276	1.084	0.974	1.324	1.002	0.9902	0.968	0.74422	0.966	0.7848
Zm00001d021775_P001	Sugar carrier protein C	56.913	0.249			1.29			1.032			5.181		4.145		0.8
Zm00001d033795_P008	Dihydroxyacetone kinase	56.56	0.999	1.053	1.063	0.981	0.95	0.894	0.988	0.962	0.935	0.907	0.042477	0.926	0.037676	1.021	0.53288
Zm00001d014159_P061	Protein NETWORKED 1A	63.181		0.859			1.063			0.97		1.237		1.129		0.913
Zm00001d022134_P001	Elongation factor 1-beta	24.853	1.485	1.538	1.166	1.055	1.158	1.155	1.155	1.108	1.209	0.804	0.083461	0.829	0.116457	1.031	0.482
Zm00001d014159_P060	Protein NETWORKED 1A	99.699	0.752			0.9			1.125			1.197		1.496		1.25
Zm00001d021551_P004	Ras-related protein RABH1b	22.929	1.166	1.098	1.094	1.048	1.001	0.984	0.906	0.984	0.954	0.903	0.021962	0.847	0.0063416	0.938	0.102202
Zm00001d042661_P001	Serine hydroxymethyltransferase 7	64.101			0.768			0.984			1.168	1.281		1.521		1.187
Zm00001d046234_P002	Inositol oxygenase 2	35.467	0.36	0.384	0.346	1.253	1.091	1.158	1.134	1.349	1.346	3.213	2.0242e-05	3.513	4.1303e-05	1.093	0.27938
Zm00001d044266_P010	ATP-dependent zinc metalloprotease FTSH 4 mitochondrial	76.393	0.605	0.828		1.034	0.995		1.083	0.96		1.416	0.150558	1.426	0.161959	1.007	0.94148
Zm00001d022238_P001	Transmembrane emp24 domain-containing protein p24delta9	25.865	1.022	0.804	1.472	0.753	0.994	0.572	1.075	1.027	0.794	0.703	0.21854	0.878	0.6192	1.249	0.2669
Zm00001d052684_P001	O-methyltransferase ZRP4	39.048	0.584	0.614	0.522	0.72	0.614	0.726	0.281	0.344		1.198	0.068601	0.545	0.0082755	0.455	0.0046358
Zm00001d035588_P001	Serine/threonine-protein kinase	93.961	0.984			0.756			1.02			0.768		1.037		1.349
Zm00001d035960_P028	DNA-directed RNA polymerase III subunit 2	61.006	0.774			0.845			0.872			1.092		1.127		1.032
Zm00001d053151_P001	Putative POX domain/homeobox DNA-binding domain family protein	44.714
Zm00001d010859_P001	Proline synthase co-transcribed bacterial homolog protein	26.22	0.818		0.578	1.119		0.963	0.993		1.492	1.491	0.161364	1.78	0.166384	1.194	0.53952
Zm00001d024759_P002	Peptide chain release factor 1	43.18	1.127		0.973	0.926		0.772	1.105		0.404	0.809	0.20878	0.719	0.47004	0.889	0.69038
Zm00001d023516_P001	Salt stress-induced protein	13.453	0.557	0.527	0.395	1.015	1.042	1.082	0.858	0.816	0.769	2.122	0.0021232	1.652	0.0099959	0.778	0.002378
Zm00001d029061_P001	PPR containing plant-like protein	59.843	0.214	0.081		0.381			0.465	0.088		2.583		1.875	0.69946	0.726
Zm00001d019775_P001	uncharacterized protein	10.283	1.005			1.093			1.141			1.088		1.135		1.044
Zm00001d003464_P004	uncharacterized protein	28.846		1.193			1.095			0.835		0.918		0.7		0.763
Zm00001d016787_P001	SLL1 protein	10.259	0.682	0.65		0.84	1.044		0.92	1.269		1.414	0.092056	1.643	0.096684	1.162	0.5378
Zm00001d031696_P002	Peptidyl-prolyl cis-trans isomerase FKBP16-3 chloroplastic	23.863			1.386			0.8			0.719	0.577		0.519		0.899
Zm00001d025694_P001	Surfeit locus protein 2 (SURF2)	29.879			0.661			1.707			0.909	2.582		1.375		0.533
Zm00001d020139_P001	Cysteine desulfurase mitochondrial	49.65	0.933	1.005	0.954	1.046	1.004	0.973	1.071	1.126	1.049	1.045	0.21832	1.122	0.0192039	1.074	0.074504
Zm00001d022614_P003	nucleosome/chromatin assembly factor 104 First identified by the Maize Chromatin Project, who supplied map scores to the Maize Mapping Project towards placement on the CIMDE IBM maps. GN= nfc104a	35.794	0.817			1.12			1.06			1.371		1.297		0.946
Zm00001d006183_P001	Vacuolar protein sorting-associated protein 22 homolog 1	28.086	1.09	1.13	1.154	0.98	1.059	0.968	0.967	0.993	0.923	0.891	0.024038	0.854	0.0043618	0.959	0.30244
Zm00001d006422_P009	Peptide-N(4)-(N-acetyl-beta-glucosaminyl)asparagine amidase	70.725	0.972	1.122	1.068	1.243	0.989	1.067	1.463	1.009	1.065	1.043	0.64374	1.119	0.46296	1.072	0.67562
Zm00001d047766_P001	Ribosomal protein S24e family protein	25.877	1.058	0.991	0.917	0.802	0.794	0.934	0.903	0.904	0.865	0.853	0.07478	0.901	0.078657	1.056	0.3532
Zm00001d008299_P002	Peroxidase 72	35.998		1.268			0.998			1.065		0.787		0.84		1.067
Zm00001d009359_P001	Ubiquitin fusion degradation UFD1 family protein	63.121	0.362	0.639	0.828	1.21	1.1	1.147	1.172	1.301	1.243	1.89	0.106495	2.032	0.090037	1.075	0.152859
Zm00001d030021_P003	BR-signaling kinase 2	44.137	1.444			0.994			0.902			0.688		0.625		0.907
Zm00001d041789_P002	uncharacterized protein	39.946	0.666			0.896			1.037			1.345		1.557		1.157
Zm00001d001988_P004	putative protein phosphatase 2C 16 GN= prh16	30.659	1.035			0.979			0.928			0.946		0.897		0.948
Zm00001d045366_P002	ferredoxin-thioredoxin1 cDNA sequence GN= ftr1	16.74		1.039			0.98			0.895		0.943		0.861		0.913
Zm00001d026426_P006	ABC transporter B family member 19	98.784	0.627		0.78	1.005		0.942	1.25		1.026	1.384	0.101163	1.618	0.081956	1.169	0.28154
Zm00001d044433_P006	leunig-related1 GN= lug1	44.922	1.049			0.994			1.011			0.948		0.964		1.017
Zm00001d029387_P005	LOL3	23.39		0.743			0.831			0.407		1.118		0.548		0.49
Zm00001d040356_P001	geranylgeranyl hydrogenase2 GN= ggh2	47.864
Zm00001d051065_P008	Nuclear cap-binding protein subunit 2	17.015			1.069			0.994			1.077	0.93		1.007		1.084
Zm00001d045394_P001	Zinc finger protein%3B Zinc finger protein isoform 1%3B Zinc finger protein isoform 2	42.918	0.978	0.996	0.617	1.001	1.038	0.916	1.092	1.264	1.304	1.14	0.39516	1.413	0.092319	1.239	0.032503
Zm00001d017199_P001	Temperature-induced lipocalin-1	22.596	1.336	1.322	1.192	1.173	1.12	1.212	1.042	1.096	1.047	0.91	0.096304	0.827	0.0090418	0.909	0.027018
Zm00001d047812_P001	Oxysterol-binding protein-related protein 3B	52.228	0.957	0.881	0.934	0.885	0.877	0.874	1.296	1.3	1.13	0.951	0.183223	1.344	0.0049186	1.414	0.0176821
Zm00001d009653_P009	60S acidic ribosomal protein P2A	11.353	1.064	0.905	0.83	1.328	2.54	1.846	1.438	1.606	1.164	2.041	0.027102	1.503	0.027499	0.736	0.25268
Zm00001d032476_P001	Probable methyltransferase PMT18	55.047	0.708	0.753	0.704	1.332	1.265	1.223	0.769	0.947	0.73	1.764	6.2986e-05	1.13	0.2317	0.64	0.0056046
Zm00001d009125_P010	Carbohydrate-binding-like fold	117.11	0.96	0.974		0.947	0.972		0.988	0.99		0.992	0.6512	1.023	0.091159	1.031	0.145758
Zm00001d019706_P007	UNC-50 family protein	8.5218	1.028	0.806	0.996	0.971	1.084	0.93	0.853	0.908	0.923	1.055	0.55716	0.948	0.58222	0.899	0.111978
Zm00001d034701_P019	Protein DEFECTIVE IN EXINE FORMATION 1	70.104		0.711			1.324			1.317		1.862		1.852		0.995
Zm00001d031542_P001	Serrate RNA effector molecule	72.775	0.761	1.008	0.915	1.005	1.037	1.027	1.056	1.108	1.042	1.143	0.2321	1.194	0.095004	1.045	0.105482
Zm00001d048362_P001	Mitochondrial outer membrane protein porin 4	29.595	0.905	1.004	0.954	1.01	0.76	0.902	0.865	1.053	1.003	0.933	0.4423	1.02	0.80474	1.093	0.41468
Zm00001d047424_P001	Flavonoid 3'-monooxygenase	56.76	1.433	1.464	1.222	1.25	1.118	1.075	0.909	0.953	1.024	0.836	0.070498	0.701	0.006065	0.838	0.036757
Zm00001d051676_P006	ADP-ribosylation factor GTPase-activating protein AGD12	24.437
Zm00001d049683_P001	Probable L-gulonolactone oxidase 6	64.766			0.793			0.677			0.923	0.854		1.164		1.363
Zm00001d043251_P001	uncharacterized protein	7.9188			0.764			0.937			1.266	1.226		1.657		1.351
Zm00001d033505_P001	Ribosomal protein S5/Elongation factor G/III/V family protein	114.57	0.844	0.24	0.57	1.169	1.088	0.916	1.096	1.213	1.104	1.918	0.11144	2.063	0.150942	1.076	0.38712
Zm00001d033338_P001	NAD(P)-linked oxidoreductase superfamily protein	33.844			0.768			0.895			0.677	1.165		0.882		0.756
Zm00001d037684_P001	uncharacterized protein	9.0296	0.403	0.37	0.764	1.07	1.017	1.843	0.919	0.913	1.486	2.557	0.0325	2.159	0.046421	0.844	0.55984
Zm00001d028742_P001	fatty acid desaturase8 leaf cDNA and genomic clones with sequence similarity to Arabidopsis FAD7 GN= fad8	49.617		0.244			1.612			0.888		6.607		3.639		0.551
Zm00001d023756_P005	uncharacterized protein	28.406		1.008			1.095			0.968		1.086		0.96		0.884
Zm00001d052816_P001	RNA-binding (RRM/RBD/RNP motifs) family protein	64.708
Zm00001d004048_P001	Xanthoxin dehydrogenase	27.916	1.239	1.228	1.389	1.043	0.943	1.319	1.21	1.07	1.185	0.857	0.2032	0.899	0.123843	1.048	0.6271
Zm00001d012510_P001	Putative cytochrome P450 superfamily protein	43.92			1.167			0.996			1.115	0.853		0.955		1.119
Zm00001d027619_P002	beta amylase2 electrophoretic mobility GN= amyb2	61.636	0.912	1.168	1.314	1.063	0.897	1.121	0.866	0.773	0.713	0.908	0.51782	0.693	0.041895	0.763	0.037555
Zm00001d007324_P005	uncharacterized protein	9.3075	0.485		0.448	0.645		0.307	0.286		0.095	1.02	0.9124	0.408	0.20062	0.4	0.2736
Zm00001d035872_P001	Nucleic acid-binding OB-fold-like protein	18.077		0.794	0.785		0.837	1.075		0.91	1.208	1.211	0.2804	1.341	0.183319	1.108	0.64916
Zm00001d010179_P001	Putative subtilase family protein	80.319			1.484			1.326			1.142	0.894		0.77		0.861
Zm00001d039535_P001	HXXXD-type acyl-transferase family protein	46.133	0.972	0.962	1.016	0.978	1.062	1.023	1.215	1.186	1.242	1.038	0.26938	1.235	0.00059632	1.189	0.0031192
Zm00001d042950_P001	Lung seven transmembrane receptor family protein	50.408	0.56	0.618	0.469	1.197	1.184	1.204	1.252	1.11	1.241	2.177	0.0104634	2.188	0.00092023	1.005	0.93582
Zm00001d036796_P004	Zinc finger CCCH domain-containing protein 52	31.253
Zm00001d014787_P004	DEAD-box ATP-dependent RNA helicase 10	25.051		0.805			1.04			1.424		1.292		1.769		1.369
Zm00001d024963_P001	glutathione transferase22 GN= gst22	25.389	1.714	1.832	1.695	1.151	1.073	1.106	0.977	1.009	0.941	0.635	0.000138998	0.558	5.534e-05	0.879	0.0107758
Zm00001d015209_P051	Histone acetyltransferase HAC1	27.879
Zm00001d012137_P004	Protein kinase	24.934		0.436			1.117			1.187		2.562		2.722		1.063
Zm00001d006127_P001	Probable transcription factor PosF21	17.553		0.996			1.247			0.97		1.252		0.974		0.778
Zm00001d019249_P004	Protein RETICULATA chloroplastic	44.985	1.154	1.022	1.074	1.026	1.099	1.051	1.065	1	0.929	0.977	0.61376	0.921	0.194742	0.943	0.24616
Zm00001d048372_P002	Glutamyl-tRNA synthetase%2C cytoplasmic	80.946	1.133	0.595		1.225	0.91		1.025	0.969		1.236	0.55182	1.154	0.60976	0.934	0.7395
Zm00001d008691_P004	Autophagy-related protein 18c	42.325		0.397	0.344		0.938	1.142		1.106	1.107	2.807	0.013681	2.987	0.041537	1.064	0.62024
Zm00001d014532_P001	Protein IRX15-LIKE	33.774	0.867	0.809	1.138	1.45	1.065	1.231	1.021	1.186	1.171	1.331	0.102477	1.2	0.170103	0.902	0.38902
Zm00001d010056_P017	proline responding1 (allele o6) crumpled opaque kernel GN= pro1	77.707	0.873	0.931	0.905	0.915	0.902	0.962	1.027	1.043	1.019	1.026	0.39844	1.14	0.0026788	1.112	0.006843
Zm00001d014919_P004	Glycerate dehydrogenase HPR peroxisomal	44.508	1.073	1.025	0.959	1.212	1.262	1.207	1.121	1.016	1.069	1.204	0.0063177	1.049	0.33058	0.871	0.011975
Zm00001d047603_P001	L-Aspartase-like family protein	60.58	0.981	0.877	0.969	0.983	0.915	0.899	0.927	0.876	0.72	0.989	0.83136	0.892	0.23372	0.902	0.25442
Zm00001d038101_P002	uncharacterized protein	86.832	1.077	1.095		1.101	1.067		0.886	1.107		0.998	0.92322	0.918	0.49592	0.919	0.50652
Zm00001d013254_P003	ABC transporter B family member 27	48.492
Zm00001d001800_P001	GDSL esterase/lipase CPRD49	22.645	0.903	0.843	0.938	0.876	0.734	0.805	0.753	0.717	0.634	0.9	0.147755	0.784	0.0150008	0.871	0.129237
Zm00001d030584_P001	DROUGHT SENSITIVE 1	51.802		0.819	0.763		1.042	1.121		0.981	1.061	1.367	0.025461	1.291	0.040303	0.944	0.39444
Zm00001d026195_P005	Transducin family protein / WD-40 repeat family protein	84.522	1.375			2.036			1.766			1.481		1.284		0.867
Zm00001d001809_P009	RNA polymerase II transcription factor B subunit 2	51.521	1.066		1.042	1.004		0.925	0.945		1.035	0.915	0.169964	0.939	0.30774	1.026	0.7134
Zm00001d007581_P001	harpin binding protein1 GN= hrbp1	29.255	0.793	0.854	0.774	0.924	0.959	0.944	0.876	0.836	0.959	1.168	0.0077752	1.103	0.122822	0.945	0.23482
Zm00001d033981_P001	ATP sulfurylase1 mRNA differentially diminished in early- vs. late-senescing lines GN= aps1	53.615		0.613			1.109			1.11		1.809		1.811		1.001
Zm00001d044147_P001	cytochrome P450 family 72 subfamily A polypeptide 8	52.46		0.405	0.497		0.547	0.59		1.44	1.384	1.261	0.163001	3.131	0.0081751	2.484	0.0021976
Zm00001d029422_P019	uncharacterized protein	191.35	0.315	0.505		1.084	1.106		1.266	1.272		2.671	0.050595	3.095	0.128058	1.159	0.0048593
Zm00001d040302_P006	Zinc finger CCCH type domain-containing protein ZFN-like 1	23.953	0.702			1.115			1.253			1.588		1.785		1.124
Zm00001d015026_P004	Spermine synthase	41.803	1.073	1.011	1.062	0.887	0.817	0.992	1.109	0.9	0.99	0.857	0.056575	0.953	0.46284	1.112	0.26808
Zm00001d017905_P001	BSD domain-containing protein	33.554		0.8			0.996			1.272		1.245		1.59		1.277
Zm00001d023343_P001	Non-specific lipid-transfer protein	11.75	1.215	1.253	1.176	1.03	0.949	0.936	0.926	0.87	1.117	0.8	0.0030816	0.799	0.041284	0.999	0.9488
Zm00001d039916_P010	Octicosapeptide/Phox/Bem1p family protein	69.623	0.434	0.855		1.405	1.392		1.11	0.767		2.17	0.2466	1.456	0.39472	0.671	0.26632
Zm00001d017335_P001	Protein PEROXIN-4	17.768		1.285	1.011		1.001	1.033		1.199	1.131	0.886	0.44498	1.015	0.87804	1.146	0.054959
Zm00001d022462_P001	60S ribosomal protein L18-3	21.043	1.09	1.166	1.153	0.979	1.05	0.963	0.965	0.99	0.957	0.878	0.0178985	0.854	0.0024789	0.973	0.40376
Zm00001d036905_P006	Transducin/WD40 repeat-like superfamily protein	32.086		0.59	0.691		0.989	1.096		1.031	0.885	1.628	0.0352	1.496	0.067004	0.919	0.44812
Zm00001d051998_P016	AP-1 complex subunit gamma-1	54.785		0.868	1.024		0.997	0.95		1.369	1.059	1.029	0.74748	1.283	0.25026	1.247	0.24478
Zm00001d036447_P004	uncharacterized protein	16.955			0.653			1.099			1.135	1.683		1.738		1.033
Zm00001d044599_P005	Nonphototropic hypocotyl 1	44.883	1.397	1.42		1.44	1.548		0.977	1.302		1.061	0.25636	0.809	0.2624	0.763	0.198679
Zm00001d003930_P001	Beta-13-N-Acetylglucosaminyltransferase family protein	13.99	1.479	1.716	1.555	1.069	0.907	1.054	1.067	1.163	1.11	0.638	0.0027431	0.703	0.0022171	1.102	0.162382
Zm00001d029910_P001	ARF guanine-nucleotide exchange factor GNOM	158.82			0.647			1.145			1.24	1.77		1.917		1.083
Zm00001d050967_P001	Isocitrate dehydrogenase [NAD] regulatory subunit 3 mitochondrial	26.599	1.138	1.271	1.092	0.926	0.929	1.116	0.875	0.881	0.653	0.849	0.095984	0.688	0.024682	0.811	0.138156
Zm00001d016891_P003	Beta-13-galactosyltransferase 7	17.804		0.751			1.095			1.137		1.458		1.514		1.038
Zm00001d052391_P001	protein GN=Expressed protein	23.238	0.634			1.062			1.282			1.675		2.022		1.207
Zm00001d016691_P001	Copper transport protein CCH	11.347	0.968	0.788	1.098	1.021	0.908	1.093	1.124	1.124	1.128	1.059	0.59734	1.183	0.20836	1.117	0.170717
Zm00001d053622_P003	putative zinc finger protein30 GN= zfp30	18.906		0.729			0.932			0.946		1.278		1.298		1.015
Zm00001d010835_P002	Arginine--tRNA ligase chloroplastic/mitochondrial	67.04	1.245	1.258	1.056	1.043	0.925	1.182	1.053	1.102	1.185	0.885	0.24352	0.938	0.40586	1.06	0.47226
Zm00001d021340_P001	uncharacterized protein	25.985		1.211			1.041			0.837		0.86		0.691		0.804
Zm00001d049134_P002	uncharacterized protein	16.373	0.972		1.341	0.834		0.847	0.934		1.186	0.727	0.197617	0.917	0.72408	1.261	0.20094
Zm00001d028240_P001	50S ribosomal protein L15 chloroplastic	28.237	0.732	0.588	0.748	0.964	1.14	1.015	0.685	0.924	1.075	1.508	0.0105981	1.298	0.178619	0.861	0.30864
Zm00001d048703_P001	benzoxazinone synthesis4 endoplasmic reticulum P450 monoxygenase GN= bx4	59.266	1.157	1.593	1.431	0.812	0.742	0.773	0.614	0.426	0.561	0.557	0.0040601	0.383	0.0026413	0.688	0.027096
Zm00001d049049_P002	Pyruvate kinase	57.292	1.15	1.239	1.216	0.996	1.112	1.035	1.072	1.101	1.076	0.872	0.024785	0.901	0.0123168	1.034	0.36372
Zm00001d025893_P005	Phosphoenolpyruvate carboxylase family protein	46.285	1.182			0.96			0.818			0.812		0.692		0.852
Zm00001d033594_P002	Myelin-associated oligodendrocyte basic protein isoform 1	39.888			0.885			1.236			0.883	1.397		0.998		0.714
Zm00001d032400_P001	Probable dolichyl-diphosphooligosaccharide--protein glycosyltransferase subunit 3B	37.951			1.098			0.759			0.793	0.691		0.722		1.045
Zm00001d034494_P001	Actin cross-linking protein	40.973		0.832	0.79		1.084	0.81		0.883	0.977	1.168	0.43102	1.147	0.13912	0.982	0.9596
ZemaCp109	uncharacterized protein	30.035	0.798			0.942			1.033			1.18		1.294		1.097
Zm00001d015217_P001	Salicylate/benzoate carboxyl methyltransferase	44.557	1.547	1.364	1.669	1.489	1.644	1.382	1.287	1.323	1.302	0.986	0.87098	0.854	0.121715	0.866	0.109543
Zm00001d025998_P001	Ubiquitin carboxyl-terminal hydrolase 3	24.561	0.404	0.791	0.254	1.198	1.099	1.404	1.387	1.168	1.116	2.554	0.036664	2.533	0.037082	0.992	0.94322
Zm00001d015731_P001	IAA-amino acid hydrolase ILR1	46.526
Zm00001d054065_P001	60S ribosomal protein L37-3	10.679	0.52	0.811	0.251	1.288	1.163	1.331	1.06	0.921	1.17	2.391	0.104682	1.992	0.085442	0.833	0.082184
Zm00001d012889_P001	uncharacterized protein	23.292	1.449	1.159	1.247	0.943	0.986	1.066	0.867	0.747	0.88	0.777	0.029081	0.647	0.00668	0.833	0.04372
Zm00001d018529_P001	uncharacterized protein	47.527	1.137	0.973	0.687	1.244	0.818	0.914	1.121	1.104	1.179	1.064	0.747	1.217	0.28484	1.144	0.35864
Zm00001d035574_P003	E3 UFM1-protein ligase 1 homolog	55.758			1.278			1.16			0.918	0.908		0.718		0.791
Zm00001d030173_P009	Calmodulin-binding receptor-like cytoplasmic kinase 3	37.634			1.139			1.09			0.897	0.957		0.788		0.823
Zm00001d028230_P001	Sugar transport protein 13	56.685	0.573			1.188			1.541			2.073		2.689		1.297
Zm00001d014816_P001	Senescence-associated protein DIN1	20.022			0.825			1.226			1.106	1.486		1.341		0.902
Zm00001d001765_P001	Exocyst complex component EXO70A1	72.305	1.149	1.203	1.141	1.141	1.099	1.006	0.944	0.978	1.012	0.929	0.142499	0.84	0.0025816	0.904	0.077576
Zm00001d012992_P002	40S ribosomal protein S26-3	14.791	0.713	0.996	0.855	1.049	0.977	1.032	0.854	0.931	0.855	1.193	0.134976	1.03	0.72758	0.863	0.014619
Zm00001d047139_P001	Plasma membrane	16.932		0.984			0.739			0.625		0.751		0.635		0.846
Zm00001d016060_P001	B-cell receptor-associated protein 31-like containing protein	24.803	0.937		1.11	1.251		1.122	1.115		1.046	1.159	0.275	1.056	0.5917	0.911	0.27986
Zm00001d011309_P026	Transcriptional corepressor LEUNIG	40.81
Zm00001d050551_P002	ubiquitin-associated (UBA)/TS-N domain-containing protein	43.908	0.928	0.7	0.801	1.053	0.942	0.919	0.896	1.101	1.099	1.2	0.110744	1.275	0.082802	1.062	0.51088
Zm00001d012420_P004	Heat shock 70 kDa protein	70.882	1.267	1.313	1.292	0.972	0.781	0.897	0.798	0.751	0.852	0.684	0.0040794	0.62	0.00022232	0.906	0.26202
Zm00001d043813_P004	Regulator of Vps4 activity in the MVB pathway protein	35.128			1.121			0.967			0.911	0.863		0.813		0.942
Zm00001d027893_P001	lipoxygenase9 GN= lox9	108.27	0.972			1.085			1.034			1.116		1.064		0.953
Zm00001d028671_P021	ABC transporter B family member 6	91.468			1.149			1.194			0.887	1.039		0.772		0.743
Zm00001d048609_P001	Serine/arginine-rich SC35-like splicing factor SCL30	32.638	0.498			1.262			1.211			2.534		2.432		0.96
Zm00001d039613_P001	Has 43784 Blast hits to 26928 proteins in 1799 species Archae - 86 GN=BEST Arabidopsis thaliana protein match is: copper ion binding (TAIR:AT4G32610.1)	27.926		0.453	0.425		1.825	1.489		1.242	1.589	3.774	0.0064232	3.224	0.0117441	0.854	0.42226
Zm00001d041243_P001	Probable malate dehydrogenase glyoxysomal	37.809	0.913	0.792	0.729	0.743	0.815	0.816	1.113	0.951	1.13	0.975	0.78152	1.312	0.033417	1.345	0.0096043
Zm00001d006555_P001	60S ribosomal protein L38	13.841	1.254		1.132	1.096		0.961	0.864		1.198	0.862	0.21512	0.864	0.45376	1.002	0.96506
Zm00001d023658_P007	aminopeptidases	56.843	1.165		1.239	1.187		1.106	0.964		0.946	0.954	0.41816	0.795	0.0191041	0.833	0.038021
Zm00001d036801_P001	Phosphoribosylanthranilate transferase isoform 1%3B Phosphoribosylanthranilate transferase isoform 2%3B Phosphoribosylanthranilate transferase isoform 3	89.459	0.663		0.596	1.202		1.25	1.092		1.072	1.948	0.0071422	1.719	0.0097637	0.883	0.028801
Zm00001d011779_P015	transducin family protein / WD-40 repeat family protein	42.136		1.07	1.097		1.137	1.147		1.102	1.12	1.054	0.057541	1.025	0.2332	0.973	0.095957
Zm00001d038547_P001	Glutamate-1-semialdehyde 21-aminomutase 2 chloroplastic	50.164	0.986	1.041	1.037	0.981	0.989	1.036	1.059	1.027	0.938	0.981	0.47728	0.987	0.74382	1.006	0.908
Zm00001d022188_P003	Copper-transporting atpase paa1	16.225	0.861	0.966	1.031	0.841	0.767	0.859	1.04	0.934	0.957	0.863	0.08238	1.026	0.68634	1.188	0.022336
Zm00001d039453_P002	3-epi-6-deoxocathasterone 23-monooxygenase	56.567	0.408		0.686	1.09		1.042	1.377		1.175	1.949	0.115182	2.333	0.08398	1.197	0.165036
Zm00001d010620_P001	proline-rich family protein	60.912			1.88			0.656			0.496	0.349		0.264		0.756
Zm00001d011877_P007	Protein OSB2 chloroplastic	12.364		0.806			1.031			0.78		1.279		0.968		0.757
Zm00001d025590_P029	ABC transporter B family member 19	107.41		1.014	0.936		0.908	0.776		0.963	0.919	0.864	0.23318	0.965	0.52934	1.118	0.29884
Zm00001d029353_P004	benzoxazinone synthesis12 GN= bx12	24.943	0.594	0.371	0.361	1.03	1.119	1.261	1.507	1.509	1.629	2.572	0.0048967	3.503	0.0159568	1.362	0.0082575
Zm00001d017860_P003	Fimbrin-1	72.957			1.219			1.217			0.881	0.998		0.723		0.724
Zm00001d037599_P007	kinesin-related protein9 Is a member of MCAK family and may depolymerize microtubules per C. Lawrence. GN= krp9	85.672	0.952		0.525	1.232		1.156	0.727		0.832	1.617	0.22232	1.056	0.78414	0.653	0.029035
Zm00001d036727_P001	alpha/beta-Hydrolases superfamily protein	60.002	1.008		1.1	1.063		1.132	1.163		1.033	1.041	0.5266	1.042	0.64062	1	0.99152
Zm00001d048546_P006	transcription regulators	275.49
ZemaCp044	uncharacterized protein	7.748			0.531			1.18			0.923	2.222		1.738		0.782
Zm00001d001856_P007	Anamorsin homolog	27.459	0.871	0.933	0.927	0.897	0.909	0.929	0.932	0.976	0.969	1.001	0.94314	1.053	0.116276	1.052	0.045441
Zm00001d010614_P002	40S ribosomal protein S26	12.15	1.026	1.054		0.994	1.059		1.036	0.977		0.987	0.73314	0.968	0.413	0.981	0.6942
Zm00001d025726_P001	Putative leucine-rich repeat transmembrane protein kinase family protein	67.429	1.184	1.028	1.024	1.068	1.099	1.345	1.086	1.282	1.047	1.085	0.41578	1.055	0.5424	0.972	0.79488
Zm00001d029811_P001	zinc knuckle (CCHC-type) family protein	28.552	0.806	1.003	1.055	1.254	1.204	1.001	1.134	0.868	0.835	1.208	0.151745	0.991	0.9272	0.82	0.162057
Zm00001d048856_P002	seryl-tRNA synthetase complements E. coli mutant GN= ser2	48.562	0.403	0.832	0.681	1.019	1.075	1.114	1.047	0.953	0.951	1.674	0.12416	1.54	0.161784	0.92	0.109962
Zm00001d016716_P002	Integrin beta-1-binding protein 2	24.841	0.63			0.843			0.886			1.338		1.406		1.051
Zm00001d032582_P006	uncharacterized protein	19.375	1.091		0.81	1.204		1.264	1.038		1.347	1.298	0.21346	1.255	0.366	0.966	0.77948
Zm00001d037164_P001	Peptidase M20/M25/M40 family protein	48.332	0.911	0.958	0.886	0.944	0.909	0.963	1.002	0.997	1.053	1.022	0.47986	1.108	0.023421	1.084	0.029636
ZemaCp004	uncharacterized protein	10.09	0.756		1.035	1.007		0.833	0.792		0.718	1.027	0.86714	0.843	0.43442	0.821	0.21032
Zm00001d015208_P001	Cleavage and polyadenylation specificity factor (CPSF) A subunit protein	131.25	0.935	0.844		1.148	1.136		1.08	1.053		1.284	0.039517	1.199	0.074164	0.934	0.037818
Zm00001d033710_P001	Chemocyanin	13.721	0.522	0.447	0.497	0.858	0.545	0.518	0.737	0.635	0.492	1.31	0.21506	1.271	0.145139	0.97	0.93648
Zm00001d003958_P013	Calmodulin-binding transcription activator 4	110.42			1.07			1.069			1.045	0.999		0.977		0.978
Zm00001d004070_P002	RNA-binding protein-like	51.044			0.597			0.985			1.134	1.65		1.899		1.151
Zm00001d012765_P006	Peptidase M28 family protein	41.084		1.037	1.229		1.035	1.271		1.227	0.887	1.018	0.91628	0.933	0.70846	0.917	0.67048
Zm00001d049563_P008	Probable RNA polymerase II transcription factor B subunit 1-1	44.571			0.732			0.919			1.168	1.255		1.596		1.271
Zm00001d018512_P002	Ubiquitin carboxyl-terminal hydrolase 2	37.564	1.186	1.087	1.152	0.948	1.004	0.926	1.013	1.075	0.898	0.84	0.007744	0.872	0.07692	1.038	0.58318
Zm00001d013358_P018	DEAD-box ATP-dependent RNA helicase 16	37.488		0.413			1.216			1.788		2.944		4.329		1.47
Zm00001d053259_P001	Probable protein phosphatase 2C 74	35.921	0.499			0.959			1.059			1.922		2.122		1.104
Zm00001d028963_P001	14 kDa zinc-binding protein	14.229	1.39	1.196	1.305	0.802	0.818	0.777	1.008	0.981	1.012	0.616	0.00046458	0.771	0.0044623	1.252	0.00023519
Zm00001d018809_P001	glutathione transferase6 cDNA, functionally expressed in E. coli GN= gst6	25.118	1.96	2.095	2.001	1.447	1.444	1.351	1.347	1.279	1.701	0.7	0.00028281	0.714	0.0187203	1.02	0.8971
Zm00001d050395_P004	GDT1-like protein 4	22.076	0.983		1.073	0.961		1.14	1.103		1.039	1.022	0.8616	1.042	0.5159	1.02	0.82666
Zm00001d044600_P008	RNA binding (RRM/RBD/RNP motifs) family protein	18.479	0.759			0.918			0.916			1.209		1.207		0.998
Zm00001d023420_P001	Protein TERMINAL FLOWER 1	19.534
Zm00001d039514_P003	Clavaminate synthase-like protein	35.885	1.282	1.243	1.15	1.037	1.042	1.036	1.125	1.091	1.132	0.848	0.036704	0.911	0.054538	1.075	0.024745
Zm00001d036448_P012	Putative MAP kinase family protein	51.689	1.008			0.989			0.945			0.981		0.938		0.956
Zm00001d028905_P001	Phytochrome B	127.78	0.667	1.141	1.033	1.009	0.956	0.88	0.858	0.742	0.812	1.001	0.88746	0.849	0.45786	0.848	0.046601
Zm00001d018471_P003	Nucleic acid-binding OB-fold-like protein	20.256	1.044	0.948		1.153	1.048		1.002	1.148		1.105	0.27922	1.079	0.46238	0.977	0.79498
Zm00001d007900_P004	Eukaryotic translation initiation factor 3 subunit I	36.287		1.095	0.99		0.821	0.951		0.941	0.891	0.85	0.20694	0.879	0.1543	1.034	0.6941
Zm00001d011513_P001	Polynucleotidyl transferase ribonuclease H-like superfamily protein	47.1	1.004	0.853		0.856	1.022		0.752	0.848		1.011	0.93764	0.862	0.28258	0.852	0.27782
Zm00001d003566_P001	26S proteasome non-ATPase regulatory subunit 11 homolog	48.344	1.038	1.019		0.784	0.843		0.801	0.844		0.791	0.024423	0.8	0.0150031	1.011	0.82382
Zm00001d023506_P002	calcineurin B-like7 GN= cbl7	25.707	0.891	1.187	1.168	1.052	1.016	1.026	1.029	0.85	0.803	0.953	0.71282	0.826	0.190396	0.867	0.188836
Zm00001d046552_P002	Charged multivesicular body protein 4b%3B Putative SNF domain containing family protein	29.847	0.663	0.619	0.541	1.247	1.493	1.479	1.237	1.1	1.116	2.314	0.00055688	1.894	0.00080009	0.818	0.04562
Zm00001d034896_P004	AKINbetagamma-1 protein kinase GN= akin1	55.027	1.004			0.998			0.91			0.994		0.906		0.912
Zm00001d044468_P004	maternal effect embryo arrest 18	47.383			0.899			0.964			0.822	1.072		0.914		0.853
Zm00001d037867_P002	uncharacterized protein	122.74		0.917			1.151			1.168		1.255		1.274		1.015
Zm00001d052260_P001	Probable galacturonosyltransferase 9	53.997	0.726	0.57	1.056	1.175	1.228	0.898	1.449	1.274	0.662	1.403	0.150843	1.439	0.31926	1.025	0.94412
Zm00001d034523_P002	Pheophorbide a oxygenase	33.619		0.841			1.004			0.965		1.194		1.147		0.961
Zm00001d027412_P037	dicer-like 101 mutant plants have 'fuzzy tassel' and reduced stature. GN= dcl101	89.647	1.171	1.099	1.338	0.899	1.053	0.862	0.961	0.957	0.788	0.78	0.041579	0.75	0.02998	0.962	0.68118
Zm00001d005910_P001	Probable carboxylesterase 2	34.851		0.959	1.022		1.098	0.922		1.142	1.246	1.02	0.87776	1.205	0.074536	1.182	0.22332
Zm00001d017811_P001	Pentatricopeptide repeat (PPR) superfamily protein	54.629	1.248	1.205	1.035	0.98	1.102	1.079	0.594	1.107	1.089	0.906	0.22804	0.8	0.29066	0.883	0.47878
Zm00001d020783_P006	Coatomer subunit zeta-2	19.793	1.361		0.827	0.776		0.91	1.105		0.96	0.771	0.4668	0.944	0.91934	1.225	0.195597
Zm00001d046442_P002	SOUL heme-binding family protein	40.965	0.669		0.53	1.256		1.291	1.136		1.339	2.124	0.022981	2.064	0.036256	0.972	0.73832
Zm00001d031412_P006	Glycerophosphodiester phosphodiesterase GDPDL3	75.902	0.381		0.273	0.331		0.328	0.62		0.343	1.008	0.91862	1.472	0.4029	1.461	0.45964
Zm00001d033223_P001	NagB/RpiA/CoA transferase-like superfamily protein	15.796	0.096		0.168			0.261			0.269	1.977		2.038		1.031
Zm00001d024755_P009	PTI1-like tyrosine-protein kinase 3	37.02	0.831	0.88	0.894	1.132	1.112	1.203	1.128	1.034	1.066	1.323	0.00100218	1.239	0.0031759	0.936	0.13264
Zm00001d017029_P007	phosphoinositide binding	110.91	0.366	0.393	0.394	0.881	0.931	0.911	1.12	1.104	1.245	2.362	3.8598e-06	3.009	1.82481e-05	1.274	0.0042441
Zm00001d022578_P001	Ubiquitin-activating enzyme E1 2	118.07	0.876	0.798	0.782	0.935	1.029	0.997	1.183	0.887	1.004	1.206	0.0139802	1.252	0.072883	1.038	0.7405
Zm00001d018423_P010	UDP-glucose:glycoprotein glucosyltransferase	177.11	1.035	1.069	1.115	0.935	0.985	0.891	1.098	1.143	1.139	0.873	0.019699	1.05	0.121962	1.202	0.0042833
Zm00001d008587_P001	Class I glutamine amidotransferase-like superfamily protein	48.523	0.898			0.984			1.247			1.096		1.389		1.267
Zm00001d032618_P001	Secretory protein	24.482	1.162	1.148	1.116	0.542	0.559	0.667	0.722	0.754	0.808	0.516	0.00053779	0.667	0.0003152	1.292	0.023224
Zm00001d011993_P002	50S ribosomal protein L27 chloroplastic	20.63	0.77	0.789	0.868	0.878	0.895	0.887	0.615	0.516	0.73	1.096	0.128343	0.767	0.061862	0.7	0.067197
Zm00001d029782_P010	Ubiquitin domain-containing protein DSK2b	50.996	0.793	0.871	0.857	0.613	0.79	0.894	0.805	0.987	0.779	0.911	0.41502	1.02	0.86068	1.119	0.4225
Zm00001d004438_P001	pullulanase-type starch debranching enzyme1 single copy, cDNA clone similar to rice sequence GN= zpu1	41.436	0.985			1.017			0.88			1.032		0.893		0.865
Zm00001d019856_P010	ENTH/VHS family protein	96.301			0.9			1.023			1.01	1.137		1.122		0.987
Zm00001d042287_P002	CDC5 protein	32.417	0.601			1.071			1.088			1.782		1.81		1.016
Zm00001d046553_P002	Fructose-bisphosphate aldolase 7 cytosolic	67.839	0.553	0.801		1.019	1.027		0.949	1.187		1.511	0.25908	1.578	0.163783	1.044	0.79778
Zm00001d041871_P001	ATP binding / calcium ion binding / calmodulin-dependent protein kinase/ kinase/ protein kinase/ protein serine/threonine kinase GN=AT4G04720 (E=5e-040) CPK21 | CPK21	29.061	0.247	0.158	0.282	1.006	1.081	0.985	1.249	1.163	1.199	4.472	0.00100277	5.256	0.0107556	1.175	0.0097384
Zm00001d033807_P001	Diacylglycerol kinase 5	18.256	1.116			1.129			0.815			1.012		0.73		0.722
Zm00001d041267_P003	Protein YIF1A	30.355	1.045		1.039	0.944		0.932	1.005		1.1	0.9	0.0044199	1.01	0.86058	1.122	0.129342
Zm00001d017092_P001	Elongation factor Tu	50.536	0.943	0.95	0.847	0.847	0.908	0.904	0.858	0.608	0.641	0.97	0.53826	0.769	0.073544	0.792	0.089641
Zm00001d034977_P001	VAMP protein SEC22	23.855	0.796	1.033	1.451	1.364	1.242	1.273	0.92	1.007	0.767	1.183	0.32516	0.821	0.41774	0.695	0.0120387
Zm00001d037104_P008	Adrenodoxin-like protein 2 mitochondrial	10.597	1.145	1.189	1.259	1.246	1.135	1.291	1.326	1.257	1.298	1.022	0.67924	1.08	0.070304	1.057	0.24378
Zm00001d003941_P004	Probable metal-nicotianamine transporter YSL6	72.332	1.123	0.678	0.935	0.913	0.992	1.499	0.922	1.132	0.865	1.244	0.369	1.067	0.66256	0.858	0.47688
Zm00001d019586_P027	glycosyl hydrolase family 10 protein / carbohydrate-binding domain-containing protein	60.087	0.75	0.75	1.224	0.803	1.056	1.262	0.784	1.08	1.074	1.146	0.52178	1.079	0.65848	0.941	0.76396
Zm00001d022622_P008	3-dehydroquinate synthase chloroplastic	45.212		1.103	1.07		1.195	0.947		1.089	0.985	0.986	0.8744	0.954	0.45842	0.968	0.8522
Zm00001d011348_P001	HXXXD-type acyl-transferase family protein	45.484	1.156	1.082	1.158	1.045	0.935	1.014	0.997	0.95	1.048	0.882	0.034116	0.882	0.025121	1	0.98926
Zm00001d002332_P026	NAD(P)-binding Rossmann-fold superfamily protein	31.72	0.649			1.062			1.037			1.636		1.598		0.976
Zm00001d001846_P001	Dolichyl-diphosphooligosaccharide--protein glycosyltransferase subunit STT3B	80.811			1.028			0.894			0.77	0.87		0.749		0.861
Zm00001d053663_P003	Fumarylacetoacetase	46.689	0.754	0.846	0.865	0.815	0.773	0.777	0.795	1.012	0.938	0.959	0.43246	1.114	0.27692	1.161	0.120045
Zm00001d020441_P004	O-fucosyltransferase family protein	55.755
Zm00001d032893_P001	Small heat shock-like protein	21.799	0.741	0.965	0.785	1.179	1.189	1.016	1.079	1.061	1.293	1.358	0.030936	1.378	0.034055	1.014	0.88208
Zm00001d042282_P003	Aldolase-type TIM barrel family protein	46.22	1.112	1.155	1.445	1.041	1.282	1.12	1.161	1.142	1.409	0.928	0.51832	1	0.9845	1.078	0.45958
Zm00001d022367_P001	Beta-glucosidase 44	58.436	0.844	0.943	1.056	0.74	0.675	0.821	0.639	0.615	0.697	0.786	0.049639	0.686	0.007419	0.873	0.117461
Zm00001d038857_P001	Chaperonin CPN60-like 2 mitochondrial	61.264	1.115	1.138	1.119	1.055	0.944	0.957	0.911	0.989	0.933	0.877	0.020184	0.84	0.0022756	0.958	0.38208
Zm00001d049718_P004	Protein transporter%3B Putative VHS/GAT domain containing family protein isoform 1%3B Putative VHS/GAT domain containing family protein isoform 2	38.213	0.681			0.977			0.997			1.435		1.464		1.02
Zm00001d015985_P001	Probable tocopherol cyclase%2C chloroplastic	43.301			0.805			1.076			1.324	1.337		1.645		1.23
Zm00001d047632_P002	Phytochrome	109.01		0.86	1.054		0.976	1.222		0.99	0.99	1.148	0.4609	1.034	0.7379	0.901	0.4746
Zm00001d019093_P001	Small GTP-binding protein	14.317	0.686	0.739	0.812	0.938	0.855	1.142	1.024	0.871	0.936	1.312	0.053438	1.266	0.02522	0.965	0.76686
Zm00001d005127_P024	E3 ubiquitin-protein ligase UPL1	98.31	0.977			0.933			1.226			0.955		1.255		1.314
Zm00001d028477_P003	Chorismate synthase chloroplastic	47.069	1.036	0.844	0.918	1	1.012	1.041	1.074	1.003	0.993	1.091	0.2095	1.097	0.21132	1.006	0.86168
Zm00001d029973_P002	Nucleic acid binding protein	46.651	0.523	0.787	0.708	0.493	1.068	1.1	1.221	1.16	0.939	1.319	0.4738	1.645	0.025938	1.248	0.37026
Zm00001d006348_P001	growth-regulating factor 9	28.637			2.376			1.1			0.528	0.463		0.222		0.48
Zm00001d020236_P001	uncharacterized protein	14.414	1.143	1.357	1.265	0.858	0.944	0.914	0.745	0.573	0.97	0.721	0.0047363	0.608	0.031596	0.842	0.27838
Zm00001d024523_P030	Ramosa 1 enhancer locus 2%3B Ramosa1 enhancer locus2	98.547	1.401	1.069	1.034	1.016	0.951	1.101	1.042	0.988	1.077	0.876	0.2995	0.887	0.32532	1.013	0.79318
Zm00001d038808_P009	Vesicle-fusing ATPase	81.317	1.087	1.09	1.1	0.936	0.915	0.961	1.022	0.965	1.045	0.858	0.00046435	0.925	0.082557	1.078	0.053385
Zm00001d015992_P004	uncharacterized protein	78.611		0.928	0.871		0.869	0.899		1.094	1.14	0.983	0.6825	1.242	0.029062	1.264	0.0127648
Zm00001d014183_P009	Probable prolyl 4-hydroxylase 12	32.87	0.512			0.916			1.134			1.789		2.215		1.238
Zm00001d034562_P003	Calcium-dependent protein kinase 2	41.814	1.184	1.294	1.071	1.181	1.533	1.122	1.154	1.229	0.938	1.081	0.5564	0.936	0.5158	0.866	0.32718
Zm00001d008210_P006	Germin-like protein subfamily 2 member 1	19.37	0.957	1.043	1.267	1.924	1.393	2.011	1.53	1.556	1.431	1.631	0.027444	1.383	0.0190437	0.848	0.26652
Zm00001d010588_P001	pyruvate decarboxylase1 cDNA and genomic clone, SSR UMC1163 GN= pdc1	70.279		0.324	0.145		1.241	1.304		0.946	1.152	5.426	0.048096	4.473	0.062859	0.824	0.191017
Zm00001d004154_P001	Cleavage and polyadenylation specificity factor subunit 1	128.99	1.462	1.114	1.223	0.876	0.887	0.915	0.845	0.779	0.818	0.705	0.0131572	0.643	0.0063351	0.912	0.026357
Zm00001d021954_P005	Putative MO25-like protein	37.756	1.18	1.139	1.045	0.916	1.015	0.956	1.043	0.953	0.835	0.858	0.03106	0.842	0.076804	0.981	0.76418
Zm00001d043047_P001	Expansin-A2	26.423	1.538	1.109	1.384	0.983	1.564	1.147	0.804	1.269	0.853	0.916	0.59196	0.726	0.126363	0.792	0.30012
Zm00001d010512_P002	ARM repeat superfamily protein	92.781		0.639			1.147			1.021		1.795		1.598		0.89
Zm00001d014722_P001	Glycosyltransferase	55.864			0.808			1.137			0.976	1.407		1.208		0.858
Zm00001d034350_P003	IAP-like protein 1	92.688	1.201			1.004			1.146			0.836		0.954		1.141
Zm00001d011833_P001	Ferredoxin--NADP reductase leaf isozyme 1 chloroplastic	40.689	0.977	0.983	1.112	1.088	1.068	1.065	1.161	1.009	0.914	1.049	0.36888	1.004	0.99208	0.957	0.56036
Zm00001d021587_P002	Protein FLX-like 1	38.647	0.617	1.079	0.741	1.171	1.495	1.485	1.202	1.138	1.092	1.703	0.038925	1.408	0.091279	0.827	0.095483
Zm00001d043185_P001	Has 35333 Blast hits to 34131 proteins in 2444 species Archae - 798 GN=BEST Arabidopsis thaliana protein match is: mucin-related (TAIR:AT2G02880.1)	40.966	0.853	0.564	0.802	1.115	1.116	1.065	1.124	0.94	1.103	1.485	0.086799	1.427	0.058977	0.961	0.50642
Zm00001d032311_P009	trehalose-6-phosphate synthase4 GN= trps4	97.891	1.002			1.108			1.133			1.106		1.131		1.023
Zm00001d046533_P008	nucleoporin-related	25.987		0.775	0.859		1.108	1.178		1.024	0.969	1.399	0.030218	1.22	0.075983	0.872	0.079803
Zm00001d050191_P004	Ubiquitin-specific protease family C19-related protein	51.124	1.44			1.005			0.813			0.698		0.565		0.809
Zm00001d035086_P002	Polyadenylate-binding protein-interacting protein 10	17.194			0.93			0.97			0.966	1.043		1.039		0.996
Zm00001d052368_P001	protein GN=Expressed protein	77.187			0.336			1.046			1.217	3.113		3.622		1.163
Zm00001d019515_P003	PTI1-like tyrosine-protein kinase 3	40.782	0.834	1.107	1.133	0.978	0.936	1.011	0.969	0.781	0.898	0.952	0.70676	0.861	0.28654	0.905	0.199179
Zm00001d052289_P001	pyruvate dehydrogenase1 cDNA, SSR umc1466 GN= pdh1	42.75	1.273	1.162	1.076	0.937	1.01	1.001	0.935	0.959	0.932	0.84	0.032885	0.805	0.012202	0.959	0.174218
Zm00001d028375_P002	B-cell receptor-associated 31-like	14.79	0.613	0.299		1.055	1.16		1.192	1.39		2.429	0.119875	2.831	0.095537	1.166	0.23542
Zm00001d006184_P001	uncharacterized protein	29.578			0.558			0.63			0.599	1.129		1.073		0.951
Zm00001d035666_P003	Replication protein A 70 kDa DNA-binding subunit E	12.019	1.071	1.057	1.198	1.077	0.997	1.03	1.195	0.957	0.994	0.933	0.21022	0.946	0.49916	1.014	0.90522
[truncated: 6,473 more rows]
