# Supplementary material for: Comparative Proteomic Analysis of the Defense Response to Gibberella Stalk Rot in Maize and Reveals That ZmWRKY83 Is Involved in Plant Disease Resistance
Source: Front Plant Sci. 2021 Aug 13;12:694973. doi: 10.3389/fpls.2021.694973 (PMC8417113; doi:10.3389/fpls.2021.694973)
Supplement: Supplementary Table 2 — The list of DEPs induced by F. graminearum infection at 0, 1, and 2 dpi in maize stem. [file Table_2.xlsx]

## Sheet: 1dpi vs 0dpi 
Protein accession	Protein description	1 dpi/0 dpi Ratio	Regulated Type	1 dpi/0 dpi P value	Subcellular localization	KEGG KO No.	KEGG Gene	KEGG pathway	IPR ID	Domain description
Zm00001d051591_P001	histone 2B5 cDNA from unfertilized maize ovule, similar to histone 2B, distinct from previous sequences reported GN= his2b5	16.088	Up	9.7781e-05	nucleus	K11252			IPR009072; IPR007125;	Histone-fold; Histone H2A/H2B/H3;
Zm00001d050100_P001	Histone H2B.2	13.032	Up	0.00036362	nucleus	K11252			IPR009072; IPR007125;	Histone-fold; Histone H2A/H2B/H3;
Zm00001d021362_P001	growth-regulating factor 9	7.089	Up	0.0119223	nucleus				IPR014978; IPR014977;	Glutamine-Leucine-Glutamine, QLQ; WRC domain;
Zm00001d007810_P003	40S ribosomal protein S15-4	6.451	Up	0.0056402	cytoplasm	K02958	RP-S15e; small subunit ribosomal protein S15e	zma03010 Ribosome - Zea mays (maize);	IPR023575;	Ribosomal protein S19, superfamily;
Zm00001d026278_P001	Whole genome shotgun sequence of line PN40024 scaffold_11.assembly12x (Fragment)	6.363	Up	0.0042397	nucleus
Zm00001d034638_P003	ras-related protein ARA-3 GN= ara3	6.17	Up	0.0148959	cytoplasm	K07901	RAB8A; Ras-related protein Rab-8A	zma04144 Endocytosis - Zea mays (maize);	IPR005225; IPR027417;	Small GTP-binding protein domain; P-loop containing nucleoside triphosphate hydrolase;
Zm00001d047453_P003	Villin-2	5.774	Up	0.00112387	nucleus				IPR003128; IPR029006; IPR007123;	Villin headpiece; ADF-H/Gelsolin-like domain; Gelsolin-like domain;
Zm00001d040697_P001	S-adenosylmethionine synthase 1	5.689	Up	0.007382	cytoplasm	K00789	metK; S-adenosylmethionine synthetase [EC:2.5.1.6]	zma01230 Biosynthesis of amino acids - Zea mays (maize); zma01110 Biosynthesis of secondary metabolites - Zea mays (maize); zma01100 Metabolic pathways - Zea mays (maize); zma00270 Cysteine and methionine metabolism - Zea mays (maize);	IPR022636; IPR022628; IPR022629; IPR022630;	S-adenosylmethionine synthetase superfamily; S-adenosylmethionine synthetase, N-terminal; S-adenosylmethionine synthetase, central domain; S-adenosylmethionine synthetase, C-terminal;
Zm00001d019920_P009	Protein SMG7	5.626	Up	0.000119271	chloroplast	K14409	SMG7; protein SMG7	zma03015 mRNA surveillance pathway - Zea mays (maize);	IPR011990; IPR018834;	Tetratricopeptide-like helical domain; DNA/RNA-binding domain, Est1-type;
Zm00001d010588_P001	pyruvate decarboxylase1 cDNA and genomic clone, SSR UMC1163 GN= pdc1	5.426	Up	0.048096	chloroplast	K01568	PDC; pyruvate decarboxylase [EC:4.1.1.1]	zma00010 Glycolysis / Gluconeogenesis - Zea mays (maize); zma01110 Biosynthesis of secondary metabolites - Zea mays (maize); zma01100 Metabolic pathways - Zea mays (maize);	IPR012000; IPR029035; IPR029061; IPR011766; IPR012001;	Thiamine pyrophosphate enzyme, central domain; DHS-like NAD/FAD-binding domain; Thiamin diphosphate-binding fold; Thiamine pyrophosphate enzyme, C-terminal TPP-binding; Thiamine pyrophosphate enzyme, N-terminal TPP-binding domain;
Zm00001d052336_P001	Peroxidase 67	5.41	Up	0.00031641	chloroplast	K00430	E1.11.1.7; peroxidase [EC:1.11.1.7]	zma00940 Phenylpropanoid biosynthesis - Zea mays (maize); zma01110 Biosynthesis of secondary metabolites - Zea mays (maize); zma01100 Metabolic pathways - Zea mays (maize);	IPR033905; IPR002016;	Secretory peroxidase; Haem peroxidase, plant/fungal/bacterial;
Zm00001d017279_P001	phenylalanine ammonia lyase7 GN= pal7	5.368	Up	0.00020354	chloroplast	K10775	PAL; phenylalanine ammonia-lyase [EC:4.3.1.24]	zma00940 Phenylpropanoid biosynthesis - Zea mays (maize); zma01110 Biosynthesis of secondary metabolites - Zea mays (maize); zma01100 Metabolic pathways - Zea mays (maize); zma00360 Phenylalanine metabolism - Zea mays (maize);	IPR024083; IPR008948; IPR023144;	Fumarase/histidase, N-terminal; L-Aspartase-like; Phenylalanine ammonia-lyase, shielding domain;
Zm00001d013683_P002	DNA-directed RNA polymerase II subunit 2	5.167	Up	0.034924	cytoplasm	K03010	RPB2; DNA-directed RNA polymerase II subunit RPB2 [EC:2.7.7.6]	zma00240 Pyrimidine metabolism - Zea mays (maize); zma01100 Metabolic pathways - Zea mays (maize); zma03020 RNA polymerase - Zea mays (maize); zma00230 Purine metabolism - Zea mays (maize);	IPR007120; IPR014724; IPR007641; IPR007647;	DNA-directed RNA polymerase, subunit 2, domain 6; RNA polymerase Rpb2, OB-fold; RNA polymerase Rpb2, domain 7; RNA polymerase Rpb2, domain 5;
Zm00001d011713_P008	Myosin family protein with Dil domain	5.02	Up	3.6419e-05	cytoplasm	K10357			IPR002710; IPR001609; IPR027417;	Dilute domain; Myosin head, motor domain; P-loop containing nucleoside triphosphate hydrolase;
Zm00001d033483_P001	dehydrin13 GN= dhn13	5.009	Up	0.0097565	nucleus
Zm00001d026680_P006	Soluble inorganic pyrophosphatase 1	4.884	Up	1.88501e-05	cytoplasm	K01507	ppa; inorganic pyrophosphatase [EC:3.6.1.1]	zma00190 Oxidative phosphorylation - Zea mays (maize);
Zm00001d039883_P001	Mitochondrial glycoprotein family protein	4.877	Up	0.000142183	chloroplast	K15414
Zm00001d038703_P001	O-methyltransferase ZRP4	4.749	Up	2.3153e-05	cytoplasm				IPR011991; IPR012967; IPR029063; IPR001077;	Winged helix-turn-helix DNA-binding domain; Plant methyltransferase dimerisation; S-adenosyl-L-methionine-dependent methyltransferase; O-methyltransferase, family 2;
Zm00001d002490_P001	Plastid-specific 30S ribosomal protein 2	4.668	Up	0.0100815	chloroplast				IPR000504; IPR012677;	RNA recognition motif domain; Nucleotide-binding alpha-beta plait domain;
Zm00001d013923_P001	Pentatricopeptide repeat-containing protein mitochondrial	4.474	Up	5.5192e-05	chloroplast				IPR011990;	Tetratricopeptide-like helical domain;
Zm00001d041871_P001	ATP binding / calcium ion binding / calmodulin-dependent protein kinase/ kinase/ protein kinase/ protein serine/threonine kinase GN=AT4G04720 (E=5e-040) CPK21 | CPK21	4.472	Up	0.00100277	nucleus	K13412	CPK; calcium-dependent protein kinase [EC:2.7.11.1]	zma04626 Plant-pathogen interaction - Zea mays (maize);	IPR011992; IPR002048; IPR011009;	EF-hand domain pair; EF-hand domain; Protein kinase-like domain;
Zm00001d001808_P001	Has 475 Blast hits to 467 proteins in 210 species Archae - 0 GN=CONTAINS InterPro DOMAIN/s: Bystin (InterPro:IPR007955)	4.454	Up	0.0022209	cytoplasm	K14797
Zm00001d024853_P001	1-aminocyclopropane-1-carboxylate oxidase15 GN= acco15	4.436	Up	0.046724	chloroplast	K05933	E1.14.17.4; aminocyclopropanecarboxylate oxidase [EC:1.14.17.4]	zma01110 Biosynthesis of secondary metabolites - Zea mays (maize); zma01100 Metabolic pathways - Zea mays (maize); zma00270 Cysteine and methionine metabolism - Zea mays (maize);	IPR005123; IPR027443; IPR026992;	Oxoglutarate/iron-dependent dioxygenase; Isopenicillin N synthase-like; Non-haem dioxygenase N-terminal domain;
Zm00001d039821_P001	Histone H2B	4.417	Up	0.00038188	nucleus	K11252			IPR009072; IPR007125;	Histone-fold; Histone H2A/H2B/H3;
Zm00001d021579_P007	Filament-like plant protein 3	4.407	Up	0.0073781	chloroplast
Zm00001d005789_P001	histone 2B3 genomic sequence selected with his2B cDNA probe GN= his2b3	4.402	Up	0.0040367	nucleus	K11252			IPR009072; IPR007125;	Histone-fold; Histone H2A/H2B/H3;
Zm00001d025413_P001	40S ribosomal protein S10-1	4.354	Up	0.0056797	nucleus	K02947	RP-S10e; small subunit ribosomal protein S10e	zma03010 Ribosome - Zea mays (maize);	IPR005326;	Plectin/S10, N-terminal;
Zm00001d050696_P005	Cytochrome b-c1 complex subunit 6	4.288	Up	0.00046259	chloroplast	K00416	QCR6; ubiquinol-cytochrome c reductase subunit 6	zma00190 Oxidative phosphorylation - Zea mays (maize); zma01100 Metabolic pathways - Zea mays (maize);	IPR023184;	Ubiquinol-cytochrome C reductase hinge domain;
Zm00001d041480_P001	DEAD-box ATP-dependent RNA helicase 53	4.231	Up	0.00075727	mitochondria				IPR014014; IPR011545; IPR027417; IPR014001; IPR001650;	RNA helicase, DEAD-box type, Q motif; DEAD/DEAH box helicase domain; P-loop containing nucleoside triphosphate hydrolase; Helicase superfamily 1/2, ATP-binding domain; Helicase, C-terminal;
Zm00001d032739_P009	Heterogeneous nuclear ribonucleoprotein 1	4.181	Up	0.00052292	nucleus	K14411	MSI; RNA-binding protein Musashi	zma03015 mRNA surveillance pathway - Zea mays (maize);	IPR034131; IPR000504; IPR012677;	DAZ-associated protein 1, RNA recognition motif 2; RNA recognition motif domain; Nucleotide-binding alpha-beta plait domain;
Zm00001d004022_P004	RPM1-interacting protein 4	4.163	Up	0.00037506	nucleus	K13456	RIN4; RPM1-interacting protein 4	zma04626 Plant-pathogen interaction - Zea mays (maize);	IPR008700;	RIN4, pathogenic type III effector avirulence factor Avr cleavage site;
Zm00001d051420_P001	dehydrin3 GN= dhn3	4.162	Up	0.0074557	nucleus
Zm00001d027667_P012	citrate transporter1 GN= citt1	4.16	Up	0.00144375	plasma membrane				IPR004680;	Citrate transporter-like domain;
Zm00001d001959_P002	GTP cyclohydrolase I 1	4.102	Up	0.00020292	cytoplasm	K01495	GCH1; GTP cyclohydrolase IA [EC:3.5.4.16]	zma00790 Folate biosynthesis - Zea mays (maize); zma01100 Metabolic pathways - Zea mays (maize);	IPR020602;	GTP cyclohydrolase I domain;
Zm00001d018061_P001	Shikimate kinase	4.084	Up	0.00130428	chloroplast	K00891	E2.7.1.71; shikimate kinase [EC:2.7.1.71]	zma01230 Biosynthesis of amino acids - Zea mays (maize); zma01110 Biosynthesis of secondary metabolites - Zea mays (maize); zma01100 Metabolic pathways - Zea mays (maize); zma00400 Phenylalanine, tyrosine and tryptophan biosynthesis - Zea mays (maize);	IPR027417;	P-loop containing nucleoside triphosphate hydrolase;
Zm00001d047054_P001	Pyruvate kinase	4.052	Up	0.0031802	chloroplast	K00873	PK; pyruvate kinase [EC:2.7.1.40]	zma00010 Glycolysis / Gluconeogenesis - Zea mays (maize); zma01230 Biosynthesis of amino acids - Zea mays (maize); zma01200 Carbon metabolism - Zea mays (maize); zma01110 Biosynthesis of secondary metabolites - Zea mays (maize); zma01100 Metabolic pathways - Zea mays (maize); zma00230 Purine metabolism - Zea mays (maize); zma00620 Pyruvate metabolism - Zea mays (maize);	IPR011037; IPR015813; IPR015794; IPR015806; IPR015795; IPR015793;	Pyruvate kinase-like, insert domain; Pyruvate/Phosphoenolpyruvate kinase-like domain; Pyruvate kinase, alpha/beta; Pyruvate kinase, beta-barrel insert domain; Pyruvate kinase, C-terminal; Pyruvate kinase, barrel;
Zm00001d012322_P002	cytochrome P450 family 81 subfamily D polypeptide 8	4.035	Up	0.0058579	chloroplast
Zm00001d022459_P001	uncharacterized protein	4.033	Up	0.048281	chloroplast
Zm00001d040468_P001	major facilitator superfamily defense1 Defense-inducible protein related to integral membrane permeases and bacterial antiporters GN= mfsd1	3.984	Up	0.031304	vacuolar membrane				IPR020846;	Major facilitator superfamily domain;
Zm00001d011121_P002	Ribosomal RNA processing Brix domain protein	3.919	Up	5.7535e-05	cytoplasm	K14846			IPR007109; IPR004154;	Brix domain; Anticodon-binding;
Zm00001d012244_P001	Ubiquitin-like domain-containing CTD phosphatase	3.899	Up	0.0070631	cytoplasm	K17618			IPR029071; IPR000626; IPR011943; IPR004274; IPR023214;	Ubiquitin-related domain; Ubiquitin domain; HAD-superfamily hydrolase, subfamily IIID; FCP1 homology domain; HAD-like domain;
Zm00001d003188_P001	Endochitinase EP3	3.871	Up	0.019045	chloroplast	K01183	E3.2.1.14; chitinase [EC:3.2.1.14]	zma00520 Amino sugar and nucleotide sugar metabolism - Zea mays (maize); zma01100 Metabolic pathways - Zea mays (maize);	IPR023346; IPR000726; IPR001002;	Lysozyme-like domain; Glycoside hydrolase, family 19, catalytic; Chitin-binding, type 1;
Zm00001d011838_P001	Glycosyltransferase family 61 protein	3.867	Up	0.029257	cytoplasm
Zm00001d029969_P001	nucleoside diphosphate kinase1 encodes a G4-binding protein GN= ndpk1	3.824	Up	0.0017777	chloroplast
Zm00001d039613_P001	Has 43784 Blast hits to 26928 proteins in 1799 species Archae - 86 GN=BEST Arabidopsis thaliana protein match is: copper ion binding (TAIR:AT4G32610.1)	3.774	Up	0.0064232	nucleus
Zm00001d044925_P001	CP12-1	3.774	Up	0.032457	chloroplast				IPR003823;	Domain of unknown function CP12;
Zm00001d008788_P004	Eukaryotic translation initiation factor 3 subunit A	3.718	Up	0.0050191	cytoplasm	K03254	EIF3A; translation initiation factor 3 subunit A	zma03013 RNA transport - Zea mays (maize);	IPR000717;	Proteasome component (PCI) domain;
Zm00001d013568_P001	Glycine-rich RNA-binding%2C abscisic acid-inducible protein	3.645	Up	3.2522e-07	nucleus				IPR000504; IPR012677;	RNA recognition motif domain; Nucleotide-binding alpha-beta plait domain;
Zm00001d032250_P001	uncharacterized protein	3.621	Up	2.405e-05	plasma membrane
Zm00001d002847_P001	(+)-neomenthol dehydrogenase	3.62	Up	0.0048005	cytoplasm	K15095	E1.1.1.208; (+)-neomenthol dehydrogenase [EC:1.1.1.208]	zma01110 Biosynthesis of secondary metabolites - Zea mays (maize); zma00902 Monoterpenoid biosynthesis - Zea mays (maize);	IPR016040;	NAD(P)-binding domain;
Zm00001d041255_P001	translation initiation factor 3 (IF-3) family protein	3.597	Up	0.037802	chloroplast	K02520			IPR019814; IPR019815;	Translation initiation factor 3, N-terminal; Translation initiation factor 3, C-terminal;
Zm00001d018438_P002	Ypt/Rab-GAP domain of gyp1p superfamily protein	3.577	Up	0.0034607	nucleus				IPR000195;	Rab-GTPase-TBC domain;
Zm00001d013375_P006	Lariat debranching enzyme	3.574	Up	0.00036495	cytoplasm	K18328			IPR029052; IPR004843;	Metallo-dependent phosphatase-like; Calcineurin-like phosphoesterase domain, ApaH type;
Zm00001d018868_P001	uncharacterized protein	3.574	Up	0.002805	nucleus
Zm00001d045566_P003	Cell division control protein 48 homolog C	3.571	Up	0.036337	chloroplast	K14571	RIX7; ribosome biogenesis ATPase	zma03008 Ribosome biogenesis in eukaryotes - Zea mays (maize);	IPR003593; IPR003959; IPR027417;	AAA+ ATPase domain; ATPase, AAA-type, core; P-loop containing nucleoside triphosphate hydrolase;
Zm00001d016285_P001	Protein kinase family protein with leucine-rich repeat domain	3.552	Up	0.0036827	plasma membrane				IPR000719; IPR013210; IPR032675; IPR013320; IPR011009;	Protein kinase domain; Leucine-rich repeat-containing N-terminal, plant-type; Leucine-rich repeat domain, L domain-like; Concanavalin A-like lectin/glucanase domain; Protein kinase-like domain;
Zm00001d037026_P001	uncharacterized protein	3.551	Up	0.0029975	nucleus
Zm00001d009118_P001	Adenine nucleotide alpha hydrolases-like superfamily protein	3.531	Up	0.00095764	cytoplasm				IPR014729; IPR006016;	Rossmann-like alpha/beta/alpha sandwich fold; UspA;
Zm00001d008759_P001	Has 43784 Blast hits to 26928 proteins in 1799 species Archae - 86 GN=BEST Arabidopsis thaliana protein match is: copper ion binding (TAIR:AT4G32610.1)	3.514	Up	0.00020302	nucleus
Zm00001d036406_P001	Novel plant SNARE 11	3.447	Up	6.0699e-05	nucleus	K08494
Zm00001d048424_P017	evolutionarily conserved C-terminal region 2	3.446	Up	0.0187849	nucleus				IPR007275;	YTH domain;
Zm00001d053554_P001	Peroxidase 52	3.434	Up	0.00036195	chloroplast	K00430	E1.11.1.7; peroxidase [EC:1.11.1.7]	zma00940 Phenylpropanoid biosynthesis - Zea mays (maize); zma01110 Biosynthesis of secondary metabolites - Zea mays (maize); zma01100 Metabolic pathways - Zea mays (maize);	IPR033905; IPR002016;	Secretory peroxidase; Haem peroxidase, plant/fungal/bacterial;
Zm00001d032531_P001	Membrane steroid-binding protein 1	3.406	Up	0.0253	cytoplasm	K17278			IPR001199;	Cytochrome b5-like heme/steroid binding domain;
Zm00001d025401_P001	abscisic acid stress ripening5 GN= aasr5	3.361	Up	0.0053835	mitochondria
Zm00001d037934_P005	UDP-glucuronic acid decarboxylase 4	3.36	Up	0.000100924	chloroplast	K08678	UXS1; UDP-glucuronate decarboxylase [EC:4.1.1.35]	zma00520 Amino sugar and nucleotide sugar metabolism - Zea mays (maize); zma01100 Metabolic pathways - Zea mays (maize);	IPR016040;	NAD(P)-binding domain;
Zm00001d003698_P001	CBS domain-containing protein CBSCBSPB2	3.36	Up	1.2157e-07	cytoplasm				IPR000644;	CBS domain;
Zm00001d035480_P001	Cytochrome P450 78A7	3.348	Up	0.0071234	cytoplasm
Zm00001d019263_P002	phosphoprotein phosphatase inhibitors	3.345	Up	0.020997	nucleus	K16833
Zm00001d002292_P002	NAD(P)-binding Rossmann-fold superfamily protein	3.302	Up	2.1337e-07	chloroplast	K12448	UXE; UDP-arabinose 4-epimerase [EC:5.1.3.5]	zma00520 Amino sugar and nucleotide sugar metabolism - Zea mays (maize); zma01100 Metabolic pathways - Zea mays (maize);	IPR016040;	NAD(P)-binding domain;
Zm00001d024752_P001	Peroxidase 64	3.261	Up	0.0132435	extracellular	K00430	E1.11.1.7; peroxidase [EC:1.11.1.7]	zma00940 Phenylpropanoid biosynthesis - Zea mays (maize); zma01110 Biosynthesis of secondary metabolites - Zea mays (maize); zma01100 Metabolic pathways - Zea mays (maize);	IPR033905; IPR002016;	Secretory peroxidase; Haem peroxidase, plant/fungal/bacterial;
Zm00001d031570_P003	FK506-binding protein 2-1	3.247	Up	0.045855	nucleus
Zm00001d011103_P001	copper ion binding	3.224	Up	0.036037	mitochondria
Zm00001d046234_P002	Inositol oxygenase 2	3.213	Up	2.0242e-05	cytoplasm	K00469	MIOX; inositol oxygenase [EC:1.13.99.1]	zma00053 Ascorbate and aldarate metabolism - Zea mays (maize); zma00562 Inositol phosphate metabolism - Zea mays (maize);
Zm00001d017850_P001	60S ribosomal protein L31	3.172	Up	0.0186557	cytoplasm	K02910	RP-L31e; large subunit ribosomal protein L31e	zma03010 Ribosome - Zea mays (maize);	IPR023621;	Ribosomal protein L31e domain;
Zm00001d017547_P001	Dehydrin COR410	3.147	Up	9.6766e-05	nucleus
Zm00001d044815_P001	Protein BOBBER 1	3.144	Up	0.012984	cytoplasm				IPR007052; IPR008978;	CS domain; HSP20-like chaperone;
Zm00001d046005_P001	Glycosyltransferase family 61 protein	3.13	Up	0.00023591	cytoplasm
Zm00001d021309_P015	Transcription initiation factor IIB-2	3.126	Up	0.022162	cytoplasm	K03124	TFIIB; transcription initiation factor TFIIB	zma03022 Basal transcription factors - Zea mays (maize);	IPR013150; IPR013137; IPR013763;	Transcription factor TFIIB, cyclin-like domain; Zinc finger, TFIIB-type; Cyclin-like;
Zm00001d034590_P002	Mitochondrial Rho GTPase 1	3.122	Up	0.00051921	chloroplast	K07870			IPR013566; IPR011992; IPR027417; IPR002048; IPR013567; IPR020860;	EF hand associated, type-1; EF-hand domain pair; P-loop containing nucleoside triphosphate hydrolase; EF-hand domain; EF hand associated, type-2; MIRO domain;
Zm00001d050121_P001	uncharacterized protein	3.12	Up	0.027057	chloroplast
Zm00001d046004_P003	HGA4	3.116	Up	0.0134843	peroxisome
Zm00001d048087_P001	Flavone 3'-O-methyltransferase 1	3.11	Up	0.0027557	cytoplasm	K22440			IPR011991; IPR012967; IPR029063; IPR001077;	Winged helix-turn-helix DNA-binding domain; Plant methyltransferase dimerisation; S-adenosyl-L-methionine-dependent methyltransferase; O-methyltransferase, family 2;
Zm00001d049984_P001	uncharacterized protein	3.08	Up	0.020025	nucleus
Zm00001d046318_P001	Putative FAD-binding Berberine family protein	3.072	Up	1.67775e-05	chloroplast	K22395	cinnamyl-alcohol dehydrogenase [EC:1.1.1.195]	zma00940 Phenylpropanoid biosynthesis - Zea mays (maize); zma01110 Biosynthesis of secondary metabolites - Zea mays (maize); zma01100 Metabolic pathways - Zea mays (maize);	IPR016166; IPR016169; IPR012951; IPR016167; IPR006094;	FAD-binding, type 2; CO dehydrogenase flavoprotein-like, FAD-binding, subdomain 2; Berberine/berberine-like; FAD-binding, type 2, subdomain 1; FAD linked oxidase, N-terminal;
Zm00001d026291_P005	DNA methyl transferase2 GN= met2	3.065	Up	0.00030009	chloroplast	K00558	DNMT1; DNA (cytosine-5)-methyltransferase 1 [EC:2.1.1.37]	zma01100 Metabolic pathways - Zea mays (maize); zma00270 Cysteine and methionine metabolism - Zea mays (maize);	IPR023780; IPR029063; IPR016197; IPR000953;	Chromo domain; S-adenosyl-L-methionine-dependent methyltransferase; Chromo domain-like; Chromo/chromo shadow domain;
Zm00001d029583_P001	Polygalacturonase inhibitor 1	3.061	Up	0.00154059	chloroplast				IPR013210; IPR032675;	Leucine-rich repeat-containing N-terminal, plant-type; Leucine-rich repeat domain, L domain-like;
Zm00001d002016_P001	Os07g0120600 protein	3.059	Up	0.039363	cytoplasm
Zm00001d051934_P001	5-pentadecatrienyl resorcinol O-methyltransferase	3.05	Up	0.0140602	cytoplasm				IPR011991; IPR029063; IPR001077;	Winged helix-turn-helix DNA-binding domain; S-adenosyl-L-methionine-dependent methyltransferase; O-methyltransferase, family 2;
Zm00001d021764_P007	Protein THYLAKOID FORMATION 1 chloroplastic	3.018	Up	0.0149837	nucleus
Zm00001d011113_P001	Uncharacterised protein family SERF	3.015	Up	0.0046183	chloroplast
Zm00001d041072_P001	ABC transporter F family member 1	3	Up	0.0096445	chloroplast	K06185			IPR032781; IPR003593; IPR003439; IPR027417;	ABC-transporter extension domain; AAA+ ATPase domain; ABC transporter-like; P-loop containing nucleoside triphosphate hydrolase;
Zm00001d041833_P007	tRNA pseudouridine synthase	2.989	Up	0.00157883	cytoplasm	K06173			IPR020103; IPR020097; IPR020095;	Pseudouridine synthase, catalytic domain; Pseudouridine synthase I, TruA, alpha/beta domain; Pseudouridine synthase I, TruA, C-terminal;
Zm00001d033648_P001	Organic anion transporter	2.988	Up	0.027582	chloroplast				IPR004853;	Sugar phosphate transporter domain;
Zm00001d041568_P001	60S ribosomal protein L2	2.979	Up	0.00049774	cytoplasm	K02938	RP-L8e; large subunit ribosomal protein L8e	zma03010 Ribosome - Zea mays (maize);	IPR008991; IPR012340; IPR022669; IPR022666; IPR014726; IPR014722;	Translation protein SH3-like domain; Nucleic acid-binding, OB-fold; Ribosomal protein L2, C-terminal; Ribosomal Proteins L2, RNA binding domain; Ribosomal protein L2, domain 3; Ribosomal protein L2 domain 2;
Zm00001d042585_P005	Protein root UVB sensitive 6	2.947	Up	0.0133757	nucleus
Zm00001d016440_P001	DNAJ heat shock family protein	2.936	Up	0.011758	cytoplasm	K09510			IPR008971; IPR002939; IPR001623;	HSP40/DnaJ peptide-binding; Chaperone DnaJ, C-terminal; DnaJ domain;
Zm00001d025981_P021	RNA-binding (RRM/RBD/RNP motifs) family protein	2.925	Up	0.0055185	nucleus
Zm00001d043998_P006	Ubiquitin-conjugating enzyme E2 8	2.919	Up	0.0187987	nucleus	K06689	UBE2D; ubiquitin-conjugating enzyme E2 D [EC:2.3.2.23]	zma04120 Ubiquitin mediated proteolysis - Zea mays (maize); zma04141 Protein processing in endoplasmic reticulum - Zea mays (maize);	IPR016135; IPR000608;	Ubiquitin-conjugating enzyme/RWD-like; Ubiquitin-conjugating enzyme E2;
Zm00001d018798_P006	IAP-like protein 1	2.899	Up	3.0007e-06	nucleus				IPR012935;	Zinc finger, C3HC-like;
Zm00001d031300_P003	Probable galactinol--sucrose galactosyltransferase 1	2.87	Up	0.00060465	chloroplast	K06617	E2.4.1.82; raffinose synthase [EC:2.4.1.82]	zma00052 Galactose metabolism - Zea mays (maize);	IPR013785; IPR017853;	Aldolase-type TIM barrel; Glycoside hydrolase superfamily;
Zm00001d045072_P023	uncharacterized protein	2.869	Up	0.000138639	nucleus
Zm00001d041082_P002	kaurene synthase4 GN= ks4	2.853	Up	0.00023834	chloroplast	K04121	E4.2.3.19; ent-kaurene synthase [EC:4.2.3.19]	zma00904 Diterpenoid biosynthesis - Zea mays (maize); zma01110 Biosynthesis of secondary metabolites - Zea mays (maize); zma01100 Metabolic pathways - Zea mays (maize);	IPR005630; IPR008949; IPR008930; IPR001906;	Terpene synthase, metal-binding domain; Isoprenoid synthase domain; Terpenoid cyclases/protein prenyltransferase alpha-alpha toroid; Terpene synthase, N-terminal domain;
Zm00001d006010_P001	uncharacterized protein	2.841	Up	0.0094406	nucleus
Zm00001d043335_P007	Branched-chain-amino-acid aminotransferase 5 chloroplastic	2.836	Up	0.036599	cytoplasm
Zm00001d050112_P008	Putative DUF1296 domain containing family protein	2.83	Up	0.00120202	nucleus				IPR009060;	UBA-like;
Zm00001d046717_P005	Brefeldin A-inhibited guanine nucleotide-exchange protein 1	2.829	Up	0.0087779	plasma membrane	K18442	ARFGEF; brefeldin A-inhibited guanine nucleotide-exchange protein	zma04144 Endocytosis - Zea mays (maize);	IPR023394; IPR000904; IPR016024; IPR015403;	Sec7 domain, alpha orthogonal bundle; Sec7 domain; Armadillo-type fold; Sec7, C-terminal;
Zm00001d028816_P001	Pathogenesis-related protein 10	2.819	Up	1.59723e-05	cytoplasm				IPR000916; IPR023393;	Bet v I/Major latex protein; START-like domain;
Zm00001d008691_P004	Autophagy-related protein 18c	2.807	Up	0.013681	nucleus	K22991			IPR017986; IPR015943;	WD40-repeat-containing domain; WD40/YVTN repeat-like-containing domain;
Zm00001d006753_P001	Indole-3-acetic acid amido synthetase	2.793	Up	0.0048614	chloroplast	K14487	GH3; auxin responsive GH3 gene family	zma04075 Plant hormone signal transduction - Zea mays (maize);
Zm00001d003015_P001	phenylalanine ammonia lyase6 GN= pal6	2.79	Up	5.594e-05	chloroplast	K10775	PAL; phenylalanine ammonia-lyase [EC:4.3.1.24]	zma00940 Phenylpropanoid biosynthesis - Zea mays (maize); zma01110 Biosynthesis of secondary metabolites - Zea mays (maize); zma01100 Metabolic pathways - Zea mays (maize); zma00360 Phenylalanine metabolism - Zea mays (maize);	IPR024083; IPR008948; IPR023144;	Fumarase/histidase, N-terminal; L-Aspartase-like; Phenylalanine ammonia-lyase, shielding domain;
Zm00001d046683_P019	Stromal processing peptidase chloroplastic	2.786	Up	0.0119428	chloroplast				IPR007863; IPR011249; IPR011237;	Peptidase M16, C-terminal; Metalloenzyme, LuxS/M16 peptidase-like; Peptidase M16 domain;
Zm00001d006036_P001	Heat shock 70 kDa protein 9 mitochondrial	2.777	Up	9.5372e-05	mitochondria	K04043	dnaK; molecular chaperone DnaK	zma03018 RNA degradation - Zea mays (maize);	IPR029048; IPR029047;	Heat shock protein 70kD, C-terminal domain; Heat shock protein 70kD, peptide-binding domain;
Zm00001d003268_P001	Ku70-binding family protein	2.765	Up	0.00026204	nucleus	K18156
Zm00001d037962_P007	malic enzyme5 GN= me5	2.762	Up	0.0025821	chloroplast	K00029	E1.1.1.40; malate dehydrogenase (oxaloacetate-decarboxylating)(NADP+) [EC:1.1.1.40]	zma01200 Carbon metabolism - Zea mays (maize); zma01100 Metabolic pathways - Zea mays (maize); zma00710 Carbon fixation in photosynthetic organisms - Zea mays (maize); zma00620 Pyruvate metabolism - Zea mays (maize);	IPR012302; IPR012301; IPR016040;	Malic enzyme, NAD-binding; Malic enzyme, N-terminal domain; NAD(P)-binding domain;
Zm00001d041495_P004	SRP40 carboxy-terminal domain protein	2.758	Up	0.0063154	chloroplast				IPR006594; IPR007718;	LIS1 homology motif; SRP40, C-terminal;
Zm00001d016130_P002	GDSL esterase/lipase	2.752	Up	0.0129428	extracellular				IPR001087; IPR013830;	GDSL lipase/esterase; SGNH hydrolase-type esterase domain;
Zm00001d018112_P008	Polyadenylate-binding protein 3	2.75	Up	0.0199593	cytoplasm	K14396	PABPN1; polyadenylate-binding protein 2	zma03015 mRNA surveillance pathway - Zea mays (maize);	IPR000504; IPR012677;	RNA recognition motif domain; Nucleotide-binding alpha-beta plait domain;
Zm00001d010727_P001	BAG family molecular chaperone regulator 8 chloroplastic	2.745	Up	0.003283	chloroplast				IPR003103;	BAG domain;
Zm00001d042287_P001	CDC5 protein	2.736	Up	0.00075697	nucleus	K12860	CDC5L; pre-mRNA-splicing factor CDC5/CEF1	zma03040 Spliceosome - Zea mays (maize);	IPR001005; IPR021786; IPR009057; IPR017930;	SANT/Myb domain; Pre-mRNA splicing factor component Cdc5p/Cef1; Homeobox domain-like; Myb domain;
Zm00001d034760_P001	"ferredoxin3 ubiquitous, cDNA clone, gene specific probe, amino acid sequence GN= fdx3"	2.711	Up	0.00043642	chloroplast	K02639	petF; ferredoxin	zma00195 Photosynthesis - Zea mays (maize);	IPR001041; IPR012675;	2Fe-2S ferredoxin-type iron-sulfur binding domain; Beta-grasp domain;
Zm00001d012284_P001	uncharacterized protein	2.711	Up	0.03304	nucleus
Zm00001d011486_P008	CTP synthase family protein	2.706	Up	0.0076596	cytoplasm	K01937	pyrG; CTP synthase [EC:6.3.4.2]	zma00240 Pyrimidine metabolism - Zea mays (maize); zma01100 Metabolic pathways - Zea mays (maize);	IPR017456; IPR027417; IPR017926; IPR033828; IPR029062;	CTP synthase, N-terminal; P-loop containing nucleoside triphosphate hydrolase; Glutamine amidotransferase; CTP synthase GATase domain; Class I glutamine amidotransferase-like;
Zm00001d035553_P001	ABC transporter G family member 6	2.703	Up	2.4313e-05	plasma membrane				IPR003593; IPR003439; IPR027417; IPR013525;	AAA+ ATPase domain; ABC transporter-like; P-loop containing nucleoside triphosphate hydrolase; ABC-2 type transporter;
Zm00001d027502_P002	Adenylate kinase 1 chloroplastic	2.692	Up	0.025459	chloroplast	K00939	adk; adenylate kinase [EC:2.7.4.3]	zma00730 Thiamine metabolism - Zea mays (maize); zma01110 Biosynthesis of secondary metabolites - Zea mays (maize); zma01100 Metabolic pathways - Zea mays (maize); zma00230 Purine metabolism - Zea mays (maize);	IPR027417;	P-loop containing nucleoside triphosphate hydrolase;
Zm00001d029365_P001	Non-specific lipid transfer protein-like 1	2.674	Up	0.029739	extracellular				IPR016140;	Bifunctional inhibitor/plant lipid transfer protein/seed storage helical domain;
Zm00001d025551_P004	Polyadenylate-binding protein RBP47B	2.656	Up	0.011984	nucleus				IPR000504; IPR012677;	RNA recognition motif domain; Nucleotide-binding alpha-beta plait domain;
Zm00001d029435_P001	Transducin/WD40 repeat-like superfamily protein	2.652	Up	0.0137192	nucleus	K12816	CDC40; pre-mRNA-processing factor 17	zma03040 Spliceosome - Zea mays (maize);	IPR017986; IPR015943;	WD40-repeat-containing domain; WD40/YVTN repeat-like-containing domain;
Zm00001d024843_P001	1-aminocyclopropane-1-carboxylate oxidase15 GN= acco31	2.649	Up	0.00138136	cytoplasm	K05933	E1.14.17.4; aminocyclopropanecarboxylate oxidase [EC:1.14.17.4]	zma01110 Biosynthesis of secondary metabolites - Zea mays (maize); zma01100 Metabolic pathways - Zea mays (maize); zma00270 Cysteine and methionine metabolism - Zea mays (maize);	IPR027443; IPR005123; IPR026992;	Isopenicillin N synthase-like; Oxoglutarate/iron-dependent dioxygenase; Non-haem dioxygenase N-terminal domain;
Zm00001d021629_P002	Protein DETOXIFICATION 40	2.644	Up	9.9132e-05	chloroplast	K03327
Zm00001d035915_P001	Proteasome subunit beta type	2.624	Up	0.0051775	chloroplast	K02739	PSMB7; 20S proteasome subunit beta 2 [EC:3.4.25.1]	zma03050 Proteasome - Zea mays (maize);	IPR029055;	Nucleophile aminohydrolases, N-terminal;
Zm00001d034949_P001	"GTP-binding protein homolog1 leaf cDNA csu108, partial sequence similar to Arabidopsis GTP binding protein, RHA1 GN= gbp1"	2.612	Up	0.049122	chloroplast	K07889	RAB5C; Ras-related protein Rab-5C	zma04144 Endocytosis - Zea mays (maize); zma04145 Phagosome - Zea mays (maize);	IPR005225; IPR027417;	Small GTP-binding protein domain; P-loop containing nucleoside triphosphate hydrolase;
Zm00001d010128_P001	acidic ribosomal protein P2b (rpp2b) GN= arpp2b	2.612	Up	0.0026389	chloroplast	K02943	RP-LP2; large subunit ribosomal protein LP2	zma03010 Ribosome - Zea mays (maize);
Zm00001d027731_P011	evolutionarily conserved C-terminal region 2	2.612	Up	1.68003e-05	nucleus				IPR007275;	YTH domain;
Zm00001d015798_P001	Subtilisin-like protease SBT5.3	2.602	Up	0.00048247	chloroplast				IPR003137; IPR034197; IPR000209; IPR010259;	PA domain; Cucumisin-like catalytic domain; Peptidase S8/S53 domain; Peptidase S8 propeptide/proteinase inhibitor I9;
Zm00001d040988_P001	RNA-dependent RNA polymerase6 mutant seedlings with reduced fully abaxialized organs that arrest shortly after germination GN= rdr6	2.601	Up	0.0041778	chloroplast	K11699
Zm00001d048503_P001	alpha/beta-Hydrolases superfamily protein	2.591	Up	7.7852e-05	chloroplast				IPR029058; IPR000073;	Alpha/Beta hydrolase fold; Alpha/beta hydrolase fold-1;
Zm00001d045340_P003	Pyridoxal-5'-phosphate-dependent enzyme family protein	2.589	Up	0.022235	cytoplasm	K01738	cysK; cysteine synthase [EC:2.5.1.47]	zma01230 Biosynthesis of amino acids - Zea mays (maize); zma01200 Carbon metabolism - Zea mays (maize); zma00920 Sulfur metabolism - Zea mays (maize); zma01110 Biosynthesis of secondary metabolites - Zea mays (maize); zma01100 Metabolic pathways - Zea mays (maize); zma00270 Cysteine and methionine metabolism - Zea mays (maize);	IPR001926;	Tryptophan synthase beta subunit-like PLP-dependent enzyme;
Zm00001d031129_P001	HSP20-like chaperones superfamily protein	2.573	Up	0.00183794	nucleus				IPR002068; IPR008978;	Alpha crystallin/Hsp20 domain; HSP20-like chaperone;
Zm00001d029353_P004	benzoxazinone synthesis12 GN= bx12	2.572	Up	0.0048967	cytoplasm				IPR011991; IPR012967; IPR029063; IPR001077;	Winged helix-turn-helix DNA-binding domain; Plant methyltransferase dimerisation; S-adenosyl-L-methionine-dependent methyltransferase; O-methyltransferase, family 2;
Zm00001d050218_P001	NADPH--cytochrome P450 reductase	2.564	Up	3.1166e-06	chloroplast	K00327			IPR017927; IPR008254; IPR029039; IPR001433; IPR017938; IPR003097; IPR023173; IPR001709;	Ferredoxin reductase-type FAD-binding domain; Flavodoxin/nitric oxide synthase; Flavoprotein-like domain; Oxidoreductase FAD/NAD(P)-binding; Riboflavin synthase-like beta-barrel; FAD-binding, type 1; NADPH-cytochrome p450 reductase, FAD-binding, alpha-helical domain-3; Flavoprotein pyridine nucleotide cytochrome reductase;
Zm00001d026254_P001	60S ribosomal protein L7-2	2.563	Up	0.00069644	cytoplasm	K02937	RP-L7e; large subunit ribosomal protein L7e	zma03010 Ribosome - Zea mays (maize);	IPR012988; IPR016082;	Ribosomal protein L30, N-terminal; Ribosomal protein L30, ferredoxin-like fold domain;
Zm00001d012161_P002	60S ribosomal protein L5-1 homolog b GN= rpl5b	2.562	Up	0.0058353	cytoplasm	K02932	RP-L5e; large subunit ribosomal protein L5e	zma03010 Ribosome - Zea mays (maize);	IPR025607;	Ribosomal protein L5 eukaryotic/L18 archaeal, C-terminal;
Zm00001d040617_P003	60S ribosomal protein L29	2.559	Up	7.5919e-05	nucleus	K02905	RP-L29e; large subunit ribosomal protein L29e	zma03010 Ribosome - Zea mays (maize);
Zm00001d037684_P001	uncharacterized protein	2.557	Up	0.0325	nucleus
Zm00001d032102_P001	DUF761 domain protein	2.557	Up	0.00040201	nucleus
Zm00001d025998_P001	Ubiquitin carboxyl-terminal hydrolase 3	2.554	Up	0.036664	chloroplast	K05609			IPR001578;	Peptidase C12, ubiquitin carboxyl-terminal hydrolase;
Zm00001d039106_P004	40S ribosomal protein S12	2.553	Up	8.083e-05	chloroplast	K02951	RP-S12e; small subunit ribosomal protein S12e	zma03010 Ribosome - Zea mays (maize);	IPR029064; IPR004038;	50S ribosomal protein L30e-like; Ribosomal protein L7Ae/L30e/S12e/Gadd45;
Zm00001d018812_P001	uncharacterized protein	2.552	Up	0.00047915	chloroplast
Zm00001d006474_P001	Autophagy-related protein 8a	2.547	Up	0.0171646	cytoplasm	K08341	GABARAP; GABA(A) receptor-associated protein	zma04136 Autophagy - other - Zea mays (maize);	IPR029071;	Ubiquitin-related domain;
Zm00001d009910_P001	Catalytic/ oxidoreductase%2C acting on NADH or NADPH	2.54	Up	1.70924e-05	chloroplast	K18170
Zm00001d014748_P001	(Z)-3-hexen-1-ol acetyltransferase	2.511	Up	0.00132047	chloroplast	K19861			IPR023213;	Chloramphenicol acetyltransferase-like domain;
Zm00001d006008_P001	Heat shock protein 90-2	2.51	Up	4.4204e-07	cytoplasm	K04079	HSP90A; molecular chaperone HtpG	zma04626 Plant-pathogen interaction - Zea mays (maize); zma04141 Protein processing in endoplasmic reticulum - Zea mays (maize);	IPR020575; IPR020568; IPR003594;	Heat shock protein Hsp90, N-terminal; Ribosomal protein S5 domain 2-type fold; Histidine kinase-like ATPase, C-terminal domain;
Zm00001d023769_P003	Delta(12)-fatty-acid desaturase	2.505	Up	0.009663	mitochondria				IPR021863; IPR005804;	Fatty acid desaturase, N-terminal; Fatty acid desaturase domain;
Zm00001d028782_P007	Eukaryotic translation initiation factor 2 subunit alpha	2.497	Up	0.0059407	cytoplasm	K03237	EIF2S1; translation initiation factor 2 subunit 1	zma04141 Protein processing in endoplasmic reticulum - Zea mays (maize); zma03013 RNA transport - Zea mays (maize);	IPR024054; IPR012340; IPR003029; IPR022967; IPR024055;	Translation initiation factor 2, alpha subunit, middle domain; Nucleic acid-binding, OB-fold; S1 domain; RNA-binding domain, S1; Translation initiation factor 2, alpha subunit, C-terminal;
Zm00001d048957_P002	uncharacterized protein	2.495	Up	8.0737e-05	nucleus
Zm00001d000428_P001	Transmembrane 9 superfamily member 9	2.48	Up	0.0084843	chloroplast	K17086			IPR020846;	Major facilitator superfamily domain;
Zm00001d012257_P006	uncharacterized protein	2.479	Up	0.033024	nucleus
Zm00001d043795_P001	Glutathione S-transferase GSTU6	2.476	Up	0.0034367	vacuolar membrane	K00799	GST; glutathione S-transferase [EC:2.5.1.18]	zma00480 Glutathione metabolism - Zea mays (maize);	IPR010987; IPR004045; IPR012336;	Glutathione S-transferase, C-terminal-like; Glutathione S-transferase, N-terminal; Thioredoxin-like fold;
Zm00001d034797_P004	diphthamide synthesis DPH2 family protein	2.465	Up	0.00041967	chloroplast	K17866
Zm00001d036878_P003	Protein WVD2-like 5	2.463	Up	0.0160246	nucleus				IPR027329;	TPX2, C-terminal;
Zm00001d049095_P004	EMB2756 (EMBRYO DEFECTIVE 2756)	2.453	Up	0.025644	nucleus
Zm00001d034776_P006	Elongation factor 2	2.432	Up	2.4645e-05	cytoplasm	K03234			IPR027417; IPR000795; IPR005517; IPR005225; IPR000640; IPR004161; IPR020568; IPR009022; IPR014721; IPR009000;	P-loop containing nucleoside triphosphate hydrolase; Transcription factor, GTP-binding domain; Translation elongation factor EFG/EF2, domain IV; Small GTP-binding protein domain; Translation elongation factor EFG, V domain; Translation elongation factor EFTu-like, domain 2; Ribosomal protein S5 domain 2-type fold; Elongation factor G, III-V domain; Ribosomal protein S5 domain 2-type fold, subgrou…
Zm00001d011418_P004	cytochrome P450 family 72 subfamily A polypeptide 8	2.412	Up	0.04832	chloroplast
Zm00001d032760_P001	60S ribosomal protein L21-1	2.412	Up	0.0036156	cytoplasm	K02889	RP-L21e; large subunit ribosomal protein L21e	zma03010 Ribosome - Zea mays (maize);	IPR008991;	Translation protein SH3-like domain;
Zm00001d018461_P001	Thioredoxin	2.406	Up	0.00024221	cytoplasm	K22762			IPR008580;	PPPDE putative peptidase domain;
Zm00001d051187_P004	ADP-ribosylation factor GTPase-activating protein AGD2	2.399	Up	0.0002043	chloroplast	K12489	ACAP; Arf-GAP with coiled-coil, ANK repeat and PH domain-containing protein	zma04144 Endocytosis - Zea mays (maize);	IPR027267; IPR011993; IPR004148; IPR001849;	Arfaptin homology (AH) domain/BAR domain; PH domain-like; BAR domain; Pleckstrin homology domain;
Zm00001d051067_P022	EXPRESSED IN 24 plant structures GN=LOCATED IN: cytosol chloroplast	2.397	Up	0.00098169	nucleus
Zm00001d050920_P002	60S ribosomal protein L6	2.397	Up	0.0035044	chloroplast	K02934	RP-L6e; large subunit ribosomal protein L6e	zma03010 Ribosome - Zea mays (maize);	IPR008991; IPR014722;	Translation protein SH3-like domain; Ribosomal protein L2 domain 2;
Zm00001d019087_P007	proline-rich family protein	2.39	Up	0.0109	nucleus
Zm00001d037689_P001	hexokinase7 GN= hex7	2.375	Up	0.0136808	cytoplasm	K00844	HK; hexokinase [EC:2.7.1.1]	zma00052 Galactose metabolism - Zea mays (maize); zma00010 Glycolysis / Gluconeogenesis - Zea mays (maize); zma01200 Carbon metabolism - Zea mays (maize); zma00500 Starch and sucrose metabolism - Zea mays (maize); zma00520 Amino sugar and nucleotide sugar metabolism - Zea mays (maize); zma01110 Biosynthesis of secondary metabolites - Zea mays (maize); zma01100 Metabolic pathways - Zea mays (maize…	IPR022672; IPR022673;	Hexokinase, N-terminal; Hexokinase, C-terminal;
Zm00001d009888_P001	DNA primase	2.369	Up	0.022237	nucleus	K02684	PRI1; DNA primase small subunit [EC:2.7.7.-]	zma00240 Pyrimidine metabolism - Zea mays (maize); zma01100 Metabolic pathways - Zea mays (maize); zma00230 Purine metabolism - Zea mays (maize); zma03030 DNA replication - Zea mays (maize);
Zm00001d041979_P001	Chloroplast outer envelope 24 kD protein	2.369	Up	0.0120755	mitochondria
Zm00001d018514_P004	Protein BTR1	2.368	Up	0.00108026	nucleus	K14944			IPR004087; IPR004088;	K Homology domain; K Homology domain, type 1;
Zm00001d043052_P007	Endoplasmic reticulum vesicle transporter protein	2.367	Up	0.0052595	cytoplasm				IPR012936;	Endoplasmic reticulum vesicle transporter, C-terminal;
Zm00001d020224_P002	Has 214 Blast hits to 214 proteins in 102 species Archae - 0 GN=CONTAINS InterPro DOMAIN/s: Mitochondrial distribution/morphology family 35/apoptosis (InterPro:IPR007918)	2.364	Up	6.4877e-05	chloroplast	K17968
Zm00001d017029_P007	phosphoinositide binding	2.362	Up	3.8598e-06	nucleus				IPR011990;	Tetratricopeptide-like helical domain;
Zm00001d009660_P001	Protein kinase superfamily protein	2.361	Up	0.00138081	cytoplasm				IPR000719; IPR001245; IPR011009;	Protein kinase domain; Serine-threonine/tyrosine-protein kinase catalytic domain; Protein kinase-like domain;
Zm00001d014134_P001	Ent-cassadiene C2-hydroxylase	2.359	Up	0.00030217	chloroplast
Zm00001d018979_P003	40S ribosomal protein S15-4	2.357	Up	0.00177996	cytoplasm	K02958	RP-S15e; small subunit ribosomal protein S15e	zma03010 Ribosome - Zea mays (maize);	IPR023575;	Ribosomal protein S19, superfamily;
Zm00001d004807_P001	Coatomer subunit beta-1	2.355	Up	0.00091781	endoplasmic reticulum	K17301			IPR011710; IPR011989; IPR029446; IPR016024; IPR002553;	Coatomer beta subunit, C-terminal; Armadillo-like helical; Coatomer beta subunit, appendage platform domain; Armadillo-type fold; Clathrin/coatomer adaptor, adaptin-like, N-terminal;
Zm00001d002338_P001	UDP-N-acetylglucosamine diphosphorylase 2	2.346	Up	3.7267e-05	chloroplast	K00972	UAP1; UDP-N-acetylglucosamine/UDP-N-acetylgalactosamine diphosphorylase [EC:2.7.7.23 2.7.7.83]	zma00520 Amino sugar and nucleotide sugar metabolism - Zea mays (maize); zma01100 Metabolic pathways - Zea mays (maize);	IPR029044;	Nucleotide-diphospho-sugar transferases;
Zm00001d039020_P001	60S ribosomal protein L18a-2	2.337	Up	0.021817	plasma membrane	K02882	RP-L18Ae; large subunit ribosomal protein L18Ae	zma03010 Ribosome - Zea mays (maize);	IPR023573;	Ribosomal protein 50S-L18Ae/60S-L20/60S-L18A;
Zm00001d030357_P002	Ubiquitin carboxyl-terminal hydrolase 10	2.324	Up	0.025799	nucleus				IPR006615; IPR028889; IPR001394;	Peptidase C19, ubiquitin-specific peptidase, DUSP domain; Ubiquitin specific protease domain; Peptidase C19, ubiquitin carboxyl-terminal hydrolase;
Zm00001d005306_P003	Dynamin-related protein 1E	2.32	Up	0.0066992	mitochondria				IPR030381; IPR003130; IPR027417; IPR020850; IPR001401; IPR000375;	Dynamin-type guanine nucleotide-binding (G) domain; Dynamin GTPase effector; P-loop containing nucleoside triphosphate hydrolase; GTPase effector domain; Dynamin, GTPase domain; Dynamin central domain;
Zm00001d024702_P001	Tryptophan synthase beta chain 2%2C chloroplastic	2.319	Up	0.00093811	chloroplast	K01696	trpB; tryptophan synthase beta chain [EC:4.2.1.20]	zma01230 Biosynthesis of amino acids - Zea mays (maize); zma01110 Biosynthesis of secondary metabolites - Zea mays (maize); zma01100 Metabolic pathways - Zea mays (maize); zma00260 Glycine, serine and threonine metabolism - Zea mays (maize); zma00400 Phenylalanine, tyrosine and tryptophan biosynthesis - Zea mays (maize);	IPR001926;	Tryptophan synthase beta subunit-like PLP-dependent enzyme;
Zm00001d039560_P002	Thioredoxin superfamily protein	2.318	Up	0.00097682	cytoplasm				IPR024253; IPR012336;	Phosducin, thioredoxin-like domain; Thioredoxin-like fold;
Zm00001d037200_P002	Polyadenylate-binding protein 3	2.315	Up	0.00040101	nucleus	K14396	PABPN1; polyadenylate-binding protein 2	zma03015 mRNA surveillance pathway - Zea mays (maize);	IPR000504; IPR012677;	RNA recognition motif domain; Nucleotide-binding alpha-beta plait domain;
Zm00001d046552_P002	Charged multivesicular body protein 4b%3B Putative SNF domain containing family protein	2.314	Up	0.00055688	chloroplast	K12194	CHMP4; charged multivesicular body protein 4	zma04144 Endocytosis - Zea mays (maize);
Zm00001d003730_P002	Histone H3.2	2.308	Up	5.5084e-05	nucleus	K11253			IPR009072; IPR007125;	Histone-fold; Histone H2A/H2B/H3;
Zm00001d038467_P002	"replication origin activator1 cDNA Z29368, homology with yeast and vertebrate DNA licensing activity GN= roa1"	2.306	Up	0.00037667	cytoplasm	K02541	MCM3; DNA replication licensing factor MCM3 [EC:3.6.4.12]	zma03030 DNA replication - Zea mays (maize);	IPR003593; IPR012340; IPR001208; IPR033762; IPR027417; IPR027925;	AAA+ ATPase domain; Nucleic acid-binding, OB-fold; MCM domain; MCM OB domain; P-loop containing nucleoside triphosphate hydrolase; MCM N-terminal domain;
Zm00001d040067_P001	Glycosyltransferase family 61 protein	2.303	Up	0.049416	cytoplasm
Zm00001d023779_P001	3-hydroxyisobutyryl-CoA hydrolase 1	2.3	Up	0.00023598	nucleus	K05605	HIBCH; 3-hydroxyisobutyryl-CoA hydrolase [EC:3.1.2.4]	zma01200 Carbon metabolism - Zea mays (maize); zma00640 Propanoate metabolism - Zea mays (maize); zma00410 beta-Alanine metabolism - Zea mays (maize); zma01100 Metabolic pathways - Zea mays (maize); zma00280 Valine, leucine and isoleucine degradation - Zea mays (maize);	IPR029045;	ClpP/crotonase-like domain;
Zm00001d030163_P002	uncharacterized protein	2.295	Up	0.0165218	endoplasmic reticulum				IPR029063;	S-adenosyl-L-methionine-dependent methyltransferase;
Zm00001d034872_P002	nuclear factor Y subunit C10	2.294	Up	0.0071592	nucleus				IPR009072; IPR003958;	Histone-fold; Transcription factor CBF/NF-Y/archaeal histone domain;
Zm00001d007369_P021	Serine--tRNA ligase cytoplasmic	2.289	Up	9.5812e-05	cytoplasm	K01875	SARS; seryl-tRNA synthetase [EC:6.1.1.11]	zma00970 Aminoacyl-tRNA biosynthesis - Zea mays (maize);	IPR010978; IPR002314; IPR015866; IPR006195; IPR033729;	tRNA-binding arm; Aminoacyl-tRNA synthetase, class II (G/ P/ S/T); Serine-tRNA synthetase, type1, N-terminal; Aminoacyl-tRNA synthetase, class II; Serine-tRNA ligase catalytic core domain;
Zm00001d012911_P003	Huntingtin interacting protein K	2.278	Up	0.00081996	cytoplasm
Zm00001d002781_P027	"RNA recognition water-stress protein1 water-stress protein, with RNA recognition motif GN= rws1"	2.277	Up	0.0112807	nucleus
Zm00001d050238_P012	uncharacterized protein	2.267	Up	0.027096	nucleus
Zm00001d014146_P001	Hsp20/alpha crystallin family protein	2.262	Up	0.0158636	mitochondria				IPR002068; IPR008978;	Alpha crystallin/Hsp20 domain; HSP20-like chaperone;
Zm00001d039081_P007	CTP synthase family protein	2.244	Up	0.0085598	cytoplasm	K01937	pyrG; CTP synthase [EC:6.3.4.2]	zma00240 Pyrimidine metabolism - Zea mays (maize); zma01100 Metabolic pathways - Zea mays (maize);	IPR017456; IPR027417; IPR017926; IPR033828; IPR029062;	CTP synthase, N-terminal; P-loop containing nucleoside triphosphate hydrolase; Glutamine amidotransferase; CTP synthase GATase domain; Class I glutamine amidotransferase-like;
Zm00001d022457_P001	"peroxidase3 electrophoretic mobility, anodal GN= px3"	2.242	Up	0.023258	chloroplast	K00430	E1.11.1.7; peroxidase [EC:1.11.1.7]	zma00940 Phenylpropanoid biosynthesis - Zea mays (maize); zma01110 Biosynthesis of secondary metabolites - Zea mays (maize); zma01100 Metabolic pathways - Zea mays (maize);	IPR033905; IPR002016;	Secretory peroxidase; Haem peroxidase, plant/fungal/bacterial;
Zm00001d018040_P005	DCD (Development and Cell Death) domain protein	2.238	Up	0.041002	mitochondria				IPR013989;	Development/cell death domain;
Zm00001d016696_P002	alpha/beta-Hydrolases superfamily protein	2.236	Up	0.0022038	mitochondria				IPR029058; IPR000073;	Alpha/Beta hydrolase fold; Alpha/beta hydrolase fold-1;
Zm00001d037246_P007	Defective in cullin neddylation protein	2.234	Up	0.032478	cytoplasm	K17822			IPR005176;	Potentiating neddylation domain;
Zm00001d049815_P005	ribosomal protein L17b GN= rpl17b	2.23	Up	0.00034335	nucleus	K02880	RP-L17e; large subunit ribosomal protein L17e	zma03010 Ribosome - Zea mays (maize);
Zm00001d023788_P002	Lysine-specific demethylase REF6	2.225	Up	0.031075	nucleus				IPR015880; IPR007087; IPR013087;	Zinc finger, C2H2-like; Zinc finger, C2H2; Zinc finger C2H2-type/integrase DNA-binding domain;
Zm00001d042394_P010	BLISTER	2.224	Up	0.000164351	nucleus
Zm00001d048507_P006	Major Facilitator family protein%3B Major Facilitator superfamily protein	2.221	Up	0.0030632	plasma membrane				IPR020846;	Major facilitator superfamily domain;
Zm00001d025132_P001	Nucleic acid-binding OB-fold-like protein	2.219	Up	0.0034798	nucleus	K03236	EIF1A; translation initiation factor 1A	zma03013 RNA transport - Zea mays (maize);	IPR012340; IPR006196;	Nucleic acid-binding, OB-fold; RNA-binding domain, S1, IF1 type;
Zm00001d010210_P001	potassium channel6 GN= kch6	2.218	Up	0.00189616	chloroplast	K21867			IPR000595; IPR018490; IPR005821; IPR020683; IPR014710; IPR021789;	Cyclic nucleotide-binding domain; Cyclic nucleotide-binding-like; Ion transport domain; Ankyrin repeat-containing domain; RmlC-like jelly roll fold; KHA domain;
Zm00001d009591_P010	GBF-interacting protein 1	2.217	Up	0.0155758	nucleus				IPR009060;	UBA-like;
Zm00001d006196_P001	30S ribosomal protein S31	2.216	Up	0.0052614	chloroplast	K19033
Zm00001d040248_P001	Laccase-7	2.211	Up	0.0163362	chloroplast	K05909			IPR011706; IPR008972; IPR011707; IPR034285; IPR034288; IPR001117;	Multicopper oxidase, type 2; Cupredoxin; Multicopper oxidase, type 3; Laccase, second cupredoxin domain; Laccase, first cupredoxin domain; Multicopper oxidase, type 1;
Zm00001d037711_P001	Leucine-rich repeat extensin-like protein 3	2.207	Up	0.0057792	extracellular				IPR032675;	Leucine-rich repeat domain, L domain-like;
Zm00001d041730_P003	uncharacterized protein	2.205	Up	5.5902e-05	nucleus				IPR001607; IPR013083;	Zinc finger, UBP-type; Zinc finger, RING/FYVE/PHD-type;
Zm00001d038380_P004	Ras-related protein RABE1c	2.202	Up	0.039736	cytoplasm	K07901	RAB8A; Ras-related protein Rab-8A	zma04144 Endocytosis - Zea mays (maize);	IPR005225; IPR027417;	Small GTP-binding protein domain; P-loop containing nucleoside triphosphate hydrolase;
Zm00001d018969_P001	"tryptophan synthase alpha subunit1 With products of orp1 and orp2 genes, forms tryptophan synthase. Plastidic. GN= tsa1"	2.199	Up	0.00134124	chloroplast	K01695	trpA; tryptophan synthase alpha chain [EC:4.2.1.20]	zma01230 Biosynthesis of amino acids - Zea mays (maize); zma01110 Biosynthesis of secondary metabolites - Zea mays (maize); zma01100 Metabolic pathways - Zea mays (maize); zma00260 Glycine, serine and threonine metabolism - Zea mays (maize); zma00400 Phenylalanine, tyrosine and tryptophan biosynthesis - Zea mays (maize);	IPR013785; IPR011060;	Aldolase-type TIM barrel; Ribulose-phosphate binding barrel;
Zm00001d018495_P003	Thioredoxin-like 3-2 chloroplastic	2.196	Up	0.0038752	chloroplast				IPR013766; IPR012336;	Thioredoxin domain; Thioredoxin-like fold;
Zm00001d013830_P001	cytochrome P450 family 76 subfamily C polypeptide 7	2.195	Up	0.0023365	chloroplast
Zm00001d002334_P001	AICARFT/IMPCHase bienzyme family protein	2.189	Up	0.00077981	chloroplast	K00602	purH; phosphoribosylaminoimidazolecarboxamide formyltransferase / IMP cyclohydrolase [EC:2.1.2.3 3.5.4.10]	zma01110 Biosynthesis of secondary metabolites - Zea mays (maize); zma01100 Metabolic pathways - Zea mays (maize); zma00670 One carbon pool by folate - Zea mays (maize); zma00230 Purine metabolism - Zea mays (maize);	IPR016193; IPR024051; IPR011607;	Cytidine deaminase-like; AICAR transformylase domain; Methylglyoxal synthase-like domain;
Zm00001d033480_P002	5-methyltetrahydropteroyltriglutamate--homocysteine methyltransferase	2.186	Up	0.0140439	cytoplasm	K00549	metE; 5-methyltetrahydropteroyltriglutamate--homocysteine methyltransferase [EC:2.1.1.14]	zma01230 Biosynthesis of amino acids - Zea mays (maize); zma01110 Biosynthesis of secondary metabolites - Zea mays (maize); zma01100 Metabolic pathways - Zea mays (maize); zma00450 Selenocompound metabolism - Zea mays (maize); zma00270 Cysteine and methionine metabolism - Zea mays (maize);	IPR013215; IPR002629;	Cobalamin-independent methionine synthase MetE, N-terminal; Cobalamin-independent methionine synthase MetE, C-terminal/archaeal;
Zm00001d008548_P001	Bowman-Birk type wound-induced proteinase inhibitor WIP1	2.184	Up	0.027142	extracellular				IPR000877;	Proteinase inhibitor I12, Bowman-Birk;
Zm00001d028665_P001	uncharacterized protein	2.183	Up	0.00073642	chloroplast
Zm00001d019283_P008	Calreticulin	2.18	Up	0.00126273	chloroplast	K08057	CALR; calreticulin	zma04145 Phagosome - Zea mays (maize); zma04141 Protein processing in endoplasmic reticulum - Zea mays (maize);	IPR009033; IPR013320;	Calreticulin/calnexin, P domain; Concanavalin A-like lectin/glucanase domain;
Zm00001d053980_P002	Thymidylate kinase	2.179	Up	0.049781	cytoplasm	K10999			IPR027417;	P-loop containing nucleoside triphosphate hydrolase;
Zm00001d042950_P001	Lung seven transmembrane receptor family protein	2.177	Up	0.0104634	plasma membrane	K22985
Zm00001d021647_P005	ABC transporter G family member 34	2.177	Up	0.0024551	plasma membrane				IPR003593; IPR003439; IPR027417; IPR034003; IPR013581; IPR013525;	AAA+ ATPase domain; ABC transporter-like; P-loop containing nucleoside triphosphate hydrolase; ATP-binding cassette transporter, PDR-like subfamily G, domain 2; Plant PDR ABC transporter associated; ABC-2 type transporter;
Zm00001d009084_P001	S-adenosyl-L-methionine-dependent methyltransferases superfamily protein	2.176	Up	0.031618	mitochondria				IPR029063; IPR013216;	S-adenosyl-L-methionine-dependent methyltransferase; Methyltransferase type 11;
Zm00001d007623_P003	Patatin-like protein 2	2.168	Up	0.024199	chloroplast				IPR016035; IPR002641;	Acyl transferase/acyl hydrolase/lysophospholipase; Patatin/Phospholipase A2-related;
Zm00001d000294_P001	O-succinylhomoserine sulfhydrylase	2.164	Up	0.00033685	chloroplast	K01761	E4.4.1.11; methionine-gamma-lyase [EC:4.4.1.11]	zma00450 Selenocompound metabolism - Zea mays (maize); zma00270 Cysteine and methionine metabolism - Zea mays (maize);	IPR015424; IPR015421; IPR015422;	Pyridoxal phosphate-dependent transferase; Pyridoxal phosphate-dependent transferase, major region, subdomain 1; Pyridoxal phosphate-dependent transferase, major region, subdomain 2;
Zm00001d020794_P001	Blue copper protein	2.163	Up	0.0059558	extracellular				IPR003245; IPR008972;	Phytocyanin domain; Cupredoxin;
Zm00001d047111_P001	extensin-like protein	2.163	Up	0.00049631	extracellular				IPR016140; IPR027923;	Bifunctional inhibitor/plant lipid transfer protein/seed storage helical domain; Hydrophobic seed protein;
Zm00001d023802_P001	Heat shock 70 kDa protein 6 chloroplastic	2.16	Up	0.008856	chloroplast	K03283	HSPA1s; heat shock 70kDa protein 1/2/6/8	zma04144 Endocytosis - Zea mays (maize); zma03040 Spliceosome - Zea mays (maize); zma04141 Protein processing in endoplasmic reticulum - Zea mays (maize);	IPR029048; IPR029047;	Heat shock protein 70kD, C-terminal domain; Heat shock protein 70kD, peptide-binding domain;
Zm00001d002685_P001	Thioredoxin-like 3-3	2.156	Up	0.0122772	nucleus	K03671			IPR013766; IPR012336;	Thioredoxin domain; Thioredoxin-like fold;
Zm00001d019262_P002	Proteasome subunit beta type	2.151	Up	0.019436	chloroplast	K02739	PSMB7; 20S proteasome subunit beta 2 [EC:3.4.25.1]	zma03050 Proteasome - Zea mays (maize);	IPR029055;	Nucleophile aminohydrolases, N-terminal;
Zm00001d045475_P001	Histone H3	2.151	Up	1.8772e-06	nucleus	K11253			IPR009072; IPR007125;	Histone-fold; Histone H2A/H2B/H3;
Zm00001d029352_P005	SAP domain-containing protein	2.135	Up	0.0044842	nucleus	K12875	ACIN1; apoptotic chromatin condensation inducer in the nucleus	zma03015 mRNA surveillance pathway - Zea mays (maize); zma03040 Spliceosome - Zea mays (maize); zma03013 RNA transport - Zea mays (maize);	IPR003034; IPR034257; IPR000504;	SAP domain; Acinus, RNA recognition motif; RNA recognition motif domain;
Zm00001d026578_P002	60S acidic ribosomal protein P2-5	2.13	Up	0.0022842	chloroplast	K02943	RP-LP2; large subunit ribosomal protein LP2	zma03010 Ribosome - Zea mays (maize);
Zm00001d042767_P001	Glucan endo-13-beta-glucosidase 14	2.129	Up	2.1655e-05	chloroplast				IPR017853; IPR013781;	Glycoside hydrolase superfamily; Glycoside hydrolase, catalytic domain;
Zm00001d006596_P001	Elongation factor 1-alpha 2	2.128	Up	0.0042841	cytoplasm	K03231	EEF1A; elongation factor 1-alpha	zma03013 RNA transport - Zea mays (maize);	IPR004160; IPR004161; IPR009001; IPR027417; IPR000795; IPR009000;	Translation elongation factor EFTu/EF1A, C-terminal; Translation elongation factor EFTu-like, domain 2; Translation elongation factor EF1A/initiation factor IF2gamma, C-terminal; P-loop containing nucleoside triphosphate hydrolase; Transcription factor, GTP-binding domain; Translation protein, beta-barrel domain;
Zm00001d046445_P005	Transducin/WD40 repeat-like superfamily protein	2.128	Up	0.0026577	cytoplasm	K13137	STRAP; serine-threonine kinase receptor-associated protein	zma03013 RNA transport - Zea mays (maize);	IPR017986; IPR015943;	WD40-repeat-containing domain; WD40/YVTN repeat-like-containing domain;
Zm00001d046442_P002	SOUL heme-binding family protein	2.124	Up	0.022981	chloroplast				IPR011256;	Regulatory factor, effector binding domain;
Zm00001d023856_P001	RALF	2.124	Up	0.0082417	extracellular
Zm00001d023516_P001	Salt stress-induced protein	2.122	Up	0.0021232	mitochondria				IPR001229; IPR033734;	Jacalin-like lectin domain; Jacalin-like lectin domain, plant;
Zm00001d006725_P001	Eukaryotic peptide chain release factor subunit 1-2	2.114	Up	0.00026166	cytoplasm	K03265	ETF1; peptide chain release factor subunit 1	zma03015 mRNA surveillance pathway - Zea mays (maize);	IPR005141; IPR029064; IPR005142; IPR005140; IPR024049;	eRF1 domain 2; 50S ribosomal protein L30e-like; eRF1 domain 3; eRF1 domain 1/Pelota-like; Peptide Chain Release Factor eRF1/aRF1, N-terminal;
Zm00001d017296_P006	uncharacterized protein	2.112	Up	0.0028027	nucleus				IPR019273;	Lunapark domain;
Zm00001d019091_P001	Vesicle-associated membrane protein 722	2.111	Up	0.0004621	extracellular	K08515	VAMP7; vesicle-associated membrane protein 7	zma04130 SNARE interactions in vesicular transport - Zea mays (maize);	IPR010908; IPR011012; IPR001388;	Longin domain; Longin-like domain; Synaptobrevin;
Zm00001d023768_P001	Delta(12)-fatty-acid desaturase	2.107	Up	0.00109988	chloroplast				IPR021863; IPR005804;	Fatty acid desaturase, N-terminal; Fatty acid desaturase domain;
Zm00001d019060_P001	deoxy xylulose synthase 2 root specific GN= dxs2	2.099	Up	0.004117	chloroplast	K01662	dxs; 1-deoxy-D-xylulose-5-phosphate synthase [EC:2.2.1.7]	zma00900 Terpenoid backbone biosynthesis - Zea mays (maize); zma00730 Thiamine metabolism - Zea mays (maize); zma01110 Biosynthesis of secondary metabolites - Zea mays (maize); zma01100 Metabolic pathways - Zea mays (maize);	IPR005474; IPR009014; IPR033248; IPR005475; IPR029061;	Transketolase, N-terminal; Transketolase C-terminal/Pyruvate-ferredoxin oxidoreductase domain II; Transketolase, C-terminal domain; Transketolase-like, pyrimidine-binding domain; Thiamin diphosphate-binding fold;
Zm00001d007207_P005	Probable protein phosphatase 2C 5	2.099	Up	0.036197	chloroplast				IPR001932;	PPM-type phosphatase domain;
Zm00001d035762_P001	Charged multivesicular body protein 5%3B Putative SNF domain containing family protein	2.098	Up	0.00195675	nucleus	K12198	CHMP5; charged multivesicular body protein 5	zma04144 Endocytosis - Zea mays (maize);
Zm00001d043861_P001	THO complex subunit 2	2.096	Up	1.3656e-06	nucleus	K12879	THOC2; THO complex subunit 2	zma03040 Spliceosome - Zea mays (maize); zma03013 RNA transport - Zea mays (maize);	IPR021418; IPR032302; IPR021726;	THO complex, subunitTHOC2, C-terminal; THO complex subunit 2, N-terminal domain; THO complex, subunitTHOC2, N-terminal;
Zm00001d022059_P002	PLASMODESMATA CALLOSE-BINDING PROTEIN 2	2.093	Up	0.027237	extracellular				IPR012946;	X8 domain;
Zm00001d052855_P001	HSP protein%3B Putative heat shock protein 90 family protein	2.09	Up	2.217e-05	nucleus	K04079	HSP90A; molecular chaperone HtpG	zma04626 Plant-pathogen interaction - Zea mays (maize); zma04141 Protein processing in endoplasmic reticulum - Zea mays (maize);	IPR020575; IPR020568; IPR003594;	Heat shock protein Hsp90, N-terminal; Ribosomal protein S5 domain 2-type fold; Histidine kinase-like ATPase, C-terminal domain;
Zm00001d017914_P001	H/ACA ribonucleoprotein complex subunit 2-like protein	2.089	Up	0.00292	cytoplasm	K11129	NHP2; H/ACA ribonucleoprotein complex subunit 2	zma03008 Ribosome biogenesis in eukaryotes - Zea mays (maize);	IPR029064; IPR004038;	50S ribosomal protein L30e-like; Ribosomal protein L7Ae/L30e/S12e/Gadd45;
Zm00001d002395_P002	60S ribosomal protein L7-2	2.084	Up	0.00166267	cytoplasm	K02937	RP-L7e; large subunit ribosomal protein L7e	zma03010 Ribosome - Zea mays (maize);	IPR012988; IPR016082;	Ribosomal protein L30, N-terminal; Ribosomal protein L30, ferredoxin-like fold domain;
Zm00001d045430_P001	ATP-dependent Clp protease proteolytic subunit	2.082	Up	0.00071592	chloroplast	K01358			IPR029045;	ClpP/crotonase-like domain;
Zm00001d008218_P005	Coatomer subunit beta	2.079	Up	0.00022161	nucleus	K17301			IPR011710; IPR011989; IPR029446; IPR016024; IPR002553;	Coatomer beta subunit, C-terminal; Armadillo-like helical; Coatomer beta subunit, appendage platform domain; Armadillo-type fold; Clathrin/coatomer adaptor, adaptin-like, N-terminal;
Zm00001d044662_P001	ZHD9 ZF-HD type transcription factor	2.074	Up	0.0102035	chloroplast				IPR006456;	ZF-HD homeobox protein, Cys/His-rich dimerisation domain;
Zm00001d029814_P001	Xyloglucan endotransglucosylase/hydrolase protein 32	2.074	Up	0.040418	chloroplast	K08235			IPR010713; IPR013320; IPR000757;	Xyloglucan endo-transglycosylase, C-terminal; Concanavalin A-like lectin/glucanase domain; Glycoside hydrolase family 16;
Zm00001d013914_P001	Membrane steroid-binding protein 1	2.068	Up	0.00042176	chloroplast	K17278			IPR001199;	Cytochrome b5-like heme/steroid binding domain;
Zm00001d028012_P001	Ras-related protein Rab-6A	2.065	Up	0.0101831	chloroplast	K07893			IPR027417; IPR013684;	P-loop containing nucleoside triphosphate hydrolase; Mitochondrial Rho-like;
Zm00001d047713_P002	Eukaryotic translation initiation factor 2 subunit alpha	2.056	Up	0.0120422	cytoplasm	K03237	EIF2S1; translation initiation factor 2 subunit 1	zma04141 Protein processing in endoplasmic reticulum - Zea mays (maize); zma03013 RNA transport - Zea mays (maize);	IPR024054; IPR012340; IPR003029; IPR022967; IPR024055;	Translation initiation factor 2, alpha subunit, middle domain; Nucleic acid-binding, OB-fold; S1 domain; RNA-binding domain, S1; Translation initiation factor 2, alpha subunit, C-terminal;
Zm00001d028668_P001	phosphoinositide binding	2.055	Up	3.7933e-05	nucleus	K13125			IPR001841; IPR013083; IPR031790; IPR027799;	Zinc finger, RING-type; Zinc finger, RING/FYVE/PHD-type; Nitric oxide synthase-interacting protein, zinc-finger; Replication termination factor 2, RING-finger;
Zm00001d018440_P003	casein kinase I	2.055	Up	0.0097155	nucleus	K08960			IPR000719; IPR011009;	Protein kinase domain; Protein kinase-like domain;
Zm00001d028815_P001	Pathogenesis-related protein	2.054	Up	0.00044237	cytoplasm				IPR023393; IPR000916;	START-like domain; Bet v I/Major latex protein;
Zm00001d010590_P001	Outer membrane OMP85 family protein	2.052	Up	1.79317e-05	nucleus,plasma membrane	K07277			IPR000184;	Bacterial surface antigen (D15);
Zm00001d021596_P004	adenosine 5'-phosphosulfate reductase-like1 GN= aprl1	2.052	Up	0.0017788	chloroplast	K05907	APR; adenylyl-sulfate reductase (glutathione) [EC:1.8.4.9]	zma00920 Sulfur metabolism - Zea mays (maize);	IPR014729; IPR002500; IPR013766; IPR012336;	Rossmann-like alpha/beta/alpha sandwich fold; Phosphoadenosine phosphosulphate reductase; Thioredoxin domain; Thioredoxin-like fold;
Zm00001d002386_P004	uncharacterized protein	2.051	Up	0.0172446	cytoplasm
Zm00001d012599_P001	protein GN=F1F0-ATPase inhibitor protein	2.051	Up	0.0050792	chloroplast
Zm00001d014019_P003	Probable eukaryotic translation initiation factor 5-2	2.047	Up	0.00081922	nucleus	K03262	EIF5; translation initiation factor 5	zma03013 RNA transport - Zea mays (maize);	IPR016189; IPR016190; IPR003307; IPR002735; IPR016024; IPR016021;	Translation initiation factor IF2/IF5, N-terminal; Translation initiation factor IF2/IF5, zinc-binding; W2 domain; Translation initiation factor IF2/IF5; Armadillo-type fold; MIF4G-like domain;
Zm00001d035492_P010	IQ-domain 3	2.043	Up	0.0152437	nucleus
Zm00001d032573_P001	Probable prolyl 4-hydroxylase 3	2.042	Up	0.0128176	chloroplast	K00472	P4HA; prolyl 4-hydroxylase [EC:1.14.11.2]	zma01100 Metabolic pathways - Zea mays (maize); zma00330 Arginine and proline metabolism - Zea mays (maize);	IPR006620; IPR005123;	Prolyl 4-hydroxylase, alpha subunit; Oxoglutarate/iron-dependent dioxygenase;
Zm00001d009653_P009	60S acidic ribosomal protein P2A	2.041	Up	0.027102	chloroplast	K02943	RP-LP2; large subunit ribosomal protein LP2	zma03010 Ribosome - Zea mays (maize);
Zm00001d005065_P003	BcpLH protein	2.04	Up	0.000122292	chloroplast				IPR014720;	Double-stranded RNA-binding domain;
Zm00001d037732_P002	60S ribosomal protein L17-2	2.039	Up	0.010301	nucleus	K02880	RP-L17e; large subunit ribosomal protein L17e	zma03010 Ribosome - Zea mays (maize);
Zm00001d038839_P002	NADH dehydrogenase [ubiquinone] 1 beta subcomplex subunit 2	2.033	Up	8.1094e-05	nucleus
Zm00001d026020_P003	Protein MULTIPLE CHLOROPLAST DIVISION SITE 1	2.032	Up	0.00076466	nucleus
Zm00001d014121_P001	Ent-cassadiene C2-hydroxylase	2.031	Up	0.0072001	chloroplast
Zm00001d046369_P002	Serine/threonine-protein phosphatase	2.03	Up	0.027999	cytoplasm	K04382	PPP2C; serine/threonine-protein phosphatase 2A catalytic subunit [EC:3.1.3.16]	zma03015 mRNA surveillance pathway - Zea mays (maize); zma04136 Autophagy - other - Zea mays (maize);	IPR029052; IPR004843; IPR006186;	Metallo-dependent phosphatase-like; Calcineurin-like phosphoesterase domain, ApaH type; Serine/threonine-specific protein phosphatase/bis(5-nucleosyl)-tetraphosphatase;
Zm00001d009476_P002	Probable ribosomal protein S11 mitochondrial	2.03	Up	0.0129571	chloroplast	K02948	RP-S11; small subunit ribosomal protein S11	zma03010 Ribosome - Zea mays (maize);
Zm00001d006041_P038	Proton pump-interactor 1	2.029	Up	0.0040957	nucleus
Zm00001d020237_P001	Metallo-hydrolase/oxidoreductase superfamily protein	2.024	Up	0.0126391	chloroplast				IPR001279;	Metallo-beta-lactamase;
Zm00001d036401_P001	Endoplasmin homolog	2.02	Up	0.0035154	endoplasmic reticulum	K09487	HSP90B; heat shock protein 90kDa beta	zma04626 Plant-pathogen interaction - Zea mays (maize); zma04141 Protein processing in endoplasmic reticulum - Zea mays (maize);	IPR020575; IPR020568; IPR003594;	Heat shock protein Hsp90, N-terminal; Ribosomal protein S5 domain 2-type fold; Histidine kinase-like ATPase, C-terminal domain;
Zm00001d002325_P001	uncharacterized protein	2.017	Up	0.0087028	Golgi apparatus	K20283
Zm00001d013522_P001	14-dihydroxy-2-naphthoyl-CoA thioesterase 1	2.016	Up	0.033802	cytoplasm	K19222	menI; 1,4-dihydroxy-2-naphthoyl-CoA hydrolase [EC:3.1.2.28]	zma01110 Biosynthesis of secondary metabolites - Zea mays (maize); zma01100 Metabolic pathways - Zea mays (maize); zma00130 Ubiquinone and other terpenoid-quinone biosynthesis - Zea mays (maize);	IPR006683; IPR003736; IPR029069;	Thioesterase domain; Phenylacetic acid degradation-related domain; HotDog domain;
Zm00001d043674_P001	Cytidine deaminase	2.014	Up	0.0028573	cytoplasm	K01489	cdd; cytidine deaminase [EC:3.5.4.5]	zma00240 Pyrimidine metabolism - Zea mays (maize); zma01100 Metabolic pathways - Zea mays (maize);	IPR016193; IPR002125; IPR005735; IPR013171;	Cytidine deaminase-like; Cytidine and deoxycytidylate deaminases, zinc-binding; Zinc finger, LSD1-type; Cytidine/deoxycytidylate deaminase, zinc-binding domain;
Zm00001d005594_P001	Sugar transport protein 14	2.013	Up	3.7319e-05	plasma membrane				IPR020846;	Major facilitator superfamily domain;
Zm00001d044615_P004	"ribosomal protein L10 homolog endosperm cDNA 5C01D03 (uaz198), similar to yeast acidic ribosomal protein GN= rpl10"	2.01	Up	0.00069557	cytoplasm	K14815
Zm00001d017275_P001	phenylalanine ammonia lyase9 GN= pal9	2.009	Up	0.00040353	chloroplast	K10775	PAL; phenylalanine ammonia-lyase [EC:4.3.1.24]	zma00940 Phenylpropanoid biosynthesis - Zea mays (maize); zma01110 Biosynthesis of secondary metabolites - Zea mays (maize); zma01100 Metabolic pathways - Zea mays (maize); zma00360 Phenylalanine metabolism - Zea mays (maize);	IPR024083; IPR008948; IPR023144;	Fumarase/histidase, N-terminal; L-Aspartase-like; Phenylalanine ammonia-lyase, shielding domain;
Zm00001d013276_P016	Myosin-12	2.008	Up	0.0063837	chloroplast	K10357			IPR002710; IPR027417; IPR001609;	Dilute domain; P-loop containing nucleoside triphosphate hydrolase; Myosin head, motor domain;
Zm00001d027293_P010	signal recognition particle protein subunit 9 GN= spr9	2.006	Up	0.00021889	chloroplast	K13431	SRPR; signal recognition particle receptor subunit alpha	zma03060 Protein export - Zea mays (maize);	IPR003593; IPR007222; IPR013822; IPR027417; IPR000897; IPR011012;	AAA+ ATPase domain; Signal recognition particle receptor, alpha subunit, N-terminal; Signal recognition particle, SRP54 subunit, helical bundle; P-loop containing nucleoside triphosphate hydrolase; Signal recognition particle, SRP54 subunit, GTPase domain; Longin-like domain;
Zm00001d005062_P003	Vacuolar-sorting receptor 1	2.006	Up	0.00038238	plasma membrane				IPR003137; IPR001881;	PA domain; EGF-like calcium-binding domain;
Zm00001d002141_P023	UBP1-associated protein 2A	2.004	Up	0.049862	nucleus	K12741	HNRNPA1_3; heterogeneous nuclear ribonucleoprotein A1/A3	zma03040 Spliceosome - Zea mays (maize);	IPR000504; IPR012677;	RNA recognition motif domain; Nucleotide-binding alpha-beta plait domain;
Zm00001d009542_P002	Golgin candidate 5	2.004	Up	0.0056389	nucleus	K20286
Zm00001d042768_P001	Hevamine-A	1.997	Up	0.049123	chloroplast	K01183	E3.2.1.14; chitinase [EC:3.2.1.14]	zma00520 Amino sugar and nucleotide sugar metabolism - Zea mays (maize); zma01100 Metabolic pathways - Zea mays (maize);	IPR001223; IPR017853; IPR013781;	Glycoside hydrolase family 18, catalytic domain; Glycoside hydrolase superfamily; Glycoside hydrolase, catalytic domain;
Zm00001d039365_P001	Protein transport protein SEC13 homolog B	1.996	Up	0.0052796	chloroplast	K14004	SEC13; protein transport protein SEC13	zma04141 Protein processing in endoplasmic reticulum - Zea mays (maize); zma03013 RNA transport - Zea mays (maize);	IPR017986; IPR015943;	WD40-repeat-containing domain; WD40/YVTN repeat-like-containing domain;
Zm00001d047780_P014	ABC transporter B family member 6	1.993	Up	0.00121596	plasma membrane	K05658	ABCB1; ATP-binding cassette, subfamily B (MDR/TAP), member 1 [EC:7.6.2.2]	zma02010 ABC transporters - Zea mays (maize);	IPR003593; IPR003439; IPR011527; IPR027417;	AAA+ ATPase domain; ABC transporter-like; ABC transporter type 1, transmembrane domain; P-loop containing nucleoside triphosphate hydrolase;
Zm00001d015204_P001	50S ribosomal protein L3-1 chloroplastic	1.989	Up	0.00050273	chloroplast	K02906	RP-L3; large subunit ribosomal protein L3	zma03010 Ribosome - Zea mays (maize);	IPR009000;	Translation protein, beta-barrel domain;
Zm00001d001814_P001	Clathrin light chain 2	1.983	Up	0.0121365	nucleus
Zm00001d006147_P009	Ankyrin repeat family protein	1.981	Up	0.00162189	plasma membrane				IPR026961; IPR020683;	PGG domain; Ankyrin repeat-containing domain;
Zm00001d043843_P002	Splicing factor SF3a60 homolog	1.977	Up	0.0069353	cytoplasm	K12827	SF3A3; splicing factor 3A subunit 3	zma03040 Spliceosome - Zea mays (maize);	IPR021966; IPR000690; IPR031774; IPR024598;	Splicing factor SF3a60 binding domain; Zinc finger, C2H2-type matrin; SF3A3 domain; Domain of unknown function DUF3449;
Zm00001d028651_P001	?? cDNA clone pZmL1032 (cultivar Berkeley Fast) hybridizes to mRNA with very late anaerobic accumulation GN= wusl1032	1.976	Up	0.0026353	chloroplast				IPR002902;	Gnk2-homologous domain;
Zm00001d016770_P004	Exosome complex component RRP45B	1.975	Up	0.00029836	cytoplasm	K03678	RRP45; exosome complex component RRP45	zma03018 RNA degradation - Zea mays (maize);	IPR015847; IPR001247; IPR020568; IPR027408;	Exoribonuclease, phosphorolytic domain 2; Exoribonuclease, phosphorolytic domain 1; Ribosomal protein S5 domain 2-type fold; PNPase/RNase PH domain;
Zm00001d038874_P002	Probable polygalacturonase	1.974	Up	0.00095724	chloroplast				IPR011050; IPR012334;	Pectin lyase fold/virulence factor; Pectin lyase fold;
Zm00001d048689_P034	AAA-type ATPase family protein	1.973	Up	0.028895	chloroplast				IPR003593; IPR003959; IPR008984; IPR027417; IPR000253;	AAA+ ATPase domain; ATPase, AAA-type, core; SMAD/FHA domain; P-loop containing nucleoside triphosphate hydrolase; Forkhead-associated (FHA) domain;
Zm00001d037929_P002	40S ribosomal protein S5-2	1.971	Up	0.0030006	cytoskeleton	K02989	RP-S5e; small subunit ribosomal protein S5e	zma03010 Ribosome - Zea mays (maize);	IPR023798;	Ribosomal protein S7 domain;
Zm00001d030011_P001	Eukaryotic translation initiation factor 3 subunit B	1.97	Up	2.1265e-05	cytoplasm	K03253	EIF3B; translation initiation factor 3 subunit B	zma03013 RNA transport - Zea mays (maize);	IPR000504; IPR013979; IPR012677; IPR015943; IPR011042; IPR034363;	RNA recognition motif domain; Translation initiation factor, beta propellor-like domain; Nucleotide-binding alpha-beta plait domain; WD40/YVTN repeat-like-containing domain; Six-bladed beta-propeller, TolB-like; eIF3B, RNA recognition motif;
Zm00001d009480_P001	Receptor for activated C kinase 1A	1.969	Up	0.0143019	cytoplasm	K14753			IPR017986; IPR015943;	WD40-repeat-containing domain; WD40/YVTN repeat-like-containing domain;
Zm00001d053001_P001	Eukaryotic aspartyl protease family protein	1.967	Up	0.0053806	chloroplast				IPR032799; IPR033121; IPR021109; IPR032861; IPR034161;	Xylanase inhibitor, C-terminal; Peptidase family A1 domain; Aspartic peptidase domain; Xylanase inhibitor, N-terminal; Pepsin-like domain, plant;
Zm00001d051693_P001	Aspartyl protease AED1	1.966	Up	0.036479	nucleus				IPR032799; IPR033121; IPR021109; IPR032861;	Xylanase inhibitor, C-terminal; Peptidase family A1 domain; Aspartic peptidase domain; Xylanase inhibitor, N-terminal;
Zm00001d006388_P004	Ribosomal protein L15	1.962	Up	0.0095162	chloroplast	K02877	RP-L15e; large subunit ribosomal protein L15e	zma03010 Ribosome - Zea mays (maize);	IPR012678; IPR024794;	Ribosomal protein L23/L15e core domain; Ribosomal protein L15e core domain;
Zm00001d039860_P001	E3 ubiquitin-protein ligase PRT6	1.959	Up	0.0146192	nucleus				IPR011991; IPR013083; IPR003126;	Winged helix-turn-helix DNA-binding domain; Zinc finger, RING/FYVE/PHD-type; Zinc finger, UBR-type;
Zm00001d040010_P003	uncharacterized protein	1.959	Up	0.0185217	nucleus
Zm00001d018977_P051	Cytosine-specific methyltransferase	1.958	Up	0.0045024	chloroplast	K00558	DNMT1; DNA (cytosine-5)-methyltransferase 1 [EC:2.1.1.37]	zma01100 Metabolic pathways - Zea mays (maize); zma00270 Cysteine and methionine metabolism - Zea mays (maize);	IPR029063; IPR022702; IPR001025;	S-adenosyl-L-methionine-dependent methyltransferase; DNA (cytosine-5)-methyltransferase 1, replication foci domain; Bromo adjacent homology (BAH) domain;
Zm00001d011565_P003	Putative ubiquitin-conjugating enzyme family%3B Ubiquitin-conjugating enzyme E2 N	1.953	Up	0.029918	mitochondria	K10580	UBE2N; ubiquitin-conjugating enzyme E2 N [EC:2.3.2.23]	zma04120 Ubiquitin mediated proteolysis - Zea mays (maize);	IPR016135; IPR000608;	Ubiquitin-conjugating enzyme/RWD-like; Ubiquitin-conjugating enzyme E2;
Zm00001d016708_P002	Beta-fructofuranosidase%2C cell wall isozyme	1.952	Up	0.00045938	chloroplast	K01193	INV; beta-fructofuranosidase [EC:3.2.1.26]	zma00052 Galactose metabolism - Zea mays (maize); zma00500 Starch and sucrose metabolism - Zea mays (maize); zma01100 Metabolic pathways - Zea mays (maize);	IPR013148; IPR023296; IPR013189; IPR013320;	Glycosyl hydrolase family 32, N-terminal; Glycosyl hydrolase, five-bladed beta-propellor domain; Glycosyl hydrolase family 32, C-terminal; Concanavalin A-like lectin/glucanase domain;
Zm00001d036801_P001	Phosphoribosylanthranilate transferase isoform 1%3B Phosphoribosylanthranilate transferase isoform 2%3B Phosphoribosylanthranilate transferase isoform 3	1.948	Up	0.0071422	plasma membrane				IPR000008; IPR013583;	C2 domain; Phosphoribosyltransferase C-terminal;
Zm00001d037263_P001	TMV response protein%3B TMV response-related protein	1.94	Up	0.00079772	chloroplast
Zm00001d040029_P002	uncharacterized protein	1.94	Up	0.00081953	mitochondria				IPR000877;	Proteinase inhibitor I12, Bowman-Birk;
Zm00001d002969_P001	ATP-dependent Clp protease proteolytic subunit 2 mitochondrial	1.939	Up	0.026519	chloroplast	K01358			IPR029045;	ClpP/crotonase-like domain;
Zm00001d011840_P001	uncharacterized protein	1.939	Up	0.000104674	endoplasmic reticulum
Zm00001d027706_P002	transducin family protein / WD-40 repeat family protein	1.938	Up	0.00022228	chloroplast	K14556	DIP2; U3 small nucleolar RNA-associated protein 12	zma03008 Ribosome biogenesis in eukaryotes - Zea mays (maize);	IPR017986; IPR015943; IPR007148;	WD40-repeat-containing domain; WD40/YVTN repeat-like-containing domain; Small-subunit processome, Utp12;
Zm00001d039263_P001	OB-fold nucleic acid binding domain containing protein	1.934	Up	0.000163099	chloroplast	K07466	RFA1; replication factor A1	zma03030 DNA replication - Zea mays (maize); zma03440 Homologous recombination - Zea mays (maize); zma03430 Mismatch repair - Zea mays (maize); zma03420 Nucleotide excision repair - Zea mays (maize);	IPR012340;	Nucleic acid-binding, OB-fold;
Zm00001d026312_P006	Gamma-soluble NSF attachment protein	1.928	Up	0.0034752	mitochondria	K21198			IPR011990;	Tetratricopeptide-like helical domain;
Zm00001d026535_P005	Protein IQ-DOMAIN 32	1.927	Up	0.029517	nucleus
Zm00001d053028_P007	Protein TPLATE	1.924	Up	0.0093788	chloroplast				IPR016024;	Armadillo-type fold;
Zm00001d012561_P003	Cystatin2%3B Cysteine proteinase inhibitor%3B Putative cystatin	1.924	Up	0.027361	chloroplast				IPR000010;	Cystatin domain;
Zm00001d028024_P001	Nodulin-related protein 1	1.922	Up	0.000100371	nucleus
Zm00001d019593_P001	Probable carbohydrate esterase	1.921	Up	0.00154339	chloroplast				IPR005181; IPR013830;	Sialate O-acetylesterase domain; SGNH hydrolase-type esterase domain;
Zm00001d007772_P004	RNA-binding (RRM/RBD/RNP motifs) family protein	1.919	Up	0.0048993	nucleus	K14411	MSI; RNA-binding protein Musashi	zma03015 mRNA surveillance pathway - Zea mays (maize);	IPR034131; IPR000504; IPR012677;	DAZ-associated protein 1, RNA recognition motif 2; RNA recognition motif domain; Nucleotide-binding alpha-beta plait domain;
Zm00001d052009_P003	MAK10 homologue	1.917	Up	0.00162327	chloroplast	K20823			IPR009068;	S15/NS1, RNA-binding;
Zm00001d045926_P002	Mitochondrial glycoprotein family protein	1.916	Up	0.021621	mitochondria	K15414
Zm00001d037452_P002	B-cell receptor-associated 31-like	1.916	Up	0.012457	chloroplast	K14009	BCAP31; B-cell receptor-associated protein 31	zma04141 Protein processing in endoplasmic reticulum - Zea mays (maize);
Zm00001d022181_P005	Phospho-2-dehydro-3-deoxyheptonate aldolase 1	1.915	Up	0.00034209	chloroplast	K01626	E2.5.1.54; 3-deoxy-7-phosphoheptulonate synthase [EC:2.5.1.54]	zma01230 Biosynthesis of amino acids - Zea mays (maize); zma01110 Biosynthesis of secondary metabolites - Zea mays (maize); zma01100 Metabolic pathways - Zea mays (maize); zma00400 Phenylalanine, tyrosine and tryptophan biosynthesis - Zea mays (maize);
Zm00001d005539_P004	Ferrochelatase	1.914	Up	0.00192426	chloroplast	K01772	hemH; protoporphyrin/coproporphyrin ferrochelatase [EC:4.99.1.1 4.99.1.9]	zma00860 Porphyrin and chlorophyll metabolism - Zea mays (maize); zma01110 Biosynthesis of secondary metabolites - Zea mays (maize); zma01100 Metabolic pathways - Zea mays (maize);	IPR033659;	Ferrochelatase, N-terminal;
Zm00001d052163_P001	Protein DCL chloroplastic	1.912	Up	0.020177	chloroplast
Zm00001d047477_P002	Nascent polypeptide-associated complex alpha subunit-like protein	1.911	Up	0.0021639	nucleus	K03626			IPR002715;	Nascent polypeptide-associated complex NAC domain;
Zm00001d014679_P001	acidic ribosomal protein P3 novel acidic phosphoprotein GN= arpp3	1.91	Up	0.00033907	chloroplast	K02942	RP-LP1; large subunit ribosomal protein LP1	zma03010 Ribosome - Zea mays (maize);
Zm00001d049558_P006	DNA topoisomerase 1 beta	1.91	Up	0.049958	cytoplasm	K03163			IPR013030; IPR008336; IPR013500; IPR014727; IPR014711; IPR011010; IPR013499; IPR025834;	DNA topoisomerase I, DNA binding, mixed alpha/beta motif, eukaryotic-type; DNA topoisomerase I, DNA binding, eukaryotic-type; DNA topoisomerase I, catalytic core, eukaryotic-type; DNA topoisomerase I, catalytic core, alpha/beta subdomain; DNA topoisomerase I, catalytic core, alpha-helical subdomain, eukaryotic-type; DNA breaking-rejoining enzyme, catalytic core; DNA topoisomerase I, eukaryotic-ty…
Zm00001d020898_P010	Heat shock protein 90-2	1.905	Up	0.00045642	nucleus	K04079	HSP90A; molecular chaperone HtpG	zma04626 Plant-pathogen interaction - Zea mays (maize); zma04141 Protein processing in endoplasmic reticulum - Zea mays (maize);	IPR020568; IPR020575; IPR003594;	Ribosomal protein S5 domain 2-type fold; Heat shock protein Hsp90, N-terminal; Histidine kinase-like ATPase, C-terminal domain;
Zm00001d049127_P001	Putative serine/threonine protein phosphatase superfamily protein	1.904	Up	0.00045953	cytoplasm				IPR029052; IPR004843;	Metallo-dependent phosphatase-like; Calcineurin-like phosphoesterase domain, ApaH type;
Zm00001d036148_P002	pentatricopeptide repeat 5 stabilizes the chloroplast unspliced trnG precursor GN= ppr5	1.903	Up	0.0039223	chloroplast				IPR009044;	ssDNA-binding transcriptional regulator;
Zm00001d037993_P002	Ran-binding protein 1 homolog a	1.902	Up	0.044198	nucleus	K15306			IPR000156; IPR011993;	Ran binding domain; PH domain-like;
Zm00001d017120_P003	"nuclear binding protein35 single copy leaf cDNA, csu598, similar to NBP35 protein GN= nbp35"	1.895	Up	0.0092775	cytoplasm				IPR027417;	P-loop containing nucleoside triphosphate hydrolase;
Zm00001d028966_P002	ELMO/CED-12 family protein	1.889	Up	0.0030807	nucleus				IPR006816;	ELMO domain;
Zm00001d033055_P002	4-coumarate--CoA ligase-like 7	1.888	Up	0.0037178	chloroplast	K01904	4CL; 4-coumarate--CoA ligase [EC:6.2.1.12]	zma00940 Phenylpropanoid biosynthesis - Zea mays (maize); zma01110 Biosynthesis of secondary metabolites - Zea mays (maize); zma01100 Metabolic pathways - Zea mays (maize); zma00130 Ubiquinone and other terpenoid-quinone biosynthesis - Zea mays (maize); zma00360 Phenylalanine metabolism - Zea mays (maize);	IPR025110; IPR000873;	AMP-binding enzyme C-terminal domain; AMP-dependent synthetase/ligase;
Zm00001d038578_P001	Mediator of RNA polymerase II transcription subunit 23	1.887	Up	0.0023552	nucleus
Zm00001d052021_P003	DNA replication licensing factor MCM5	1.886	Up	0.000196351	nucleus	K02209	MCM5; DNA replication licensing factor MCM5 [EC:3.6.4.12]	zma03030 DNA replication - Zea mays (maize);	IPR001208; IPR012340; IPR027417; IPR033762; IPR027925;	MCM domain; Nucleic acid-binding, OB-fold; P-loop containing nucleoside triphosphate hydrolase; MCM OB domain; MCM N-terminal domain;
Zm00001d029648_P001	"copalyl diphosphate synthase2 encodes ent-kaurene synthase, a copalyl diphosphate synthase protein having close identity with An1 gene product GN= cpps2"	1.886	Up	0.0038802	chloroplast	K04120	E5.5.1.13; ent-copalyl diphosphate synthase [EC:5.5.1.13]	zma00904 Diterpenoid biosynthesis - Zea mays (maize); zma01110 Biosynthesis of secondary metabolites - Zea mays (maize); zma01100 Metabolic pathways - Zea mays (maize);	IPR005630; IPR008949; IPR008930; IPR001906;	Terpene synthase, metal-binding domain; Isoprenoid synthase domain; Terpenoid cyclases/protein prenyltransferase alpha-alpha toroid; Terpene synthase, N-terminal domain;
Zm00001d050168_P001	uncharacterized protein	1.884	Up	0.00071871	chloroplast
Zm00001d051951_P006	casein kinase I	1.882	Up	0.023619	nucleus	K12608	CAF16; CCR4-NOT complex subunit CAF16	zma03018 RNA degradation - Zea mays (maize);	IPR027417;	P-loop containing nucleoside triphosphate hydrolase;
Zm00001d023218_P112	Putative clathrin heavy chain family protein	1.879	Up	0.024344	cytoplasm	K04646	CLTC; clathrin heavy chain	zma04144 Endocytosis - Zea mays (maize);	IPR016025; IPR015348; IPR011990; IPR012331; IPR016024; IPR001473;	Clathrin, heavy chain, linker/propeller domain; Clathrin, heavy chain, linker, core motif; Tetratricopeptide-like helical domain; Clathrin, heavy chain, linker; Armadillo-type fold; Clathrin, heavy chain, propeller, N-terminal;
Zm00001d048903_P001	Acidic endochitinase	1.877	Up	0.0072226	chloroplast	K01183	E3.2.1.14; chitinase [EC:3.2.1.14]	zma00520 Amino sugar and nucleotide sugar metabolism - Zea mays (maize); zma01100 Metabolic pathways - Zea mays (maize);	IPR001223; IPR017853; IPR013781;	Glycoside hydrolase family 18, catalytic domain; Glycoside hydrolase superfamily; Glycoside hydrolase, catalytic domain;
Zm00001d011705_P007	WD-40 repeat-containing protein MSI4	1.876	Up	0.0191994	nucleus	K10752			IPR022052; IPR017986; IPR015943;	Histone-binding protein RBBP4, N-terminal; WD40-repeat-containing domain; WD40/YVTN repeat-like-containing domain;
Zm00001d052209_P001	Cytokinin-O-glucosyltransferase 2	1.874	Up	0.030277	chloroplast
Zm00001d052653_P004	respiratory burst oxidase4 GN= rboh4	1.873	Up	0.0029039	plasma membrane	K13447	RBOH; respiratory burst oxidase [EC:1.6.3.- 1.11.1.-]	zma04626 Plant-pathogen interaction - Zea mays (maize); zma04016 MAPK signaling pathway - plant - Zea mays (maize);	IPR017927; IPR002048; IPR011992; IPR013130; IPR013623; IPR013121; IPR013112; IPR017938;	Ferredoxin reductase-type FAD-binding domain; EF-hand domain; EF-hand domain pair; Ferric reductase transmembrane component-like domain; NADPH oxidase Respiratory burst; Ferric reductase, NAD binding domain; FAD-binding 8; Riboflavin synthase-like beta-barrel;
Zm00001d050164_P001	Wall-associated receptor kinase-like 20	1.867	Up	0.0080001	chloroplast				IPR000719; IPR025287; IPR013320; IPR011009;	Protein kinase domain; Wall-associated receptor kinase, galacturonan-binding domain; Concanavalin A-like lectin/glucanase domain; Protein kinase-like domain;
Zm00001d013230_P001	"bentazon resistance1 recessive susceptibility to nicosulfuron (Accent) and mesotrione herbicidesDominant Ben1 resistant, with Ben2 GN= ben1"	1.865	Up	0.045797	chloroplast
Zm00001d040344_P001	UBP1-associated protein 2A	1.861	Up	0.030596	chloroplast	K12741	HNRNPA1_3; heterogeneous nuclear ribonucleoprotein A1/A3	zma03040 Spliceosome - Zea mays (maize);	IPR000504; IPR012677;	RNA recognition motif domain; Nucleotide-binding alpha-beta plait domain;
Zm00001d022275_P002	Novel plant SNARE 13	1.86	Up	0.0048432	nucleus	K08494			IPR000727;	Target SNARE coiled-coil homology domain;
Zm00001d031310_P001	Nuclear transcription factor Y subunit C-2	1.859	Up	0.00336	nucleus	K08066			IPR003958; IPR009072;	Transcription factor CBF/NF-Y/archaeal histone domain; Histone-fold;
Zm00001d049553_P001	Vesicle-associated protein 1-1	1.858	Up	0.0194026	nucleus				IPR008962; IPR000535;	PapD-like; Major sperm protein (MSP) domain;
Zm00001d042525_P009	"60S ribosomal protein L5-1 homolog a endosperm cDNA 5C05D11 (uaz189), similar to ribosomal protein GN= rpl5a"	1.858	Up	0.00031731	cytoplasm	K02932	RP-L5e; large subunit ribosomal protein L5e	zma03010 Ribosome - Zea mays (maize);	IPR025607;	Ribosomal protein L5 eukaryotic/L18 archaeal, C-terminal;
Zm00001d034608_P003	Protein kinase superfamily protein	1.852	Up	0.0026414	nucleus				IPR000719; IPR001245; IPR011009;	Protein kinase domain; Serine-threonine/tyrosine-protein kinase catalytic domain; Protein kinase-like domain;
Zm00001d012536_P005	Vacuolar protein sorting-associated protein 36	1.848	Up	0.031418	cytoplasm	K12190	VPS36; ESCRT-II complex subunit VPS36	zma04144 Endocytosis - Zea mays (maize);	IPR011991;	Winged helix-turn-helix DNA-binding domain;
Zm00001d017381_P001	(+)-neomenthol dehydrogenase	1.848	Up	0.0017768	cytoplasm	K15095	E1.1.1.208; (+)-neomenthol dehydrogenase [EC:1.1.1.208]	zma01110 Biosynthesis of secondary metabolites - Zea mays (maize); zma00902 Monoterpenoid biosynthesis - Zea mays (maize);	IPR016040;	NAD(P)-binding domain;
Zm00001d012101_P005	E3 ubiquitin-protein ligase RGLG1	1.847	Up	0.0077969	nucleus	K16280			IPR010734; IPR002035;	Copine; von Willebrand factor, type A;
Zm00001d043224_P001	protein GN=F1F0-ATPase inhibitor protein	1.844	Up	0.0024202	mitochondria
Zm00001d010887_P008	Serine/threonine-protein phosphatase BSL1	1.843	Up	0.022259	endoplasmic reticulum	K01090			IPR029052; IPR004843; IPR015915; IPR006186;	Metallo-dependent phosphatase-like; Calcineurin-like phosphoesterase domain, ApaH type; Kelch-type beta propeller; Serine/threonine-specific protein phosphatase/bis(5-nucleosyl)-tetraphosphatase;
Zm00001d045420_P001	Root cap-specific protein	1.843	Up	0.0026582	cytoplasm	K01711	gmd; GDPmannose 4,6-dehydratase [EC:4.2.1.47]	zma00520 Amino sugar and nucleotide sugar metabolism - Zea mays (maize); zma01100 Metabolic pathways - Zea mays (maize); zma00051 Fructose and mannose metabolism - Zea mays (maize);	IPR016040;	NAD(P)-binding domain;
Zm00001d002287_P001	LRR receptor-like serine/threonine-protein kinase FLS2	1.842	Up	0.00097687	chloroplast	K13420	FLS2; LRR receptor-like serine/threonine-protein kinase FLS2 [EC:2.7.11.1]	zma04626 Plant-pathogen interaction - Zea mays (maize); zma04016 MAPK signaling pathway - plant - Zea mays (maize);	IPR000719; IPR013210; IPR032675; IPR013320; IPR011009;	Protein kinase domain; Leucine-rich repeat-containing N-terminal, plant-type; Leucine-rich repeat domain, L domain-like; Concanavalin A-like lectin/glucanase domain; Protein kinase-like domain;
Zm00001d028695_P005	Protein MODIFIER OF SNC1 11	1.837	Up	0.0025234	nucleus	K18732
Zm00001d034097_P001	cytochrome P450 family 81 subfamily D polypeptide 8	1.837	Up	0.0133384	chloroplast
Zm00001d029853_P001	Proline oxidase	1.837	Up	0.0047843	chloroplast	K00318	PRODH; proline dehydrogenase [EC:1.5.-.-]	zma01110 Biosynthesis of secondary metabolites - Zea mays (maize); zma01100 Metabolic pathways - Zea mays (maize); zma00330 Arginine and proline metabolism - Zea mays (maize);	IPR002872; IPR029041;	Proline dehydrogenase domain; FAD-linked oxidoreductase-like;
Zm00001d007232_P001	dentin sialophosphoprotein-related	1.836	Up	0.00022421	nucleus				IPR000313;	PWWP domain;
Zm00001d052450_P002	Pentatricopeptide repeat-containing protein	1.835	Up	0.000136009	chloroplast
Zm00001d029539_P002	PLASMODESMATA CALLOSE-BINDING PROTEIN 2	1.833	Up	0.00031645	vacuolar membrane				IPR012946;	X8 domain;
Zm00001d028630_P005	Heat shock cognate 70 kDa protein 2	1.832	Up	0.0097242	cytoplasm	K03283	HSPA1s; heat shock 70kDa protein 1/2/6/8	zma04144 Endocytosis - Zea mays (maize); zma03040 Spliceosome - Zea mays (maize); zma04141 Protein processing in endoplasmic reticulum - Zea mays (maize);	IPR029048; IPR029047;	Heat shock protein 70kD, C-terminal domain; Heat shock protein 70kD, peptide-binding domain;
Zm00001d020810_P003	S-adenosyl-L-methionine-dependent methyltransferases superfamily protein	1.832	Up	6.0024e-05	chloroplast	K15334			IPR001678; IPR029063;	SAM-dependent methyltransferase RsmB/NOP2-type; S-adenosyl-L-methionine-dependent methyltransferase;
Zm00001d034514_P001	Germin-like protein subfamily T member 1	1.83	Up	0.0163564	chloroplast				IPR011051; IPR006045; IPR014710;	RmlC-like cupin domain; Cupin 1; RmlC-like jelly roll fold;
Zm00001d013787_P004	Secretory carrier-associated membrane protein 3	1.83	Up	0.03224	chloroplast	K19995
Zm00001d003712_P001	abscisic acid stress ripening3 GN= aasr3	1.828	Up	0.00050441	nucleus
Zm00001d051427_P008	high mobility group protein3 GN= hmg3	1.828	Up	0.0041442	nucleus	K11296			IPR009071;	High mobility group box domain;
Zm00001d049712_P014	RNA binding GN=nucleic acid binding	1.828	Up	0.0154955	nucleus	K12839	SMNDC1; survival of motor neuron-related-splicing factor 30	zma03040 Spliceosome - Zea mays (maize);
Zm00001d033457_P001	Tubulin beta-3 chain	1.827	Up	0.0033418	nucleus	K07375	TUBB; tubulin beta	zma04145 Phagosome - Zea mays (maize);	IPR003008; IPR023123; IPR008280; IPR018316;	Tubulin/FtsZ, GTPase domain; Tubulin, C-terminal; Tubulin/FtsZ, C-terminal; Tubulin/FtsZ, 2-layer sandwich domain;
Zm00001d019473_P001	60S ribosomal protein L8-3	1.821	Up	0.0067569	cytoplasm	K02938	RP-L8e; large subunit ribosomal protein L8e	zma03010 Ribosome - Zea mays (maize);	IPR008991; IPR012340; IPR022669; IPR014726; IPR022666; IPR014722;	Translation protein SH3-like domain; Nucleic acid-binding, OB-fold; Ribosomal protein L2, C-terminal; Ribosomal protein L2, domain 3; Ribosomal Proteins L2, RNA binding domain; Ribosomal protein L2 domain 2;
Zm00001d029844_P001	Late embryogenesis abundant (LEA) hydroxyproline-rich glycoprotein family	1.82	Up	0.00186338	chloroplast				IPR004864;	Late embryogenesis abundant protein, LEA-14;
Zm00001d018344_P001	receptor like protein 57	1.82	Up	0.030959	extracellular				IPR032675;	Leucine-rich repeat domain, L domain-like;
Zm00001d018220_P001	glutathione transferase24 GN= gst24	1.816	Up	0.0168159	chloroplast	K00799	GST; glutathione S-transferase [EC:2.5.1.18]	zma00480 Glutathione metabolism - Zea mays (maize);	IPR004046; IPR010987; IPR012336; IPR004045;	Glutathione S-transferase, C-terminal; Glutathione S-transferase, C-terminal-like; Thioredoxin-like fold; Glutathione S-transferase, N-terminal;
Zm00001d041606_P013	minichromosome maintenance2 a cell cycle gene regulated by tb1 GN= mcm2	1.814	Up	0.028336	nucleus	K02210	MCM7; DNA replication licensing factor MCM7 [EC:3.6.4.12]	zma03030 DNA replication - Zea mays (maize);	IPR001208; IPR027417;	MCM domain; P-loop containing nucleoside triphosphate hydrolase;
Zm00001d037092_P003	terpene synthase26 orthologous to stc1 but function in insect herbivory not clear GN= tps26	1.814	Up	0.00145832	chloroplast				IPR005630; IPR008949; IPR008930; IPR001906;	Terpene synthase, metal-binding domain; Isoprenoid synthase domain; Terpenoid cyclases/protein prenyltransferase alpha-alpha toroid; Terpene synthase, N-terminal domain;
Zm00001d018337_P001	60S ribosome subunit biogenesis protein NIP7 homolog	1.81	Up	0.033025	cytoplasm	K07565			IPR015947; IPR002478;	PUA-like domain; PUA domain;
Zm00001d006336_P001	uncharacterized protein	1.805	Up	7.9282e-05	mitochondria
Zm00001d007496_P001	Lymphoid organ expressed yellow head virus receptor protein	1.804	Up	0.0015566	cytoplasm				IPR027329;	TPX2, C-terminal;
Zm00001d043727_P001	farnesyl diphosphate synthase3 terpene based defense (Richter et al 2015) GN= fps3	1.801	Up	0.0184566	cytoplasm	K00787	FDPS; farnesyl diphosphate synthase [EC:2.5.1.1 2.5.1.10]	zma00900 Terpenoid backbone biosynthesis - Zea mays (maize); zma01110 Biosynthesis of secondary metabolites - Zea mays (maize); zma01100 Metabolic pathways - Zea mays (maize);	IPR008949;	Isoprenoid synthase domain;
Zm00001d040599_P001	Quinolinate synthase chloroplastic	1.801	Up	0.0094242	cytoplasm	K03517	nadA; quinolinate synthase [EC:2.5.1.72]	zma01100 Metabolic pathways - Zea mays (maize); zma00760 Nicotinate and nicotinamide metabolism - Zea mays (maize);
Zm00001d010954_P001	Metal tolerance protein A2	1.8	Up	3.956e-05	plasma membrane	K14689			IPR027469;	Cation efflux protein transmembrane domain;
Zm00001d017239_P001	RAN GTPase-activating protein 2	1.799	Up	0.00192295	chloroplast	K14319	RANGAP1; Ran GTPase-activating protein 1	zma03013 RNA transport - Zea mays (maize);	IPR032675; IPR025265;	Leucine-rich repeat domain, L domain-like; WPP domain;
Zm00001d046221_P050	ATP/GTP-binding protein family	1.798	Up	0.00060321	nucleus				IPR011992; IPR002048; IPR025954;	EF-hand domain pair; EF-hand domain; DBC1/CARP1 catalytically inactive NUDIX hydrolase domain;
Zm00001d028369_P001	hydroxyproline-rich glycoprotein family protein	1.796	Up	1.78797e-05	nucleus				IPR027450;	Alpha-ketoglutarate-dependent dioxygenase AlkB-like;
Zm00001d016077_P007	Sec20 family protein	1.791	Up	0.046222	chloroplast	K08497	SEC20; protein transport protein SEC20	zma04130 SNARE interactions in vesicular transport - Zea mays (maize);
Zm00001d052286_P003	uncharacterized protein	1.79	Up	0.00100296	chloroplast
Zm00001d013159_P004	alpha tubulin3 alpha tubulin family GN= tua3	1.789	Up	0.0025818	cytoplasm	K07374	TUBA; tubulin alpha	zma04145 Phagosome - Zea mays (maize);	IPR003008; IPR023123; IPR008280; IPR018316;	Tubulin/FtsZ, GTPase domain; Tubulin, C-terminal; Tubulin/FtsZ, C-terminal; Tubulin/FtsZ, 2-layer sandwich domain;
Zm00001d013862_P001	Cytochrome P450 84A1	1.783	Up	0.0094445	chloroplast	K09755	CYP84A; ferulate-5-hydroxylase [EC:1.14.-.-]	zma00940 Phenylpropanoid biosynthesis - Zea mays (maize); zma01110 Biosynthesis of secondary metabolites - Zea mays (maize); zma01100 Metabolic pathways - Zea mays (maize);
Zm00001d002325_P002	uncharacterized protein	1.781	Up	0.00067512	cytoplasm	K20283
Zm00001d013290_P002	Transmembrane emp24 domain-containing protein p24beta3	1.778	Up	0.0158175	cytoplasm	K20347			IPR009038;	GOLD domain;
Zm00001d029744_P001	flavone synthase typeI1 Encodes a flavone synthase that is of the soluble Fe2+/2- oxoglutarate-dependent dioxygenase class GN= fnsi1	1.777	Up	0.00043967	cytoplasm				IPR027443; IPR005123; IPR026992;	Isopenicillin N synthase-like; Oxoglutarate/iron-dependent dioxygenase; Non-haem dioxygenase N-terminal domain;
Zm00001d021392_P001	Transmembrane 9 superfamily member 9	1.776	Up	0.043439	plasma membrane	K17086			IPR020846;	Major facilitator superfamily domain;
Zm00001d021960_P001	ZCW7	1.775	Up	0.027098	chloroplast				IPR012677;	Nucleotide-binding alpha-beta plait domain;
Zm00001d048771_P001	Putative polyol transporter 1	1.773	Up	0.00031731	vacuolar membrane				IPR020846;	Major facilitator superfamily domain;
Zm00001d022237_P001	"RNA binding protein 1 leaf cDNA csu17, similar to RNA binding proteins GN= rnp1"	1.771	Up	0.0029368	chloroplast	K11294			IPR000504; IPR012677;	RNA recognition motif domain; Nucleotide-binding alpha-beta plait domain;
Zm00001d014280_P003	RNA-binding (RRM/RBD/RNP motifs) family protein	1.771	Up	0.0178375	nucleus
Zm00001d012425_P001	Ribosomal protein L17 family protein	1.77	Up	0.000104666	chloroplast	K02879	RP-L17; large subunit ribosomal protein L17	zma03010 Ribosome - Zea mays (maize);
Zm00001d002898_P001	Peroxidase 12	1.77	Up	0.0019046	vacuolar membrane	K00430	E1.11.1.7; peroxidase [EC:1.11.1.7]	zma00940 Phenylpropanoid biosynthesis - Zea mays (maize); zma01110 Biosynthesis of secondary metabolites - Zea mays (maize); zma01100 Metabolic pathways - Zea mays (maize);	IPR033905; IPR002016;	Secretory peroxidase; Haem peroxidase, plant/fungal/bacterial;
Zm00001d036359_P004	Transducin/WD40 repeat-like superfamily protein	1.769	Up	0.00036339	nucleus	K14768			IPR012952; IPR017986; IPR015943;	BING4, C-terminal domain; WD40-repeat-containing domain; WD40/YVTN repeat-like-containing domain;
Zm00001d028586_P010	Protein TOC75-3 chloroplastic	1.769	Up	0.0149603	mitochondria				IPR000184;	Bacterial surface antigen (D15);
Zm00001d032476_P001	Probable methyltransferase PMT18	1.764	Up	6.2986e-05	cytoplasm				IPR029063;	S-adenosyl-L-methionine-dependent methyltransferase;
Zm00001d014737_P001	Arogenate dehydrogenase 1 chloroplastic	1.763	Up	0.0044845	chloroplast	K15227	TYRAAT; arogenate dehydrogenase (NADP+), plant [EC:1.3.1.78]	zma01230 Biosynthesis of amino acids - Zea mays (maize); zma01110 Biosynthesis of secondary metabolites - Zea mays (maize); zma01100 Metabolic pathways - Zea mays (maize); zma00400 Phenylalanine, tyrosine and tryptophan biosynthesis - Zea mays (maize);	IPR003099; IPR008927; IPR016040;	Prephenate dehydrogenase; 6-phosphogluconate dehydrogenase C-terminal domain-like; NAD(P)-binding domain;
Zm00001d002028_P001	Protein FATTY ACID EXPORT 2 chloroplastic	1.761	Up	0.033615	chloroplast
Zm00001d012728_P001	Putative DUF1421 domain family protein	1.761	Up	0.0154641	nucleus
Zm00001d018965_P001	Xylanase inhibitor protein 1	1.76	Up	0.0004363	chloroplast	K01183	E3.2.1.14; chitinase [EC:3.2.1.14]	zma00520 Amino sugar and nucleotide sugar metabolism - Zea mays (maize); zma01100 Metabolic pathways - Zea mays (maize);	IPR017853; IPR013781;	Glycoside hydrolase superfamily; Glycoside hydrolase, catalytic domain;
Zm00001d036827_P002	Microtubule-associated protein MAP65-1a	1.759	Up	0.0094208	chloroplast	K16732			IPR032799; IPR033873; IPR021109; IPR033121; IPR032861;	Xylanase inhibitor, C-terminal; CND41-like; Aspartic peptidase domain; Peptidase family A1 domain; Xylanase inhibitor, N-terminal;
Zm00001d019648_P002	RNA-binding protein CP31B chloroplastic	1.759	Up	0.0022244	chloroplast				IPR000504; IPR012677;	RNA recognition motif domain; Nucleotide-binding alpha-beta plait domain;
Zm00001d036046_P001	Magnesium protoporphyrin IX methyltransferase chloroplastic	1.758	Up	0.0157576	chloroplast	K03428	bchM; magnesium-protoporphyrin O-methyltransferase [EC:2.1.1.11]	zma00860 Porphyrin and chlorophyll metabolism - Zea mays (maize); zma01110 Biosynthesis of secondary metabolites - Zea mays (maize); zma01100 Metabolic pathways - Zea mays (maize);	IPR029063; IPR010940;	S-adenosyl-L-methionine-dependent methyltransferase; Magnesium-protoporphyrin IX methyltransferase, C-terminal;
Zm00001d018896_P004	evolutionarily conserved C-terminal region 2	1.756	Up	0.024599	nucleus				IPR007275;	YTH domain;
Zm00001d014533_P002	RNA-binding (RRM/RBD/RNP motifs) family protein	1.754	Up	0.00022258	nucleus				IPR000504; IPR012677;	RNA recognition motif domain; Nucleotide-binding alpha-beta plait domain;
Zm00001d009463_P001	Haloacid dehalogenase-like hydrolase (HAD) superfamily protein	1.752	Up	0.036221	cytoplasm				IPR023214;	HAD-like domain;
Zm00001d040027_P002	uncharacterized protein	1.75	Up	0.00096056	extracellular				IPR000877;	Proteinase inhibitor I12, Bowman-Birk;
Zm00001d020702_P001	Mitochondrial phosphate carrier protein 2 mitochondrial	1.748	Up	0.0044363	chloroplast	K15102			IPR023395;	Mitochondrial carrier domain;
Zm00001d038023_P001	Putative WRKY DNA-binding domain superfamily protein	1.748	Up	0.0114843	nucleus	K13424	WRKY33; WRKY transcription factor 33	zma04626 Plant-pathogen interaction - Zea mays (maize); zma04016 MAPK signaling pathway - plant - Zea mays (maize);	IPR003657;	WRKY domain;
Zm00001d001960_P002	Naringenin2-oxoglutarate 3-dioxygenase	1.744	Up	0.022984	chloroplast	K00475	F3H; naringenin 3-dioxygenase [EC:1.14.11.9]	zma01110 Biosynthesis of secondary metabolites - Zea mays (maize); zma01100 Metabolic pathways - Zea mays (maize); zma00941 Flavonoid biosynthesis - Zea mays (maize);	IPR005123; IPR027443;	Oxoglutarate/iron-dependent dioxygenase; Isopenicillin N synthase-like;
Zm00001d009908_P009	UDP-glucuronic acid decarboxylase 4	1.739	Up	0.0179556	chloroplast	K08678	UXS1; UDP-glucuronate decarboxylase [EC:4.1.1.35]	zma00520 Amino sugar and nucleotide sugar metabolism - Zea mays (maize); zma01100 Metabolic pathways - Zea mays (maize);	IPR016040;	NAD(P)-binding domain;
Zm00001d053064_P001	uncharacterized protein	1.738	Up	0.0029225	cytoplasm	K14684
Zm00001d014615_P002	xyloglucan endotransglycosylase homolog1 cDNA clone (cultivar Berkeley Fast) GN= xet1	1.735	Up	0.000181373	nucleus				IPR010713; IPR013320; IPR000757;	Xyloglucan endo-transglycosylase, C-terminal; Concanavalin A-like lectin/glucanase domain; Glycoside hydrolase family 16;
Zm00001d042058_P001	SART-1 family protein DOT2	1.734	Up	0.005457	nucleus	K11984	SART1; U4/U6.U5 tri-snRNP-associated protein 1	zma03040 Spliceosome - Zea mays (maize);
Zm00001d004396_P036	Vacuolar protein sorting-associated protein 54 chloroplastic	1.733	Up	0.039624	chloroplast	K17600			IPR012501;	Vps54-likeVacuolar protein sorting-associated protein 54, C-terminal;
Zm00001d048214_P001	protein GN=CHP-rich zinc finger protein-like	1.733	Up	0.0143017	chloroplast				IPR002219; IPR004146;	Protein kinase C-like, phorbol ester/diacylglycerol-binding domain; DC1;
Zm00001d042453_P003	aldolase1 cytosolic aldolase GN= ald1	1.732	Up	0.00157707	chloroplast	K01623	ALDO; fructose-bisphosphate aldolase, class I [EC:4.1.2.13]	zma00030 Pentose phosphate pathway - Zea mays (maize); zma00010 Glycolysis / Gluconeogenesis - Zea mays (maize); zma01230 Biosynthesis of amino acids - Zea mays (maize); zma01200 Carbon metabolism - Zea mays (maize); zma01110 Biosynthesis of secondary metabolites - Zea mays (maize); zma01100 Metabolic pathways - Zea mays (maize); zma00051 Fructose and mannose metabolism - Zea mays (maize); zma007…	IPR013785;	Aldolase-type TIM barrel;
Zm00001d005027_P003	protein GN=Expressed protein	1.732	Up	0.0087212	cytoplasm
Zm00001d052436_P001	ubiquinol-cytochrome C reductase UQCRX/QCR9-like family protein	1.728	Up	0.0056151	cytoplasm	K00419	QCR9; ubiquinol-cytochrome c reductase subunit 9	zma00190 Oxidative phosphorylation - Zea mays (maize); zma01100 Metabolic pathways - Zea mays (maize);
Zm00001d001828_P023	Katanin p80 WD40 repeat-containing subunit B1 homolog	1.724	Up	0.0118615	chloroplast	K18643			IPR017986; IPR015943;	WD40-repeat-containing domain; WD40/YVTN repeat-like-containing domain;
Zm00001d008795_P001	UDP-glycosyltransferase 74B1	1.723	Up	0.021424	chloroplast
Zm00001d032111_P001	alpha/beta-Hydrolases superfamily protein	1.723	Up	0.0092179	chloroplast				IPR029058; IPR007751;	Alpha/Beta hydrolase fold; Domain of unknown function DUF676, lipase-like;
Zm00001d050123_P001	GrpE protein homolog	1.722	Up	0.000139023	chloroplast	K03687			IPR009012; IPR013805;	GrpE nucleotide exchange factor, head; GrpE nucleotide exchange factor, coiled-coil;
Zm00001d002332_P025	NAD(P)-binding Rossmann-fold superfamily protein	1.721	Up	0.0065037	chloroplast	K13237	DECR2; peroxisomal 2,4-dienoyl-CoA reductase [EC:1.3.1.34]	zma04146 Peroxisome - Zea mays (maize);	IPR016040;	NAD(P)-binding domain;
Zm00001d050125_P020	Putative sucrose-phosphate synthase family protein isoform 1%3B Putative sucrose-phosphate synthase family protein isoform 2%3B Putative sucrose-phosphate synthase family protein isoform 3	1.719	Up	0.00183881	cytoplasm	K00696	E2.4.1.14; sucrose-phosphate synthase [EC:2.4.1.14]	zma00500 Starch and sucrose metabolism - Zea mays (maize); zma01100 Metabolic pathways - Zea mays (maize);	IPR006380; IPR000368; IPR001296;	Sucrose-phosphatase, N-terminal; Sucrose synthase; Glycosyl transferase, family 1;
Zm00001d024903_P001	"heat shock protein, 90 kDa heat-induced GN= hsp90"	1.718	Up	0.000177853	cytoplasm	K04079	HSP90A; molecular chaperone HtpG	zma04626 Plant-pathogen interaction - Zea mays (maize); zma04141 Protein processing in endoplasmic reticulum - Zea mays (maize);	IPR020575; IPR020568; IPR003594;	Heat shock protein Hsp90, N-terminal; Ribosomal protein S5 domain 2-type fold; Histidine kinase-like ATPase, C-terminal domain;
Zm00001d022092_P001	Cytosolic sulfotransferase 17	1.713	Up	0.040201	cytoplasm	K22312			IPR000863; IPR027417;	Sulfotransferase domain; P-loop containing nucleoside triphosphate hydrolase;
Zm00001d044747_P001	B12D protein	1.712	Up	0.048077	cytoplasm
Zm00001d040470_P015	Exonuclease domain-containing protein 1	1.71	Up	0.0068432	cytoplasm	K18417			IPR012337; IPR013520; IPR010666;	Ribonuclease H-like domain; Exonuclease, RNase T/DNA polymerase III; Zinc finger, GRF-type;
Zm00001d041246_P001	Glycine-rich RNA-binding protein 7	1.71	Up	0.0050606	nucleus				IPR000504; IPR012677;	RNA recognition motif domain; Nucleotide-binding alpha-beta plait domain;
Zm00001d049103_P001	Cysteine/Histidine-rich C1 domain family protein	1.709	Up	0.0085625	mitochondria				IPR004146;	DC1;
Zm00001d042973_P002	IQ-domain 3	1.707	Up	0.0083815	mitochondria
Zm00001d049694_P003	Ribosome-recycling factor chloroplastic	1.707	Up	0.041119	chloroplast	K02838			IPR023584;	Ribosome recycling factor domain;
Zm00001d046740_P003	Zinc finger CCCH domain-containing protein 52	1.706	Up	0.029844	chloroplast				IPR000571; IPR004087; IPR004088;	Zinc finger, CCCH-type; K Homology domain; K Homology domain, type 1;
Zm00001d047289_P004	Nuclear transport factor 2 (NTF2) family protein with RNA binding (RRM-RBD-RNP motifs) domain	1.705	Up	0.00021792	nucleus				IPR002075; IPR000504; IPR018222; IPR012677; IPR032710;	Nuclear transport factor 2; RNA recognition motif domain; Nuclear transport factor 2, eukaryote; Nucleotide-binding alpha-beta plait domain; NTF2-like domain;
Zm00001d037656_P001	Xylanase inhibitor protein 1	1.704	Up	0.038902	extracellular	K01183	E3.2.1.14; chitinase [EC:3.2.1.14]	zma00520 Amino sugar and nucleotide sugar metabolism - Zea mays (maize); zma01100 Metabolic pathways - Zea mays (maize);	IPR001223; IPR017853; IPR013781;	Glycoside hydrolase family 18, catalytic domain; Glycoside hydrolase superfamily; Glycoside hydrolase, catalytic domain;
Zm00001d045650_P001	Signal recognition particle 9 kDa protein	1.704	Up	0.031505	chloroplast	K03109	SRP9; signal recognition particle subunit SRP9	zma03060 Protein export - Zea mays (maize);	IPR009018;	Signal recognition particle, SRP9/SRP14 subunit;
Zm00001d021587_P002	Protein FLX-like 1	1.703	Up	0.038925	mitochondria
Zm00001d027648_P001	Tankyrase 1	1.702	Up	0.039317	mitochondria				IPR020683;	Ankyrin repeat-containing domain;
Zm00001d004498_P002	D111/G-patch domain-containing protein	1.699	Up	0.02192	nucleus				IPR007087; IPR000467;	Zinc finger, C2H2; G-patch domain;
Zm00001d014149_P001	HSP20-like chaperones superfamily protein	1.697	Up	0.049464	cytoplasm				IPR002068; IPR008978;	Alpha crystallin/Hsp20 domain; HSP20-like chaperone;
Zm00001d033262_P001	Protein LSD1	1.696	Up	0.038678	chloroplast				IPR005735;	Zinc finger, LSD1-type;
Zm00001d024885_P001	Putative WD40-like beta propeller repeat family protein	1.694	Up	0.00024129	chloroplast				IPR011042;	Six-bladed beta-propeller, TolB-like;
Zm00001d012625_P001	L-type lectin-domain containing receptor kinase IX.1	1.692	Up	0.0062835	plasma membrane				IPR001220; IPR000719; IPR013320; IPR011009;	Legume lectin domain; Protein kinase domain; Concanavalin A-like lectin/glucanase domain; Protein kinase-like domain;
Zm00001d017890_P006	Retrotransposon protein Ty1-copia subclass	1.692	Up	0.00097764	cytoplasm				IPR012336;	Thioredoxin-like fold;
Zm00001d048065_P002	Tubulin alpha-1 chain	1.692	Up	9.7833e-05	cytoplasm	K07374	TUBA; tubulin alpha	zma04145 Phagosome - Zea mays (maize);	IPR003008; IPR023123; IPR008280; IPR018316;	Tubulin/FtsZ, GTPase domain; Tubulin, C-terminal; Tubulin/FtsZ, C-terminal; Tubulin/FtsZ, 2-layer sandwich domain;
Zm00001d017139_P002	hydroxymethylbutenyl diphosphate synthase1 GN= hds1	1.691	Up	1.60188e-05	chloroplast	K03526	gcpE; (E)-4-hydroxy-3-methylbut-2-enyl-diphosphate synthase [EC:1.17.7.1 1.17.7.3]	zma00900 Terpenoid backbone biosynthesis - Zea mays (maize); zma01110 Biosynthesis of secondary metabolites - Zea mays (maize); zma01100 Metabolic pathways - Zea mays (maize);
Zm00001d048834_P002	DNA-directed RNA polymerases GN=DNA binding	1.691	Up	0.0025975	nucleus	K03005	RPA49; DNA-directed RNA polymerase I subunit RPA49	zma00240 Pyrimidine metabolism - Zea mays (maize); zma01100 Metabolic pathways - Zea mays (maize); zma03020 RNA polymerase - Zea mays (maize); zma00230 Purine metabolism - Zea mays (maize);
Zm00001d012606_P001	Pentatricopeptide repeat-containing protein mitochondrial	1.685	Up	0.00094142	mitochondria				IPR011990;	Tetratricopeptide-like helical domain;
Zm00001d011770_P001	Putative PWWP domain family protein	1.685	Up	0.0067987	nucleus				IPR000313;	PWWP domain;
Zm00001d052809_P003	Heat shock protein 90-5 chloroplastic	1.682	Up	0.0162382	chloroplast	K09487	HSP90B; heat shock protein 90kDa beta	zma04626 Plant-pathogen interaction - Zea mays (maize); zma04141 Protein processing in endoplasmic reticulum - Zea mays (maize);	IPR020575; IPR020568; IPR003594;	Heat shock protein Hsp90, N-terminal; Ribosomal protein S5 domain 2-type fold; Histidine kinase-like ATPase, C-terminal domain;
Zm00001d014792_P003	shepherd-like1 GN= shpl1	1.681	Up	0.00028276	vacuolar membrane	K09487	HSP90B; heat shock protein 90kDa beta	zma04626 Plant-pathogen interaction - Zea mays (maize); zma04141 Protein processing in endoplasmic reticulum - Zea mays (maize);	IPR020575; IPR020568; IPR003594;	Heat shock protein Hsp90, N-terminal; Ribosomal protein S5 domain 2-type fold; Histidine kinase-like ATPase, C-terminal domain;
Zm00001d004019_P001	stearoyl-acyl-carrier-protein desaturase5 GN= sacd5	1.68	Up	0.021001	chloroplast	K03921	FAB2; acyl-[acyl-carrier-protein] desaturase [EC:1.14.19.2 1.14.19.11 1.14.19.26]	zma01040 Biosynthesis of unsaturated fatty acids - Zea mays (maize); zma01212 Fatty acid metabolism - Zea mays (maize); zma00061 Fatty acid biosynthesis - Zea mays (maize);	IPR012348; IPR009078;	Ribonucleotide reductase-related; Ferritin-like superfamily;
Zm00001d021706_P001	Histone H2A	1.679	Up	0.043502	nucleus	K11251			IPR032454; IPR009072; IPR007125;	Histone H2A, C-terminal domain; Histone-fold; Histone H2A/H2B/H3;
Zm00001d028173_P001	FRIGIDA-like protein 1	1.675	Up	0.0064398	chloroplast
Zm00001d010976_P001	Probable beta-14-xylosyltransferase IRX9	1.674	Up	0.0051232	chloroplast	K20869			IPR029044;	Nucleotide-diphospho-sugar transferases;
Zm00001d011347_P006	Autophagy 7%3B Autophagy-related 7	1.67	Up	0.006342	chloroplast	K08337	ATG7; ubiquitin-like modifier-activating enzyme ATG7	zma04136 Autophagy - other - Zea mays (maize);	IPR000594; IPR016040; IPR032197;	THIF-type NAD/FAD binding fold; NAD(P)-binding domain; Ubiquitin-like modifier-activating enzyme Atg7, N-terminal;
Zm00001d010319_P001	cytochrome P450 family 721 subfamily A polypeptide 1	1.669	Up	0.0093403	chloroplast
Zm00001d035515_P001	Protein alx	1.668	Up	0.0051035	chloroplast
Zm00001d038562_P001	Probable sugar phosphate/phosphate translocator	1.665	Up	0.0101222	vacuolar membrane				IPR004853;	Sugar phosphate transporter domain;
Zm00001d037636_P004	Cellulose synthase-2%3B Cellulose synthase2	1.664	Up	0.00154208	plasma membrane	K10999			IPR027934; IPR013083; IPR029044;	Cellulose synthase, RING-type zinc finger; Zinc finger, RING/FYVE/PHD-type; Nucleotide-diphospho-sugar transferases;
Zm00001d001953_P001	Protein IQ-DOMAIN 32	1.664	Up	0.0107757	nucleus
Zm00001d013139_P001	Tubulin beta-4 chain	1.663	Up	0.00150029	chloroplast	K07375	TUBB; tubulin beta	zma04145 Phagosome - Zea mays (maize);	IPR003008; IPR023123; IPR008280;	Tubulin/FtsZ, GTPase domain; Tubulin, C-terminal; Tubulin/FtsZ, C-terminal;
Zm00001d053245_P005	Polyadenylate-binding protein-interacting protein 3	1.662	Up	0.033443	nucleus				IPR009604; IPR009818;	LsmAD domain; Ataxin-2, C-terminal;
Zm00001d034883_P002	protein binding GN=nucleotide binding	1.661	Up	0.027335	nucleus	K11806			IPR017986; IPR015943;	WD40-repeat-containing domain; WD40/YVTN repeat-like-containing domain;
Zm00001d021577_P001	UDP-glycosyltransferase 71B1	1.66	Up	0.029796	endoplasmic reticulum
Zm00001d044379_P009	CASC3/Barentsz eIF4AIII binding	1.659	Up	0.0005234	nucleus
Zm00001d016756_P001	NF-180	1.659	Up	0.0175024	chloroplast
Zm00001d035201_P001	60S acidic ribosomal protein P0 GN= arpp0	1.657	Up	8.4409e-05	cytoplasm	K02941	RP-LP0; large subunit ribosomal protein LP0	zma03010 Ribosome - Zea mays (maize);
Zm00001d003352_P002	Per1-like family protein	1.655	Up	0.0116374	plasma membrane
Zm00001d003502_P006	Signal recognition particle 19 kDa protein	1.655	Up	0.00088285	cytoplasm	K03105	SRP19; signal recognition particle subunit SRP19	zma03060 Protein export - Zea mays (maize);
Zm00001d008354_P006	Zinc knuckle (CCHC-type) family protein	1.653	Up	0.027079	nucleus				IPR001878;	Zinc finger, CCHC-type;
Zm00001d014525_P001	Glycosyltransferase	1.651	Up	0.0021441	chloroplast	K20871			IPR029044;	Nucleotide-diphospho-sugar transferases;
Zm00001d032170_P001	uncharacterized protein	1.646	Up	0.00157743	chloroplast				IPR011993;	PH domain-like;
Zm00001d022071_P002	Nuclear transport factor 2 (NTF2) family protein with RNA binding (RRM-RBD-RNP motifs) domain	1.642	Up	0.021318	endoplasmic reticulum,plasma membrane				IPR002075; IPR018222; IPR000504; IPR012677; IPR032710;	Nuclear transport factor 2; Nuclear transport factor 2, eukaryote; RNA recognition motif domain; Nucleotide-binding alpha-beta plait domain; NTF2-like domain;
Zm00001d006267_P006	Serine/threonine-protein kinase STY46	1.642	Up	0.0139242	cytoplasm				IPR000719; IPR002912; IPR001245; IPR011009;	Protein kinase domain; ACT domain; Serine-threonine/tyrosine-protein kinase catalytic domain; Protein kinase-like domain;
Zm00001d042091_P001	Flowering time control protein FY	1.639	Up	0.00143728	peroxisome	K15542	PFS2; polyadenylation factor subunit 2	zma03015 mRNA surveillance pathway - Zea mays (maize);	IPR017986; IPR015943;	WD40-repeat-containing domain; WD40/YVTN repeat-like-containing domain;
Zm00001d011873_P002	Essential protein Yae1 N-terminal	1.637	Up	0.040637	nucleus				IPR019191;	Essential protein Yae1, N-terminal;
Zm00001d013669_P005	?? NCBI putative dnaJ chaperone family protein GN= rz474a(dnaj)	1.636	Up	0.0040841	nucleus	K09503	DNAJA2; DnaJ homolog subfamily A member 2	zma04141 Protein processing in endoplasmic reticulum - Zea mays (maize);	IPR008971; IPR002939; IPR001623; IPR001305;	HSP40/DnaJ peptide-binding; Chaperone DnaJ, C-terminal; DnaJ domain; Heat shock protein DnaJ, cysteine-rich domain;
Zm00001d048129_P002	Metal transporter Nramp3	1.635	Up	0.034723	plasma membrane	K21398
Zm00001d022327_P001	Probable carboxylesterase 18	1.635	Up	0.0092178	cytoplasm				IPR029058; IPR013094;	Alpha/Beta hydrolase fold; Alpha/beta hydrolase fold-3;
Zm00001d009608_P001	3-ketoacyl-CoA synthase	1.634	Up	0.0026632	plasma membrane	K15397	KCS; 3-ketoacyl-CoA synthase [EC:2.3.1.199]	zma00062 Fatty acid elongation - Zea mays (maize); zma01110 Biosynthesis of secondary metabolites - Zea mays (maize); zma01100 Metabolic pathways - Zea mays (maize);	IPR016039; IPR013747; IPR013601;	Thiolase-like; 3-Oxoacyl-[acyl-carrier-protein (ACP)] synthase III, C-terminal; FAE1/Type III polyketide synthase-like protein;
Zm00001d024675_P001	RNA-binding (RRM/RBD/RNP motifs) family protein	1.633	Up	0.025342	chloroplast				IPR000504; IPR012677;	RNA recognition motif domain; Nucleotide-binding alpha-beta plait domain;
Zm00001d042965_P003	Nucleic acid binding protein	1.633	Up	0.0078775	nucleus				IPR000571; IPR032378;	Zinc finger, CCCH-type; ZC3H15/TMA46 family, C-terminal;
Zm00001d035024_P001	uncharacterized protein	1.632	Up	0.00181952	chloroplast
Zm00001d008210_P006	Germin-like protein subfamily 2 member 1	1.631	Up	0.027444	cytoplasm				IPR011051; IPR006045; IPR014710;	RmlC-like cupin domain; Cupin 1; RmlC-like jelly roll fold;
Zm00001d053966_P001	uncharacterized protein	1.631	Up	0.038795	cytoplasm
Zm00001d036905_P006	Transducin/WD40 repeat-like superfamily protein	1.628	Up	0.0352	cytoplasm	K13137	STRAP; serine-threonine kinase receptor-associated protein	zma03013 RNA transport - Zea mays (maize);	IPR017986; IPR015943;	WD40-repeat-containing domain; WD40/YVTN repeat-like-containing domain;
Zm00001d026243_P002	Multiple organellar RNA editing factor 2 chloroplastic	1.627	Up	0.020298	chloroplast
Zm00001d005402_P006	RNA-binding (RRM/RBD/RNP motifs) family protein	1.626	Up	0.0164223	nucleus				IPR000504; IPR012677;	RNA recognition motif domain; Nucleotide-binding alpha-beta plait domain;
Zm00001d023833_P003	Nucleoside diphosphate kinase	1.621	Up	0.025621	chloroplast	K00940	ndk; nucleoside-diphosphate kinase [EC:2.7.4.6]	zma00240 Pyrimidine metabolism - Zea mays (maize); zma01110 Biosynthesis of secondary metabolites - Zea mays (maize); zma01100 Metabolic pathways - Zea mays (maize); zma04016 MAPK signaling pathway - plant - Zea mays (maize); zma00230 Purine metabolism - Zea mays (maize);
Zm00001d021227_P002	Plant UBX domain-containing protein 8	1.62	Up	0.0143979	cytoplasm				IPR001012; IPR029071; IPR009060;	UBX domain; Ubiquitin-related domain; UBA-like;
Zm00001d012998_P001	50S ribosomal protein L17 chloroplastic	1.619	Up	0.0035987	chloroplast	K02879	RP-L17; large subunit ribosomal protein L17	zma03010 Ribosome - Zea mays (maize);
Zm00001d031101_P002	methyl binding domain106 GN= mbd106	1.619	Up	7.5588e-05	nucleus				IPR016177; IPR001739;	DNA-binding domain; Methyl-CpG DNA binding;
Zm00001d033726_P023	Probable serine/threonine protein kinase IREH1	1.618	Up	0.0036449	nucleus
Zm00001d021721_P003	V-type proton ATPase subunit H	1.617	Up	0.005325	cytoplasm	K02144	ATPeV1H; V-type H+-transporting ATPase subunit H	zma04145 Phagosome - Zea mays (maize); zma00190 Oxidative phosphorylation - Zea mays (maize); zma01100 Metabolic pathways - Zea mays (maize);	IPR011987; IPR011989; IPR016024;	ATPase, V1 complex, subunit H, C-terminal; Armadillo-like helical; Armadillo-type fold;
Zm00001d031081_P004	NagB/RpiA/CoA transferase-like superfamily protein	1.616	Up	0.043655	chloroplast	K03680	EIF2B4; translation initiation factor eIF-2B subunit delta	zma03013 RNA transport - Zea mays (maize);
Zm00001d052735_P013	Plant UBX domain-containing protein 8	1.616	Up	0.040939	nucleus				IPR029071; IPR001012; IPR009060;	Ubiquitin-related domain; UBX domain; UBA-like;
Zm00001d031050_P002	DEAD-box ATP-dependent RNA helicase 53	1.608	Up	1.3131e-07	mitochondria				IPR011545; IPR014014; IPR027417; IPR014001; IPR001650;	DEAD/DEAH box helicase domain; RNA helicase, DEAD-box type, Q motif; P-loop containing nucleoside triphosphate hydrolase; Helicase superfamily 1/2, ATP-binding domain; Helicase, C-terminal;
Zm00001d031975_P001	Fb14	1.607	Up	0.0188589	mitochondria	K03938	NDUFS5; NADH dehydrogenase (ubiquinone) Fe-S protein 5	zma00190 Oxidative phosphorylation - Zea mays (maize); zma01100 Metabolic pathways - Zea mays (maize);
Zm00001d006670_P004	Bet1-like protein	1.606	Up	0.0026208	vacuolar membrane	K08505	SFT1; protein transport protein SFT1	zma04130 SNARE interactions in vesicular transport - Zea mays (maize);	IPR000727;	Target SNARE coiled-coil homology domain;
Zm00001d015138_P004	uncharacterized protein	1.6	Up	0.00074175	nucleus
Zm00001d044762_P001	Salicylate/benzoate carboxyl methyltransferase	1.599	Up	0.0086249	nucleus	K21485			IPR029063;	S-adenosyl-L-methionine-dependent methyltransferase;
Zm00001d005253_P003	V-type proton ATPase subunit G1	1.598	Up	0.0020769	chloroplast	K02152	ATPeV1G; V-type H+-transporting ATPase subunit G	zma04145 Phagosome - Zea mays (maize); zma00190 Oxidative phosphorylation - Zea mays (maize); zma01100 Metabolic pathways - Zea mays (maize);
Zm00001d020390_P001	17.4 kDa class III heat shock protein	1.598	Up	0.0103023	cytoplasm	K13993	HSP20; HSP20 family protein	zma04141 Protein processing in endoplasmic reticulum - Zea mays (maize);	IPR002068; IPR008978;	Alpha crystallin/Hsp20 domain; HSP20-like chaperone;
Zm00001d051675_P001	Transmembrane 9 superfamily member 12	1.594	Up	0.0189206	chloroplast				IPR020846;	Major facilitator superfamily domain;
Zm00001d037122_P003	Putative DUF1296 domain containing family protein	1.591	Up	0.0181201	nucleus				IPR009060;	UBA-like;
Zm00001d032266_P003	Cytochrome b5	1.589	Up	0.0092757	chloroplast				IPR001199;	Cytochrome b5-like heme/steroid binding domain;
Zm00001d021197_P001	Alpha-L-fucosidase 1	1.589	Up	0.0039803	chloroplast	K01206	FUCA; alpha-L-fucosidase [EC:3.2.1.51]	zma00511 Other glycan degradation - Zea mays (maize);	IPR017853; IPR008979; IPR013781;	Glycoside hydrolase superfamily; Galactose-binding domain-like; Glycoside hydrolase, catalytic domain;
Zm00001d015893_P005	Probable pre-mRNA-splicing factor ATP-dependent RNA helicase DEAH5	1.588	Up	0.0152448	cytoplasm	K12818	DHX8; ATP-dependent RNA helicase DHX8/PRP22 [EC:3.6.4.13]	zma03040 Spliceosome - Zea mays (maize);	IPR007502; IPR011545; IPR014001; IPR027417; IPR001650;	Helicase-associated domain; DEAD/DEAH box helicase domain; Helicase superfamily 1/2, ATP-binding domain; P-loop containing nucleoside triphosphate hydrolase; Helicase, C-terminal;
Zm00001d037125_P006	Calcium-binding EF hand family protein	1.587	Up	0.005037	nucleus				IPR000261; IPR011992; IPR002048;	EH domain; EF-hand domain pair; EF-hand domain;
Zm00001d053591_P002	Protein CLP1 homolog	1.587	Up	0.024799	cytoplasm	K14399	CLP1; polyribonucleotide 5'-hydroxyl-kinase [EC:2.7.1.78]	zma03015 mRNA surveillance pathway - Zea mays (maize);	IPR010655; IPR027417; IPR032324; IPR032319;	Pre-mRNA cleavage complex subunit Clp1; P-loop containing nucleoside triphosphate hydrolase; Clp1, N-terminal beta-sandwich domain; Polyribonucleotide 5'-hydroxyl-kinase Clp1, P-loop domain;
Zm00001d028529_P002	hydroxyproline-rich glycoprotein family protein	1.587	Up	0.00193515	extracellular	K12826	SF3A2; splicing factor 3A subunit 2	zma03040 Spliceosome - Zea mays (maize);	IPR003604; IPR000690; IPR031781;	Zinc finger, U1-type; Zinc finger, C2H2-type matrin; SF3A2 domain;
Zm00001d026396_P001	Formation of crista junctions protein 1	1.587	Up	0.0076838	mitochondria	K17785
Zm00001d044086_P001	Nucleic acid-binding OB-fold-like protein	1.586	Up	0.0046784	mitochondria	K03111	ssb; single-strand DNA-binding protein	zma03030 DNA replication - Zea mays (maize); zma03440 Homologous recombination - Zea mays (maize); zma03430 Mismatch repair - Zea mays (maize);	IPR012340;	Nucleic acid-binding, OB-fold;
Zm00001d032109_P002	dentin sialophosphoprotein-related	1.584	Up	0.00197673	nucleus
Zm00001d045379_P007	Coatomer subunit beta'-3	1.583	Up	0.0148617	nucleus	K17302			IPR011990; IPR006692; IPR017986; IPR015943;	Tetratricopeptide-like helical domain; Coatomer, WD associated region; WD40-repeat-containing domain; WD40/YVTN repeat-like-containing domain;
Zm00001d033632_P007	ARM repeat superfamily protein	1.582	Up	0.047655	plasma membrane	K20222			IPR034085; IPR011989; IPR016024;	TOG domain; Armadillo-like helical; Armadillo-type fold;
Zm00001d007186_P006	Apyrase 1	1.582	Up	2.0766e-05	chloroplast	K14641	APY1_2; apyrase [EC:3.6.1.5]	zma00240 Pyrimidine metabolism - Zea mays (maize); zma00230 Purine metabolism - Zea mays (maize);
Zm00001d033623_P002	Lipoxygenase	1.581	Up	2.3264e-05	cytoplasm	K15718	LOX1_5; linoleate 9S-lipoxygenase [EC:1.13.11.58]	zma00591 Linoleic acid metabolism - Zea mays (maize);	IPR027433; IPR001024; IPR013819;	Lipoxygenase, domain 3; PLAT/LH2 domain; Lipoxygenase, C-terminal;
Zm00001d018005_P006	Protease Do-like 9	1.581	Up	0.0027424	chloroplast				IPR009003; IPR001478;	Peptidase S1, PA clan; PDZ domain;
Zm00001d017258_P007	Succinate--CoA ligase [ADP-forming] subunit beta mitochondrial	1.579	Up	0.0076562	mitochondria	K01900	LSC2; succinyl-CoA synthetase beta subunit [EC:6.2.1.4 6.2.1.5]	zma01200 Carbon metabolism - Zea mays (maize); zma00640 Propanoate metabolism - Zea mays (maize); zma01110 Biosynthesis of secondary metabolites - Zea mays (maize); zma01100 Metabolic pathways - Zea mays (maize); zma00020 Citrate cycle (TCA cycle) - Zea mays (maize);	IPR005811; IPR013816; IPR013650; IPR013815; IPR016102;	ATP-citrate lyase/succinyl-CoA ligase; ATP-grasp fold, subdomain 2; ATP-grasp fold, succinyl-CoA synthetase-type; ATP-grasp fold, subdomain 1; Succinyl-CoA synthetase-like;
Zm00001d017119_P003	Glucose-6-phosphate 1-dehydrogenase	1.578	Up	0.0042388	cytoplasm	K00036	G6PD; glucose-6-phosphate 1-dehydrogenase [EC:1.1.1.49 1.1.1.363]	zma00030 Pentose phosphate pathway - Zea mays (maize); zma01200 Carbon metabolism - Zea mays (maize); zma01110 Biosynthesis of secondary metabolites - Zea mays (maize); zma01100 Metabolic pathways - Zea mays (maize); zma00480 Glutathione metabolism - Zea mays (maize);	IPR022675; IPR016040; IPR022674;	Glucose-6-phosphate dehydrogenase, C-terminal; NAD(P)-binding domain; Glucose-6-phosphate dehydrogenase, NAD-binding;
Zm00001d006871_P002	40S ribosomal protein Sa-1	1.578	Up	0.0139437	cytoplasm	K02998	RP-SAe; small subunit ribosomal protein SAe	zma03010 Ribosome - Zea mays (maize);	IPR023591;	Ribosomal protein S2, flavodoxin-like domain;
Zm00001d013431_P001	Ubiquitin-conjugating enzyme E2 variant 1A	1.575	Up	0.0156154	nucleus	K10704			IPR016135; IPR000608;	Ubiquitin-conjugating enzyme/RWD-like; Ubiquitin-conjugating enzyme E2;
Zm00001d049405_P001	Autophagy 8e%2C mRNA	1.575	Up	0.00028417	cytoplasm	K08341	GABARAP; GABA(A) receptor-associated protein	zma04136 Autophagy - other - Zea mays (maize);	IPR029071;	Ubiquitin-related domain;
Zm00001d022557_P001	nicotianamine synthase5 function inferred from sequence similarity GN= nas5	1.575	Up	0.0064356	cytoplasm	K05953			IPR029063;	S-adenosyl-L-methionine-dependent methyltransferase;
Zm00001d011742_P038	SUPPRESSOR OF ABI3-5	1.574	Up	0.00029737	nucleus	K13094			IPR000504; IPR012677; IPR001876;	RNA recognition motif domain; Nucleotide-binding alpha-beta plait domain; Zinc finger, RanBP2-type;
Zm00001d010840_P001	triacylglycerol lipase-like 1	1.573	Up	0.00169747	plasma membrane				IPR002921; IPR029058;	Fungal lipase-like domain; Alpha/Beta hydrolase fold;
Zm00001d042808_P001	auxin transporter-like1 mutant tassels have reduced branch numbers GN= atl1	1.573	Up	0.035264	cytoplasm				IPR011993; IPR001849;	PH domain-like; Pleckstrin homology domain;
Zm00001d036151_P001	Nucleic acid-binding OB-fold-like protein	1.572	Up	0.000142705	nucleus	K03236	EIF1A; translation initiation factor 1A	zma03013 RNA transport - Zea mays (maize);	IPR012340; IPR006196;	Nucleic acid-binding, OB-fold; RNA-binding domain, S1, IF1 type;
Zm00001d013612_P003	Tubulin beta-4 chain	1.569	Up	0.00392	nucleus	K07375	TUBB; tubulin beta	zma04145 Phagosome - Zea mays (maize);	IPR003008; IPR023123; IPR008280; IPR018316;	Tubulin/FtsZ, GTPase domain; Tubulin, C-terminal; Tubulin/FtsZ, C-terminal; Tubulin/FtsZ, 2-layer sandwich domain;
Zm00001d053891_P001	ILITYHIA	1.567	Up	0.0021358	cytoplasm				IPR011989; IPR016024;	Armadillo-like helical; Armadillo-type fold;
Zm00001d009690_P001	RNA cytidine acetyltransferase 1	1.564	Up	0.036964	nucleus	K14521	NAT10; N-acetyltransferase 10 [EC:2.3.1.-]	zma03008 Ribosome biogenesis in eukaryotes - Zea mays (maize);	IPR013562; IPR000182; IPR007807; IPR027992;	tRNA(Met) cytidine acetyltransferase TmcA, N-terminal; GNAT domain; Helicase domain; Possible tRNA binding domain;
Zm00001d018103_P001	Probable RNA-binding protein ARP1	1.563	Up	0.0119812	nucleus				IPR000504; IPR012677;	RNA recognition motif domain; Nucleotide-binding alpha-beta plait domain;
Zm00001d016877_P002	RNA 2'-phosphotransferase Tpt1 / KptA family	1.561	Up	0.038735	chloroplast	K10669
Zm00001d017152_P001	endochitinase precursor4 involved in inducing pathogen defenses and suppressing herbivore defenses GN= epr4	1.561	Up	0.027104	chloroplast	K01183	E3.2.1.14; chitinase [EC:3.2.1.14]	zma00520 Amino sugar and nucleotide sugar metabolism - Zea mays (maize); zma01100 Metabolic pathways - Zea mays (maize);	IPR023346; IPR001002; IPR000726;	Lysozyme-like domain; Chitin-binding, type 1; Glycoside hydrolase, family 19, catalytic;
Zm00001d031883_P001	Bet1-like SNARE 1-1	1.56	Up	0.011516	mitochondria	K08504	BET1; blocked early in transport 1	zma04130 SNARE interactions in vesicular transport - Zea mays (maize);	IPR000727;	Target SNARE coiled-coil homology domain;
Zm00001d006034_P004	DNA binding protein	1.56	Up	0.035116	nucleus				IPR005175;	PPC domain;
Zm00001d010519_P001	Tetratricopeptide repeat (TPR)-like superfamily protein	1.559	Up	0.005245	chloroplast				IPR011990;	Tetratricopeptide-like helical domain;
Zm00001d049965_P001	Ribonucleoprotein	1.559	Up	0.0195392	chloroplast	K11294			IPR000504; IPR012677;	RNA recognition motif domain; Nucleotide-binding alpha-beta plait domain;
Zm00001d026472_P001	D-3-phosphoglycerate dehydrogenase 3 chloroplastic	1.558	Up	0.0170628	mitochondria	K00058	serA; D-3-phosphoglycerate dehydrogenase / 2-oxoglutarate reductase [EC:1.1.1.95 1.1.1.399]	zma01230 Biosynthesis of amino acids - Zea mays (maize); zma01200 Carbon metabolism - Zea mays (maize); zma01100 Metabolic pathways - Zea mays (maize); zma00260 Glycine, serine and threonine metabolism - Zea mays (maize);	IPR006139; IPR006140; IPR029009; IPR016040; IPR002912; IPR015878;	D-isomer specific 2-hydroxyacid dehydrogenase, catalytic domain; D-isomer specific 2-hydroxyacid dehydrogenase, NAD-binding domain; Allosteric substrate binding domain; NAD(P)-binding domain; ACT domain; S-adenosyl-L-homocysteine hydrolase, NAD binding domain;
Zm00001d020381_P008	Annexin D5	1.558	Up	0.0154597	chloroplast	K17098
Zm00001d013296_P001	ATP sulfurylase 1 chloroplastic	1.557	Up	0.043383	chloroplast	K13811	PAPSS; 3'-phosphoadenosine 5'-phosphosulfate synthase [EC:2.7.7.4 2.7.1.25]	zma00920 Sulfur metabolism - Zea mays (maize); zma01100 Metabolic pathways - Zea mays (maize); zma00261 Monobactam biosynthesis - Zea mays (maize); zma00230 Purine metabolism - Zea mays (maize); zma00450 Selenocompound metabolism - Zea mays (maize);	IPR014729; IPR015947; IPR025980; IPR024951; IPR002650;	Rossmann-like alpha/beta/alpha sandwich fold; PUA-like domain; ATP-sulfurylase PUA-like domain; Sulphate adenylyltransferase catalytic domain; Sulphate adenylyltransferase;
Zm00001d042664_P002	Patellin-1	1.557	Up	0.00056011	nucleus				IPR001251; IPR009038; IPR011074;	CRAL-TRIO lipid binding domain; GOLD domain; CRAL/TRIO, N-terminal domain;
Zm00001d048356_P001	24-methylenesterol C-methyltransferase 2	1.555	Up	0.02908	cytoplasm	K08242	E2.1.1.143; 24-methylenesterol C-methyltransferase [EC:2.1.1.143]	zma01110 Biosynthesis of secondary metabolites - Zea mays (maize); zma00100 Steroid biosynthesis - Zea mays (maize);	IPR030384; IPR013705; IPR029063; IPR013216;	SAM-dependent methyltransferase SMT-type; Sterol methyltransferase C-terminal; S-adenosyl-L-methionine-dependent methyltransferase; Methyltransferase type 11;
Zm00001d013185_P001	Allene oxide synthase chloroplastic	1.554	Up	0.00048431	chloroplast	K01723	AOS; hydroperoxide dehydratase [EC:4.2.1.92]	zma00592 alpha-Linolenic acid metabolism - Zea mays (maize); zma01110 Biosynthesis of secondary metabolites - Zea mays (maize); zma01100 Metabolic pathways - Zea mays (maize);
Zm00001d032353_P001	blue-light receptor phototropin 2 GN= phot2	1.554	Up	0.0030019	nucleus	K20715			IPR000719; IPR000014; IPR000700; IPR011009;	Protein kinase domain; PAS domain; PAS-associated, C-terminal; Protein kinase-like domain;
Zm00001d022257_P001	Transducin/WD40 repeat-like superfamily protein	1.553	Up	5.8843e-05	chloroplast	K14830			IPR017986; IPR015943;	WD40-repeat-containing domain; WD40/YVTN repeat-like-containing domain;
Zm00001d012984_P002	Protein FLC EXPRESSOR	1.552	Up	0.00036327	mitochondria
Zm00001d037550_P001	"peroxidase 5 cathodal, presence-absence GN= px5"	1.552	Up	0.0051186	chloroplast	K00430	E1.11.1.7; peroxidase [EC:1.11.1.7]	zma00940 Phenylpropanoid biosynthesis - Zea mays (maize); zma01110 Biosynthesis of secondary metabolites - Zea mays (maize); zma01100 Metabolic pathways - Zea mays (maize);	IPR033905; IPR002016;	Secretory peroxidase; Haem peroxidase, plant/fungal/bacterial;
Zm00001d004804_P001	Alkaline/neutral invertase CINV2	1.551	Up	0.000124379	chloroplast				IPR008928;	Six-hairpin glycosidase-like;
Zm00001d038646_P003	Brix domain-containing protein 1	1.548	Up	0.0020036	cytoplasm	K14847			IPR007109;	Brix domain;
Zm00001d049438_P001	Germin-like protein subfamily 1 member 8	1.547	Up	0.028165	extracellular				IPR011051; IPR006045; IPR014710;	RmlC-like cupin domain; Cupin 1; RmlC-like jelly roll fold;
Zm00001d035046_P001	Non-lysosomal glucosylceramidase	1.546	Up	0.00023835	nucleus	K17108	GBA2; non-lysosomal glucosylceramidase [EC:3.2.1.45]	zma01100 Metabolic pathways - Zea mays (maize); zma00511 Other glycan degradation - Zea mays (maize); zma00600 Sphingolipid metabolism - Zea mays (maize);	IPR012341; IPR024462; IPR006775; IPR008928;	Six-hairpin glycosidase; Glycosyl-hydrolase family 116, N-terminal; Glycosyl-hydrolase family 116, catalytic region; Six-hairpin glycosidase-like;
Zm00001d004138_P002	Heavy metal-associated isoprenylated plant protein 27	1.545	Up	0.0043227	chloroplast				IPR006121;	Heavy metal-associated domain, HMA;
Zm00001d014977_P036	"brahma1 The protein associated with this locus was identified by sequence similarity to the Arabidopsis protein, then copurified from maize with complexes that regulate cellular growth and division.transcription regulatory protein SNF2 putative GN= brm1"	1.543	Up	0.045424	nucleus	K11647			IPR014978; IPR014001; IPR027417; IPR000330;	Glutamine-Leucine-Glutamine, QLQ; Helicase superfamily 1/2, ATP-binding domain; P-loop containing nucleoside triphosphate hydrolase; SNF2-related, N-terminal domain;
Zm00001d019241_P002	uncharacterized protein	1.535	Up	0.0081406	extracellular
Zm00001d053172_P002	F-box protein PP2-B10	1.534	Up	0.0047978	cytoplasm				IPR001810;	F-box domain;
Zm00001d005105_P005	Protein kinase superfamily protein	1.534	Up	0.026261	nucleus	K08853			IPR000719; IPR011009;	Protein kinase domain; Protein kinase-like domain;
Zm00001d036201_P001	uncharacterized protein	1.533	Up	0.0046959	chloroplast	K20776	BABAM; BRISC and BRCA1-A complex member 1	zma03440 Homologous recombination - Zea mays (maize);
Zm00001d027671_P001	Methyltransferase-like protein 1	1.53	Up	6.096e-05	nucleus				IPR029063;	S-adenosyl-L-methionine-dependent methyltransferase;
Zm00001d051644_P005	"tola protein homolog1 endosperm cDNA 5C05A03 (uaz254) similar to E. coli TOLA protein, an inner membrane, colicin transport protein GN= tola1"	1.53	Up	0.021242	endoplasmic reticulum	K03255			IPR025697; IPR011990; IPR033646; IPR028275;	CLU domain; Tetratricopeptide-like helical domain; CLU central domain; Clustered mitochondria protein, N-terminal;
Zm00001d005109_P001	uncharacterized protein	1.53	Up	0.0079205	chloroplast
Zm00001d006337_P001	Whole genome shotgun sequence of line PN40024 scaffold_26.assembly12x (Fragment)	1.527	Up	0.011404	chloroplast
Zm00001d016802_P002	L-ascorbate peroxidase S chloroplastic/mitochondrial	1.526	Up	0.00084102	chloroplast	K00434	E1.11.1.11; L-ascorbate peroxidase [EC:1.11.1.11]	zma00053 Ascorbate and aldarate metabolism - Zea mays (maize); zma00480 Glutathione metabolism - Zea mays (maize);	IPR002016;	Haem peroxidase, plant/fungal/bacterial;
Zm00001d038262_P001	Patellin-1	1.526	Up	0.00195886	nucleus				IPR001251; IPR009038; IPR011074;	CRAL-TRIO lipid binding domain; GOLD domain; CRAL/TRIO, N-terminal domain;
Zm00001d035770_P001	Phosphatidylinositol/phosphatidylcholine transfer protein SFH13	1.523	Up	0.00026417	nucleus
Zm00001d003288_P001	Eukaryotic translation initiation factor 4B2	1.521	Up	0.0048225	chloroplast
Zm00001d022615_P009	GDSL esterase/lipase EXL3	1.521	Up	0.045519	cytoplasm				IPR001087; IPR013830;	GDSL lipase/esterase; SGNH hydrolase-type esterase domain;
Zm00001d044068_P001	Molybdate transporter 2	1.52	Up	0.0088159	cytoplasm
Zm00001d027976_P002	GLABRA2 expression modulator	1.518	Up	0.0137818	cytoplasm				IPR004182;	GRAM domain;
Zm00001d033549_P001	Has 51 Blast hits to 50 proteins in 15 species Archae - 0 GN=BEST Arabidopsis thaliana protein match is: glycine-rich protein (TAIR:AT1G27090.1)	1.518	Up	0.00170347	chloroplast
Zm00001d037917_P001	uncharacterized protein	1.518	Up	0.0165412	mitochondria	K14839
Zm00001d018342_P002	trehalose-6-phosphate synthase11 GN= trps11	1.518	Up	0.0021012	nucleus	K16055	TPS; trehalose 6-phosphate synthase/phosphatase [EC:2.4.1.15 3.1.3.12]	zma00500 Starch and sucrose metabolism - Zea mays (maize); zma01100 Metabolic pathways - Zea mays (maize);	IPR001830; IPR023214;	Glycosyl transferase, family 20; HAD-like domain;
Zm00001d006124_P001	Has 2929 Blast hits to 2464 proteins in 333 species Archae - 2 GN=CONTAINS InterPro DOMAIN/s: Basic helix-loop-helix Nulp1-type (InterPro:IPR006994)	1.515	Up	0.032403	chloroplast
Zm00001d009657_P006	60S acidic ribosomal protein P2-5	1.515	Up	0.034315	chloroplast	K02943	RP-LP2; large subunit ribosomal protein LP2	zma03010 Ribosome - Zea mays (maize);
Zm00001d048238_P001	EMB514	1.515	Up	0.047943	nucleus
Zm00001d025922_P001	(+)-neomenthol dehydrogenase	1.514	Up	0.0109246	chloroplast	K15095	E1.1.1.208; (+)-neomenthol dehydrogenase [EC:1.1.1.208]	zma01110 Biosynthesis of secondary metabolites - Zea mays (maize); zma00902 Monoterpenoid biosynthesis - Zea mays (maize);	IPR016040;	NAD(P)-binding domain;
Zm00001d025412_P002	Nicotinate phosphoribosyltransferase-like protein	1.512	Up	0.0039995	cytoplasm	K00763	pncB; nicotinate phosphoribosyltransferase [EC:6.3.4.21]	zma01100 Metabolic pathways - Zea mays (maize); zma00760 Nicotinate and nicotinamide metabolism - Zea mays (maize);	IPR002638;	Quinolinate phosphoribosyl transferase, C-terminal;
Zm00001d007942_P001	Phosphatidylinositol 345-trisphosphate 3-phosphatase and protein-tyrosine-phosphatase PTEN2A	1.511	Up	0.0040767	nucleus	K01110	PTEN; phosphatidylinositol-3,4,5-trisphosphate 3-phosphatase and dual-specificity protein phosphatase PTEN [EC:3.1.3.16 3.1.3.48 3.1.3.67]	zma04070 Phosphatidylinositol signaling system - Zea mays (maize); zma01100 Metabolic pathways - Zea mays (maize); zma00562 Inositol phosphate metabolism - Zea mays (maize);	IPR029021; IPR029023; IPR014020; IPR000008;	Protein-tyrosine phosphatase-like; Tensin phosphatase, lipid phosphatase domain; Tensin phosphatase, C2 domain; C2 domain;
Zm00001d038280_P001	U-box domain-containing protein 29	1.509	Up	0.0127196	chloroplast				IPR003613; IPR011989; IPR013083;	U box domain; Armadillo-like helical; Zinc finger, RING/FYVE/PHD-type;
Zm00001d028240_P001	50S ribosomal protein L15 chloroplastic	1.508	Up	0.0105981	chloroplast	K02876	RP-L15; large subunit ribosomal protein L15	zma03010 Ribosome - Zea mays (maize);	IPR021131;	Ribosomal protein L18e/L15P;
Zm00001d009212_P003	dihydrolipoyl dehydrogenases	1.508	Up	0.035617	chloroplast	K00382	DLD; dihydrolipoamide dehydrogenase [EC:1.8.1.4]	zma00010 Glycolysis / Gluconeogenesis - Zea mays (maize); zma01200 Carbon metabolism - Zea mays (maize); zma00640 Propanoate metabolism - Zea mays (maize); zma01110 Biosynthesis of secondary metabolites - Zea mays (maize); zma00020 Citrate cycle (TCA cycle) - Zea mays (maize); zma00260 Glycine, serine and threonine metabolism - Zea mays (maize); zma01100 Metabolic pathways - Zea mays (maize); zma…	IPR016156; IPR004099; IPR023753;	FAD/NAD-linked reductase, dimerisation domain; Pyridine nucleotide-disulphide oxidoreductase, dimerisation domain; FAD/NAD(P)-binding domain;
Zm00001d036835_P002	Peroxidase 67	1.507	Up	0.00112221	chloroplast	K00430	E1.11.1.7; peroxidase [EC:1.11.1.7]	zma00940 Phenylpropanoid biosynthesis - Zea mays (maize); zma01110 Biosynthesis of secondary metabolites - Zea mays (maize); zma01100 Metabolic pathways - Zea mays (maize);	IPR033905; IPR002016;	Secretory peroxidase; Haem peroxidase, plant/fungal/bacterial;
Zm00001d001895_P006	Plant UBX domain-containing protein 7	1.506	Up	0.0148177	chloroplast				IPR006577; IPR029071; IPR001012; IPR012336;	UAS; Ubiquitin-related domain; UBX domain; Thioredoxin-like fold;
Zm00001d036440_P004	WAT1-related protein	1.506	Up	0.0150429	cytoplasm				IPR000620;	EamA domain;
Zm00001d019086_P004	RNA-binding (RRM/RBD/RNP motifs) family protein	1.506	Up	0.02396	nucleus	K14411	MSI; RNA-binding protein Musashi	zma03015 mRNA surveillance pathway - Zea mays (maize);	IPR034131; IPR000504; IPR012677;	DAZ-associated protein 1, RNA recognition motif 2; RNA recognition motif domain; Nucleotide-binding alpha-beta plait domain;
Zm00001d034365_P001	Syntaxin 121	1.503	Up	0.037779	cytoplasm	K08486	STX1B_2_3; syntaxin 1B/2/3	zma04130 SNARE interactions in vesicular transport - Zea mays (maize);	IPR000727; IPR010989; IPR006011;	Target SNARE coiled-coil homology domain; SNARE; Syntaxin, N-terminal domain;
Zm00001d045836_P001	Aspartyl protease AED1	1.5	Up	0.0071821	extracellular				IPR032799; IPR021109; IPR033121; IPR032861;	Xylanase inhibitor, C-terminal; Aspartic peptidase domain; Peptidase family A1 domain; Xylanase inhibitor, N-terminal;
Zm00001d036441_P001	zinc finger (C2H2 type) family protein	1.499	Up	0.0047036	mitochondria
Zm00001d031434_P001	DNA-damage-repair/toleration protein DRT100	1.498	Up	0.0146221	extracellular				IPR013210; IPR032675;	Leucine-rich repeat-containing N-terminal, plant-type; Leucine-rich repeat domain, L domain-like;
Zm00001d029047_P001	Receptor-like protein kinase FERONIA	1.498	Up	0.021799	plasma membrane				IPR000719; IPR001245; IPR013320; IPR024788; IPR011009;	Protein kinase domain; Serine-threonine/tyrosine-protein kinase catalytic domain; Concanavalin A-like lectin/glucanase domain; Malectin-like carbohydrate-binding domain; Protein kinase-like domain;
Zm00001d001978_P125	MAP3K epsilon protein kinase 1	1.496	Up	0.0165613	chloroplast				IPR011989; IPR016024;	Armadillo-like helical; Armadillo-type fold;
Zm00001d005708_P001	Protein EDS1	1.496	Up	0.0161162	nucleus	K18875	EDS1; enhanced disease susceptibility 1 protein	zma04626 Plant-pathogen interaction - Zea mays (maize);	IPR002921; IPR029058;	Fungal lipase-like domain; Alpha/Beta hydrolase fold;
Zm00001d021893_P002	ARM repeat superfamily protein	1.495	Up	0.000239	chloroplast	K20222			IPR034085; IPR011989; IPR016024;	TOG domain; Armadillo-like helical; Armadillo-type fold;
Zm00001d025692_P002	Eukaryotic translation initiation factor 4B	1.495	Up	0.0109404	chloroplast
Zm00001d013903_P002	protein GN=Expressed protein	1.493	Up	0.008497	nucleus
Zm00001d001812_P001	Rubisco Assembly Factor 1 Rubisco Accumulation Factor1 GN= raf1	1.492	Up	0.027005	chloroplast
Zm00001d051600_P010	Protein CROWDED NUCLEI 1	1.492	Up	0.0082988	nucleus
Zm00001d028733_P003	SNF1-related protein kinase catalytic subunit alpha KIN10	1.491	Up	0.014703	cytoplasm	K07198			IPR015940; IPR028375; IPR001772; IPR000719; IPR011009;	Ubiquitin-associated domain; KA1 domain/Ssp2, C-terminal; Kinase associated domain 1 (KA1); Protein kinase domain; Protein kinase-like domain;
Zm00001d038745_P006	SNF1-related protein kinase catalytic subunit alpha KIN10	1.49	Up	0.0168352	cytoplasm	K07198			IPR015940; IPR028375; IPR000719; IPR011009;	Ubiquitin-associated domain; KA1 domain/Ssp2, C-terminal; Protein kinase domain; Protein kinase-like domain;
Zm00001d029454_P008	Sterol-4-alpha-carboxylate 3-dehydrogenase%2C decarboxylating	1.488	Up	0.00196176	cytoplasm	K07748	E1.1.1.170; sterol-4alpha-carboxylate 3-dehydrogenase (decarboxylating) [EC:1.1.1.170]	zma01100 Metabolic pathways - Zea mays (maize); zma00100 Steroid biosynthesis - Zea mays (maize);	IPR003388; IPR002225; IPR016040;	Reticulon; 3-beta hydroxysteroid dehydrogenase/isomerase; NAD(P)-binding domain;
Zm00001d009247_P001	Rapid alkalinization factor 1	1.487	Up	0.00024036	extracellular
Zm00001d050496_P001	Ribosomal protein L2 family	1.487	Up	0.0077242	chloroplast				IPR008991; IPR012340; IPR022669; IPR022666; IPR014726; IPR014722;	Translation protein SH3-like domain; Nucleic acid-binding, OB-fold; Ribosomal protein L2, C-terminal; Ribosomal Proteins L2, RNA binding domain; Ribosomal protein L2, domain 3; Ribosomal protein L2 domain 2;
Zm00001d028801_P001	26S proteasome regulatory subunit 4 homolog A	1.484	Up	7.969e-05	cytoplasm	K03062	PSMC1; 26S proteasome regulatory subunit T2	zma03050 Proteasome - Zea mays (maize);	IPR003593; IPR003959; IPR027417;	AAA+ ATPase domain; ATPase, AAA-type, core; P-loop containing nucleoside triphosphate hydrolase;
Zm00001d018903_P001	Ribosomal protein L15	1.483	Up	0.048399	nucleus	K02877	RP-L15e; large subunit ribosomal protein L15e	zma03010 Ribosome - Zea mays (maize);	IPR012678; IPR024794;	Ribosomal protein L23/L15e core domain; Ribosomal protein L15e core domain;
Zm00001d046342_P001	kaurene oxidase2 GN= ko2	1.481	Up	0.0143401	endoplasmic reticulum	K04122	GA3; ent-kaurene oxidase [EC:1.14.14.86]	zma00904 Diterpenoid biosynthesis - Zea mays (maize); zma01110 Biosynthesis of secondary metabolites - Zea mays (maize); zma01100 Metabolic pathways - Zea mays (maize);
Zm00001d051980_P010	Clathrin interactor EPSIN 2	1.478	Up	0.00079649	nucleus	K12471	EPN; epsin	zma04144 Endocytosis - Zea mays (maize);	IPR013809; IPR008942;	ENTH domain; ENTH/VHS;
Zm00001d022586_P037	HEAT repeat-containing protein	1.478	Up	0.041544	nucleus	K06100	SYMPK; symplekin	zma03015 mRNA surveillance pathway - Zea mays (maize);	IPR022075;	Symplekin C-terminal;
Zm00001d035002_P001	"ferredoxin5 leaf protein, cDNA clone, distinct amino acid sequence compared to other ferredoxins, gene specific probe (aka pfd5) GN= fdx5"	1.477	Up	0.0057203	chloroplast	K02639	petF; ferredoxin	zma00195 Photosynthesis - Zea mays (maize);	IPR001041; IPR012675;	2Fe-2S ferredoxin-type iron-sulfur binding domain; Beta-grasp domain;
Zm00001d038151_P001	uncharacterized protein	1.477	Up	0.000140049	chloroplast				IPR032799; IPR021109; IPR033121; IPR032861; IPR033868;	Xylanase inhibitor, C-terminal; Aspartic peptidase domain; Peptidase family A1 domain; Xylanase inhibitor, N-terminal; Xylanase inhibitor I-like;
Zm00001d029028_P001	Calcium-binding protein CML42	1.477	Up	0.0097961	chloroplast	K13448	CML; calcium-binding protein CML	zma04626 Plant-pathogen interaction - Zea mays (maize);	IPR011992; IPR002048;	EF-hand domain pair; EF-hand domain;
Zm00001d004731_P002	Aldehyde dehydrogenase	1.476	Up	0.00112229	cytoplasm	K00128	ALDH; aldehyde dehydrogenase (NAD+) [EC:1.2.1.3]	zma00010 Glycolysis / Gluconeogenesis - Zea mays (maize); zma00410 beta-Alanine metabolism - Zea mays (maize); zma00071 Fatty acid degradation - Zea mays (maize); zma00340 Histidine metabolism - Zea mays (maize); zma00053 Ascorbate and aldarate metabolism - Zea mays (maize); zma01110 Biosynthesis of secondary metabolites - Zea mays (maize); zma00561 Glycerolipid metabolism - Zea mays (maize); zma…	IPR016161; IPR015590; IPR016162; IPR016163;	Aldehyde/histidinol dehydrogenase; Aldehyde dehydrogenase domain; Aldehyde dehydrogenase N-terminal domain; Aldehyde dehydrogenase, C-terminal;
Zm00001d033383_P002	hydroxymethylpyrimidine phosphate synthase1 GN= thic1	1.475	Up	0.028359	chloroplast	K03147	thiC; phosphomethylpyrimidine synthase [EC:4.1.99.17]	zma00730 Thiamine metabolism - Zea mays (maize); zma01100 Metabolic pathways - Zea mays (maize);
Zm00001d038756_P001	Protein LIKE COV 1	1.473	Up	0.0041361	plasma membrane
Zm00001d009708_P001	Putative calcium-dependent protein kinase family protein	1.473	Up	0.049465	mitochondria	K13412	CPK; calcium-dependent protein kinase [EC:2.7.11.1]	zma04626 Plant-pathogen interaction - Zea mays (maize);	IPR000719; IPR002048; IPR011992; IPR011009;	Protein kinase domain; EF-hand domain; EF-hand domain pair; Protein kinase-like domain;
Zm00001d027726_P007	Protein RRP6-like 2	1.472	Up	0.035323	cytoplasm	K12591	RRP6; exosome complex exonuclease RRP6 [EC:3.1.13.-]	zma03018 RNA degradation - Zea mays (maize);	IPR010997; IPR012337; IPR002121; IPR002562;	HRDC-like; Ribonuclease H-like domain; HRDC domain; 3'-5' exonuclease domain;
Zm00001d020984_P001	Probable sarcosine oxidase	1.47	Up	0.033963	chloroplast	K00306	PIPOX; sarcosine oxidase / L-pipecolate oxidase [EC:1.5.3.1 1.5.3.7]	zma00310 Lysine degradation - Zea mays (maize); zma01100 Metabolic pathways - Zea mays (maize); zma04146 Peroxisome - Zea mays (maize); zma00260 Glycine, serine and threonine metabolism - Zea mays (maize);	IPR006076; IPR023753;	FAD dependent oxidoreductase; FAD/NAD(P)-binding domain;
Zm00001d016408_P001	uncharacterized protein	1.468	Up	0.033164	mitochondria
Zm00001d031168_P001	Glycine-rich RNA-binding protein 2	1.466	Up	0.00089676	nucleus				IPR000504; IPR012677;	RNA recognition motif domain; Nucleotide-binding alpha-beta plait domain;
Zm00001d013444_P001	Protein CASP	1.465	Up	0.025183	cytoplasm	K09313			IPR012955;	CASP, C-terminal;
Zm00001d017840_P001	Delta(12)-fatty-acid desaturase	1.464	Up	0.0110424	cytoplasm				IPR021863; IPR005804;	Fatty acid desaturase, N-terminal; Fatty acid desaturase domain;
Zm00001d033850_P013	alpha tubulin1 mRNA expressed primarily in root tips and pollen GN= tua1	1.464	Up	9.7386e-05	cytoskeleton	K07374	TUBA; tubulin alpha	zma04145 Phagosome - Zea mays (maize);	IPR003008; IPR023123; IPR008280; IPR018316;	Tubulin/FtsZ, GTPase domain; Tubulin, C-terminal; Tubulin/FtsZ, C-terminal; Tubulin/FtsZ, 2-layer sandwich domain;
Zm00001d009858_P002	Trans-cinnamate 4-monooxygenase	1.463	Up	0.0073362	cytoplasm	K00487	CYP73A; trans-cinnamate 4-monooxygenase [EC:1.14.14.91]	zma00940 Phenylpropanoid biosynthesis - Zea mays (maize); zma01110 Biosynthesis of secondary metabolites - Zea mays (maize); zma01100 Metabolic pathways - Zea mays (maize); zma00945 Stilbenoid, diarylheptanoid and gingerol biosynthesis - Zea mays (maize); zma00130 Ubiquinone and other terpenoid-quinone biosynthesis - Zea mays (maize); zma00941 Flavonoid biosynthesis - Zea mays (maize); zma00360 P…
Zm00001d023220_P001	Outer membrane OMP85 family protein	1.462	Up	0.00084465	cytoplasm	K07277			IPR000184;	Bacterial surface antigen (D15);
Zm00001d002051_P001	D-3-phosphoglycerate dehydrogenase 3 chloroplastic	1.46	Up	0.0121778	chloroplast	K00058	serA; D-3-phosphoglycerate dehydrogenase / 2-oxoglutarate reductase [EC:1.1.1.95 1.1.1.399]	zma01230 Biosynthesis of amino acids - Zea mays (maize); zma01200 Carbon metabolism - Zea mays (maize); zma01100 Metabolic pathways - Zea mays (maize); zma00260 Glycine, serine and threonine metabolism - Zea mays (maize);	IPR006139; IPR006140; IPR029009; IPR002912; IPR016040; IPR015878;	D-isomer specific 2-hydroxyacid dehydrogenase, catalytic domain; D-isomer specific 2-hydroxyacid dehydrogenase, NAD-binding domain; Allosteric substrate binding domain; ACT domain; NAD(P)-binding domain; S-adenosyl-L-homocysteine hydrolase, NAD binding domain;
Zm00001d014906_P001	Phosphoinositide phospholipase C 4	1.457	Up	0.021663	chloroplast	K05857	PLCD; phosphatidylinositol phospholipase C, delta [EC:3.1.4.11]	zma04070 Phosphatidylinositol signaling system - Zea mays (maize); zma01100 Metabolic pathways - Zea mays (maize); zma00562 Inositol phosphate metabolism - Zea mays (maize); zma04933 AGE-RAGE signaling pathway in diabetic complications - Zea mays (maize);	IPR000909; IPR017946; IPR000008; IPR001711;	Phosphatidylinositol-specific phospholipase C, X domain; PLC-like phosphodiesterase, TIM beta/alpha-barrel domain; C2 domain; Phospholipase C, phosphatidylinositol-specific, Y domain;
Zm00001d045210_P001	Dirigent	1.457	Up	0.021178	cytoplasm
Zm00001d045725_P035	ARM repeat superfamily protein	1.457	Up	0.0054791	nucleus	K20224			IPR001494; IPR011989; IPR013598; IPR016024;	Importin-beta, N-terminal domain; Armadillo-like helical; Exportin-1/Importin-beta-like; Armadillo-type fold;
Zm00001d005461_P001	Protein transport protein SEC13 homolog B	1.457	Up	0.048759	cytoplasm	K14004	SEC13; protein transport protein SEC13	zma04141 Protein processing in endoplasmic reticulum - Zea mays (maize); zma03013 RNA transport - Zea mays (maize);	IPR017986; IPR015943;	WD40-repeat-containing domain; WD40/YVTN repeat-like-containing domain;
Zm00001d039354_P001	uncharacterized protein	1.456	Up	0.042738	cytoplasm
Zm00001d031937_P002	Peptidyl-prolyl cis-trans isomerase CYP18-2	1.456	Up	0.036864	cytoplasm	K12733	PPIL1; peptidyl-prolyl cis-trans isomerase-like 1 [EC:5.2.1.8]	zma03040 Spliceosome - Zea mays (maize);	IPR002130; IPR029000;	Cyclophilin-type peptidyl-prolyl cis-trans isomerase domain; Cyclophilin-like domain;
Zm00001d043517_P001	Peptidase M28 family protein	1.456	Up	0.0117157	chloroplast	K01301			IPR003137; IPR007484; IPR007365;	PA domain; Peptidase M28; Transferrin receptor-like, dimerisation domain;
Zm00001d034606_P001	Transcription factor IIS protein	1.452	Up	0.0037358	chloroplast	K03145			IPR017923; IPR003617; IPR001222; IPR003618;	Transcription factor IIS, N-terminal; Transcription elongation factor, TFIIS/CRSP70, N-terminal, sub-type; Zinc finger, TFIIS-type; Transcription elongation factor S-II, central domain;
Zm00001d019881_P002	Auxin transport protein BIG	1.45	Up	0.0074436	plasma membrane	K10691			IPR011989; IPR016024; IPR000433; IPR003126;	Armadillo-like helical; Armadillo-type fold; Zinc finger, ZZ-type; Zinc finger, UBR-type;
Zm00001d003317_P001	Leucine-rich repeat (LRR) family protein	1.45	Up	0.0060841	chloroplast				IPR032675;	Leucine-rich repeat domain, L domain-like;
Zm00001d028597_P006	Probable tRNA (guanine(26)-N(2))-dimethyltransferase 2	1.45	Up	0.0055026	cytoplasm	K00555			IPR029063;	S-adenosyl-L-methionine-dependent methyltransferase;
Zm00001d014812_P001	RNA-binding (RRM/RBD/RNP motifs) family protein	1.45	Up	0.004361	nucleus	K12897	TRA2; transformer-2 protein	zma03040 Spliceosome - Zea mays (maize);	IPR000504; IPR012677; IPR003954;	RNA recognition motif domain; Nucleotide-binding alpha-beta plait domain; RNA recognition motif domain, eukaryote;
Zm00001d010172_P003	Fructose-16-bisphosphatase cytosolic	1.449	Up	0.0081419	chloroplast	K03841	FBP; fructose-1,6-bisphosphatase I [EC:3.1.3.11]	zma00030 Pentose phosphate pathway - Zea mays (maize); zma00010 Glycolysis / Gluconeogenesis - Zea mays (maize); zma01200 Carbon metabolism - Zea mays (maize); zma01110 Biosynthesis of secondary metabolites - Zea mays (maize); zma01100 Metabolic pathways - Zea mays (maize); zma00051 Fructose and mannose metabolism - Zea mays (maize); zma00710 Carbon fixation in photosynthetic organisms - Zea mays…	IPR033391;	Fructose-1-6-bisphosphatase class I, N-terminal;
Zm00001d049892_P001	RNase H family protein	1.449	Up	0.0077606	cytoplasm				IPR009027; IPR012337; IPR011320; IPR002156;	Ribosomal protein L9/RNase H1, N-terminal; Ribonuclease H-like domain; Ribonuclease H1, N-terminal; Ribonuclease H domain;
Zm00001d028755_P002	Ran-binding protein 1 homolog a	1.447	Up	0.0042567	mitochondria	K15306			IPR000156; IPR011993;	Ran binding domain; PH domain-like;
Zm00001d028620_P001	Putative clathrin assembly protein	1.445	Up	0.023203	chloroplast				IPR013809; IPR008942; IPR014712; IPR011417;	ENTH domain; ENTH/VHS; Phosphoinositide-binding clathrin adaptor, domain 2; AP180 N-terminal homology (ANTH) domain;
Zm00001d032567_P014	Mediator of RNA polymerase II transcription subunit 16	1.444	Up	0.0103182	nucleus
Zm00001d009711_P001	uncharacterized protein	1.444	Up	0.00020434	chloroplast	K14684			IPR023395;	Mitochondrial carrier domain;
Zm00001d044434_P001	Probable inactive receptor kinase	1.443	Up	0.0020018	plasma membrane				IPR000719; IPR013210; IPR032675; IPR011009;	Protein kinase domain; Leucine-rich repeat-containing N-terminal, plant-type; Leucine-rich repeat domain, L domain-like; Protein kinase-like domain;
Zm00001d050225_P001	Thioredoxin domain-containing protein 9 homolog	1.443	Up	0.0057236	cytoplasm				IPR013766; IPR012336;	Thioredoxin domain; Thioredoxin-like fold;
Zm00001d002373_P013	26S proteasome non-ATPase regulatory subunit 1 homolog B	1.442	Up	0.02032	chloroplast	K03032	PSMD1; 26S proteasome regulatory subunit N2	zma03050 Proteasome - Zea mays (maize);	IPR011989; IPR016024;	Armadillo-like helical; Armadillo-type fold;
Zm00001d037352_P003	THO complex subunit 4C	1.442	Up	0.0165849	cytoplasm	K12881	THOC4; THO complex subunit 4	zma03015 mRNA surveillance pathway - Zea mays (maize); zma03040 Spliceosome - Zea mays (maize); zma03013 RNA transport - Zea mays (maize);	IPR000504; IPR012677;	RNA recognition motif domain; Nucleotide-binding alpha-beta plait domain;
Zm00001d037894_P001	Dehydrin DHN1	1.441	Up	0.020685	nucleus
Zm00001d009364_P001	Protein kinase and PP2C-like domain-containing protein	1.44	Up	2.3237e-05	cytoplasm				IPR000719; IPR001932; IPR011009;	Protein kinase domain; PPM-type phosphatase domain; Protein kinase-like domain;
Zm00001d019219_P003	ribosomal proteinS12 (homolog) endosperm cDNA 5C08C03 similar to rodent ribosomal protein GN= rps12	1.44	Up	0.0099244	chloroplast	K02951	RP-S12e; small subunit ribosomal protein S12e	zma03010 Ribosome - Zea mays (maize);	IPR029064; IPR004038;	50S ribosomal protein L30e-like; Ribosomal protein L7Ae/L30e/S12e/Gadd45;
Zm00001d004626_P001	Probable beta-D-xylosidase 7	1.438	Up	0.0119217	chloroplast				IPR002772; IPR001764; IPR026891; IPR017853;	Glycoside hydrolase family 3 C-terminal domain; Glycoside hydrolase, family 3, N-terminal; Fibronectin type III-like domain; Glycoside hydrolase superfamily;
Zm00001d008327_P001	H/ACA ribonucleoprotein complex subunit 4	1.438	Up	0.0048249	cytoplasm	K11131	DKC1; H/ACA ribonucleoprotein complex subunit 4 [EC:5.4.99.-]	zma03008 Ribosome biogenesis in eukaryotes - Zea mays (maize);	IPR020103; IPR015947; IPR002478; IPR032819; IPR004521; IPR012960; IPR002501;	Pseudouridine synthase, catalytic domain; PUA-like domain; PUA domain; tRNA pseudouridylate synthase B, C-terminal; Uncharacterised domain CHP00451; Dyskerin-like; Pseudouridine synthase II, N-terminal;
Zm00001d015186_P001	Glycosyltransferase family 61 protein	1.437	Up	0.027816	chloroplast
Zm00001d006573_P007	Eukaryotic translation initiation factor 4G	1.436	Up	0.00106158	nucleus	K03260	EIF4G; translation initiation factor 4G	zma03013 RNA transport - Zea mays (maize);	IPR003891; IPR003890; IPR016024; IPR016021;	Initiation factor eIF-4 gamma, MA3; MIF4G-like, type 3; Armadillo-type fold; MIF4G-like domain;
Zm00001d044646_P058	glucosamine fructose-6-phosphate aminotransferase1 endosperm cDNA 5C01G05 (uaz309) similar to rate limiting enzyme of hexosamine synthesis GN= gfa1	1.435	Up	0.0145399	chloroplast	K00820	glmS; glucosamine---fructose-6-phosphate aminotransferase (isomerizing) [EC:2.6.1.16]	zma00520 Amino sugar and nucleotide sugar metabolism - Zea mays (maize); zma01100 Metabolic pathways - Zea mays (maize); zma00250 Alanine, aspartate and glutamate metabolism - Zea mays (maize);	IPR001347; IPR029055; IPR017932;	Sugar isomerase (SIS); Nucleophile aminohydrolases, N-terminal; Glutamine amidotransferase type 2 domain;
Zm00001d014030_P001	Malate dehydrogenase cytoplasmic 1	1.434	Up	0.0186008	cytoplasm	K00025	MDH1; malate dehydrogenase [EC:1.1.1.37]	zma01200 Carbon metabolism - Zea mays (maize); zma01110 Biosynthesis of secondary metabolites - Zea mays (maize); zma01100 Metabolic pathways - Zea mays (maize); zma00020 Citrate cycle (TCA cycle) - Zea mays (maize); zma00630 Glyoxylate and dicarboxylate metabolism - Zea mays (maize); zma00710 Carbon fixation in photosynthetic organisms - Zea mays (maize); zma00620 Pyruvate metabolism - Zea mays …	IPR022383; IPR016040; IPR001236; IPR015955;	Lactate/malate dehydrogenase, C-terminal; NAD(P)-binding domain; Lactate/malate dehydrogenase, N-terminal; Lactate dehydrogenase/glycoside hydrolase, family 4, C-terminal;
Zm00001d041455_P001	Homocysteine S-methyltransferase 3	1.434	Up	0.033162	cytoplasm	K00547	mmuM; homocysteine S-methyltransferase [EC:2.1.1.10]	zma01110 Biosynthesis of secondary metabolites - Zea mays (maize); zma01100 Metabolic pathways - Zea mays (maize); zma00270 Cysteine and methionine metabolism - Zea mays (maize);	IPR003726;	Homocysteine-binding domain;
Zm00001d054107_P002	FAM10 family protein	1.434	Up	0.00121561	nucleus	K09560			IPR006636; IPR011990; IPR013026;	Heat shock chaperonin-binding; Tetratricopeptide-like helical domain; Tetratricopeptide repeat-containing domain;
Zm00001d047893_P003	phosphoenolpyruvate carboxykinase homolog2 syntenic with pck1 GN= pck2	1.433	Up	0.0051644	chloroplast	K01610	E4.1.1.49; phosphoenolpyruvate carboxykinase (ATP) [EC:4.1.1.49]	zma00010 Glycolysis / Gluconeogenesis - Zea mays (maize); zma01200 Carbon metabolism - Zea mays (maize); zma01110 Biosynthesis of secondary metabolites - Zea mays (maize); zma01100 Metabolic pathways - Zea mays (maize); zma00020 Citrate cycle (TCA cycle) - Zea mays (maize); zma00710 Carbon fixation in photosynthetic organisms - Zea mays (maize); zma00620 Pyruvate metabolism - Zea mays (maize);	IPR008210; IPR013035;	Phosphoenolpyruvate carboxykinase, N-terminal; Phosphoenolpyruvate carboxykinase, C-terminal;
Zm00001d053698_P002	uncharacterized protein	1.432	Up	0.0111423	nucleus
Zm00001d020530_P001	hydroxycinnamoyltransferase11 GN= hct11	1.431	Up	0.0087046	cytoplasm	K13065	E2.3.1.133; shikimate O-hydroxycinnamoyltransferase [EC:2.3.1.133]	zma00940 Phenylpropanoid biosynthesis - Zea mays (maize); zma01110 Biosynthesis of secondary metabolites - Zea mays (maize); zma01100 Metabolic pathways - Zea mays (maize); zma00945 Stilbenoid, diarylheptanoid and gingerol biosynthesis - Zea mays (maize); zma00941 Flavonoid biosynthesis - Zea mays (maize);	IPR023213;	Chloramphenicol acetyltransferase-like domain;
Zm00001d048655_P014	mRNA splicing factor1 leaf cDNA csu363 similar to animal mRNA splicing factor GN= msf1	1.43	Up	0.000196646	cytoplasm	K12837	U2AF2; splicing factor U2AF 65 kDa subunit	zma03040 Spliceosome - Zea mays (maize);	IPR000504; IPR012677; IPR003954;	RNA recognition motif domain; Nucleotide-binding alpha-beta plait domain; RNA recognition motif domain, eukaryote;
Zm00001d009005_P003	VHS domain-containing protein	1.43	Up	0.0063795	nucleus				IPR002014; IPR013809; IPR016024; IPR008942;	VHS domain; ENTH domain; Armadillo-type fold; ENTH/VHS;
Zm00001d041105_P004	E3 ubiquitin-protein ligase UPL1	1.43	Up	0.043321	cytoplasm	K10592	HUWE1; E3 ubiquitin-protein ligase HUWE1 [EC:2.3.2.26]	zma04120 Ubiquitin mediated proteolysis - Zea mays (maize);	IPR015940; IPR010314; IPR025527; IPR016024; IPR010309; IPR000569; IPR009060;	Ubiquitin-associated domain; E3 ubiquitin ligase, domain of unknown function DUF913; Domain of unknown function DUF4414; Armadillo-type fold; E3 ubiquitin ligase, domain of unknown function DUF908; HECT domain; UBA-like;
Zm00001d004617_P001	uncharacterized protein	1.428	Up	0.0171209	nucleus				IPR011032;	GroES-like;
Zm00001d047638_P001	Calcium-dependent phosphotriesterase superfamily protein	1.427	Up	0.0187754	cytoplasm				IPR011042;	Six-bladed beta-propeller, TolB-like;
Zm00001d026269_P001	Probable protein phosphatase 2C 9	1.425	Up	0.036175	cytoplasm	K17506			IPR001932;	PPM-type phosphatase domain;
Zm00001d005926_P001	Threonine endopeptidase	1.423	Up	0.025161	chloroplast				IPR025564;	Cyanobacterial aminoacyl-tRNA synthetase, CAAD domain;
Zm00001d017153_P005	LUC7 related protein	1.422	Up	0.0040042	nucleus
Zm00001d003533_P001	Lipoxygenase	1.422	Up	0.005376	chloroplast	K00454	LOX2S; lipoxygenase [EC:1.13.11.12]	zma00592 alpha-Linolenic acid metabolism - Zea mays (maize); zma01110 Biosynthesis of secondary metabolites - Zea mays (maize); zma01100 Metabolic pathways - Zea mays (maize); zma00591 Linoleic acid metabolism - Zea mays (maize);	IPR027433; IPR001024; IPR013819;	Lipoxygenase, domain 3; PLAT/LH2 domain; Lipoxygenase, C-terminal;
Zm00001d042939_P001	Metal tolerance protein 11	1.422	Up	0.0120188	cytoplasm				IPR027470; IPR027469;	Cation efflux protein, cytoplasmic domain; Cation efflux protein transmembrane domain;
Zm00001d040163_P002	deoxy xylulose reductoisomerase1 enzyme catalyzes the first committed step of the plastidial pathway to apocarotenoids during mycorrhizal establishment GN= dxr1	1.421	Up	0.021104	cytoplasm	K00099	dxr; 1-deoxy-D-xylulose-5-phosphate reductoisomerase [EC:1.1.1.267]	zma00900 Terpenoid backbone biosynthesis - Zea mays (maize); zma01110 Biosynthesis of secondary metabolites - Zea mays (maize); zma01100 Metabolic pathways - Zea mays (maize);	IPR013512; IPR016040; IPR013644; IPR026877;	1-deoxy-D-xylulose 5-phosphate reductoisomerase, N-terminal; NAD(P)-binding domain; 1-deoxy-D-xylulose 5-phosphate reductoisomerase, C-terminal; DXP reductoisomerase C-terminal domain;
Zm00001d026036_P002	AT-hook motif nuclear-localized protein 13	1.421	Up	0.04796	nucleus
Zm00001d038740_P002	uncharacterized protein	1.42	Up	0.024699	chloroplast
Zm00001d052702_P001	Biotin synthase	1.42	Up	0.0067626	mitochondria	K01012	bioB; biotin synthase [EC:2.8.1.6]	zma00780 Biotin metabolism - Zea mays (maize); zma01100 Metabolic pathways - Zea mays (maize);	IPR010722; IPR013785; IPR006638; IPR007197;	Biotin and thiamin synthesis-associated domain; Aldolase-type TIM barrel; Elongator protein 3/MiaB/NifB; Radical SAM;
Zm00001d035646_P001	Putative DUF26 domain family protein	1.419	Up	0.0082625	chloroplast				IPR002902;	Gnk2-homologous domain;
Zm00001d034493_P001	Riboflavin kinase family protein	1.418	Up	0.022323	chloroplast	K22949	RIBF; FAD synthetase [EC:2.7.7.2]	zma01110 Biosynthesis of secondary metabolites - Zea mays (maize); zma01100 Metabolic pathways - Zea mays (maize); zma00740 Riboflavin metabolism - Zea mays (maize);	IPR014729; IPR015864;	Rossmann-like alpha/beta/alpha sandwich fold; FAD synthetase;
Zm00001d047362_P013	Tobamovirus multiplication protein 3	1.418	Up	0.039477	plasma membrane				IPR009457;	Domain of unknown function DUF1084;
Zm00001d014961_P001	Tetratricopeptide repeat (TPR)-like superfamily protein	1.418	Up	0.020458	chloroplast				IPR011990; IPR013026;	Tetratricopeptide-like helical domain; Tetratricopeptide repeat-containing domain;
Zm00001d035975_P001	Chaperone protein dnaJ GFA2 mitochondrial	1.417	Up	0.0107169	chloroplast	K03686			IPR008971; IPR002939; IPR001623; IPR001305;	HSP40/DnaJ peptide-binding; Chaperone DnaJ, C-terminal; DnaJ domain; Heat shock protein DnaJ, cysteine-rich domain;
Zm00001d037232_P001	ATP-dependent zinc metalloprotease FTSH 6 chloroplastic	1.416	Up	0.0116361	chloroplast	K03798			IPR003959; IPR003593; IPR000642; IPR027417;	ATPase, AAA-type, core; AAA+ ATPase domain; Peptidase M41; P-loop containing nucleoside triphosphate hydrolase;
Zm00001d023811_P001	Pathogenesis-related protein STH-21	1.415	Up	0.0134396	cytoplasm				IPR000916; IPR023393;	Bet v I/Major latex protein; START-like domain;
Zm00001d031688_P002	Putative 14-3-3 protein	1.414	Up	0.0130445	plasma membrane	K06630			IPR023410;	14-3-3 domain;
Zm00001d020325_P001	Putative potassium transporter 12	1.414	Up	0.0079554	plasma membrane	K03549
Zm00001d002184_P001	Peroxisome biogenesis protein 22	1.411	Up	0.020715	chloroplast
Zm00001d024734_P001	Peroxidase 2	1.41	Up	0.0083045	chloroplast	K00430	E1.11.1.7; peroxidase [EC:1.11.1.7]	zma00940 Phenylpropanoid biosynthesis - Zea mays (maize); zma01110 Biosynthesis of secondary metabolites - Zea mays (maize); zma01100 Metabolic pathways - Zea mays (maize);	IPR033905; IPR002016;	Secretory peroxidase; Haem peroxidase, plant/fungal/bacterial;
Zm00001d002434_P001	alternative oxidase3 GN= aox3	1.409	Up	0.025501	chloroplast	K17893
Zm00001d052776_P001	VAMP protein SEC22	1.409	Up	0.00075829	chloroplast				IPR004864;	Late embryogenesis abundant protein, LEA-14;
Zm00001d048308_P002	Putative thaumatin domain family protein	1.407	Up	0.0094432	chloroplast	K14297	NUP98; nuclear pore complex protein Nup98-Nup96	zma03013 RNA transport - Zea mays (maize);	IPR007230; IPR021967;	Peptidase S59, nucleoporin; Nuclear protein 96;
Zm00001d026368_P001	Thioredoxin-like protein CXXS1	1.407	Up	0.020959	cytoplasm	K03671			IPR012336; IPR013766;	Thioredoxin-like fold; Thioredoxin domain;
Zm00001d047977_P004	Transmembrane 9 superfamily member 4	1.404	Up	0.00128256	plasma membrane	K17085			IPR020846;	Major facilitator superfamily domain;
Zm00001d039330_P002	V-type proton ATPase subunit E3	1.404	Up	0.0199615	cytoplasm	K02150	ATPeV1E; V-type H+-transporting ATPase subunit E	zma04145 Phagosome - Zea mays (maize); zma00190 Oxidative phosphorylation - Zea mays (maize); zma01100 Metabolic pathways - Zea mays (maize);
Zm00001d040670_P004	Lipoamide acyltransferase component of branched-chain alpha-keto acid dehydrogenase complex mitochondrial	1.404	Up	0.045515	mitochondria	K09699	DBT; 2-oxoisovalerate dehydrogenase E2 component (dihydrolipoyl transacylase) [EC:2.3.1.168]	zma00640 Propanoate metabolism - Zea mays (maize); zma01110 Biosynthesis of secondary metabolites - Zea mays (maize); zma01100 Metabolic pathways - Zea mays (maize); zma00280 Valine, leucine and isoleucine degradation - Zea mays (maize);	IPR004167; IPR001078; IPR011053; IPR000089; IPR023213;	E3-binding domain; 2-oxoacid dehydrogenase acyltransferase, catalytic domain; Single hybrid motif; Biotin/lipoyl attachment; Chloramphenicol acetyltransferase-like domain;
Zm00001d040667_P002	UDP-glucuronic acid decarboxylase 4	1.404	Up	0.023199	chloroplast	K08678	UXS1; UDP-glucuronate decarboxylase [EC:4.1.1.35]	zma00520 Amino sugar and nucleotide sugar metabolism - Zea mays (maize); zma01100 Metabolic pathways - Zea mays (maize);	IPR016040;	NAD(P)-binding domain;
Zm00001d035899_P001	Pectin lyase-like superfamily protein	1.404	Up	0.0175966	chloroplast				IPR011050; IPR012334;	Pectin lyase fold/virulence factor; Pectin lyase fold;
Zm00001d019299_P002	Protein CIA1	1.403	Up	0.042999	chloroplast				IPR017986; IPR015943;	WD40-repeat-containing domain; WD40/YVTN repeat-like-containing domain;
Zm00001d013219_P001	Arginine N-methyltransferase 2	1.402	Up	0.045955	cytoplasm	K18477			IPR026480; IPR020683; IPR029063;	Arginine N-methyltransferase 2-like domain; Ankyrin repeat-containing domain; S-adenosyl-L-methionine-dependent methyltransferase;
Zm00001d033862_P001	1-aminocyclopropane-1-carboxylate synthase6 GN= acs6	1.402	Up	0.035878	cytoplasm	K01762	ACS; 1-aminocyclopropane-1-carboxylate synthase [EC:4.4.1.14]	zma01110 Biosynthesis of secondary metabolites - Zea mays (maize); zma01100 Metabolic pathways - Zea mays (maize); zma00270 Cysteine and methionine metabolism - Zea mays (maize);	IPR015424; IPR004839; IPR015422; IPR015421;	Pyridoxal phosphate-dependent transferase; Aminotransferase, class I/classII; Pyridoxal phosphate-dependent transferase, major region, subdomain 2; Pyridoxal phosphate-dependent transferase, major region, subdomain 1;
Zm00001d038127_P001	Probable E3 ubiquitin-protein ligase LUL4	1.402	Up	0.00085538	nucleus				IPR001841; IPR013083;	Zinc finger, RING-type; Zinc finger, RING/FYVE/PHD-type;
Zm00001d027366_P002	peroxisomal membrane protein homolog1 GN= pmp1	1.401	Up	0.046536	plasma membrane
Zm00001d009714_P002	Jasmonic acid-amido synthetase JAR1	1.4	Up	0.0146392	nucleus	K14506	JAR1_4_6; jasmonic acid-amino synthetase [EC:6.3.2.52]	zma04075 Plant hormone signal transduction - Zea mays (maize);
Zm00001d046533_P008	nucleoporin-related	1.399	Up	0.030218	nucleus
Zm00001d042697_P002	photosystem II subunit PsbS1 subunit elicits defense against destructive effects of excess absorbed light energy GN= psbs1	1.398	Up	0.0103206	chloroplast	K03542	psbS; photosystem II 22kDa protein	zma01100 Metabolic pathways - Zea mays (maize); zma00195 Photosynthesis - Zea mays (maize);	IPR023329;	Chlorophyll a/b binding protein domain;
Zm00001d047218_P001	Cytochrome c oxidase subunit 6b-1	1.396	Up	0.0142637	mitochondria	K02267	COX6B; cytochrome c oxidase subunit 6b	zma00190 Oxidative phosphorylation - Zea mays (maize); zma01100 Metabolic pathways - Zea mays (maize);
Zm00001d015754_P037	Nuclear pore complex protein NUP205	1.393	Up	0.03976	plasma membrane	K14310	NUP205; nuclear pore complex protein Nup205	zma03013 RNA transport - Zea mays (maize);
Zm00001d023243_P004	2-isopropylmalate synthase 1 chloroplastic	1.391	Up	0.0025994	chloroplast	K01649	leuA; 2-isopropylmalate synthase [EC:2.3.3.13]	zma01230 Biosynthesis of amino acids - Zea mays (maize); zma01110 Biosynthesis of secondary metabolites - Zea mays (maize); zma01100 Metabolic pathways - Zea mays (maize); zma01210 2-Oxocarboxylic acid metabolism - Zea mays (maize); zma00290 Valine, leucine and isoleucine biosynthesis - Zea mays (maize); zma00620 Pyruvate metabolism - Zea mays (maize);	IPR013785; IPR013709; IPR000891;	Aldolase-type TIM barrel; 2-isopropylmalate synthase LeuA, allosteric (dimerisation) domain; Pyruvate carboxyltransferase;
Zm00001d031481_P001	AT-hook motif nuclear-localized protein 10	1.389	Up	0.036941	nucleus				IPR005175;	PPC domain;
Zm00001d022032_P001	ribosome-inactivating protein2 genomic sequence produces RIP protein in E. coli GN= rip2	1.388	Up	2.4157e-06	cytoplasm				IPR016138;	Ribosome-inactivating protein, subdomain 1;
Zm00001d012314_P001	Nuclear pore complex protein NUP62	1.388	Up	0.0171434	chloroplast	K14306	NUP62; nuclear pore complex protein Nup62	zma03013 RNA transport - Zea mays (maize);	IPR007758;	Nucleoporin, NSP1-like, C-terminal;
Zm00001d003857_P001	"calnexin homolog1 low copy number, leaf cDNA csu148, similar to Arabidopsis calnexin GN= clx1"	1.388	Up	0.00048249	plasma membrane	K08054	CANX; calnexin	zma04145 Phagosome - Zea mays (maize); zma04141 Protein processing in endoplasmic reticulum - Zea mays (maize);	IPR009033; IPR013320;	Calreticulin/calnexin, P domain; Concanavalin A-like lectin/glucanase domain;
Zm00001d028903_P001	heme binding	1.387	Up	0.0067649	plasma membrane				IPR019020;	Cytochrome c-552/DMSO reductase-like, haem-binding domain;
Zm00001d009446_P001	uncharacterized protein	1.386	Up	0.039764	mitochondria
Zm00001d002693_P001	U-box domain-containing protein 33	1.386	Up	0.0133793	chloroplast				IPR003613; IPR000719; IPR013083; IPR001245; IPR013320; IPR011009;	U box domain; Protein kinase domain; Zinc finger, RING/FYVE/PHD-type; Serine-threonine/tyrosine-protein kinase catalytic domain; Concanavalin A-like lectin/glucanase domain; Protein kinase-like domain;
Zm00001d047389_P006	zinc knuckle (CCHC-type) family protein	1.386	Up	0.00118028	nucleus	K09250			IPR001878;	Zinc finger, CCHC-type;
Zm00001d052951_P001	XS domain containing protein expressed	1.385	Up	0.026641	chloroplast				IPR005380;	XS domain;
Zm00001d037693_P002	Malic enzyme	1.385	Up	0.005715	chloroplast	K00029	E1.1.1.40; malate dehydrogenase (oxaloacetate-decarboxylating)(NADP+) [EC:1.1.1.40]	zma01200 Carbon metabolism - Zea mays (maize); zma01100 Metabolic pathways - Zea mays (maize); zma00710 Carbon fixation in photosynthetic organisms - Zea mays (maize); zma00620 Pyruvate metabolism - Zea mays (maize);	IPR012302; IPR012301; IPR016040;	Malic enzyme, NAD-binding; Malic enzyme, N-terminal domain; NAD(P)-binding domain;
Zm00001d035772_P002	Peroxisomal membrane protein PEX14	1.385	Up	0.0099369	plasma membrane	K13343	PEX14; peroxin-14	zma04146 Peroxisome - Zea mays (maize);	IPR006785;	Peroxisome membrane anchor protein Pex14p, N-terminal;
Zm00001d015399_P001	Choline-phosphate cytidylyltransferase 2	1.385	Up	0.025984	chloroplast	K00968	PCYT1; choline-phosphate cytidylyltransferase [EC:2.7.7.15]	zma01100 Metabolic pathways - Zea mays (maize); zma00440 Phosphonate and phosphinate metabolism - Zea mays (maize); zma00564 Glycerophospholipid metabolism - Zea mays (maize);	IPR014729; IPR004821;	Rossmann-like alpha/beta/alpha sandwich fold; Cytidyltransferase-like domain;
Zm00001d031088_P001	Serine/threonine-protein phosphatase	1.384	Up	0.023884	cytoskeleton				IPR029052; IPR004843; IPR015915; IPR006186;	Metallo-dependent phosphatase-like; Calcineurin-like phosphoesterase domain, ApaH type; Kelch-type beta propeller; Serine/threonine-specific protein phosphatase/bis(5-nucleosyl)-tetraphosphatase;
Zm00001d049674_P002	60S acidic ribosomal protein P1-3	1.384	Up	0.011804	cytoplasm	K02942	RP-LP1; large subunit ribosomal protein LP1	zma03010 Ribosome - Zea mays (maize);
Zm00001d032992_P001	Pectinesterase 31	1.382	Up	0.0012218	cytoplasm	K01051	E3.1.1.11; pectinesterase [EC:3.1.1.11]	zma01100 Metabolic pathways - Zea mays (maize); zma00040 Pentose and glucuronate interconversions - Zea mays (maize);	IPR011050; IPR000070; IPR012334;	Pectin lyase fold/virulence factor; Pectinesterase, catalytic; Pectin lyase fold;
Zm00001d042264_P001	Aspartokinase 1 chloroplastic	1.382	Up	0.0065968	chloroplast	K00928	lysC; aspartate kinase [EC:2.7.2.4]	zma01230 Biosynthesis of amino acids - Zea mays (maize); zma00300 Lysine biosynthesis - Zea mays (maize); zma01110 Biosynthesis of secondary metabolites - Zea mays (maize); zma01100 Metabolic pathways - Zea mays (maize); zma00261 Monobactam biosynthesis - Zea mays (maize); zma01210 2-Oxocarboxylic acid metabolism - Zea mays (maize); zma00260 Glycine, serine and threonine metabolism - Zea mays (ma…	IPR001048; IPR001341;	Aspartate/glutamate/uridylate kinase; Aspartate kinase domain;
Zm00001d032652_P001	Metal-dependent phosphohydrolase	1.379	Up	0.0051771	chloroplast	K06950			IPR006674; IPR003607;	HD domain; HD/PDEase domain;
Zm00001d054043_P007	"Binding protein homolog2 cDNA, SSR umc1058 GN=bip2"	1.378	Up	0.00055948	endoplasmic reticulum	K09490	HSPA5; heat shock 70kDa protein 5	zma03060 Protein export - Zea mays (maize); zma04141 Protein processing in endoplasmic reticulum - Zea mays (maize);	IPR029048; IPR029047;	Heat shock protein 70kD, C-terminal domain; Heat shock protein 70kD, peptide-binding domain;
Zm00001d046400_P002	Adenine nucleotide transporter BT1 chloroplastic/mitochondrial	1.376	Up	0.025139	chloroplast				IPR023395;	Mitochondrial carrier domain;
Zm00001d005636_P002	Proton pump-interactor 1	1.375	Up	0.029723	cytoplasm
Zm00001d007892_P002	2-oxoisovalerate dehydrogenase subunit beta 1 mitochondrial	1.375	Up	0.0081597	cytoplasm	K00167	BCKDHB; 2-oxoisovalerate dehydrogenase E1 component beta subunit [EC:1.2.4.4]	zma00640 Propanoate metabolism - Zea mays (maize); zma01110 Biosynthesis of secondary metabolites - Zea mays (maize); zma01100 Metabolic pathways - Zea mays (maize); zma00280 Valine, leucine and isoleucine degradation - Zea mays (maize);	IPR009014; IPR033248; IPR029061; IPR005475;	Transketolase C-terminal/Pyruvate-ferredoxin oxidoreductase domain II; Transketolase, C-terminal domain; Thiamin diphosphate-binding fold; Transketolase-like, pyrimidine-binding domain;
Zm00001d026652_P001	DNA binding protein	1.375	Up	0.0072643	nucleus				IPR005175;	PPC domain;
Zm00001d006565_P002	male sterile32 like ms1 GN= ms32	1.374	Up	0.037835	cytoplasm	K02144	ATPeV1H; V-type H+-transporting ATPase subunit H	zma04145 Phagosome - Zea mays (maize); zma00190 Oxidative phosphorylation - Zea mays (maize); zma01100 Metabolic pathways - Zea mays (maize);	IPR011987; IPR011989; IPR016024;	ATPase, V1 complex, subunit H, C-terminal; Armadillo-like helical; Armadillo-type fold;
Zm00001d040244_P001	pathogenesis-related family protein	1.37	Up	0.0024558	cytoplasm				IPR032710;	NTF2-like domain;
Zm00001d021189_P001	Probable transcription factor PosF21	1.368	Up	0.045122	nucleus				IPR004827;	Basic-leucine zipper domain;
Zm00001d030584_P001	DROUGHT SENSITIVE 1	1.367	Up	0.025461	nucleus				IPR017986; IPR015943;	WD40-repeat-containing domain; WD40/YVTN repeat-like-containing domain;
Zm00001d050409_P001	Malate dehydrogenase	1.367	Up	0.023921	chloroplast	K00026	MDH2; malate dehydrogenase [EC:1.1.1.37]	zma01200 Carbon metabolism - Zea mays (maize); zma01110 Biosynthesis of secondary metabolites - Zea mays (maize); zma01100 Metabolic pathways - Zea mays (maize); zma00020 Citrate cycle (TCA cycle) - Zea mays (maize); zma00630 Glyoxylate and dicarboxylate metabolism - Zea mays (maize); zma00710 Carbon fixation in photosynthetic organisms - Zea mays (maize); zma00620 Pyruvate metabolism - Zea mays …	IPR022383; IPR016040; IPR001236; IPR015955;	Lactate/malate dehydrogenase, C-terminal; NAD(P)-binding domain; Lactate/malate dehydrogenase, N-terminal; Lactate dehydrogenase/glycoside hydrolase, family 4, C-terminal;
Zm00001d003190_P001	Endochitinase A	1.366	Up	0.0003238	extracellular	K01183	E3.2.1.14; chitinase [EC:3.2.1.14]	zma00520 Amino sugar and nucleotide sugar metabolism - Zea mays (maize); zma01100 Metabolic pathways - Zea mays (maize);	IPR023346; IPR000726; IPR001002;	Lysozyme-like domain; Glycoside hydrolase, family 19, catalytic; Chitin-binding, type 1;
Zm00001d045418_P001	Peptide methionine sulfoxide reductase A5	1.366	Up	0.0005957	chloroplast	K07304			IPR002569;	Peptide methionine sulphoxide reductase MsrA;
Zm00001d039411_P013	Coatomer subunit alpha-1	1.366	Up	0.00094451	mitochondria	K05236			IPR006692; IPR017986; IPR015943; IPR010714;	Coatomer, WD associated region; WD40-repeat-containing domain; WD40/YVTN repeat-like-containing domain; Coatomer, alpha subunit, C-terminal;
Zm00001d035817_P001	Protein kinase superfamily protein with octicosapeptide/Phox/Bem1p domain	1.364	Up	0.0051385	nucleus				IPR000270; IPR000719; IPR001245; IPR011009;	PB1 domain; Protein kinase domain; Serine-threonine/tyrosine-protein kinase catalytic domain; Protein kinase-like domain;
Zm00001d021835_P006	Calcium-dependent protein kinase 7	1.364	Up	0.039305	cytoplasm	K13412	CPK; calcium-dependent protein kinase [EC:2.7.11.1]	zma04626 Plant-pathogen interaction - Zea mays (maize);	IPR000719; IPR011009;	Protein kinase domain; Protein kinase-like domain;
Zm00001d012776_P001	dehydrin7 GN= dhn7	1.363	Up	0.00063643	plasma membrane				IPR003388;	Reticulon;
Zm00001d018413_P019	Molecular chaperone Hsp40/DnaJ family protein	1.362	Up	0.025362	extracellular	K01358			IPR029045;	ClpP/crotonase-like domain;
Zm00001d011302_P001	Os01g0606100 protein	1.36	Up	0.0058999	chloroplast				IPR011042;	Six-bladed beta-propeller, TolB-like;
Zm00001d007154_P001	60S ribosomal protein L22-2	1.359	Up	0.0026641	cytoplasm	K02891	RP-L22e; large subunit ribosomal protein L22e	zma03010 Ribosome - Zea mays (maize);
Zm00001d039211_P005	Notchless-like protein isoform 1%3B Notchless-like protein isoform 2	1.358	Up	0.036845	nucleus	K14855			IPR012972; IPR017986; IPR015943; IPR001632;	NLE; WD40-repeat-containing domain; WD40/YVTN repeat-like-containing domain; G-protein, beta subunit;
Zm00001d032893_P001	Small heat shock-like protein	1.358	Up	0.030936	cytoplasm				IPR002068; IPR008978;	Alpha crystallin/Hsp20 domain; HSP20-like chaperone;
Zm00001d033932_P001	uncharacterized protein	1.358	Up	0.04878	endoplasmic reticulum
Zm00001d024635_P006	Chaperone protein dnaJ A6 chloroplastic	1.357	Up	0.035498	nucleus	K03686			IPR008971; IPR002939; IPR001305;	HSP40/DnaJ peptide-binding; Chaperone DnaJ, C-terminal; Heat shock protein DnaJ, cysteine-rich domain;
Zm00001d034893_P004	SNARE-like superfamily protein	1.356	Up	0.0170803	cytoplasm				IPR011012;	Longin-like domain;
Zm00001d023694_P007	2-oxoisovalerate dehydrogenase subunit alpha 2 mitochondrial	1.355	Up	0.029419	cytoplasm	K00166	BCKDHA; 2-oxoisovalerate dehydrogenase E1 component alpha subunit [EC:1.2.4.4]	zma00640 Propanoate metabolism - Zea mays (maize); zma01110 Biosynthesis of secondary metabolites - Zea mays (maize); zma01100 Metabolic pathways - Zea mays (maize); zma00280 Valine, leucine and isoleucine degradation - Zea mays (maize);	IPR029061; IPR001017;	Thiamin diphosphate-binding fold; Dehydrogenase, E1 component;
Zm00001d030012_P002	Probable methyltransferase PMT14	1.354	Up	0.035718	chloroplast				IPR029063;	S-adenosyl-L-methionine-dependent methyltransferase;
Zm00001d027441_P001	?? probed with an oat leaf cDNA. GN= cdo1081a	1.353	Up	0.0171183	chloroplast				IPR011050; IPR012334;	Pectin lyase fold/virulence factor; Pectin lyase fold;
Zm00001d046184_P001	Peroxidase 52	1.353	Up	0.0066773	chloroplast	K00430	E1.11.1.7; peroxidase [EC:1.11.1.7]	zma00940 Phenylpropanoid biosynthesis - Zea mays (maize); zma01110 Biosynthesis of secondary metabolites - Zea mays (maize); zma01100 Metabolic pathways - Zea mays (maize);	IPR033905; IPR002016;	Secretory peroxidase; Haem peroxidase, plant/fungal/bacterial;
Zm00001d041716_P006	Syntaxin-132	1.351	Up	1.80435e-05	cytoplasm,nucleus	K08486	STX1B_2_3; syntaxin 1B/2/3	zma04130 SNARE interactions in vesicular transport - Zea mays (maize);	IPR000727; IPR010989; IPR006011;	Target SNARE coiled-coil homology domain; SNARE; Syntaxin, N-terminal domain;
Zm00001d040290_P003	Epoxide hydrolase 2	1.35	Up	0.00168113	cytoplasm				IPR029058; IPR000073;	Alpha/Beta hydrolase fold; Alpha/beta hydrolase fold-1;
Zm00001d025160_P001	60S ribosomal protein L35	1.349	Up	0.0092617	cytoplasm	K02918	RP-L35e; large subunit ribosomal protein L35e	zma03010 Ribosome - Zea mays (maize);
Zm00001d009014_P003	KH domain-containing protein HEN4	1.348	Up	0.0033821	mitochondria	K21444			IPR004087; IPR004088;	K Homology domain; K Homology domain, type 1;
Zm00001d053908_P001	Cold shock protein 2	1.348	Up	0.019143	nucleus	K09250			IPR011129; IPR012340; IPR001878; IPR002059;	Cold shock domain; Nucleic acid-binding, OB-fold; Zinc finger, CCHC-type; Cold-shock protein, DNA-binding;
Zm00001d026681_P001	from the Czech 'roh' meaning 'corner'	1.347	Up	0.025596	chloroplast
Zm00001d006900_P004	Phospho-2-dehydro-3-deoxyheptonate aldolase 2 chloroplastic	1.345	Up	0.0075972	chloroplast	K01626	E2.5.1.54; 3-deoxy-7-phosphoheptulonate synthase [EC:2.5.1.54]	zma01230 Biosynthesis of amino acids - Zea mays (maize); zma01110 Biosynthesis of secondary metabolites - Zea mays (maize); zma01100 Metabolic pathways - Zea mays (maize); zma00400 Phenylalanine, tyrosine and tryptophan biosynthesis - Zea mays (maize);
Zm00001d013335_P003	Endoplasmic reticulum oxidoreductin-1	1.345	Up	0.0102381	chloroplast	K10950	ERO1L; ERO1-like protein alpha [EC:1.8.4.-]	zma04141 Protein processing in endoplasmic reticulum - Zea mays (maize);
Zm00001d053228_P003	Acyl carrier protein	1.344	Up	0.00084195	chloroplast				IPR009081;	Phosphopantetheine binding ACP domain;
Zm00001d016406_P022	NSP (nuclear shuttle protein)-interacting GTPase	1.342	Up	0.0064408	nucleus
Zm00001d014325_P001	Calcium-binding EF-hand family protein	1.34	Up	0.0034823	cytoplasm				IPR011992; IPR002048;	EF-hand domain pair; EF-hand domain;
Zm00001d051881_P009	Protein BTR1	1.338	Up	0.00060119	cytoplasm	K14944			IPR004087; IPR004088;	K Homology domain; K Homology domain, type 1;
Zm00001d017544_P004	Pseudouridine synthase family protein	1.337	Up	0.0165572	nucleus	K06173			IPR020094; IPR020103; IPR020097; IPR020095;	Pseudouridine synthase I, TruA, N-terminal; Pseudouridine synthase, catalytic domain; Pseudouridine synthase I, TruA, alpha/beta domain; Pseudouridine synthase I, TruA, C-terminal;
Zm00001d041778_P005	AP-2 complex subunit sigma	1.336	Up	0.0020183	mitochondria	K11827	AP2S1; AP-2 complex subunit sigma-1	zma04144 Endocytosis - Zea mays (maize);	IPR011012; IPR022775;	Longin-like domain; AP complex, mu/sigma subunit;
Zm00001d010675_P001	Metacaspase-6	1.333	Up	0.0110977	cytoplasm				IPR029030;	Caspase-like domain;
Zm00001d037246_P001	Defective in cullin neddylation protein	1.333	Up	0.0175844	cytoplasm	K17822			IPR005176; IPR009060;	Potentiating neddylation domain; UBA-like;
Zm00001d006153_P007	1-acylglycerol-3-phosphate O-acyltransferase	1.333	Up	0.0162198	mitochondria	K13699			IPR029058; IPR000073;	Alpha/Beta hydrolase fold; Alpha/beta hydrolase fold-1;
Zm00001d012819_P001	Protein SRG1	1.332	Up	0.0446	cytoplasm				IPR027443; IPR005123; IPR026992;	Isopenicillin N synthase-like; Oxoglutarate/iron-dependent dioxygenase; Non-haem dioxygenase N-terminal domain;
Zm00001d046942_P001	Fructose-1%2C6-bisphosphatase	1.332	Up	0.003598	chloroplast	K03841	FBP; fructose-1,6-bisphosphatase I [EC:3.1.3.11]	zma00030 Pentose phosphate pathway - Zea mays (maize); zma00010 Glycolysis / Gluconeogenesis - Zea mays (maize); zma01200 Carbon metabolism - Zea mays (maize); zma01110 Biosynthesis of secondary metabolites - Zea mays (maize); zma01100 Metabolic pathways - Zea mays (maize); zma00051 Fructose and mannose metabolism - Zea mays (maize); zma00710 Carbon fixation in photosynthetic organisms - Zea mays…	IPR033391;	Fructose-1-6-bisphosphatase class I, N-terminal;
Zm00001d023327_P004	AccQ84YF7_SORBI] GN=Truncated rp1-4 protein [source:UniProtKB/TrEMBL	1.331	Up	0.006143	chloroplast				IPR001251; IPR002182; IPR027417; IPR009457; IPR032675; IPR011074;	CRAL-TRIO lipid binding domain; NB-ARC; P-loop containing nucleoside triphosphate hydrolase; Domain of unknown function DUF1084; Leucine-rich repeat domain, L domain-like; CRAL/TRIO, N-terminal domain;
Zm00001d049449_P005	"cold regulated protein homolog1 leaf cDNA csu19, similar to barley cold-regulated protein GN= cld1"	1.331	Up	0.029495	nucleus	K12619	XRN2; 5'-3' exoribonuclease 2 [EC:3.1.13.-]	zma03008 Ribosome biogenesis in eukaryotes - Zea mays (maize); zma03018 RNA degradation - Zea mays (maize);	IPR001878; IPR004859;	Zinc finger, CCHC-type; Putative 5-3 exonuclease;
Zm00001d011813_P001	bundle sheath strands specific1 encodes a photosynthesis-related protein with a deduced amino acid sequence with high homology to tomato Asr1 in the C-terminal region GN= bss1	1.331	Up	0.0043601	mitochondria
Zm00001d034074_P025	starch phosphorylase1 amyloplast starch phosphorylase GN= pho1	1.331	Up	0.0112568	cytoplasm	K00688	PYG; glycogen phosphorylase [EC:2.4.1.1]	zma00500 Starch and sucrose metabolism - Zea mays (maize); zma01110 Biosynthesis of secondary metabolites - Zea mays (maize); zma01100 Metabolic pathways - Zea mays (maize);
Zm00001d010649_P001	Probable calcium-binding protein CML20	1.33	Up	0.036515	chloroplast	K02183	CALM; calmodulin	zma04626 Plant-pathogen interaction - Zea mays (maize); zma04070 Phosphatidylinositol signaling system - Zea mays (maize); zma04016 MAPK signaling pathway - plant - Zea mays (maize);	IPR002048; IPR011992;	EF-hand domain; EF-hand domain pair;
Zm00001d053919_P006	Histone deacetylase complex subunit SAP18	1.33	Up	0.0050036	chloroplast	K14324	SAP18; histone deacetylase complex subunit SAP18	zma03015 mRNA surveillance pathway - Zea mays (maize); zma03013 RNA transport - Zea mays (maize);
Zm00001d019450_P002	CO(2)-response secreted protease	1.329	Up	0.0179808	chloroplast				IPR003137; IPR034197; IPR000209; IPR010259;	PA domain; Cucumisin-like catalytic domain; Peptidase S8/S53 domain; Peptidase S8 propeptide/proteinase inhibitor I9;
Zm00001d054069_P001	Tetratricopeptide repeat (TPR)-like superfamily protein	1.327	Up	0.0084419	chloroplast				IPR011990; IPR013026;	Tetratricopeptide-like helical domain; Tetratricopeptide repeat-containing domain;
Zm00001d034758_P001	Acyl-CoA binding protein	1.327	Up	0.0098794	chloroplast				IPR000582; IPR015915; IPR014352;	Acyl-CoA-binding protein, ACBP; Kelch-type beta propeller; FERM/acyl-CoA-binding protein, 3-helical bundle;
Zm00001d033734_P003	Coatomer subunit alpha-1	1.327	Up	0.0046752	cytoplasm	K05236			IPR006692; IPR017986; IPR015943; IPR010714;	Coatomer, WD associated region; WD40-repeat-containing domain; WD40/YVTN repeat-like-containing domain; Coatomer, alpha subunit, C-terminal;
Zm00001d025305_P001	calnexin homolog2 GN= clx2	1.325	Up	0.0041759	plasma membrane	K08054	CANX; calnexin	zma04145 Phagosome - Zea mays (maize); zma04141 Protein processing in endoplasmic reticulum - Zea mays (maize);	IPR009033; IPR013320;	Calreticulin/calnexin, P domain; Concanavalin A-like lectin/glucanase domain;
Zm00001d054106_P011	protein disulfide isomerase3 GN= pdi3	1.324	Up	0.00153967	cytoskeleton	K09580	PDIA1; protein disulfide-isomerase A1 [EC:5.3.4.1]	zma04141 Protein processing in endoplasmic reticulum - Zea mays (maize);	IPR013766; IPR012336;	Thioredoxin domain; Thioredoxin-like fold;
Zm00001d017979_P002	Dynamin-2A	1.324	Up	0.0058217	chloroplast	K01528	DNM; dynamin GTPase [EC:3.6.5.5]	zma04144 Endocytosis - Zea mays (maize);	IPR030381; IPR003130; IPR001401; IPR020850; IPR027417; IPR001849; IPR011993; IPR000375;	Dynamin-type guanine nucleotide-binding (G) domain; Dynamin GTPase effector; Dynamin, GTPase domain; GTPase effector domain; P-loop containing nucleoside triphosphate hydrolase; Pleckstrin homology domain; PH domain-like; Dynamin central domain;
Zm00001d014993_P003	Luminal-binding protein 2	1.324	Up	0.00161584	endoplasmic reticulum	K09490	HSPA5; heat shock 70kDa protein 5	zma03060 Protein export - Zea mays (maize); zma04141 Protein processing in endoplasmic reticulum - Zea mays (maize);	IPR029048; IPR029047;	Heat shock protein 70kD, C-terminal domain; Heat shock protein 70kD, peptide-binding domain;
Zm00001d032162_P002	Temperature-induced lipocalin-1	1.324	Up	0.027461	cytoplasm	K03098			IPR000566; IPR012674; IPR011038;	Lipocalin/cytosolic fatty-acid binding domain; Calycin; Calycin-like;
Zm00001d024755_P009	PTI1-like tyrosine-protein kinase 3	1.323	Up	0.00100218	cytoplasm	K13436	PTI1; pto-interacting protein 1 [EC:2.7.11.1]	zma04626 Plant-pathogen interaction - Zea mays (maize);	IPR000719; IPR001245; IPR011009;	Protein kinase domain; Serine-threonine/tyrosine-protein kinase catalytic domain; Protein kinase-like domain;
Zm00001d033204_P001	methyl binding domain115 GN= mbd115	1.323	Up	0.000164035	nucleus				IPR016177; IPR001739;	DNA-binding domain; Methyl-CpG DNA binding;
Zm00001d004677_P002	Eukaryotic initiation factor 5C CG2922-PF%2C isoform F	1.323	Up	0.00197825	cytoplasm				IPR003307; IPR016024; IPR016021;	W2 domain; Armadillo-type fold; MIF4G-like domain;
Zm00001d036933_P001	Aldehyde dehydrogenase family 2 member C4	1.32	Up	0.046423	cytoplasm	K12355	REF1; coniferyl-aldehyde dehydrogenase [EC:1.2.1.68]	zma00940 Phenylpropanoid biosynthesis - Zea mays (maize);	IPR016161; IPR015590; IPR016162; IPR016163;	Aldehyde/histidinol dehydrogenase; Aldehyde dehydrogenase domain; Aldehyde dehydrogenase N-terminal domain; Aldehyde dehydrogenase, C-terminal;
Zm00001d048336_P004	Serine/threonine-protein phosphatase	1.32	Up	0.00178159	cytoplasm	K04382	PPP2C; serine/threonine-protein phosphatase 2A catalytic subunit [EC:3.1.3.16]	zma03015 mRNA surveillance pathway - Zea mays (maize); zma04136 Autophagy - other - Zea mays (maize);	IPR029052; IPR004843; IPR006186;	Metallo-dependent phosphatase-like; Calcineurin-like phosphoesterase domain, ApaH type; Serine/threonine-specific protein phosphatase/bis(5-nucleosyl)-tetraphosphatase;
Zm00001d052721_P001	Ubiquitin family protein	1.319	Up	0.0017371	nucleus
Zm00001d047726_P001	DnaJ protein ERDJ3A	1.317	Up	0.040836	vacuolar membrane				IPR001623; IPR012336;	DnaJ domain; Thioredoxin-like fold;
Zm00001d043845_P026	Glutamate synthase 1 [NADH] chloroplastic	1.316	Up	0.00057662	cytoplasm	K00264	GLT1; glutamate synthase (NADH) [EC:1.4.1.14]	zma01230 Biosynthesis of amino acids - Zea mays (maize); zma01110 Biosynthesis of secondary metabolites - Zea mays (maize); zma01100 Metabolic pathways - Zea mays (maize); zma00250 Alanine, aspartate and glutamate metabolism - Zea mays (maize); zma00910 Nitrogen metabolism - Zea mays (maize);	IPR013785; IPR002489; IPR029055; IPR006982; IPR009051; IPR002932; IPR028261; IPR017932; IPR023753;	Aldolase-type TIM barrel; Glutamate synthase, alpha subunit, C-terminal; Nucleophile aminohydrolases, N-terminal; Glutamate synthase, central-N; Alpha-helical ferredoxin; Glutamate synthase domain; Dihydroprymidine dehydrogenase domain II; Glutamine amidotransferase type 2 domain; FAD/NAD(P)-binding domain;
Zm00001d053963_P003	tRNA (guanine-N(7)-)-methyltransferase	1.316	Up	0.026385	nucleus	K03439			IPR029063;	S-adenosyl-L-methionine-dependent methyltransferase;
Zm00001d044303_P009	myosin1 GN= myo1	1.313	Up	0.0026642	cytoplasm	K10357			IPR002710; IPR027417; IPR001609; IPR027401;	Dilute domain; P-loop containing nucleoside triphosphate hydrolase; Myosin head, motor domain; Myosin-like IQ motif-containing domain;
Zm00001d046226_P018	multidrug resistance protein associated1 ATP-binding cassette (ABC) transporter GN= mrpa1	1.313	Up	0.034678	vacuolar membrane	K05665	ABCC1; ATP-binding cassette, subfamily C (CFTR/MRP), member 1 [EC:7.6.2.3]	zma02010 ABC transporters - Zea mays (maize);	IPR003439; IPR011527; IPR027417;	ABC transporter-like; ABC transporter type 1, transmembrane domain; P-loop containing nucleoside triphosphate hydrolase;
Zm00001d023795_P048	E3 ubiquitin-protein ligase UPL1	1.313	Up	0.030144	chloroplast	K10592	HUWE1; E3 ubiquitin-protein ligase HUWE1 [EC:2.3.2.26]	zma04120 Ubiquitin mediated proteolysis - Zea mays (maize);	IPR015940; IPR010314; IPR025527; IPR010309; IPR000569; IPR016024; IPR009060;	Ubiquitin-associated domain; E3 ubiquitin ligase, domain of unknown function DUF913; Domain of unknown function DUF4414; E3 ubiquitin ligase, domain of unknown function DUF908; HECT domain; Armadillo-type fold; UBA-like;
Zm00001d037291_P003	Microtubule-associated protein 70-1	1.312	Up	0.031039	cytoplasm
Zm00001d008491_P002	Fructose-bisphosphate aldolase	1.312	Up	0.046079	chloroplast	K01623	ALDO; fructose-bisphosphate aldolase, class I [EC:4.1.2.13]	zma00030 Pentose phosphate pathway - Zea mays (maize); zma00010 Glycolysis / Gluconeogenesis - Zea mays (maize); zma01230 Biosynthesis of amino acids - Zea mays (maize); zma01200 Carbon metabolism - Zea mays (maize); zma01110 Biosynthesis of secondary metabolites - Zea mays (maize); zma01100 Metabolic pathways - Zea mays (maize); zma00051 Fructose and mannose metabolism - Zea mays (maize); zma007…	IPR013785;	Aldolase-type TIM barrel;
Zm00001d033210_P002	Chaperone protein dnaJ 3	1.311	Up	0.0164172	nucleus	K09503	DNAJA2; DnaJ homolog subfamily A member 2	zma04141 Protein processing in endoplasmic reticulum - Zea mays (maize);	IPR008971; IPR002939; IPR001623; IPR001305;	HSP40/DnaJ peptide-binding; Chaperone DnaJ, C-terminal; DnaJ domain; Heat shock protein DnaJ, cysteine-rich domain;
Zm00001d008387_P002	ribosomal protein S5 endosperm cDNA 5C06A11 similar to ribosomal protein GN= rps5	1.309	Up	0.002896	cytoskeleton	K02989	RP-S5e; small subunit ribosomal protein S5e	zma03010 Ribosome - Zea mays (maize);	IPR023798;	Ribosomal protein S7 domain;
Zm00001d008656_P002	Transcription initiation factor TFIID subunit 15b	1.309	Up	0.0177245	cytoplasm	K13098			IPR000504; IPR012677; IPR001876;	RNA recognition motif domain; Nucleotide-binding alpha-beta plait domain; Zinc finger, RanBP2-type;
Zm00001d016031_P001	GDSL esterase/lipase	1.309	Up	0.0141447	mitochondria				IPR001087; IPR013830;	GDSL lipase/esterase; SGNH hydrolase-type esterase domain;
Zm00001d022302_P001	Peptidase C15 pyroglutamyl peptidase I-like	1.308	Up	0.0162025	cytoplasm	K01304
Zm00001d004785_P001	Protein TPLATE	1.308	Up	0.0045751	chloroplast
Zm00001d010919_P001	PTI1-like tyrosine-protein kinase 3	1.307	Up	0.044839	cytoplasm	K13436	PTI1; pto-interacting protein 1 [EC:2.7.11.1]	zma04626 Plant-pathogen interaction - Zea mays (maize);	IPR000719; IPR001245; IPR013320; IPR011009;	Protein kinase domain; Serine-threonine/tyrosine-protein kinase catalytic domain; Concanavalin A-like lectin/glucanase domain; Protein kinase-like domain;
Zm00001d022516_P001	Stress responsive protein	1.307	Up	0.028822	cytoplasm				IPR000772;	Ricin B, lectin domain;
Zm00001d028577_P001	DNA-binding protein	1.306	Up	0.0063775	nucleus				IPR005175;	PPC domain;
Zm00001d054066_P001	Glycosyltransferase family 61 protein	1.305	Up	0.0120991	chloroplast
Zm00001d038193_P005	Isopentenyl-diphosphate Delta-isomerase I chloroplastic	1.303	Up	0.0093369	chloroplast	K01823	idi; isopentenyl-diphosphate Delta-isomerase [EC:5.3.3.2]	zma00900 Terpenoid backbone biosynthesis - Zea mays (maize); zma01110 Biosynthesis of secondary metabolites - Zea mays (maize); zma01100 Metabolic pathways - Zea mays (maize);	IPR015797; IPR000086;	NUDIX hydrolase domain-like; NUDIX hydrolase domain;
Zm00001d047397_P001	transmembrane protein G1P-related 1	1.303	Up	0.042519	chloroplast
Zm00001d033896_P001	"lemon white1 white seedling, pale yellow endosperm GN= lw1"	1.302	Up	0.040458	chloroplast	K03527	ispH; 4-hydroxy-3-methylbut-2-en-1-yl diphosphate reductase [EC:1.17.7.4]	zma00900 Terpenoid backbone biosynthesis - Zea mays (maize); zma01110 Biosynthesis of secondary metabolites - Zea mays (maize); zma01100 Metabolic pathways - Zea mays (maize);
Zm00001d036642_P002	Zinc-binding protein	1.301	Up	0.0171963	mitochondria	K02503			IPR011146;	HIT-like domain;
Zm00001d026359_P002	uncharacterized protein	1.301	Up	0.0002813	nucleus				IPR026854;	Vacuolar protein sorting-associated protein 13, N-terminal domain;
Zm00001d049746_P015	RanBP2-type zinc finger protein	1.301	Up	0.0137005	chloroplast				IPR001876;	Zinc finger, RanBP2-type;
Zm00001d018567_P001	Protein ELC-like	1.301	Up	0.00032432	chloroplast	K12183	TSG101; ESCRT-I complex subunit TSG101	zma04144 Endocytosis - Zea mays (maize);	IPR016135; IPR008883; IPR017916;	Ubiquitin-conjugating enzyme/RWD-like; Ubiquitin E2 variant, N-terminal; Steadiness box (SB) domain;
Zm00001d016722_P004	Cytochrome b-c1 complex subunit 6	0.769	Down	0.0022245	chloroplast	K00416	QCR6; ubiquinol-cytochrome c reductase subunit 6	zma00190 Oxidative phosphorylation - Zea mays (maize); zma01100 Metabolic pathways - Zea mays (maize);	IPR023184;	Ubiquinol-cytochrome C reductase hinge domain;
Zm00001d006185_P001	6-phosphogluconolactonase	0.769	Down	0.00055572	chloroplast	K01057	PGLS; 6-phosphogluconolactonase [EC:3.1.1.31]	zma00030 Pentose phosphate pathway - Zea mays (maize); zma01200 Carbon metabolism - Zea mays (maize); zma01110 Biosynthesis of secondary metabolites - Zea mays (maize); zma01100 Metabolic pathways - Zea mays (maize);	IPR006148; IPR005900;	Glucosamine/galactosamine-6-phosphate isomerase; 6-phosphogluconolactonase, DevB-type;
Zm00001d035463_P001	NAD(P)-binding Rossmann-fold superfamily protein	0.769	Down	0.0035244	cytoplasm
Zm00001d043815_P005	Methionyl-tRNA formyltransferase	0.769	Down	0.045037	chloroplast	K00604	MTFMT; methionyl-tRNA formyltransferase [EC:2.1.2.9]	zma00970 Aminoacyl-tRNA biosynthesis - Zea mays (maize); zma00670 One carbon pool by folate - Zea mays (maize);	IPR005793; IPR011034; IPR002376;	Formyl transferase, C-terminal; Formyl transferase, C-terminal-like; Formyl transferase, N-terminal;
Zm00001d024159_P001	Bifunctional dethiobiotin synthetase/78-diamino-pelargonic acid aminotransferase mitochondrial	0.768	Down	0.0053171	mitochondria	K19562	BIO3-BIO1; bifunctional dethiobiotin synthetase / adenosylmethionine---8-amino-7-oxononanoate aminotransferase [EC:6.3.3.3 2.6.1.62]	zma00780 Biotin metabolism - Zea mays (maize); zma01100 Metabolic pathways - Zea mays (maize);	IPR015424; IPR027417; IPR015421; IPR015422;	Pyridoxal phosphate-dependent transferase; P-loop containing nucleoside triphosphate hydrolase; Pyridoxal phosphate-dependent transferase, major region, subdomain 1; Pyridoxal phosphate-dependent transferase, major region, subdomain 2;
Zm00001d004123_P002	Lactoylglutathione lyase	0.768	Down	0.0068381	cytoplasm	K01759	GLO1; lactoylglutathione lyase [EC:4.4.1.5]	zma00620 Pyruvate metabolism - Zea mays (maize);	IPR029068; IPR004360;	Glyoxalase/Bleomycin resistance protein/Dihydroxybiphenyl dioxygenase; Glyoxalase/fosfomycin resistance/dioxygenase domain;
Zm00001d014436_P008	26S proteasome non-ATPase regulatory subunit 13 homolog A	0.768	Down	0.00137686	cytoplasm	K03039	PSMD13; 26S proteasome regulatory subunit N9	zma03050 Proteasome - Zea mays (maize);	IPR011991; IPR000717;	Winged helix-turn-helix DNA-binding domain; Proteasome component (PCI) domain;
Zm00001d029329_P010	Polypyrimidine tract-binding protein homolog 1	0.768	Down	0.031661	nucleus	K14948			IPR000504; IPR012677;	RNA recognition motif domain; Nucleotide-binding alpha-beta plait domain;
Zm00001d002721_P001	extensin-like protein	0.768	Down	0.00157584	extracellular				IPR016140; IPR027923;	Bifunctional inhibitor/plant lipid transfer protein/seed storage helical domain; Hydrophobic seed protein;
Zm00001d034479_P001	histone one (H1) (was H1a) GN= hon110	0.768	Down	0.033943	nucleus	K11275			IPR011991; IPR005818;	Winged helix-turn-helix DNA-binding domain; Linker histone H1/H5, domain H15;
Zm00001d031749_P003	Pyridoxal phosphate (PLP)-dependent transferases superfamily protein	0.767	Down	0.00031769	cytoplasm	K01580	E4.1.1.15; glutamate decarboxylase [EC:4.1.1.15]	zma00650 Butanoate metabolism - Zea mays (maize); zma00410 beta-Alanine metabolism - Zea mays (maize); zma01110 Biosynthesis of secondary metabolites - Zea mays (maize); zma01100 Metabolic pathways - Zea mays (maize); zma00430 Taurine and hypotaurine metabolism - Zea mays (maize); zma00250 Alanine, aspartate and glutamate metabolism - Zea mays (maize);	IPR015424; IPR015421;	Pyridoxal phosphate-dependent transferase; Pyridoxal phosphate-dependent transferase, major region, subdomain 1;
Zm00001d012846_P003	Elongation factor Tu mitochondrial	0.767	Down	0.0054796	chloroplast	K02358			IPR009001; IPR027417; IPR000795; IPR033720; IPR004160; IPR005225; IPR004161; IPR009000;	Translation elongation factor EF1A/initiation factor IF2gamma, C-terminal; P-loop containing nucleoside triphosphate hydrolase; Transcription factor, GTP-binding domain; Elongation factor Tu, domain 2; Translation elongation factor EFTu/EF1A, C-terminal; Small GTP-binding protein domain; Translation elongation factor EFTu-like, domain 2; Translation protein, beta-barrel domain;
Zm00001d014732_P003	Peptidyl-prolyl cis-trans isomerase%2C microsomal	0.765	Down	0.0131201	mitochondria	K01802			IPR002130; IPR029000;	Cyclophilin-type peptidyl-prolyl cis-trans isomerase domain; Cyclophilin-like domain;
Zm00001d003879_P002	Glycine--tRNA ligase mitochondrial 1	0.765	Down	0.00061807	cytoplasm	K01880	GARS; glycyl-tRNA synthetase [EC:6.1.1.14]	zma00970 Aminoacyl-tRNA biosynthesis - Zea mays (maize);	IPR002314; IPR004154; IPR006195;	Aminoacyl-tRNA synthetase, class II (G/ P/ S/T); Anticodon-binding; Aminoacyl-tRNA synthetase, class II;
Zm00001d008622_P002	Synaptic glycoprotein SC2	0.762	Down	0.0033783	chloroplast	K10258	TER; very-long-chain enoyl-CoA reductase [EC:1.3.1.93]	zma01040 Biosynthesis of unsaturated fatty acids - Zea mays (maize); zma00062 Fatty acid elongation - Zea mays (maize); zma01212 Fatty acid metabolism - Zea mays (maize); zma01110 Biosynthesis of secondary metabolites - Zea mays (maize); zma01100 Metabolic pathways - Zea mays (maize);	IPR001104;	3-oxo-5-alpha-steroid 4-dehydrogenase, C-terminal;
Zm00001d038448_P003	uncharacterized protein	0.762	Down	0.00038464	chloroplast	K20359
Zm00001d016342_P001	uncharacterized protein	0.762	Down	0.00188156	nucleus
Zm00001d054008_P002	Mevalonate kinase	0.761	Down	0.0083207	cytoplasm	K00869	E2.7.1.36; mevalonate kinase [EC:2.7.1.36]	zma00900 Terpenoid backbone biosynthesis - Zea mays (maize); zma01110 Biosynthesis of secondary metabolites - Zea mays (maize); zma01100 Metabolic pathways - Zea mays (maize); zma04146 Peroxisome - Zea mays (maize);	IPR020568; IPR006204; IPR014721; IPR013750;	Ribosomal protein S5 domain 2-type fold; GHMP kinase N-terminal domain; Ribosomal protein S5 domain 2-type fold, subgroup; GHMP kinase, C-terminal domain;
Zm00001d028775_P001	Thioredoxin superfamily protein	0.761	Down	0.0019363	extracellular	K08059
Zm00001d014876_P003	Disease resistance RPP13-like protein 4	0.761	Down	9.9618e-05	cytoplasm	K00695	E2.4.1.13; sucrose synthase [EC:2.4.1.13]	zma00500 Starch and sucrose metabolism - Zea mays (maize); zma01100 Metabolic pathways - Zea mays (maize);	IPR000368; IPR001296;	Sucrose synthase; Glycosyl transferase, family 1;
Zm00001d020686_P001	1-aminocyclopropane-1-carboxylate oxidase2 GN= acco2	0.76	Down	0.0049615	cytoplasm	K05933	E1.14.17.4; aminocyclopropanecarboxylate oxidase [EC:1.14.17.4]	zma01110 Biosynthesis of secondary metabolites - Zea mays (maize); zma01100 Metabolic pathways - Zea mays (maize); zma00270 Cysteine and methionine metabolism - Zea mays (maize);	IPR005123; IPR027443; IPR026992;	Oxoglutarate/iron-dependent dioxygenase; Isopenicillin N synthase-like; Non-haem dioxygenase N-terminal domain;
Zm00001d009431_P003	farnesyl pyrophosphate synthase1 endosperm cDNA sequence GN= fps1	0.76	Down	0.0098198	cytoplasm	K00787	FDPS; farnesyl diphosphate synthase [EC:2.5.1.1 2.5.1.10]	zma00900 Terpenoid backbone biosynthesis - Zea mays (maize); zma01110 Biosynthesis of secondary metabolites - Zea mays (maize); zma01100 Metabolic pathways - Zea mays (maize);	IPR008949;	Isoprenoid synthase domain;
Zm00001d014779_P001	Putative membrane lipoprotein	0.759	Down	0.013815	chloroplast
Zm00001d003839_P003	uncharacterized protein	0.759	Down	0.003865	chloroplast				IPR029058;	Alpha/Beta hydrolase fold;
Zm00001d021626_P002	Reactive Intermediate Deaminase A chloroplastic	0.759	Down	0.0029588	chloroplast	K09022			IPR013813;	Endoribonuclease L-PSP/chorismate mutase-like;
Zm00001d021231_P005	RHOMBOID-like protein 3	0.759	Down	0.0175213	plasma membrane				IPR022764;	Peptidase S54, rhomboid domain;
Zm00001d050666_P001	2-Cys peroxiredoxin BAS1 chloroplastic	0.759	Down	0.030044	chloroplast	K03386			IPR019479; IPR000866; IPR013766; IPR012336;	Peroxiredoxin, C-terminal; Alkyl hydroperoxide reductase subunit C/ Thiol specific antioxidant; Thioredoxin domain; Thioredoxin-like fold;
Zm00001d007113_P006	Xylose isomerase	0.759	Down	1.86931e-05	cytoplasm	K01805	xylA; xylose isomerase [EC:5.3.1.5]	zma01100 Metabolic pathways - Zea mays (maize); zma00040 Pentose and glucuronate interconversions - Zea mays (maize); zma00051 Fructose and mannose metabolism - Zea mays (maize);	IPR013022;	Xylose isomerase-like, TIM barrel domain;
Zm00001d038003_P001	uncharacterized protein	0.757	Down	0.0138959	chloroplast
Zm00001d008408_P001	uncharacterized protein	0.756	Down	0.00031523	nucleus
Zm00001d017379_P001	Thioredoxin M1 chloroplastic	0.756	Down	0.00060198	chloroplast	K03671			IPR012336; IPR013766;	Thioredoxin-like fold; Thioredoxin domain;
Zm00001d038351_P003	Adenine nucleotide alpha hydrolases-like superfamily protein	0.756	Down	0.0160236	cytoplasm				IPR014729; IPR006016;	Rossmann-like alpha/beta/alpha sandwich fold; UspA;
Zm00001d005546_P002	"ADP glucose pyrophosphorylase small subunit embryo 1 embryo cDNA that hybridizes to endosperm transcripts, distinct from sh2 and bt2 but most similar to the bt2 gene product GN= agp1"	0.756	Down	5.7968e-05	chloroplast	K00975	glgC; glucose-1-phosphate adenylyltransferase [EC:2.7.7.27]	zma00500 Starch and sucrose metabolism - Zea mays (maize); zma00520 Amino sugar and nucleotide sugar metabolism - Zea mays (maize); zma01110 Biosynthesis of secondary metabolites - Zea mays (maize); zma01100 Metabolic pathways - Zea mays (maize);	IPR011004; IPR005835; IPR029044;	Trimeric LpxA-like; Nucleotidyl transferase domain; Nucleotide-diphospho-sugar transferases;
Zm00001d027996_P002	Alcohol dehydrogenase-like 2	0.756	Down	0.0185842	cytoplasm	K00121	frmA; S-(hydroxymethyl)glutathione dehydrogenase / alcohol dehydrogenase [EC:1.1.1.284 1.1.1.1]	zma00010 Glycolysis / Gluconeogenesis - Zea mays (maize); zma01200 Carbon metabolism - Zea mays (maize); zma00071 Fatty acid degradation - Zea mays (maize); zma01110 Biosynthesis of secondary metabolites - Zea mays (maize); zma01100 Metabolic pathways - Zea mays (maize); zma00350 Tyrosine metabolism - Zea mays (maize);	IPR011032; IPR016040; IPR013154; IPR013149;	GroES-like; NAD(P)-binding domain; Alcohol dehydrogenase, N-terminal; Alcohol dehydrogenase, C-terminal;
Zm00001d034345_P002	Ferredoxin--NADP reductase root isozyme 1 chloroplastic	0.755	Down	4.2953e-05	chloroplast	K02641	petH; ferredoxin--NADP+ reductase [EC:1.18.1.2]	zma01100 Metabolic pathways - Zea mays (maize); zma00195 Photosynthesis - Zea mays (maize);	IPR017927; IPR001433; IPR017938; IPR001709;	Ferredoxin reductase-type FAD-binding domain; Oxidoreductase FAD/NAD(P)-binding; Riboflavin synthase-like beta-barrel; Flavoprotein pyridine nucleotide cytochrome reductase;
Zm00001d021021_P002	Peptidyl-prolyl cis-trans isomerase	0.753	Down	0.035039	extracellular	K09569			IPR001179;	FKBP-type peptidyl-prolyl cis-trans isomerase domain;
Zm00001d048199_P001	uncharacterized protein	0.753	Down	0.024301	nucleus				IPR005202;	Transcription factor GRAS;
Zm00001d020578_P001	AAA-ATPase	0.751	Down	0.0162625	chloroplast				IPR003959; IPR003593; IPR025753; IPR027417;	ATPase, AAA-type, core; AAA+ ATPase domain; AAA-type ATPase, N-terminal domain; P-loop containing nucleoside triphosphate hydrolase;
Zm00001d003423_P001	Arsenical pump-driving ATPase	0.751	Down	0.039644	chloroplast				IPR027417; IPR025723;	P-loop containing nucleoside triphosphate hydrolase; Anion-transporting ATPase-like domain;
Zm00001d046697_P001	Dihydroflavonol-4-reductase	0.75	Down	0.00046362	chloroplast				IPR001509; IPR016040;	NAD-dependent epimerase/dehydratase; NAD(P)-binding domain;
Zm00001d039656_P003	NADH-cytochrome b5 reductase-like protein	0.75	Down	0.0104245	chloroplast	K00326	E1.6.2.2; cytochrome-b5 reductase [EC:1.6.2.2]	zma00520 Amino sugar and nucleotide sugar metabolism - Zea mays (maize);	IPR001433; IPR017927; IPR008333; IPR017938; IPR001709;	Oxidoreductase FAD/NAD(P)-binding; Ferredoxin reductase-type FAD-binding domain; Oxidoreductase, FAD-binding domain; Riboflavin synthase-like beta-barrel; Flavoprotein pyridine nucleotide cytochrome reductase;
Zm00001d018734_P001	Pathogenesis-related protein 1	0.75	Down	0.036685	chloroplast	K13449	PR1; pathogenesis-related protein 1	zma04626 Plant-pathogen interaction - Zea mays (maize); zma04016 MAPK signaling pathway - plant - Zea mays (maize); zma04075 Plant hormone signal transduction - Zea mays (maize);	IPR034111; IPR014044;	Pathogenesis-related protein 1-like, SCP domain; CAP domain;
Zm00001d001980_P002	Protein kinase-like	0.75	Down	0.048157	chloroplast	K08869			IPR004147; IPR011009;	UbiB domain; Protein kinase-like domain;
Zm00001d038541_P003	set domain gene111 GN= sdg111	0.749	Down	0.0069812	nucleus	K11420	EHMT; euchromatic histone-lysine N-methyltransferase [EC:2.1.1.43]	zma00310 Lysine degradation - Zea mays (maize);	IPR015947; IPR001214; IPR003105; IPR003616; IPR007728;	PUA-like domain; SET domain; SRA-YDG; Post-SET domain; Pre-SET domain;
Zm00001d015134_P001	Probable ATP synthase 24 kDa subunit mitochondrial	0.749	Down	0.00155643	mitochondria
Zm00001d014786_P003	Has 35333 Blast hits to 34131 proteins in 2444 species Archae - 798 GN=CONTAINS InterPro DOMAIN/s: Brain/reproductive organ-expressed protein (InterPro:IPR010358)	0.748	Down	0.0160834	chloroplast	K12173	BRE; BRCA1-A complex subunit BRE	zma03440 Homologous recombination - Zea mays (maize);
Zm00001d003434_P001	Galactose mutarotase-like superfamily protein	0.748	Down	0.021597	extracellular	K01785	galM; aldose 1-epimerase [EC:5.1.3.3]	zma00052 Galactose metabolism - Zea mays (maize); zma00010 Glycolysis / Gluconeogenesis - Zea mays (maize); zma01110 Biosynthesis of secondary metabolites - Zea mays (maize); zma01100 Metabolic pathways - Zea mays (maize);	IPR011013; IPR014718;	Galactose mutarotase-like domain; Glycoside hydrolase-type carbohydrate-binding;
Zm00001d047788_P007	Histone H2B	0.748	Down	0.045623	cytoplasm	K11252			IPR009072; IPR007125;	Histone-fold; Histone H2A/H2B/H3;
Zm00001d015329_P005	FAD/NAD(P)-binding oxidoreductase family protein	0.747	Down	0.0076632	mitochondria				IPR016040; IPR023753;	NAD(P)-binding domain; FAD/NAD(P)-binding domain;
Zm00001d005343_P006	Nucleoside N-ribohydrolase 3%3B Pyrimidine-specific ribonucleoside hydrolase rihB	0.747	Down	0.00036061	cytoplasm	K01240	URH1; uridine nucleosidase [EC:3.2.2.3]	zma00240 Pyrimidine metabolism - Zea mays (maize); zma00760 Nicotinate and nicotinamide metabolism - Zea mays (maize);	IPR001910;	Inosine/uridine-preferring nucleoside hydrolase domain;
Zm00001d007034_P006	Synaptotagmin-5	0.747	Down	0.00141831	cytoplasm				IPR000008; IPR031468;	C2 domain; Synaptotagmin-like mitochondrial-lipid-binding domain;
Zm00001d037859_P002	Superoxide dismutase [Mn] 3.1%2C mitochondrial	0.747	Down	0.023641	mitochondria	K04564	SOD2; superoxide dismutase, Fe-Mn family [EC:1.15.1.1]	zma04146 Peroxisome - Zea mays (maize);	IPR019831; IPR019832;	Manganese/iron superoxide dismutase, N-terminal; Manganese/iron superoxide dismutase, C-terminal;
Zm00001d042634_P001	Extradiol ring-cleavage dioxygenase	0.746	Down	0.0107225	mitochondria	K15777	DOPA; 4,5-DOPA dioxygenase extradiol [EC:1.13.11.-]	zma00965 Betalain biosynthesis - Zea mays (maize);	IPR004183;	Extradiol ring-cleavage dioxygenase, class III enzyme, subunit B;
Zm00001d015509_P002	chorismate mutase2 enzyme activity from protein raised in E coli GN= cmu2	0.746	Down	0.00081803	cytoplasm	K01850	E5.4.99.5; chorismate mutase [EC:5.4.99.5]	zma01230 Biosynthesis of amino acids - Zea mays (maize); zma01110 Biosynthesis of secondary metabolites - Zea mays (maize); zma01100 Metabolic pathways - Zea mays (maize); zma00400 Phenylalanine, tyrosine and tryptophan biosynthesis - Zea mays (maize);	IPR020822;	Chorismate mutase, type II;
Zm00001d003751_P001	NDR1/HIN1-like 1	0.745	Down	0.0073836	extracellular				IPR004864;	Late embryogenesis abundant protein, LEA-14;
Zm00001d042842_P003	starch phoshorylase2 cytosolic starch phosphorylase inferred from data in Yu et al 2001 (MS 2015) GN= pho2	0.745	Down	0.0103157	cytoplasm	K00688	PYG; glycogen phosphorylase [EC:2.4.1.1]	zma00500 Starch and sucrose metabolism - Zea mays (maize); zma01110 Biosynthesis of secondary metabolites - Zea mays (maize); zma01100 Metabolic pathways - Zea mays (maize);	IPR002068; IPR008978;	Alpha crystallin/Hsp20 domain; HSP20-like chaperone;
Zm00001d040463_P001	Magnesium-protoporphyrin IX monomethyl ester [oxidative] cyclase chloroplastic	0.745	Down	0.020597	chloroplast	K04035	E1.14.13.81; magnesium-protoporphyrin IX monomethyl ester (oxidative) cyclase [EC:1.14.13.81]	zma00860 Porphyrin and chlorophyll metabolism - Zea mays (maize); zma01110 Biosynthesis of secondary metabolites - Zea mays (maize); zma01100 Metabolic pathways - Zea mays (maize);	IPR009078; IPR003251;	Ferritin-like superfamily; Rubrerythrin;
Zm00001d014954_P006	"translationally controlled tumor1 vegetative meristem cDNA 7C02C06 similar to protein conserved in yeast, plants and mammals GN= tct1"	0.744	Down	0.00031635	nucleus				IPR011323; IPR011057;	Mss4/translationally controlled tumour-associated TCTP; Mss4-like;
Zm00001d047253_P016	"sucrose synthase1 (was sus2, css1) sucrose synthase-1 (SUS1) of embryo and other tissues, compare sh1 GN= sus1"	0.744	Down	1.55852e-05	cytoplasm	K00695	E2.4.1.13; sucrose synthase [EC:2.4.1.13]	zma00500 Starch and sucrose metabolism - Zea mays (maize); zma01100 Metabolic pathways - Zea mays (maize);	IPR000368; IPR001296;	Sucrose synthase; Glycosyl transferase, family 1;
Zm00001d014617_P001	Xyloglucan endotransglucosylase/hydrolase protein 14	0.744	Down	0.0178956	vacuolar membrane	K08235			IPR010713; IPR013320; IPR000757;	Xyloglucan endo-transglycosylase, C-terminal; Concanavalin A-like lectin/glucanase domain; Glycoside hydrolase family 16;
Zm00001d004460_P011	AAR2 protein family	0.742	Down	0.0036156	nucleus	K13205			IPR033648;	AAR2, C-terminal;
Zm00001d004843_P003	abscisic acid stress ripening2 GN= aasr2	0.742	Down	0.0187357	mitochondria
Zm00001d053627_P002	Peptidase C13 family	0.742	Down	0.0173561	chloroplast	K05290	PIGK; phosphatidylinositol glycan, class K [EC:2.6.-.-]	zma01100 Metabolic pathways - Zea mays (maize); zma00563 Glycosylphosphatidylinositol (GPI)-anchor biosynthesis - Zea mays (maize);
Zm00001d038718_P001	hemoglobin2 suppression of expression is associated with programmed cell death (Huang et al 2014) GN=hb2	0.742	Down	0.026896	mitochondria	K21894			IPR009050; IPR000971; IPR012292;	Globin-like; Globin; Globin/Protoglobin;
Zm00001d049192_P002	chaperone protein dnaJ-related	0.742	Down	0.0041586	nucleus
Zm00001d049088_P001	ATP-dependent (S)-NAD(P)H-hydrate dehydratase	0.74	Down	0.00140454	chloroplast	K17757			IPR029056;	Ribokinase-like;
Zm00001d024966_P001	Multisynthetase complex auxiliary component p43	0.74	Down	0.0188239	chloroplast				IPR012340; IPR002547;	Nucleic acid-binding, OB-fold; tRNA-binding domain;
Zm00001d044845_P010	binding	0.739	Down	0.0197772	plasma membrane				IPR011989; IPR016024; IPR000008;	Armadillo-like helical; Armadillo-type fold; C2 domain;
Zm00001d048163_P001	Acyl carrier protein	0.738	Down	0.0172979	mitochondria	K03955	NDUFAB1; NADH dehydrogenase (ubiquinone) 1 alpha/beta subcomplex 1	zma00190 Oxidative phosphorylation - Zea mays (maize); zma01100 Metabolic pathways - Zea mays (maize);	IPR020806; IPR009081;	Polyketide synthase, phosphopantetheine-binding domain; Phosphopantetheine binding ACP domain;
Zm00001d052536_P002	uncharacterized protein	0.738	Down	4.4477e-05	mitochondria
Zm00001d012702_P008	Phosphoenolpyruvate carboxylase 3	0.738	Down	0.00059675	cytoplasm	K01595	ppc; phosphoenolpyruvate carboxylase [EC:4.1.1.31]	zma01200 Carbon metabolism - Zea mays (maize); zma01100 Metabolic pathways - Zea mays (maize); zma00710 Carbon fixation in photosynthetic organisms - Zea mays (maize); zma00620 Pyruvate metabolism - Zea mays (maize);	IPR015813;	Pyruvate/Phosphoenolpyruvate kinase-like domain;
Zm00001d053177_P004	Actin-7	0.738	Down	0.0131645	cytoskeleton	K05692
Zm00001d046971_P001	Filamentation temperature-sensitive H 2A isoform 1%3B Filamentation temperature-sensitive H 2A isoform 2%3B Filamentation temperature-sensitive H 2A isoform 3	0.738	Down	0.036245	chloroplast	K03798			IPR000642;	Peptidase M41;
Zm00001d035559_P001	Mannose-specific jacalin-related lectin GN=Expressed protein	0.737	Down	0.00078217	chloroplast				IPR001229; IPR033734;	Jacalin-like lectin domain; Jacalin-like lectin domain, plant;
Zm00001d034856_P006	"elongation factor TU mitochondrial1 genomic sequence, low copy numberl SSR umc2100 GN= tufm1"	0.737	Down	0.0145186	mitochondria	K02358			IPR027417; IPR009001; IPR000795; IPR033720; IPR005225; IPR004160; IPR004161; IPR009000;	P-loop containing nucleoside triphosphate hydrolase; Translation elongation factor EF1A/initiation factor IF2gamma, C-terminal; Transcription factor, GTP-binding domain; Elongation factor Tu, domain 2; Small GTP-binding protein domain; Translation elongation factor EFTu/EF1A, C-terminal; Translation elongation factor EFTu-like, domain 2; Translation protein, beta-barrel domain;
Zm00001d047697_P002	40S ribosomal protein S28	0.737	Down	0.0027435	cytoplasm	K02979	RP-S28e; small subunit ribosomal protein S28e	zma03010 Ribosome - Zea mays (maize);	IPR012340;	Nucleic acid-binding, OB-fold;
Zm00001d012929_P001	Receptor protein kinase TMK1	0.736	Down	0.0177758	nucleus				IPR000719; IPR013320; IPR011009;	Protein kinase domain; Concanavalin A-like lectin/glucanase domain; Protein kinase-like domain;
Zm00001d044866_P001	Serine/threonine-protein phosphatase 2A activator 2	0.736	Down	0.02066	chloroplast	K17605
Zm00001d026514_P002	Inositol-pentakisphosphate 2-kinase	0.735	Down	0.00074038	nucleus	K10572	IPPK; inositol-pentakisphosphate 2-kinase [EC:2.7.1.158]	zma04070 Phosphatidylinositol signaling system - Zea mays (maize); zma01100 Metabolic pathways - Zea mays (maize); zma00562 Inositol phosphate metabolism - Zea mays (maize);
Zm00001d013428_P004	phosphoglucomutase2 electrophoretic mobility GN= pgm2	0.732	Down	0.00146269	cytoplasm	K01835	pgm; phosphoglucomutase [EC:5.4.2.2]	zma00052 Galactose metabolism - Zea mays (maize); zma00010 Glycolysis / Gluconeogenesis - Zea mays (maize); zma00500 Starch and sucrose metabolism - Zea mays (maize); zma00520 Amino sugar and nucleotide sugar metabolism - Zea mays (maize); zma01110 Biosynthesis of secondary metabolites - Zea mays (maize); zma00230 Purine metabolism - Zea mays (maize); zma00030 Pentose phosphate pathway - Zea mays…	IPR005843; IPR005846; IPR005845; IPR016055; IPR005844;	Alpha-D-phosphohexomutase, C-terminal; Alpha-D-phosphohexomutase, alpha/beta/alpha domain III; Alpha-D-phosphohexomutase, alpha/beta/alpha domain II; Alpha-D-phosphohexomutase, alpha/beta/alpha I/II/III; Alpha-D-phosphohexomutase, alpha/beta/alpha domain I;
Zm00001d039946_P001	glycosyl hydrolase family 10 protein / carbohydrate-binding domain-containing protein	0.73	Down	0.00192063	cytoplasm				IPR001000; IPR017853; IPR013781;	Glycoside hydrolase family 10 domain; Glycoside hydrolase superfamily; Glycoside hydrolase, catalytic domain;
Zm00001d046322_P001	Putative FAD-binding Berberine family protein	0.728	Down	0.00109952	chloroplast				IPR016166; IPR016169; IPR012951; IPR016167; IPR006094;	FAD-binding, type 2; CO dehydrogenase flavoprotein-like, FAD-binding, subdomain 2; Berberine/berberine-like; FAD-binding, type 2, subdomain 1; FAD linked oxidase, N-terminal;
Zm00001d032442_P008	Cytochrome b5 isoform E	0.728	Down	2.9477e-06	cytoplasm				IPR001199;	Cytochrome b5-like heme/steroid binding domain;
Zm00001d009127_P001	ATP-citrate synthase beta chain protein 2	0.728	Down	0.00022352	chloroplast	K01648	ACLY; ATP citrate (pro-S)-lyase [EC:2.3.3.8]	zma01110 Biosynthesis of secondary metabolites - Zea mays (maize); zma01100 Metabolic pathways - Zea mays (maize); zma00020 Citrate cycle (TCA cycle) - Zea mays (maize);	IPR016142; IPR005811; IPR016040; IPR016143; IPR016102;	Citrate synthase-like, large alpha subdomain; ATP-citrate lyase/succinyl-CoA ligase; NAD(P)-binding domain; Citrate synthase-like, small alpha subdomain; Succinyl-CoA synthetase-like;
Zm00001d028282_P001	Cytochrome P450 CYP74A19	0.728	Down	0.00066008	chloroplast	K01723	AOS; hydroperoxide dehydratase [EC:4.2.1.92]	zma00592 alpha-Linolenic acid metabolism - Zea mays (maize); zma01110 Biosynthesis of secondary metabolites - Zea mays (maize); zma01100 Metabolic pathways - Zea mays (maize);
Zm00001d020808_P002	Peroxidase 17	0.728	Down	0.00130307	chloroplast	K00430	E1.11.1.7; peroxidase [EC:1.11.1.7]	zma00940 Phenylpropanoid biosynthesis - Zea mays (maize); zma01110 Biosynthesis of secondary metabolites - Zea mays (maize); zma01100 Metabolic pathways - Zea mays (maize);	IPR033905; IPR002016;	Secretory peroxidase; Haem peroxidase, plant/fungal/bacterial;
Zm00001d042725_P002	Sm-like protein LSM3B	0.728	Down	0.0083775	cytoplasm	K12622	LSM3; U6 snRNA-associated Sm-like protein LSm3	zma03018 RNA degradation - Zea mays (maize); zma03040 Spliceosome - Zea mays (maize);	IPR034105; IPR001163; IPR010920;	Sm-like protein Lsm3; LSM domain, eukaryotic/archaea-type; LSM domain;
Zm00001d021050_P004	Ribulose-phosphate 3-epimerase	0.727	Down	0.034177	cytoplasm	K01783	rpe; ribulose-phosphate 3-epimerase [EC:5.1.3.1]	zma00030 Pentose phosphate pathway - Zea mays (maize); zma01230 Biosynthesis of amino acids - Zea mays (maize); zma01200 Carbon metabolism - Zea mays (maize); zma01110 Biosynthesis of secondary metabolites - Zea mays (maize); zma01100 Metabolic pathways - Zea mays (maize); zma00040 Pentose and glucuronate interconversions - Zea mays (maize); zma00710 Carbon fixation in photosynthetic organisms - …	IPR013785; IPR011060;	Aldolase-type TIM barrel; Ribulose-phosphate binding barrel;
Zm00001d050384_P002	uncharacterized protein	0.727	Down	0.0183812	cytoplasm				IPR019721;	NADH-ubiquinone oxidoreductase, 21kDa subunit, N-terminal;
Zm00001d001879_P026	Auxin response factor 3	0.727	Down	0.022538	nucleus				IPR003340; IPR010525; IPR015300;	B3 DNA binding domain; Auxin response factor; DNA-binding pseudobarrel domain;
Zm00001d024408_P006	Galactose mutarotase-like superfamily protein	0.726	Down	0.0132406	chloroplast	K01792	E5.1.3.15; glucose-6-phosphate 1-epimerase [EC:5.1.3.15]	zma00010 Glycolysis / Gluconeogenesis - Zea mays (maize); zma01110 Biosynthesis of secondary metabolites - Zea mays (maize); zma01100 Metabolic pathways - Zea mays (maize);	IPR011013; IPR014718;	Galactose mutarotase-like domain; Glycoside hydrolase-type carbohydrate-binding;
Zm00001d019304_P001	uncharacterized protein	0.725	Down	0.0020446	chloroplast				IPR004864;	Late embryogenesis abundant protein, LEA-14;
Zm00001d004463_P010	Sterol 3-beta-glucosyltransferase UGT80A2	0.725	Down	0.02518	cytoplasm	K05841			IPR004276;	Glycosyltransferase family 28, N-terminal domain;
Zm00001d015406_P001	Succinate-semialdehyde dehydrogenase mitochondrial	0.725	Down	0.00133707	chloroplast	K17761	SSADH; succinate-semialdehyde dehydrogenase, mitochondrial [EC:1.2.1.24]	zma00650 Butanoate metabolism - Zea mays (maize); zma01100 Metabolic pathways - Zea mays (maize); zma00250 Alanine, aspartate and glutamate metabolism - Zea mays (maize);	IPR016161; IPR015590; IPR016163;	Aldehyde/histidinol dehydrogenase; Aldehyde dehydrogenase domain; Aldehyde dehydrogenase, C-terminal;
Zm00001d013641_P001	HSP20-like chaperones superfamily protein	0.724	Down	0.00604	cytoplasm				IPR002068; IPR008978;	Alpha crystallin/Hsp20 domain; HSP20-like chaperone;
Zm00001d017274_P001	Phenylalanine ammonia-lyase	0.723	Down	0.0007636	chloroplast	K13064	PTAL; phenylalanine/tyrosine ammonia-lyase [EC:4.3.1.25]	zma00940 Phenylpropanoid biosynthesis - Zea mays (maize); zma01110 Biosynthesis of secondary metabolites - Zea mays (maize); zma01100 Metabolic pathways - Zea mays (maize); zma00360 Phenylalanine metabolism - Zea mays (maize);	IPR024083; IPR008948; IPR023144;	Fumarase/histidase, N-terminal; L-Aspartase-like; Phenylalanine ammonia-lyase, shielding domain;
Zm00001d020236_P001	uncharacterized protein	0.721	Down	0.0047363	cytoplasm
Zm00001d033531_P001	F1N21.17	0.721	Down	0.00154489	nucleus
Zm00001d027540_P001	glutathione S-transferase12 One of 12 Type I GSTs typed by sequence similarity GN= gst12	0.721	Down	0.000176702	nucleus	K00799	GST; glutathione S-transferase [EC:2.5.1.18]	zma00480 Glutathione metabolism - Zea mays (maize);	IPR004046; IPR010987; IPR004045; IPR012336; IPR034347;	Glutathione S-transferase, C-terminal; Glutathione S-transferase, C-terminal-like; Glutathione S-transferase, N-terminal; Thioredoxin-like fold; Glutathione S-transferases Phi, C-terminal;
Zm00001d045484_P001	glycosyl hydrolase family 81 protein	0.72	Down	0.0154808	chloroplast	K01180
Zm00001d046915_P001	Putative AMP-dependent synthetase and ligase superfamily protein	0.719	Down	8.3082e-05	chloroplast	K01904	4CL; 4-coumarate--CoA ligase [EC:6.2.1.12]	zma00940 Phenylpropanoid biosynthesis - Zea mays (maize); zma01110 Biosynthesis of secondary metabolites - Zea mays (maize); zma01100 Metabolic pathways - Zea mays (maize); zma00130 Ubiquinone and other terpenoid-quinone biosynthesis - Zea mays (maize); zma00360 Phenylalanine metabolism - Zea mays (maize);	IPR025110; IPR000873;	AMP-binding enzyme C-terminal domain; AMP-dependent synthetase/ligase;
Zm00001d008983_P007	P-loop containing nucleoside triphosphate hydrolases superfamily protein	0.719	Down	0.00077534	vacuolar membrane				IPR003959; IPR003593; IPR027417;	ATPase, AAA-type, core; AAA+ ATPase domain; P-loop containing nucleoside triphosphate hydrolase;
Zm00001d015618_P001	Probable cinnamyl alcohol dehydrogenase	0.719	Down	0.00116039	cytoplasm	K00083	E1.1.1.195; cinnamyl-alcohol dehydrogenase [EC:1.1.1.195]	zma00940 Phenylpropanoid biosynthesis - Zea mays (maize); zma01110 Biosynthesis of secondary metabolites - Zea mays (maize); zma01100 Metabolic pathways - Zea mays (maize);	IPR011032; IPR020843; IPR016040; IPR013154; IPR013149;	GroES-like; Polyketide synthase, enoylreductase domain; NAD(P)-binding domain; Alcohol dehydrogenase, N-terminal; Alcohol dehydrogenase, C-terminal;
Zm00001d045599_P001	Monocopper oxidase-like protein SKU5	0.718	Down	0.00049658	plasma membrane				IPR034273; IPR011707; IPR011706; IPR008972; IPR001117;	Ascorbate oxidase homologue, first cupredoxin domain; Multicopper oxidase, type 3; Multicopper oxidase, type 2; Cupredoxin; Multicopper oxidase, type 1;
Zm00001d009990_P003	Superoxide dismutase [Mn] 3.4%2C mitochondrial	0.717	Down	0.014616	mitochondria	K04564	SOD2; superoxide dismutase, Fe-Mn family [EC:1.15.1.1]	zma04146 Peroxisome - Zea mays (maize);	IPR019831; IPR019832;	Manganese/iron superoxide dismutase, N-terminal; Manganese/iron superoxide dismutase, C-terminal;
Zm00001d038653_P001	uncharacterized protein	0.716	Down	0.0003561	cytoplasm	K03671			IPR012336; IPR013766;	Thioredoxin-like fold; Thioredoxin domain;
Zm00001d005421_P009	Aquaporin PIP2-2	0.716	Down	0.0051955	cytoplasm	K09872			IPR023271;	Aquaporin-like;
Zm00001d042111_P001	"tassels replace upper ears1 upper ear branches tassel-like, tillers bear ears GN= tru1"	0.716	Down	0.0020786	chloroplast	K14508	NPR1; regulatory protein NPR1	zma04075 Plant hormone signal transduction - Zea mays (maize);	IPR011333; IPR024228; IPR020683; IPR000210;	SKP1/BTB/POZ domain; Regulatory protein NPR, central domain; Ankyrin repeat-containing domain; BTB/POZ domain;
Zm00001d032036_P001	Probable carboxylesterase 8	0.714	Down	0.021257	cytoplasm				IPR029058; IPR013094;	Alpha/Beta hydrolase fold; Alpha/beta hydrolase fold-3;
Zm00001d037573_P002	USP family protein	0.713	Down	0.00092047	cytoplasm				IPR006016; IPR014729;	UspA; Rossmann-like alpha/beta/alpha sandwich fold;
Zm00001d034581_P018	uncharacterized protein	0.712	Down	0.0114626	cytoplasm
Zm00001d019565_P003	Aquaporin PIP2-6	0.711	Down	0.0011366	chloroplast	K09872			IPR023271;	Aquaporin-like;
Zm00001d004689_P001	O-methyltransferase ZRP4	0.71	Down	6.0657e-05	cytoplasm				IPR011991; IPR012967; IPR029063; IPR001077;	Winged helix-turn-helix DNA-binding domain; Plant methyltransferase dimerisation; S-adenosyl-L-methionine-dependent methyltransferase; O-methyltransferase, family 2;
Zm00001d003087_P003	CLIP-associated protein	0.709	Down	0.0071039	chloroplast	K16578			IPR034085; IPR011989; IPR024395; IPR016024;	TOG domain; Armadillo-like helical; CLASP N-terminal domain; Armadillo-type fold;
Zm00001d014272_P001	Has 30201 Blast hits to 17322 proteins in 780 species Archae - 12 GN=BEST Arabidopsis thaliana protein match is: eukaryotic initiation factor 4A-III (TAIR:AT3G19760.1)	0.709	Down	0.033756	chloroplast				IPR027417;	P-loop containing nucleoside triphosphate hydrolase;
Zm00001d020032_P001	Probable carboxylesterase 15	0.707	Down	0.026437	chloroplast				IPR029058; IPR013094;	Alpha/Beta hydrolase fold; Alpha/beta hydrolase fold-3;
Zm00001d017847_P003	Outer envelope pore protein 16-3 chloroplastic/mitochondrial	0.707	Down	0.0051215	cytoplasm
ZeamMp113	uncharacterized protein	0.707	Down	0.0061977	plasma membrane	K00412			IPR027387; IPR005798; IPR016174; IPR005797;	Cytochrome b/b6-like domain; Cytochrome b/b6, C-terminal; Di-haem cytochrome, transmembrane; Cytochrome b/b6, N-terminal;
Zm00001d023376_P002	"aluminum-induced protein homolog1 leaf cDNA csu359 similar to wheat aluminum-induced protein, GenBank accession L28008 GN= alp1"	0.706	Down	0.0026597	cytoplasm				IPR024286; IPR029055;	Domain of unknown function DUF3700; Nucleophile aminohydrolases, N-terminal;
Zm00001d031128_P006	5-methyltetrahydropteroyltriglutamate--homocysteine methyltransferase 1	0.706	Down	0.0161983	cytoskeleton	K00549	metE; 5-methyltetrahydropteroyltriglutamate--homocysteine methyltransferase [EC:2.1.1.14]	zma01230 Biosynthesis of amino acids - Zea mays (maize); zma01110 Biosynthesis of secondary metabolites - Zea mays (maize); zma01100 Metabolic pathways - Zea mays (maize); zma00450 Selenocompound metabolism - Zea mays (maize); zma00270 Cysteine and methionine metabolism - Zea mays (maize);	IPR002629;	Cobalamin-independent methionine synthase MetE, C-terminal/archaeal;
Zm00001d035637_P001	uncharacterized protein	0.706	Down	0.00038342	cytoplasm
Zm00001d004154_P001	Cleavage and polyadenylation specificity factor subunit 1	0.705	Down	0.0131572	nucleus	K14401	CPSF1; cleavage and polyadenylation specificity factor subunit 1	zma03015 mRNA surveillance pathway - Zea mays (maize);	IPR004871;	Cleavage/polyadenylation specificity factor, A subunit, C-terminal;
Zm00001d017617_P001	Mitochondrial import inner membrane translocase subunit TIM13	0.701	Down	0.044243	chloroplast	K17781			IPR004217;	Tim10/DDP family zinc finger;
Zm00001d018954_P002	Rhicadhesin receptor	0.701	Down	0.017543	chloroplast				IPR011051; IPR006045; IPR014710;	RmlC-like cupin domain; Cupin 1; RmlC-like jelly roll fold;
Zm00001d018809_P001	"glutathione transferase6 cDNA, functionally expressed in E. coli GN= gst6"	0.7	Down	0.00028281	cytoplasm	K00799	GST; glutathione S-transferase [EC:2.5.1.18]	zma00480 Glutathione metabolism - Zea mays (maize);	IPR010987; IPR004045; IPR012336;	Glutathione S-transferase, C-terminal-like; Glutathione S-transferase, N-terminal; Thioredoxin-like fold;
Zm00001d006570_P001	uncharacterized protein	0.7	Down	0.0173767	chloroplast
Zm00001d017945_P001	ADP-ribosylation factor-like A1A	0.694	Down	0.0031402	nucleus	K07955			IPR005225; IPR027417;	Small GTP-binding protein domain; P-loop containing nucleoside triphosphate hydrolase;
Zm00001d040202_P006	SNF7 family protein	0.694	Down	0.0052403	chloroplast
Zm00001d004071_P001	uncharacterized protein	0.693	Down	0.00053933	chloroplast				IPR011990;	Tetratricopeptide-like helical domain;
Zm00001d048354_P001	glutathione transferase9 GN= gst9	0.692	Down	0.031896	cytoplasm	K00799	GST; glutathione S-transferase [EC:2.5.1.18]	zma00480 Glutathione metabolism - Zea mays (maize);	IPR010987; IPR004046; IPR004045; IPR012336; IPR034347;	Glutathione S-transferase, C-terminal-like; Glutathione S-transferase, C-terminal; Glutathione S-transferase, N-terminal; Thioredoxin-like fold; Glutathione S-transferases Phi, C-terminal;
Zm00001d041186_P001	Protein kinase family protein	0.691	Down	0.022403	nucleus
Zm00001d033028_P003	Colon cancer-associated protein Mic1-like containing protein expressed	0.691	Down	0.0035567	chloroplast				IPR009755;	Colon cancer-associated Mic1-like;
Zm00001d011125_P001	Putative USP family protein	0.689	Down	0.0030173	chloroplast				IPR006016; IPR014729;	UspA; Rossmann-like alpha/beta/alpha sandwich fold;
Zm00001d023984_P001	GDSL esterase/lipase	0.685	Down	0.036364	chloroplast				IPR001087; IPR013830;	GDSL lipase/esterase; SGNH hydrolase-type esterase domain;
Zm00001d048627_P002	ATP-citrate synthase alpha chain protein 3	0.685	Down	0.029883	cytoplasm	K01648	ACLY; ATP citrate (pro-S)-lyase [EC:2.3.3.8]	zma01110 Biosynthesis of secondary metabolites - Zea mays (maize); zma01100 Metabolic pathways - Zea mays (maize); zma00020 Citrate cycle (TCA cycle) - Zea mays (maize);	IPR032263; IPR013816; IPR013650; IPR016102;	ATP-citrate synthase, citrate-binding domain; ATP-grasp fold, subdomain 2; ATP-grasp fold, succinyl-CoA synthetase-type; Succinyl-CoA synthetase-like;
Zm00001d044045_P001	GDSL esterase/lipase	0.685	Down	0.0089371	chloroplast				IPR001087; IPR013830;	GDSL lipase/esterase; SGNH hydrolase-type esterase domain;
Zm00001d029903_P002	Expansin-B4	0.684	Down	0.0102639	extracellular				IPR009009; IPR007112; IPR007117;	RlpA-like protein, double-psi beta-barrel domain; Expansin/pollen allergen, DPBB domain; Expansin, cellulose-binding-like domain;
Zm00001d012420_P004	Heat shock 70 kDa protein	0.684	Down	0.0040794	cytoplasm	K03283	HSPA1s; heat shock 70kDa protein 1/2/6/8	zma04144 Endocytosis - Zea mays (maize); zma03040 Spliceosome - Zea mays (maize); zma04141 Protein processing in endoplasmic reticulum - Zea mays (maize);	IPR029048; IPR029047;	Heat shock protein 70kD, C-terminal domain; Heat shock protein 70kD, peptide-binding domain;
Zm00001d015331_P001	early nodulin-like protein 9	0.683	Down	0.031404	extracellular				IPR003245; IPR008972;	Phytocyanin domain; Cupredoxin;
Zm00001d030346_P001	Hsp20/alpha crystallin family protein	0.682	Down	0.00100306	chloroplast				IPR002068; IPR008978;	Alpha crystallin/Hsp20 domain; HSP20-like chaperone;
Zm00001d007267_P002	light harvesting chlorophyll a/b binding protein5 GN= lhcb5	0.682	Down	0.00092358	chloroplast	K08916	LHCB5; light-harvesting complex II chlorophyll a/b binding protein 5	zma01100 Metabolic pathways - Zea mays (maize); zma00196 Photosynthesis - antenna proteins - Zea mays (maize);	IPR023329;	Chlorophyll a/b binding protein domain;
Zm00001d028557_P001	17.4 kDa class I heat shock protein	0.679	Down	0.0040806	cytoplasm	K13993	HSP20; HSP20 family protein	zma04141 Protein processing in endoplasmic reticulum - Zea mays (maize);	IPR002068; IPR008978;	Alpha crystallin/Hsp20 domain; HSP20-like chaperone;
Zm00001d044921_P001	Probable carboxylesterase 2	0.678	Down	0.0038959	cytoplasm				IPR029058; IPR013094;	Alpha/Beta hydrolase fold; Alpha/beta hydrolase fold-3;
Zm00001d038699_P001	O-methyltransferase ZRP4	0.678	Down	0.0050183	cytoplasm				IPR011991; IPR012967; IPR029063; IPR001077;	Winged helix-turn-helix DNA-binding domain; Plant methyltransferase dimerisation; S-adenosyl-L-methionine-dependent methyltransferase; O-methyltransferase, family 2;
Zm00001d022307_P002	10 kDa chaperonin	0.676	Down	0.0154568	cytoplasm	K04078			IPR011032;	GroES-like;
Zm00001d035595_P004	dehydroascorbate reductase like3 GN= dhar3	0.674	Down	0.00028499	cytoplasm	K21888	DHAR; glutathione dehydrogenase/transferase [EC:1.8.5.1 2.5.1.18]	zma00053 Ascorbate and aldarate metabolism - Zea mays (maize); zma01100 Metabolic pathways - Zea mays (maize); zma00480 Glutathione metabolism - Zea mays (maize);	IPR010987; IPR012336; IPR004045;	Glutathione S-transferase, C-terminal-like; Thioredoxin-like fold; Glutathione S-transferase, N-terminal;
Zm00001d033649_P001	Beta-glucosidase 44	0.673	Down	6.1118e-05	chloroplast	K05350	bglB; beta-glucosidase [EC:3.2.1.21]	zma00940 Phenylpropanoid biosynthesis - Zea mays (maize); zma00500 Starch and sucrose metabolism - Zea mays (maize); zma01110 Biosynthesis of secondary metabolites - Zea mays (maize); zma01100 Metabolic pathways - Zea mays (maize); zma00460 Cyanoamino acid metabolism - Zea mays (maize);	IPR017853; IPR013781;	Glycoside hydrolase superfamily; Glycoside hydrolase, catalytic domain;
Zm00001d041711_P005	resistance to sugarcane mosaic virus2 dominant Scmv1 and Scmv2 confer resistance GN= scmv2	0.672	Down	0.00041528	nucleus				IPR011051; IPR014710;	RmlC-like cupin domain; RmlC-like jelly roll fold;
Zm00001d014417_P002	uncharacterized protein	0.672	Down	0.0002636	cytoplasm	K03966	NDUFB10; NADH dehydrogenase (ubiquinone) 1 beta subcomplex subunit 10	zma00190 Oxidative phosphorylation - Zea mays (maize); zma01100 Metabolic pathways - Zea mays (maize);
Zm00001d040274_P002	Importin subunit alpha	0.671	Down	0.047055	chloroplast				IPR002652; IPR011989; IPR016024;	Importin-alpha, importin-beta-binding domain; Armadillo-like helical; Armadillo-type fold;
Zm00001d039566_P001	17.5 kDa class II heat shock protein	0.67	Down	0.0032797	cytoplasm	K13993	HSP20; HSP20 family protein	zma04141 Protein processing in endoplasmic reticulum - Zea mays (maize);	IPR002068; IPR008978;	Alpha crystallin/Hsp20 domain; HSP20-like chaperone;
Zm00001d008178_P026	ABC transporter B family member 21	0.67	Down	0.0021846	mitochondria	K05658	ABCB1; ATP-binding cassette, subfamily B (MDR/TAP), member 1 [EC:7.6.2.2]	zma02010 ABC transporters - Zea mays (maize);	IPR003593; IPR003439; IPR027417; IPR011527;	AAA+ ATPase domain; ABC transporter-like; P-loop containing nucleoside triphosphate hydrolase; ABC transporter type 1, transmembrane domain;
Zm00001d008395_P001	3-beta-hydroxysteroid-delta-isomerase	0.669	Down	0.00090457	chloroplast	K01824	EBP; cholestenol Delta-isomerase [EC:5.3.3.5]	zma01110 Biosynthesis of secondary metabolites - Zea mays (maize); zma01100 Metabolic pathways - Zea mays (maize); zma00100 Steroid biosynthesis - Zea mays (maize);	IPR033118;	EXPERA domain;
Zm00001d049120_P001	uncharacterized protein	0.665	Down	0.0031017	cytoplasm
Zm00001d038682_P001	PLASMODESMATA CALLOSE-BINDING PROTEIN 2	0.664	Down	0.003437	extracellular				IPR012946;	X8 domain;
Zm00001d051629_P002	Pyrophosphate--fructose 6-phosphate 1-phosphotransferase subunit alpha 2	0.66	Down	0.030538	cytoplasm	K00895	pfp; diphosphate-dependent phosphofructokinase [EC:2.7.1.90]	zma00030 Pentose phosphate pathway - Zea mays (maize); zma00010 Glycolysis / Gluconeogenesis - Zea mays (maize); zma01110 Biosynthesis of secondary metabolites - Zea mays (maize); zma01100 Metabolic pathways - Zea mays (maize); zma00051 Fructose and mannose metabolism - Zea mays (maize);	IPR013981; IPR000023;	Pyrophosphate-dependent phosphofructokinase, alpha-helical domain; Phosphofructokinase domain;
Zm00001d033753_P001	NADH dehydrogenase [ubiquinone] iron-sulfur protein 1 mitochondrial	0.659	Down	0.00191653	chloroplast	K03934	NDUFS1; NADH dehydrogenase (ubiquinone) Fe-S protein 1 [EC:7.1.1.2 1.6.99.3]	zma00190 Oxidative phosphorylation - Zea mays (maize); zma01100 Metabolic pathways - Zea mays (maize);	IPR019574; IPR006656; IPR001041; IPR012675; IPR015405; IPR006963;	NADH:ubiquinone oxidoreductase, subunit G, iron-sulphur binding; Molybdopterin oxidoreductase; 2Fe-2S ferredoxin-type iron-sulfur binding domain; Beta-grasp domain; NADH-quinone oxidoreductase, chain G, C-terminal; Molybdopterin oxidoreductase, 4Fe-4S domain;
Zm00001d009738_P001	Tubulin gamma-2 chain	0.659	Down	0.0174844	chloroplast	K00600	glyA; glycine hydroxymethyltransferase [EC:2.1.2.1]	zma01230 Biosynthesis of amino acids - Zea mays (maize); zma01200 Carbon metabolism - Zea mays (maize); zma01110 Biosynthesis of secondary metabolites - Zea mays (maize); zma01100 Metabolic pathways - Zea mays (maize); zma00670 One carbon pool by folate - Zea mays (maize); zma00260 Glycine, serine and threonine metabolism - Zea mays (maize); zma00630 Glyoxylate and dicarboxylate metabolism - Zea …	IPR015424; IPR003008;	Pyridoxal phosphate-dependent transferase; Tubulin/FtsZ, GTPase domain;
Zm00001d011034_P003	dehydroascorbate reductase like1 GN= dhar1	0.657	Down	0.000115177	cytoplasm	K21888	DHAR; glutathione dehydrogenase/transferase [EC:1.8.5.1 2.5.1.18]	zma00053 Ascorbate and aldarate metabolism - Zea mays (maize); zma01100 Metabolic pathways - Zea mays (maize); zma00480 Glutathione metabolism - Zea mays (maize);	IPR010987; IPR012336; IPR004045;	Glutathione S-transferase, C-terminal-like; Thioredoxin-like fold; Glutathione S-transferase, N-terminal;
Zm00001d023994_P002	Beta-glucosidase%2C chloroplastic	0.656	Down	5.9033e-05	chloroplast	K01188	E3.2.1.21; beta-glucosidase [EC:3.2.1.21]	zma00940 Phenylpropanoid biosynthesis - Zea mays (maize); zma00500 Starch and sucrose metabolism - Zea mays (maize); zma01110 Biosynthesis of secondary metabolites - Zea mays (maize); zma01100 Metabolic pathways - Zea mays (maize); zma00460 Cyanoamino acid metabolism - Zea mays (maize);	IPR017853; IPR013781;	Glycoside hydrolase superfamily; Glycoside hydrolase, catalytic domain;
Zm00001d051043_P001	Acetolactate synthase/ amino acid binding protein	0.655	Down	0.0195187	mitochondria	K01653	E2.2.1.6S; acetolactate synthase I/III small subunit [EC:2.2.1.6]	zma00660 C5-Branched dibasic acid metabolism - Zea mays (maize); zma00650 Butanoate metabolism - Zea mays (maize); zma01230 Biosynthesis of amino acids - Zea mays (maize); zma01110 Biosynthesis of secondary metabolites - Zea mays (maize); zma01210 2-Oxocarboxylic acid metabolism - Zea mays (maize); zma01100 Metabolic pathways - Zea mays (maize); zma00770 Pantothenate and CoA biosynthesis - Zea ma…	IPR002912; IPR019455;	ACT domain; Acetolactate synthase, small subunit, C-terminal;
Zm00001d012274_P001	hydroxycinnamoyltransferase10 GN= hct10	0.652	Down	0.0030808	cytoplasm	K15400	HHT1; omega-hydroxypalmitate O-feruloyl transferase [EC:2.3.1.188]	zma00073 Cutin, suberine and wax biosynthesis - Zea mays (maize);	IPR023213;	Chloramphenicol acetyltransferase-like domain;
Zm00001d005114_P001	Cytochrome b-c1 complex subunit 7-2	0.65	Down	0.034139	mitochondria	K00417	QCR7; ubiquinol-cytochrome c reductase subunit 7	zma00190 Oxidative phosphorylation - Zea mays (maize); zma01100 Metabolic pathways - Zea mays (maize);
Zm00001d042017_P001	Thioredoxin Y1 chloroplastic	0.647	Down	1.78789e-05	chloroplast	K03671			IPR013766; IPR012336;	Thioredoxin domain; Thioredoxin-like fold;
Zm00001d007195_P007	Alpha-L-arabinofuranosidase 1	0.646	Down	0.0092617	cytoplasm	K01209	abfA; alpha-N-arabinofuranosidase [EC:3.2.1.55]	zma00520 Amino sugar and nucleotide sugar metabolism - Zea mays (maize);	IPR010720; IPR017853; IPR008979;	Alpha-L-arabinofuranosidase, C-terminal; Glycoside hydrolase superfamily; Galactose-binding domain-like;
Zm00001d027966_P001	Protein CutA chloroplastic	0.644	Down	0.00067942	mitochondria	K03926			IPR011322;	Nitrogen regulatory PII-like, alpha/beta;
Zm00001d024573_P001	Probable prefoldin subunit 2	0.643	Down	0.021637	cytoplasm	K09549
Zm00001d024839_P001	glutathione S-transferase2 safener-induced GN= gst2	0.64	Down	0.0046001	chloroplast	K00799	GST; glutathione S-transferase [EC:2.5.1.18]	zma00480 Glutathione metabolism - Zea mays (maize);	IPR004046; IPR010987; IPR004045; IPR012336; IPR034347;	Glutathione S-transferase, C-terminal; Glutathione S-transferase, C-terminal-like; Glutathione S-transferase, N-terminal; Thioredoxin-like fold; Glutathione S-transferases Phi, C-terminal;
Zm00001d028773_P001	NADH dehydrogenase [ubiquinone] 1 alpha subcomplex subunit 8-B	0.639	Down	0.044104	chloroplast	K03952	NDUFA8; NADH dehydrogenase (ubiquinone) 1 alpha subcomplex subunit 8	zma00190 Oxidative phosphorylation - Zea mays (maize); zma01100 Metabolic pathways - Zea mays (maize);	IPR010625;	CHCH;
Zm00001d003930_P001	Beta-13-N-Acetylglucosaminyltransferase family protein	0.638	Down	0.0027431	chloroplast
Zm00001d024379_P001	Xyloglucan endotransglucosylase/hydrolase protein 2	0.638	Down	0.00103751	extracellular	K08235			IPR010713; IPR013320; IPR000757;	Xyloglucan endo-transglycosylase, C-terminal; Concanavalin A-like lectin/glucanase domain; Glycoside hydrolase family 16;
Zm00001d022390_P001	Eukaryotic aspartyl protease family protein	0.638	Down	0.0045416	chloroplast				IPR032799; IPR033121; IPR021109; IPR032861;	Xylanase inhibitor, C-terminal; Peptidase family A1 domain; Aspartic peptidase domain; Xylanase inhibitor, N-terminal;
Zm00001d043361_P001	PLASMODESMATA CALLOSE-BINDING PROTEIN 2	0.636	Down	0.025137	chloroplast				IPR012946;	X8 domain;
Zm00001d024963_P001	glutathione transferase22 GN= gst22	0.635	Down	0.000138998	chloroplast	K00799	GST; glutathione S-transferase [EC:2.5.1.18]	zma00480 Glutathione metabolism - Zea mays (maize);	IPR010987; IPR012336; IPR004045;	Glutathione S-transferase, C-terminal-like; Thioredoxin-like fold; Glutathione S-transferase, N-terminal;
Zm00001d019100_P001	Protein YLS3	0.634	Down	0.00183697	chloroplast				IPR016140;	Bifunctional inhibitor/plant lipid transfer protein/seed storage helical domain;
Zm00001d034218_P001	Cytochrome c oxidase subunit 6a mitochondrial	0.632	Down	0.0024558	mitochondria	K02266	COX6A; cytochrome c oxidase subunit 6a	zma00190 Oxidative phosphorylation - Zea mays (maize); zma01100 Metabolic pathways - Zea mays (maize);
Zm00001d039391_P001	uncharacterized protein	0.629	Down	0.00084236	nucleus
Zm00001d036451_P001	uncharacterized protein	0.622	Down	0.0031998	nucleus				IPR003892; IPR009818; IPR009060;	Ubiquitin system component Cue; Ataxin-2, C-terminal; UBA-like;
Zm00001d043991_P001	DNA binding activity2 cDNA pAS12 has binding activity GN= dba2	0.62	Down	0.0075431	cytoplasm	K02150	ATPeV1E; V-type H+-transporting ATPase subunit E	zma04145 Phagosome - Zea mays (maize); zma00190 Oxidative phosphorylation - Zea mays (maize); zma01100 Metabolic pathways - Zea mays (maize);
Zm00001d022604_P002	SNARE-like superfamily protein	0.617	Down	0.037936	cytoplasm	K20301			IPR011012;	Longin-like domain;
Zm00001d019563_P015	Aquaporin PIP2-1	0.616	Down	0.0175589	plasma membrane	K09872			IPR023271;	Aquaporin-like;
Zm00001d028963_P001	14 kDa zinc-binding protein	0.616	Down	0.00046458	cytoplasm	K02503			IPR011146;	HIT-like domain;
Zm00001d048123_P001	MFP1 attachment factor1 cDNA GN= maf1	0.616	Down	0.039165	nucleus				IPR025265;	WPP domain;
Zm00001d013066_P008	Histone H1	0.615	Down	0.0117977	nucleus	K11275			IPR011991; IPR005818;	Winged helix-turn-helix DNA-binding domain; Linker histone H1/H5, domain H15;
Zm00001d014957_P009	Translationally-controlled tumor protein homolog	0.613	Down	0.000198296	nucleus				IPR011323; IPR011057;	Mss4/translationally controlled tumour-associated TCTP; Mss4-like;
Zm00001d032972_P001	Pathogenesis-related thaumatin superfamily protein	0.612	Down	0.0054012	cytoplasm
Zm00001d007069_P006	NudC domain-containing protein 2	0.61	Down	0.037064	nucleus				IPR007052; IPR008978;	CS domain; HSP20-like chaperone;
Zm00001d044455_P001	OSJNBb0091E11.19 protein	0.61	Down	0.0139163	chloroplast				IPR006946; IPR008979;	Domain of unknown function DUF642; Galactose-binding domain-like;
Zm00001d003896_P004	60S ribosomal protein L12	0.607	Down	0.0040974	cytoplasm	K02870	RP-L12e; large subunit ribosomal protein L12e	zma03010 Ribosome - Zea mays (maize);	IPR020783; IPR020784;	Ribosomal protein L11, C-terminal; Ribosomal protein L11, N-terminal;
Zm00001d052718_P001	60S ribosomal protein L38	0.603	Down	0.0073625	cytoplasm	K02923	RP-L38e; large subunit ribosomal protein L38e	zma03010 Ribosome - Zea mays (maize);
Zm00001d024891_P001	Beta-glucosidase 17	0.602	Down	0.043758	chloroplast	K01188	E3.2.1.21; beta-glucosidase [EC:3.2.1.21]	zma00940 Phenylpropanoid biosynthesis - Zea mays (maize); zma00500 Starch and sucrose metabolism - Zea mays (maize); zma01110 Biosynthesis of secondary metabolites - Zea mays (maize); zma01100 Metabolic pathways - Zea mays (maize); zma00460 Cyanoamino acid metabolism - Zea mays (maize);	IPR017853; IPR013781;	Glycoside hydrolase superfamily; Glycoside hydrolase, catalytic domain;
Zm00001d014983_P001	Serine carboxypeptidase-like 49	0.598	Down	1.78926e-05	extracellular	K16298			IPR029058;	Alpha/Beta hydrolase fold;
Zm00001d007031_P001	Chaperonin	0.598	Down	0.043661	cytoplasm	K04078			IPR011032;	GroES-like;
Zm00001d029636_P001	Protein SRG1	0.597	Down	5.5333e-05	cytoplasm				IPR027443; IPR005123; IPR026992;	Isopenicillin N synthase-like; Oxoglutarate/iron-dependent dioxygenase; Non-haem dioxygenase N-terminal domain;
Zm00001d034635_P001	"chalcone flavanone isomerase1 genomic sequence, gene-specific probe, transcript defined by S1-nuclease protection analysis GN= chi1"	0.594	Down	0.0034424	cytoplasm	K01859	E5.5.1.6; chalcone isomerase [EC:5.5.1.6]	zma01110 Biosynthesis of secondary metabolites - Zea mays (maize); zma01100 Metabolic pathways - Zea mays (maize); zma00941 Flavonoid biosynthesis - Zea mays (maize);	IPR016088; IPR016087;	Chalcone isomerase, 3-layer sandwich; Chalcone isomerase;
Zm00001d032504_P001	Monocopper oxidase-like protein SKU5	0.59	Down	0.0163587	chloroplast				IPR011707; IPR011706; IPR008972; IPR001117;	Multicopper oxidase, type 3; Multicopper oxidase, type 2; Cupredoxin; Multicopper oxidase, type 1;
Zm00001d038192_P001	glutathione transferase41 GN= gst41	0.589	Down	8.184e-05	chloroplast	K00799	GST; glutathione S-transferase [EC:2.5.1.18]	zma00480 Glutathione metabolism - Zea mays (maize);	IPR010987; IPR004045; IPR012336;	Glutathione S-transferase, C-terminal-like; Glutathione S-transferase, N-terminal; Thioredoxin-like fold;
Zm00001d047503_P001	Dormancy-associated protein homolog 3	0.586	Down	0.045684	nucleus
Zm00001d010521_P001	Flavonoid 3'-monooxygenase	0.581	Down	1.6751e-05	chloroplast	K05280	CYP75B1; flavonoid 3'-monooxygenase [EC:1.14.14.82]	zma01110 Biosynthesis of secondary metabolites - Zea mays (maize); zma01100 Metabolic pathways - Zea mays (maize); zma00941 Flavonoid biosynthesis - Zea mays (maize); zma00944 Flavone and flavonol biosynthesis - Zea mays (maize);
Zm00001d005495_P001	Ras-related protein RABA2a	0.577	Down	0.02306	chloroplast	K07904	RAB11A; Ras-related protein Rab-11A	zma04144 Endocytosis - Zea mays (maize);	IPR005225; IPR027417;	Small GTP-binding protein domain; P-loop containing nucleoside triphosphate hydrolase;
Zm00001d029899_P001	beta expansin2 expressed specifically in the elongating region of maize primary root GN= expb2	0.565	Down	0.0147799	extracellular				IPR009009; IPR007112; IPR007117;	RlpA-like protein, double-psi beta-barrel domain; Expansin/pollen allergen, DPBB domain; Expansin, cellulose-binding-like domain;
Zm00001d048703_P001	benzoxazinone synthesis4 endoplasmic reticulum P450 monoxygenase GN= bx4	0.557	Down	0.0040601	plasma membrane	K13225	BX4; 3-hydroxyindolin-2-one monooxygenase [EC:1.14.14.109]	zma01110 Biosynthesis of secondary metabolites - Zea mays (maize); zma00402 Benzoxazinoid biosynthesis - Zea mays (maize);
Zm00001d042726_P001	Protein BOLA2	0.557	Down	0.011719	cytoplasm
Zm00001d040061_P001	Carboxylic ester hydrolase	0.554	Down	0.0064217	chloroplast	K19882
Zm00001d020640_P001	Transcription factor partial	0.547	Down	0.005138	chloroplast
Zm00001d049691_P004	Succinate dehydrogenase subunit 6 mitochondrial	0.547	Down	0.022436	mitochondria
Zm00001d003379_P001	Major latex protein 22%3B Pathogenesis-related protein 2	0.545	Down	0.040819	cytoplasm				IPR023393; IPR000916;	START-like domain; Bet v I/Major latex protein;
Zm00001d010728_P003	PLASMODESMATA CALLOSE-BINDING PROTEIN 2	0.534	Down	0.0041786	chloroplast				IPR012946;	X8 domain;
Zm00001d016708_P001	Beta-fructofuranosidase%2C cell wall isozyme	0.529	Down	0.04876	chloroplast
Zm00001d013561_P001	glycosyl hydrolase family 10 protein / carbohydrate-binding domain-containing protein	0.529	Down	0.0020372	cytoplasm				IPR001000; IPR003305; IPR017853; IPR008979; IPR013781;	Glycoside hydrolase family 10 domain; Carbohydrate-binding, CenC-like; Glycoside hydrolase superfamily; Galactose-binding domain-like; Glycoside hydrolase, catalytic domain;
Zm00001d025018_P001	Expansin-A11	0.527	Down	0.033196	chloroplast				IPR009009; IPR007112; IPR007117;	RlpA-like protein, double-psi beta-barrel domain; Expansin/pollen allergen, DPBB domain; Expansin, cellulose-binding-like domain;
Zm00001d040364_P001	Peroxidase 72	0.524	Down	3.4995e-06	extracellular	K00430	E1.11.1.7; peroxidase [EC:1.11.1.7]	zma00940 Phenylpropanoid biosynthesis - Zea mays (maize); zma01110 Biosynthesis of secondary metabolites - Zea mays (maize); zma01100 Metabolic pathways - Zea mays (maize);	IPR033905; IPR002016;	Secretory peroxidase; Haem peroxidase, plant/fungal/bacterial;
Zm00001d047765_P001	Glutathione S-transferase L2 chloroplastic	0.519	Down	0.00049793	cytoplasm	K00799	GST; glutathione S-transferase [EC:2.5.1.18]	zma00480 Glutathione metabolism - Zea mays (maize);	IPR010987; IPR004045; IPR012336;	Glutathione S-transferase, C-terminal-like; Glutathione S-transferase, N-terminal; Thioredoxin-like fold;
Zm00001d032618_P001	Secretory protein	0.516	Down	0.00053779	mitochondria
Zm00001d048705_P001	benzoxazinone synthesis5 endoplasmic reticulum monoxygenase GN= bx5	0.506	Down	0.000139026	chloroplast	K13226	BX5; 2-hydroxy-1,4-benzoxazin-3-one monooxygenase [EC:1.14.14.110]	zma01110 Biosynthesis of secondary metabolites - Zea mays (maize); zma00402 Benzoxazinoid biosynthesis - Zea mays (maize);
Zm00001d013945_P001	Ripening-related protein 3	0.49	Down	0.0051165	chloroplast				IPR009009;	RlpA-like protein, double-psi beta-barrel domain;
Zm00001d027524_P001	Basic endochitinase B	0.482	Down	0.00039728	chloroplast	K20547	CHIB; basic endochitinase B [EC:3.2.1.14]	zma00520 Amino sugar and nucleotide sugar metabolism - Zea mays (maize); zma01100 Metabolic pathways - Zea mays (maize); zma04016 MAPK signaling pathway - plant - Zea mays (maize);	IPR023346; IPR000726;	Lysozyme-like domain; Glycoside hydrolase, family 19, catalytic;
Zm00001d003016_P002	phenylalanine ammonia lyase2 GN= pal2	0.478	Down	7.5434e-05	chloroplast	K13064	PTAL; phenylalanine/tyrosine ammonia-lyase [EC:4.3.1.25]	zma00940 Phenylpropanoid biosynthesis - Zea mays (maize); zma01110 Biosynthesis of secondary metabolites - Zea mays (maize); zma01100 Metabolic pathways - Zea mays (maize); zma00360 Phenylalanine metabolism - Zea mays (maize);	IPR024083; IPR008948; IPR023144;	Fumarase/histidase, N-terminal; L-Aspartase-like; Phenylalanine ammonia-lyase, shielding domain;
Zm00001d003757_P001	Bifunctional inhibitor/lipid-transfer protein/seed storage 2S albumin superfamily protein	0.459	Down	0.00113616	extracellular				IPR016140;	Bifunctional inhibitor/plant lipid transfer protein/seed storage helical domain;
Zm00001d034547_P001	uncharacterized protein	0.41	Down	0.021239	chloroplast				IPR006946;	Domain of unknown function DUF642;
Zm00001d052651_P001	Probable xyloglucan endotransglucosylase/hydrolase protein 5	0.395	Down	0.0095434	extracellular	K08235			IPR010713; IPR013320; IPR000757;	Xyloglucan endo-transglycosylase, C-terminal; Concanavalin A-like lectin/glucanase domain; Glycoside hydrolase family 16;
Zm00001d028260_P003	"glutamine synthetase6 cytosolic GS1-1 isoform, gene specific cDNA probe, 6-member nuclear gene family GN= gln6"	0.395	Down	0.0033242	cytoplasm	K01915	glnA; glutamine synthetase [EC:6.3.1.2]	zma01230 Biosynthesis of amino acids - Zea mays (maize); zma01100 Metabolic pathways - Zea mays (maize); zma00250 Alanine, aspartate and glutamate metabolism - Zea mays (maize); zma00630 Glyoxylate and dicarboxylate metabolism - Zea mays (maize); zma00910 Nitrogen metabolism - Zea mays (maize); zma00220 Arginine biosynthesis - Zea mays (maize);	IPR008146; IPR008147; IPR014746;	Glutamine synthetase, catalytic domain; Glutamine synthetase, beta-Grasp domain; Glutamine synthetase/guanido kinase, catalytic domain;
Zm00001d048702_P001	benzoxazinone synthesis3 endoplasmic reticulum monoxygenase GN= bx3	0.393	Down	0.004398	chloroplast	K13224	BX3; indolin-2-one monooxygenase [EC:1.14.14.157]	zma01110 Biosynthesis of secondary metabolites - Zea mays (maize); zma00402 Benzoxazinoid biosynthesis - Zea mays (maize);
Zm00001d032501_P002	Endonuclease 1	0.315	Down	0.041481	extracellular				IPR008947;	Phospholipase C/P1 nuclease domain;
Zm00001d035689_P001	cysteine protease5 apoplastic GN= ccp5	0.313	Down	0.000157701	extracellular	K16290			IPR013201; IPR000668;	Cathepsin propeptide inhibitor domain (I29); Peptidase C1A, papain C-terminal;

## Sheet: 2dpi vs 0dpi 
Protein accession	Protein description	2 dpi/0 dpi Ratio	Regulated Type	2 dpi/0 dpi P value	Subcellular localization	KEGG KO No.	KEGG Gene	KEGG pathway	IPR ID	Domain description
Zm00001d019920_P009	Protein SMG7	29.837	Up	4.0693e-05	chloroplast	K14409	SMG7; protein SMG7	zma03015 mRNA surveillance pathway - Zea mays (maize);	IPR011990; IPR018834;	Tetratricopeptide-like helical domain; DNA/RNA-binding domain, Est1-type;
Zm00001d043651_P002	Tryptophan aminotransferase-related protein 4	16.213	Up	0.034177	extracellular				IPR006947; IPR015424; IPR006948; IPR015421; IPR015422;	EGF-like, alliinase; Pyridoxal phosphate-dependent transferase; Alliinase, C-terminal; Pyridoxal phosphate-dependent transferase, major region, subdomain 1; Pyridoxal phosphate-dependent transferase, major region, subdomain 2;
Zm00001d051591_P001	histone 2B5 cDNA from unfertilized maize ovule, similar to histone 2B, distinct from previous sequences reported GN= his2b5	14.036	Up	0.000139361	nucleus	K11252			IPR009072; IPR007125;	Histone-fold; Histone H2A/H2B/H3;
Zm00001d024853_P001	1-aminocyclopropane-1-carboxylate oxidase15 GN= acco15	12.238	Up	0.0067433	chloroplast	K05933	E1.14.17.4; aminocyclopropanecarboxylate oxidase [EC:1.14.17.4]	zma01110 Biosynthesis of secondary metabolites - Zea mays (maize); zma01100 Metabolic pathways - Zea mays (maize); zma00270 Cysteine and methionine metabolism - Zea mays (maize);	IPR005123; IPR027443; IPR026992;	Oxoglutarate/iron-dependent dioxygenase; Isopenicillin N synthase-like; Non-haem dioxygenase N-terminal domain;
Zm00001d050100_P001	Histone H2B.2	11.328	Up	0.00046041	nucleus	K11252			IPR009072; IPR007125;	Histone-fold; Histone H2A/H2B/H3;
Zm00001d012322_P002	cytochrome P450 family 81 subfamily D polypeptide 8	9.19	Up	0.002883	chloroplast
Zm00001d028816_P001	Pathogenesis-related protein 10	8.26	Up	5.7381e-07	cytoplasm				IPR000916; IPR023393;	Bet v I/Major latex protein; START-like domain;
Zm00001d040248_P001	Laccase-7	7.738	Up	0.0034032	chloroplast	K05909			IPR011706; IPR008972; IPR011707; IPR034285; IPR034288; IPR001117;	Multicopper oxidase, type 2; Cupredoxin; Multicopper oxidase, type 3; Laccase, second cupredoxin domain; Laccase, first cupredoxin domain; Multicopper oxidase, type 1;
Zm00001d003188_P001	Endochitinase EP3	7.621	Up	0.0061375	chloroplast	K01183	E3.2.1.14; chitinase [EC:3.2.1.14]	zma00520 Amino sugar and nucleotide sugar metabolism - Zea mays (maize); zma01100 Metabolic pathways - Zea mays (maize);	IPR023346; IPR000726; IPR001002;	Lysozyme-like domain; Glycoside hydrolase, family 19, catalytic; Chitin-binding, type 1;
Zm00001d024207_P005	Alpha-humulene/(-)-(E)-beta-caryophyllene synthase	7.402	Up	0.029403	chloroplast	K15797	TPS6_11; (S)-beta-macrocarpene synthase [EC:5.5.1.17]	zma00909 Sesquiterpenoid and triterpenoid biosynthesis - Zea mays (maize);	IPR005630; IPR008949; IPR008930; IPR001906;	Terpene synthase, metal-binding domain; Isoprenoid synthase domain; Terpenoid cyclases/protein prenyltransferase alpha-alpha toroid; Terpene synthase, N-terminal domain;
Zm00001d023779_P001	3-hydroxyisobutyryl-CoA hydrolase 1	7.042	Up	1.7552e-06	nucleus	K05605	HIBCH; 3-hydroxyisobutyryl-CoA hydrolase [EC:3.1.2.4]	zma01200 Carbon metabolism - Zea mays (maize); zma00640 Propanoate metabolism - Zea mays (maize); zma00410 beta-Alanine metabolism - Zea mays (maize); zma01100 Metabolic pathways - Zea mays (maize); zma00280 Valine, leucine and isoleucine degradation - Zea mays (maize);	IPR029045;	ClpP/crotonase-like domain;
Zm00001d024664_P001	Tyrosine decarboxylase 1	6.801	Up	0.0140191	cytoplasm	K01593	DDC; aromatic-L-amino-acid/L-tryptophan decarboxylase [EC:4.1.1.28 4.1.1.105]	zma00380 Tryptophan metabolism - Zea mays (maize); zma00950 Isoquinoline alkaloid biosynthesis - Zea mays (maize); zma01110 Biosynthesis of secondary metabolites - Zea mays (maize); zma01100 Metabolic pathways - Zea mays (maize); zma00965 Betalain biosynthesis - Zea mays (maize); zma00350 Tyrosine metabolism - Zea mays (maize); zma00360 Phenylalanine metabolism - Zea mays (maize);	IPR015424; IPR015422; IPR015421;	Pyridoxal phosphate-dependent transferase; Pyridoxal phosphate-dependent transferase, major region, subdomain 2; Pyridoxal phosphate-dependent transferase, major region, subdomain 1;
Zm00001d009118_P001	Adenine nucleotide alpha hydrolases-like superfamily protein	6.796	Up	1.844e-06	cytoplasm				IPR014729; IPR006016;	Rossmann-like alpha/beta/alpha sandwich fold; UspA;
Zm00001d041378_P003	Histone acetyltransferase HAC2	6.784	Up	0.00013527	nucleus	K04498			IPR031162; IPR000197; IPR000433; IPR011031;	CBP/p300-type histone acetyltransferase domain; Zinc finger, TAZ-type; Zinc finger, ZZ-type; Multihaem cytochrome;
Zm00001d040468_P001	major facilitator superfamily defense1 Defense-inducible protein related to integral membrane permeases and bacterial antiporters GN= mfsd1	6.688	Up	0.0172014	vacuolar membrane				IPR020846;	Major facilitator superfamily domain;
Zm00001d053554_P001	Peroxidase 52	6.625	Up	8.3191e-05	chloroplast	K00430	E1.11.1.7; peroxidase [EC:1.11.1.7]	zma00940 Phenylpropanoid biosynthesis - Zea mays (maize); zma01110 Biosynthesis of secondary metabolites - Zea mays (maize); zma01100 Metabolic pathways - Zea mays (maize);	IPR033905; IPR002016;	Secretory peroxidase; Haem peroxidase, plant/fungal/bacterial;
Zm00001d052336_P001	Peroxidase 67	6.561	Up	0.00047848	chloroplast	K00430	E1.11.1.7; peroxidase [EC:1.11.1.7]	zma00940 Phenylpropanoid biosynthesis - Zea mays (maize); zma01110 Biosynthesis of secondary metabolites - Zea mays (maize); zma01100 Metabolic pathways - Zea mays (maize);	IPR033905; IPR002016;	Secretory peroxidase; Haem peroxidase, plant/fungal/bacterial;
Zm00001d007810_P003	40S ribosomal protein S15-4	6.531	Up	0.0056613	cytoplasm	K02958	RP-S15e; small subunit ribosomal protein S15e	zma03010 Ribosome - Zea mays (maize);	IPR023575;	Ribosomal protein S19, superfamily;
Zm00001d034638_P003	ras-related protein ARA-3 GN= ara3	6.473	Up	0.001202	cytoplasm	K07901	RAB8A; Ras-related protein Rab-8A	zma04144 Endocytosis - Zea mays (maize);	IPR005225; IPR027417;	Small GTP-binding protein domain; P-loop containing nucleoside triphosphate hydrolase;
Zm00001d000294_P001	O-succinylhomoserine sulfhydrylase	6.266	Up	1.9508e-06	chloroplast	K01761	E4.4.1.11; methionine-gamma-lyase [EC:4.4.1.11]	zma00450 Selenocompound metabolism - Zea mays (maize); zma00270 Cysteine and methionine metabolism - Zea mays (maize);	IPR015424; IPR015421; IPR015422;	Pyridoxal phosphate-dependent transferase; Pyridoxal phosphate-dependent transferase, major region, subdomain 1; Pyridoxal phosphate-dependent transferase, major region, subdomain 2;
Zm00001d011486_P008	CTP synthase family protein	6.047	Up	3.7827e-05	cytoplasm	K01937	pyrG; CTP synthase [EC:6.3.4.2]	zma00240 Pyrimidine metabolism - Zea mays (maize); zma01100 Metabolic pathways - Zea mays (maize);	IPR017456; IPR027417; IPR017926; IPR033828; IPR029062;	CTP synthase, N-terminal; P-loop containing nucleoside triphosphate hydrolase; Glutamine amidotransferase; CTP synthase GATase domain; Class I glutamine amidotransferase-like;
Zm00001d011080_P001	Protease inhibitor%3B Proteinase inhibitor	5.986	Up	0.00128332	cytoplasm
Zm00001d024752_P001	Peroxidase 64	5.716	Up	0.0003595	extracellular	K00430	E1.11.1.7; peroxidase [EC:1.11.1.7]	zma00940 Phenylpropanoid biosynthesis - Zea mays (maize); zma01110 Biosynthesis of secondary metabolites - Zea mays (maize); zma01100 Metabolic pathways - Zea mays (maize);	IPR033905; IPR002016;	Secretory peroxidase; Haem peroxidase, plant/fungal/bacterial;
Zm00001d049984_P001	uncharacterized protein	5.685	Up	0.0083385	nucleus
Zm00001d050455_P001	Anthranilate N-benzoyltransferase protein 1	5.641	Up	0.041659	chloroplast	K13065	E2.3.1.133; shikimate O-hydroxycinnamoyltransferase [EC:2.3.1.133]	zma00940 Phenylpropanoid biosynthesis - Zea mays (maize); zma01110 Biosynthesis of secondary metabolites - Zea mays (maize); zma01100 Metabolic pathways - Zea mays (maize); zma00945 Stilbenoid, diarylheptanoid and gingerol biosynthesis - Zea mays (maize); zma00941 Flavonoid biosynthesis - Zea mays (maize);	IPR023213;	Chloramphenicol acetyltransferase-like domain;
Zm00001d021362_P001	growth-regulating factor 9	5.614	Up	0.0145991	nucleus				IPR014978; IPR014977;	Glutamine-Leucine-Glutamine, QLQ; WRC domain;
Zm00001d028815_P001	AccQ41298_SORBI] GN=Pathogenesis-related protein [source:UniProtKB/TrEMBL	5.604	Up	2.08e-05	cytoplasm				IPR023393; IPR000916;	START-like domain; Bet v I/Major latex protein;
Zm00001d001959_P002	GTP cyclohydrolase I 1	5.581	Up	0.00078206	cytoplasm	K01495	GCH1; GTP cyclohydrolase IA [EC:3.5.4.16]	zma00790 Folate biosynthesis - Zea mays (maize); zma01100 Metabolic pathways - Zea mays (maize);	IPR020602;	GTP cyclohydrolase I domain;
Zm00001d043350_P001	Probable indole-3-acetic acid-amido synthetase GH3.1	5.545	Up	0.0049572	chloroplast	K14487	GH3; auxin responsive GH3 gene family	zma04075 Plant hormone signal transduction - Zea mays (maize);
Zm00001d011713_P008	Myosin family protein with Dil domain	5.522	Up	4.0735e-05	cytoplasm	K10357			IPR002710; IPR001609; IPR027417;	Dilute domain; Myosin head, motor domain; P-loop containing nucleoside triphosphate hydrolase;
Zm00001d040697_P001	S-adenosylmethionine synthase 1	5.297	Up	0.0079803	cytoplasm	K00789	metK; S-adenosylmethionine synthetase [EC:2.5.1.6]	zma01230 Biosynthesis of amino acids - Zea mays (maize); zma01110 Biosynthesis of secondary metabolites - Zea mays (maize); zma01100 Metabolic pathways - Zea mays (maize); zma00270 Cysteine and methionine metabolism - Zea mays (maize);	IPR022636; IPR022628; IPR022629; IPR022630;	S-adenosylmethionine synthetase superfamily; S-adenosylmethionine synthetase, N-terminal; S-adenosylmethionine synthetase, central domain; S-adenosylmethionine synthetase, C-terminal;
Zm00001d041871_P001	ATP binding / calcium ion binding / calmodulin-dependent protein kinase/ kinase/ protein kinase/ protein serine/threonine kinase GN=AT4G04720 (E=5e-040) CPK21 | CPK21	5.256	Up	0.0107556	nucleus	K13412	CPK; calcium-dependent protein kinase [EC:2.7.11.1]	zma04626 Plant-pathogen interaction - Zea mays (maize);	IPR011992; IPR002048; IPR011009;	EF-hand domain pair; EF-hand domain; Protein kinase-like domain;
Zm00001d024843_P001	1-aminocyclopropane-1-carboxylate oxidase15 GN= acco31	5.246	Up	0.00173647	cytoplasm	K05933	E1.14.17.4; aminocyclopropanecarboxylate oxidase [EC:1.14.17.4]	zma01110 Biosynthesis of secondary metabolites - Zea mays (maize); zma01100 Metabolic pathways - Zea mays (maize); zma00270 Cysteine and methionine metabolism - Zea mays (maize);	IPR027443; IPR005123; IPR026992;	Isopenicillin N synthase-like; Oxoglutarate/iron-dependent dioxygenase; Non-haem dioxygenase N-terminal domain;
Zm00001d032748_P005	Nucleolin 2	5.097	Up	0.027721	cytoplasm	K11294			IPR000504; IPR012677;	RNA recognition motif domain; Nucleotide-binding alpha-beta plait domain;
Zm00001d050696_P005	Cytochrome b-c1 complex subunit 6	5.078	Up	0.00032464	chloroplast	K00416	QCR6; ubiquinol-cytochrome c reductase subunit 6	zma00190 Oxidative phosphorylation - Zea mays (maize); zma01100 Metabolic pathways - Zea mays (maize);	IPR023184;	Ubiquinol-cytochrome C reductase hinge domain;
Zm00001d021579_P007	Filament-like plant protein 3	5.024	Up	0.0061033	chloroplast
Zm00001d044906_P001	12-oxo-phytodienoic acid reductase2 Cytoplasmic GN= opr2	4.966	Up	0.010481	chloroplast	K05894	OPR; 12-oxophytodienoic acid reductase [EC:1.3.1.42]	zma00592 alpha-Linolenic acid metabolism - Zea mays (maize); zma01110 Biosynthesis of secondary metabolites - Zea mays (maize); zma01100 Metabolic pathways - Zea mays (maize);	IPR001155; IPR013785;	NADH:flavin oxidoreductase/NADH oxidase, N-terminal; Aldolase-type TIM barrel;
Zm00001d023769_P003	Delta(12)-fatty-acid desaturase	4.926	Up	0.00169654	mitochondria				IPR021863; IPR005804;	Fatty acid desaturase, N-terminal; Fatty acid desaturase domain;
Zm00001d025401_P001	abscisic acid stress ripening5 GN= aasr5	4.875	Up	0.00167511	mitochondria
Zm00001d018969_P001	"tryptophan synthase alpha subunit1 With products of orp1 and orp2 genes, forms tryptophan synthase. Plastidic. GN= tsa1"	4.828	Up	0.000118152	chloroplast	K01695	trpA; tryptophan synthase alpha chain [EC:4.2.1.20]	zma01230 Biosynthesis of amino acids - Zea mays (maize); zma01110 Biosynthesis of secondary metabolites - Zea mays (maize); zma01100 Metabolic pathways - Zea mays (maize); zma00260 Glycine, serine and threonine metabolism - Zea mays (maize); zma00400 Phenylalanine, tyrosine and tryptophan biosynthesis - Zea mays (maize);	IPR013785; IPR011060;	Aldolase-type TIM barrel; Ribulose-phosphate binding barrel;
Zm00001d048087_P001	Flavone 3'-O-methyltransferase 1	4.808	Up	0.00085761	cytoplasm	K22440			IPR011991; IPR012967; IPR029063; IPR001077;	Winged helix-turn-helix DNA-binding domain; Plant methyltransferase dimerisation; S-adenosyl-L-methionine-dependent methyltransferase; O-methyltransferase, family 2;
Zm00001d025413_P001	40S ribosomal protein S10-1	4.672	Up	0.005182	nucleus	K02947	RP-S10e; small subunit ribosomal protein S10e	zma03010 Ribosome - Zea mays (maize);	IPR005326;	Plectin/S10, N-terminal;
Zm00001d037656_P001	Xylanase inhibitor protein 1	4.634	Up	0.0132242	extracellular	K01183	E3.2.1.14; chitinase [EC:3.2.1.14]	zma00520 Amino sugar and nucleotide sugar metabolism - Zea mays (maize); zma01100 Metabolic pathways - Zea mays (maize);	IPR001223; IPR017853; IPR013781;	Glycoside hydrolase family 18, catalytic domain; Glycoside hydrolase superfamily; Glycoside hydrolase, catalytic domain;
Zm00001d014134_P001	Ent-cassadiene C2-hydroxylase	4.598	Up	4.1781e-05	chloroplast
Zm00001d041082_P002	kaurene synthase4 GN= ks4	4.594	Up	6.1352e-05	chloroplast	K04121	E4.2.3.19; ent-kaurene synthase [EC:4.2.3.19]	zma00904 Diterpenoid biosynthesis - Zea mays (maize); zma01110 Biosynthesis of secondary metabolites - Zea mays (maize); zma01100 Metabolic pathways - Zea mays (maize);	IPR005630; IPR008949; IPR008930; IPR001906;	Terpene synthase, metal-binding domain; Isoprenoid synthase domain; Terpenoid cyclases/protein prenyltransferase alpha-alpha toroid; Terpene synthase, N-terminal domain;
Zm00001d011838_P001	Glycosyltransferase family 61 protein	4.479	Up	0.0035623	cytoplasm
Zm00001d043998_P006	Ubiquitin-conjugating enzyme E2 8	4.461	Up	0.0100216	nucleus	K06689	UBE2D; ubiquitin-conjugating enzyme E2 D [EC:2.3.2.23]	zma04120 Ubiquitin mediated proteolysis - Zea mays (maize); zma04141 Protein processing in endoplasmic reticulum - Zea mays (maize);	IPR016135; IPR000608;	Ubiquitin-conjugating enzyme/RWD-like; Ubiquitin-conjugating enzyme E2;
Zm00001d032739_P009	Heterogeneous nuclear ribonucleoprotein 1	4.383	Up	0.00054366	nucleus	K14411	MSI; RNA-binding protein Musashi	zma03015 mRNA surveillance pathway - Zea mays (maize);	IPR034131; IPR000504; IPR012677;	DAZ-associated protein 1, RNA recognition motif 2; RNA recognition motif domain; Nucleotide-binding alpha-beta plait domain;
Zm00001d021596_P004	adenosine 5'-phosphosulfate reductase-like1 GN= aprl1	4.38	Up	0.0002787	chloroplast	K05907	APR; adenylyl-sulfate reductase (glutathione) [EC:1.8.4.9]	zma00920 Sulfur metabolism - Zea mays (maize);	IPR014729; IPR002500; IPR013766; IPR012336;	Rossmann-like alpha/beta/alpha sandwich fold; Phosphoadenosine phosphosulphate reductase; Thioredoxin domain; Thioredoxin-like fold;
Zm00001d023768_P001	Delta(12)-fatty-acid desaturase	4.379	Up	0.00011592	chloroplast				IPR021863; IPR005804;	Fatty acid desaturase, N-terminal; Fatty acid desaturase domain;
Zm00001d012561_P003	Cystatin2%3B Cysteine proteinase inhibitor%3B Putative cystatin	4.267	Up	0.0171201	chloroplast				IPR000010;	Cystatin domain;
Zm00001d046004_P003	HGA4	4.266	Up	0.00045695	peroxisome
Zm00001d024702_P001	Tryptophan synthase beta chain 2%2C chloroplastic	4.176	Up	0.00029551	chloroplast	K01696	trpB; tryptophan synthase beta chain [EC:4.2.1.20]	zma01230 Biosynthesis of amino acids - Zea mays (maize); zma01110 Biosynthesis of secondary metabolites - Zea mays (maize); zma01100 Metabolic pathways - Zea mays (maize); zma00260 Glycine, serine and threonine metabolism - Zea mays (maize); zma00400 Phenylalanine, tyrosine and tryptophan biosynthesis - Zea mays (maize);	IPR001926;	Tryptophan synthase beta subunit-like PLP-dependent enzyme;
Zm00001d047453_P003	Villin-2	4.173	Up	0.00035552	nucleus				IPR003128; IPR029006; IPR007123;	Villin headpiece; ADF-H/Gelsolin-like domain; Gelsolin-like domain;
Zm00001d012244_P001	Ubiquitin-like domain-containing CTD phosphatase	4.165	Up	0.00043758	cytoplasm	K17618			IPR029071; IPR000626; IPR011943; IPR004274; IPR023214;	Ubiquitin-related domain; Ubiquitin domain; HAD-superfamily hydrolase, subfamily IIID; FCP1 homology domain; HAD-like domain;
Zm00001d036406_P001	Novel plant SNARE 11	4.164	Up	3.7228e-05	nucleus	K08494
Zm00001d050011_P001	Alpha carbonic anhydrase 7	4.105	Up	0.0168776	chloroplast,mitochondria	K01674	cah; carbonic anhydrase [EC:4.2.1.1]	zma00910 Nitrogen metabolism - Zea mays (maize);	IPR001148;	Alpha carbonic anhydrase;
Zm00001d042143_P001	"glucan endo-1,3-beta-glucosidase homolog1 cDNA sequence homologous to 1,3-beta glucanase, possibly single copy GN= geb1"	4.095	Up	0.022117	chloroplast				IPR017853; IPR013781;	Glycoside hydrolase superfamily; Glycoside hydrolase, catalytic domain;
Zm00001d026278_P001	Whole genome shotgun sequence of line PN40024 scaffold_11.assembly12x (Fragment)	4.086	Up	0.00934	nucleus
Zm00001d013568_P001	Glycine-rich RNA-binding%2C abscisic acid-inducible protein	4.077	Up	1.2086e-07	nucleus				IPR000504; IPR012677;	RNA recognition motif domain; Nucleotide-binding alpha-beta plait domain;
Zm00001d031570_P003	FK506-binding protein 2-1	4.049	Up	0.034516	nucleus
Zm00001d008548_P001	Bowman-Birk type wound-induced proteinase inhibitor WIP1	4.047	Up	0.00047502	extracellular				IPR000877;	Proteinase inhibitor I12, Bowman-Birk;
Zm00001d033483_P001	dehydrin13 GN= dhn13	4.001	Up	0.00107579	nucleus
Zm00001d018438_P002	Ypt/Rab-GAP domain of gyp1p superfamily protein	3.984	Up	0.002722	nucleus				IPR000195;	Rab-GTPase-TBC domain;
Zm00001d037026_P001	uncharacterized protein	3.972	Up	0.0041595	nucleus
Zm00001d026680_P006	Soluble inorganic pyrophosphatase 1	3.969	Up	1.6301e-05	cytoplasm	K01507	ppa; inorganic pyrophosphatase [EC:3.6.1.1]	zma00190 Oxidative phosphorylation - Zea mays (maize);
Zm00001d006753_P001	Indole-3-acetic acid amido synthetase	3.964	Up	0.0162788	chloroplast	K14487	GH3; auxin responsive GH3 gene family	zma04075 Plant hormone signal transduction - Zea mays (maize);
Zm00001d046005_P001	Glycosyltransferase family 61 protein	3.958	Up	0.00036057	cytoplasm
Zm00001d044815_P001	Protein BOBBER 1	3.949	Up	0.0093352	cytoplasm				IPR007052; IPR008978;	CS domain; HSP20-like chaperone;
Zm00001d039821_P001	Histone H2B	3.941	Up	0.00051563	nucleus	K11252			IPR009072; IPR007125;	Histone-fold; Histone H2A/H2B/H3;
Zm00001d017279_P001	phenylalanine ammonia lyase7 GN= pal7	3.915	Up	0.00036078	chloroplast	K10775	PAL; phenylalanine ammonia-lyase [EC:4.3.1.24]	zma00940 Phenylpropanoid biosynthesis - Zea mays (maize); zma01110 Biosynthesis of secondary metabolites - Zea mays (maize); zma01100 Metabolic pathways - Zea mays (maize); zma00360 Phenylalanine metabolism - Zea mays (maize);	IPR024083; IPR008948; IPR023144;	Fumarase/histidase, N-terminal; L-Aspartase-like; Phenylalanine ammonia-lyase, shielding domain;
Zm00001d005789_P001	histone 2B3 genomic sequence selected with his2B cDNA probe GN= his2b3	3.899	Up	0.0054172	nucleus	K11252			IPR009072; IPR007125;	Histone-fold; Histone H2A/H2B/H3;
Zm00001d002847_P001	(+)-neomenthol dehydrogenase	3.872	Up	0.026463	cytoplasm	K15095	E1.1.1.208; (+)-neomenthol dehydrogenase [EC:1.1.1.208]	zma01110 Biosynthesis of secondary metabolites - Zea mays (maize); zma00902 Monoterpenoid biosynthesis - Zea mays (maize);	IPR016040;	NAD(P)-binding domain;
Zm00001d013923_P001	Pentatricopeptide repeat-containing protein mitochondrial	3.83	Up	1.61082e-05	chloroplast				IPR011990;	Tetratricopeptide-like helical domain;
Zm00001d017850_P001	60S ribosomal protein L31	3.813	Up	0.0181847	cytoplasm	K02910	RP-L31e; large subunit ribosomal protein L31e	zma03010 Ribosome - Zea mays (maize);	IPR023621;	Ribosomal protein L31e domain;
Zm00001d029583_P001	Polygalacturonase inhibitor 1	3.809	Up	0.00067873	chloroplast				IPR013210; IPR032675;	Leucine-rich repeat-containing N-terminal, plant-type; Leucine-rich repeat domain, L domain-like;
Zm00001d051934_P001	5-pentadecatrienyl resorcinol O-methyltransferase	3.75	Up	0.0155774	cytoplasm				IPR011991; IPR029063; IPR001077;	Winged helix-turn-helix DNA-binding domain; S-adenosyl-L-methionine-dependent methyltransferase; O-methyltransferase, family 2;
Zm00001d013683_P002	DNA-directed RNA polymerase II subunit 2	3.731	Up	0.009924	cytoplasm	K03010	RPB2; DNA-directed RNA polymerase II subunit RPB2 [EC:2.7.7.6]	zma00240 Pyrimidine metabolism - Zea mays (maize); zma01100 Metabolic pathways - Zea mays (maize); zma03020 RNA polymerase - Zea mays (maize); zma00230 Purine metabolism - Zea mays (maize);	IPR007120; IPR014724; IPR007641; IPR007647;	DNA-directed RNA polymerase, subunit 2, domain 6; RNA polymerase Rpb2, OB-fold; RNA polymerase Rpb2, domain 7; RNA polymerase Rpb2, domain 5;
Zm00001d034514_P001	Germin-like protein subfamily T member 1	3.679	Up	0.0093606	chloroplast				IPR011051; IPR006045; IPR014710;	RmlC-like cupin domain; Cupin 1; RmlC-like jelly roll fold;
Zm00001d046717_P005	Brefeldin A-inhibited guanine nucleotide-exchange protein 1	3.678	Up	0.0027577	plasma membrane	K18442	ARFGEF; brefeldin A-inhibited guanine nucleotide-exchange protein	zma04144 Endocytosis - Zea mays (maize);	IPR023394; IPR000904; IPR016024; IPR015403;	Sec7 domain, alpha orthogonal bundle; Sec7 domain; Armadillo-type fold; Sec7, C-terminal;
Zm00001d008759_P001	Has 43784 Blast hits to 26928 proteins in 1799 species Archae - 86 GN=BEST Arabidopsis thaliana protein match is: copper ion binding (TAIR:AT4G32610.1)	3.65	Up	0.000142497	nucleus
Zm00001d009910_P001	Catalytic/ oxidoreductase%2C acting on NADH or NADPH	3.632	Up	9.4939e-07	chloroplast	K18170
Zm00001d013230_P001	"bentazon resistance1 recessive susceptibility to nicosulfuron (Accent) and mesotrione herbicidesDominant Ben1 resistant, with Ben2 GN= ben1"	3.629	Up	0.0043619	chloroplast
Zm00001d006474_P001	Autophagy-related protein 8a	3.623	Up	0.011323	cytoplasm	K08341	GABARAP; GABA(A) receptor-associated protein	zma04136 Autophagy - other - Zea mays (maize);	IPR029071;	Ubiquitin-related domain;
Zm00001d046318_P001	Putative FAD-binding Berberine family protein	3.619	Up	4.314e-06	chloroplast	K22395	cinnamyl-alcohol dehydrogenase [EC:1.1.1.195]	zma00940 Phenylpropanoid biosynthesis - Zea mays (maize); zma01110 Biosynthesis of secondary metabolites - Zea mays (maize); zma01100 Metabolic pathways - Zea mays (maize);	IPR016166; IPR016169; IPR012951; IPR016167; IPR006094;	FAD-binding, type 2; CO dehydrogenase flavoprotein-like, FAD-binding, subdomain 2; Berberine/berberine-like; FAD-binding, type 2, subdomain 1; FAD linked oxidase, N-terminal;
Zm00001d002490_P001	Plastid-specific 30S ribosomal protein 2	3.619	Up	0.0144232	chloroplast				IPR000504; IPR012677;	RNA recognition motif domain; Nucleotide-binding alpha-beta plait domain;
Zm00001d042104_P001	"glutathione transferase7 cDNA, functionally expressed in E. coli GN= gst7"	3.614	Up	0.0088953	chloroplast	K00799	GST; glutathione S-transferase [EC:2.5.1.18]	zma00480 Glutathione metabolism - Zea mays (maize);	IPR010987; IPR004045; IPR012336;	Glutathione S-transferase, C-terminal-like; Glutathione S-transferase, N-terminal; Thioredoxin-like fold;
Zm00001d041833_P007	tRNA pseudouridine synthase	3.592	Up	0.00026406	cytoplasm	K06173			IPR020103; IPR020097; IPR020095;	Pseudouridine synthase, catalytic domain; Pseudouridine synthase I, TruA, alpha/beta domain; Pseudouridine synthase I, TruA, C-terminal;
Zm00001d034797_P004	diphthamide synthesis DPH2 family protein	3.578	Up	7.9066e-05	chloroplast	K17866
Zm00001d018812_P001	uncharacterized protein	3.544	Up	0.00020167	chloroplast
Zm00001d046234_P002	Inositol oxygenase 2	3.513	Up	4.1303e-05	cytoplasm	K00469	MIOX; inositol oxygenase [EC:1.13.99.1]	zma00053 Ascorbate and aldarate metabolism - Zea mays (maize); zma00562 Inositol phosphate metabolism - Zea mays (maize);
Zm00001d005306_P003	Dynamin-related protein 1E	3.512	Up	0.00282	mitochondria				IPR030381; IPR003130; IPR027417; IPR020850; IPR001401; IPR000375;	Dynamin-type guanine nucleotide-binding (G) domain; Dynamin GTPase effector; P-loop containing nucleoside triphosphate hydrolase; GTPase effector domain; Dynamin, GTPase domain; Dynamin central domain;
Zm00001d018868_P001	uncharacterized protein	3.509	Up	0.0039772	nucleus
Zm00001d029353_P004	benzoxazinone synthesis12 GN= bx12	3.503	Up	0.0159568	cytoplasm				IPR011991; IPR012967; IPR029063; IPR001077;	Winged helix-turn-helix DNA-binding domain; Plant methyltransferase dimerisation; S-adenosyl-L-methionine-dependent methyltransferase; O-methyltransferase, family 2;
Zm00001d047054_P001	Pyruvate kinase	3.497	Up	0.0051351	chloroplast	K00873	PK; pyruvate kinase [EC:2.7.1.40]	zma00010 Glycolysis / Gluconeogenesis - Zea mays (maize); zma01230 Biosynthesis of amino acids - Zea mays (maize); zma01200 Carbon metabolism - Zea mays (maize); zma01110 Biosynthesis of secondary metabolites - Zea mays (maize); zma01100 Metabolic pathways - Zea mays (maize); zma00230 Purine metabolism - Zea mays (maize); zma00620 Pyruvate metabolism - Zea mays (maize);	IPR011037; IPR015813; IPR015794; IPR015806; IPR015795; IPR015793;	Pyruvate kinase-like, insert domain; Pyruvate/Phosphoenolpyruvate kinase-like domain; Pyruvate kinase, alpha/beta; Pyruvate kinase, beta-barrel insert domain; Pyruvate kinase, C-terminal; Pyruvate kinase, barrel;
Zm00001d043727_P001	farnesyl diphosphate synthase3 terpene based defense (Richter et al 2015) GN= fps3	3.434	Up	0.0023213	cytoplasm	K00787	FDPS; farnesyl diphosphate synthase [EC:2.5.1.1 2.5.1.10]	zma00900 Terpenoid backbone biosynthesis - Zea mays (maize); zma01110 Biosynthesis of secondary metabolites - Zea mays (maize); zma01100 Metabolic pathways - Zea mays (maize);	IPR008949;	Isoprenoid synthase domain;
Zm00001d017381_P001	(+)-neomenthol dehydrogenase	3.426	Up	2.0741e-05	cytoplasm	K15095	E1.1.1.208; (+)-neomenthol dehydrogenase [EC:1.1.1.208]	zma01110 Biosynthesis of secondary metabolites - Zea mays (maize); zma00902 Monoterpenoid biosynthesis - Zea mays (maize);	IPR016040;	NAD(P)-binding domain;
Zm00001d046683_P019	Stromal processing peptidase chloroplastic	3.395	Up	0.0043248	chloroplast				IPR007863; IPR011249; IPR011237;	Peptidase M16, C-terminal; Metalloenzyme, LuxS/M16 peptidase-like; Peptidase M16 domain;
Zm00001d023811_P001	Pathogenesis-related protein STH-21	3.392	Up	4.49e-05	cytoplasm				IPR000916; IPR023393;	Bet v I/Major latex protein; START-like domain;
Zm00001d004022_P004	RPM1-interacting protein 4	3.382	Up	0.0099566	nucleus	K13456	RIN4; RPM1-interacting protein 4	zma04626 Plant-pathogen interaction - Zea mays (maize);	IPR008700;	RIN4, pathogenic type III effector avirulence factor Avr cleavage site;
Zm00001d003190_P001	Endochitinase A	3.374	Up	8.3044e-07	extracellular	K01183	E3.2.1.14; chitinase [EC:3.2.1.14]	zma00520 Amino sugar and nucleotide sugar metabolism - Zea mays (maize); zma01100 Metabolic pathways - Zea mays (maize);	IPR023346; IPR000726; IPR001002;	Lysozyme-like domain; Glycoside hydrolase, family 19, catalytic; Chitin-binding, type 1;
Zm00001d003268_P001	Ku70-binding family protein	3.372	Up	0.000183627	nucleus	K18156
Zm00001d001808_P001	Has 475 Blast hits to 467 proteins in 210 species Archae - 0 GN=CONTAINS InterPro DOMAIN/s: Bystin (InterPro:IPR007955)	3.346	Up	6.2227e-05	cytoplasm	K14797
Zm00001d018061_P001	Shikimate kinase	3.343	Up	0.00181988	chloroplast	K00891	E2.7.1.71; shikimate kinase [EC:2.7.1.71]	zma01230 Biosynthesis of amino acids - Zea mays (maize); zma01110 Biosynthesis of secondary metabolites - Zea mays (maize); zma01100 Metabolic pathways - Zea mays (maize); zma00400 Phenylalanine, tyrosine and tryptophan biosynthesis - Zea mays (maize);	IPR027417;	P-loop containing nucleoside triphosphate hydrolase;
Zm00001d034760_P001	"ferredoxin3 ubiquitous, cDNA clone, gene specific probe, amino acid sequence GN= fdx3"	3.341	Up	0.0047163	chloroplast	K02639	petF; ferredoxin	zma00195 Photosynthesis - Zea mays (maize);	IPR001041; IPR012675;	2Fe-2S ferredoxin-type iron-sulfur binding domain; Beta-grasp domain;
Zm00001d018220_P001	glutathione transferase24 GN= gst24	3.339	Up	0.002076	chloroplast	K00799	GST; glutathione S-transferase [EC:2.5.1.18]	zma00480 Glutathione metabolism - Zea mays (maize);	IPR004046; IPR010987; IPR012336; IPR004045;	Glutathione S-transferase, C-terminal; Glutathione S-transferase, C-terminal-like; Thioredoxin-like fold; Glutathione S-transferase, N-terminal;
Zm00001d000428_P001	Transmembrane 9 superfamily member 9	3.333	Up	0.0037023	chloroplast	K17086			IPR020846;	Major facilitator superfamily domain;
Zm00001d033455_P001	Protein P21	3.331	Up	8.081e-05	extracellular
Zm00001d002898_P001	Peroxidase 12	3.313	Up	0.0040562	vacuolar membrane	K00430	E1.11.1.7; peroxidase [EC:1.11.1.7]	zma00940 Phenylpropanoid biosynthesis - Zea mays (maize); zma01110 Biosynthesis of secondary metabolites - Zea mays (maize); zma01100 Metabolic pathways - Zea mays (maize);	IPR033905; IPR002016;	Secretory peroxidase; Haem peroxidase, plant/fungal/bacterial;
Zm00001d042287_P001	CDC5 protein	3.312	Up	8.0183e-05	nucleus	K12860	CDC5L; pre-mRNA-splicing factor CDC5/CEF1	zma03040 Spliceosome - Zea mays (maize);	IPR001005; IPR021786; IPR009057; IPR017930;	SANT/Myb domain; Pre-mRNA splicing factor component Cdc5p/Cef1; Homeobox domain-like; Myb domain;
Zm00001d011121_P002	Ribosomal RNA processing Brix domain protein	3.307	Up	0.00091625	cytoplasm	K14846			IPR007109; IPR004154;	Brix domain; Anticodon-binding;
Zm00001d040029_P002	uncharacterized protein	3.296	Up	5.7851e-05	mitochondria				IPR000877;	Proteinase inhibitor I12, Bowman-Birk;
Zm00001d011113_P001	Uncharacterised protein family SERF	3.294	Up	0.0041829	chloroplast
Zm00001d006036_P001	Heat shock 70 kDa protein 9 mitochondrial	3.269	Up	3.9191e-05	mitochondria	K04043	dnaK; molecular chaperone DnaK	zma03018 RNA degradation - Zea mays (maize);	IPR029048; IPR029047;	Heat shock protein 70kD, C-terminal domain; Heat shock protein 70kD, peptide-binding domain;
Zm00001d029648_P001	"copalyl diphosphate synthase2 encodes ent-kaurene synthase, a copalyl diphosphate synthase protein having close identity with An1 gene product GN= cpps2"	3.256	Up	0.00031552	chloroplast	K04120	E5.5.1.13; ent-copalyl diphosphate synthase [EC:5.5.1.13]	zma00904 Diterpenoid biosynthesis - Zea mays (maize); zma01110 Biosynthesis of secondary metabolites - Zea mays (maize); zma01100 Metabolic pathways - Zea mays (maize);	IPR005630; IPR008949; IPR008930; IPR001906;	Terpene synthase, metal-binding domain; Isoprenoid synthase domain; Terpenoid cyclases/protein prenyltransferase alpha-alpha toroid; Terpene synthase, N-terminal domain;
Zm00001d000406_P001	Endochitinase EP3	3.253	Up	0.028605	chloroplast	K01183	E3.2.1.14; chitinase [EC:3.2.1.14]	zma00520 Amino sugar and nucleotide sugar metabolism - Zea mays (maize); zma01100 Metabolic pathways - Zea mays (maize);	IPR000726; IPR023346; IPR001002;	Glycoside hydrolase, family 19, catalytic; Lysozyme-like domain; Chitin-binding, type 1;
Zm00001d029969_P001	nucleoside diphosphate kinase1 encodes a G4-binding protein GN= ndpk1	3.249	Up	0.0050234	chloroplast
Zm00001d018966_P001	Acidic endochitinase	3.244	Up	0.0168438	chloroplast	K01183	E3.2.1.14; chitinase [EC:3.2.1.14]	zma00520 Amino sugar and nucleotide sugar metabolism - Zea mays (maize); zma01100 Metabolic pathways - Zea mays (maize);	IPR001223; IPR017853; IPR013781;	Glycoside hydrolase family 18, catalytic domain; Glycoside hydrolase superfamily; Glycoside hydrolase, catalytic domain;
Zm00001d039613_P001	Has 43784 Blast hits to 26928 proteins in 1799 species Archae - 86 GN=BEST Arabidopsis thaliana protein match is: copper ion binding (TAIR:AT4G32610.1)	3.224	Up	0.0117441	nucleus
Zm00001d032531_P001	Membrane steroid-binding protein 1	3.22	Up	0.027239	cytoplasm	K17278			IPR001199;	Cytochrome b5-like heme/steroid binding domain;
Zm00001d051420_P001	dehydrin3 GN= dhn3	3.2	Up	0.00120278	nucleus
Zm00001d034872_P002	nuclear factor Y subunit C10	3.198	Up	0.0029175	nucleus				IPR009072; IPR003958;	Histone-fold; Transcription factor CBF/NF-Y/archaeal histone domain;
Zm00001d032250_P001	uncharacterized protein	3.187	Up	5.8353e-05	plasma membrane
Zm00001d002292_P002	NAD(P)-binding Rossmann-fold superfamily protein	3.167	Up	1.7102e-05	chloroplast	K12448	UXE; UDP-arabinose 4-epimerase [EC:5.1.3.5]	zma00520 Amino sugar and nucleotide sugar metabolism - Zea mays (maize); zma01100 Metabolic pathways - Zea mays (maize);	IPR016040;	NAD(P)-binding domain;
Zm00001d016696_P002	alpha/beta-Hydrolases superfamily protein	3.167	Up	0.0038569	mitochondria				IPR029058; IPR000073;	Alpha/Beta hydrolase fold; Alpha/beta hydrolase fold-1;
Zm00001d022092_P001	Cytosolic sulfotransferase 17	3.162	Up	0.00109979	cytoplasm	K22312			IPR000863; IPR027417;	Sulfotransferase domain; P-loop containing nucleoside triphosphate hydrolase;
Zm00001d008788_P004	Eukaryotic translation initiation factor 3 subunit A	3.16	Up	0.00152125	cytoplasm	K03254	EIF3A; translation initiation factor 3 subunit A	zma03013 RNA transport - Zea mays (maize);	IPR000717;	Proteasome component (PCI) domain;
Zm00001d041480_P001	DEAD-box ATP-dependent RNA helicase 53	3.148	Up	0.0018995	mitochondria				IPR014014; IPR011545; IPR027417; IPR014001; IPR001650;	RNA helicase, DEAD-box type, Q motif; DEAD/DEAH box helicase domain; P-loop containing nucleoside triphosphate hydrolase; Helicase superfamily 1/2, ATP-binding domain; Helicase, C-terminal;
Zm00001d048947_P001	pathogenesis-related protein3 GN= prp3	3.146	Up	1.8482e-05	chloroplast				IPR009009; IPR001153;	RlpA-like protein, double-psi beta-barrel domain; Barwin domain;
Zm00001d044147_P001	cytochrome P450 family 72 subfamily A polypeptide 8	3.131	Up	0.0081751	chloroplast
Zm00001d022457_P001	"peroxidase3 electrophoretic mobility, anodal GN= px3"	3.041	Up	0.0009997	chloroplast	K00430	E1.11.1.7; peroxidase [EC:1.11.1.7]	zma00940 Phenylpropanoid biosynthesis - Zea mays (maize); zma01110 Biosynthesis of secondary metabolites - Zea mays (maize); zma01100 Metabolic pathways - Zea mays (maize);	IPR033905; IPR002016;	Secretory peroxidase; Haem peroxidase, plant/fungal/bacterial;
Zm00001d017029_P007	phosphoinositide binding	3.009	Up	1.82481e-05	nucleus				IPR011990;	Tetratricopeptide-like helical domain;
Zm00001d019060_P001	deoxy xylulose synthase 2 root specific GN= dxs2	2.998	Up	0.00090109	chloroplast	K01662	dxs; 1-deoxy-D-xylulose-5-phosphate synthase [EC:2.2.1.7]	zma00900 Terpenoid backbone biosynthesis - Zea mays (maize); zma00730 Thiamine metabolism - Zea mays (maize); zma01110 Biosynthesis of secondary metabolites - Zea mays (maize); zma01100 Metabolic pathways - Zea mays (maize);	IPR005474; IPR009014; IPR033248; IPR005475; IPR029061;	Transketolase, N-terminal; Transketolase C-terminal/Pyruvate-ferredoxin oxidoreductase domain II; Transketolase, C-terminal domain; Transketolase-like, pyrimidine-binding domain; Thiamin diphosphate-binding fold;
Zm00001d008691_P004	Autophagy-related protein 18c	2.987	Up	0.041537	nucleus	K22991			IPR017986; IPR015943;	WD40-repeat-containing domain; WD40/YVTN repeat-like-containing domain;
Zm00001d016440_P001	DNAJ heat shock family protein	2.952	Up	0.0080393	cytoplasm	K09510			IPR008971; IPR002939; IPR001623;	HSP40/DnaJ peptide-binding; Chaperone DnaJ, C-terminal; DnaJ domain;
Zm00001d037689_P001	hexokinase7 GN= hex7	2.947	Up	0.00184393	cytoplasm	K00844	HK; hexokinase [EC:2.7.1.1]	zma00052 Galactose metabolism - Zea mays (maize); zma00010 Glycolysis / Gluconeogenesis - Zea mays (maize); zma01200 Carbon metabolism - Zea mays (maize); zma00500 Starch and sucrose metabolism - Zea mays (maize); zma00520 Amino sugar and nucleotide sugar metabolism - Zea mays (maize); zma01110 Biosynthesis of secondary metabolites - Zea mays (maize); zma01100 Metabolic pathways - Zea mays (maize…	IPR022672; IPR022673;	Hexokinase, N-terminal; Hexokinase, C-terminal;
Zm00001d053001_P001	Eukaryotic aspartyl protease family protein	2.945	Up	0.00195845	chloroplast				IPR032799; IPR033121; IPR021109; IPR032861; IPR034161;	Xylanase inhibitor, C-terminal; Peptidase family A1 domain; Aspartic peptidase domain; Xylanase inhibitor, N-terminal; Pepsin-like domain, plant;
Zm00001d043795_P001	Glutathione S-transferase GSTU6	2.944	Up	0.0020974	vacuolar membrane	K00799	GST; glutathione S-transferase [EC:2.5.1.18]	zma00480 Glutathione metabolism - Zea mays (maize);	IPR010987; IPR004045; IPR012336;	Glutathione S-transferase, C-terminal-like; Glutathione S-transferase, N-terminal; Thioredoxin-like fold;
Zm00001d014121_P001	Ent-cassadiene C2-hydroxylase	2.943	Up	0.00164233	chloroplast
Zm00001d042275_P001	Phosphatidylinositol transfer protein CSR1	2.936	Up	0.031485	cytoplasm				IPR001251; IPR011074;	CRAL-TRIO lipid binding domain; CRAL/TRIO, N-terminal domain;
Zm00001d041072_P001	ABC transporter F family member 1	2.934	Up	0.040197	chloroplast	K06185			IPR032781; IPR003593; IPR003439; IPR027417;	ABC-transporter extension domain; AAA+ ATPase domain; ABC transporter-like; P-loop containing nucleoside triphosphate hydrolase;
Zm00001d026609_P002	uncharacterized protein	2.921	Up	0.046098	chloroplast
Zm00001d007753_P001	Eukaryotic aspartyl protease family protein	2.905	Up	7.675e-05	chloroplast				IPR032799; IPR021109; IPR032861;	Xylanase inhibitor, C-terminal; Aspartic peptidase domain; Xylanase inhibitor, N-terminal;
Zm00001d041568_P001	60S ribosomal protein L2	2.891	Up	0.00041612	cytoplasm	K02938	RP-L8e; large subunit ribosomal protein L8e	zma03010 Ribosome - Zea mays (maize);	IPR008991; IPR012340; IPR022669; IPR022666; IPR014726; IPR014722;	Translation protein SH3-like domain; Nucleic acid-binding, OB-fold; Ribosomal protein L2, C-terminal; Ribosomal Proteins L2, RNA binding domain; Ribosomal protein L2, domain 3; Ribosomal protein L2 domain 2;
Zm00001d034590_P002	Mitochondrial Rho GTPase 1	2.888	Up	0.0068987	chloroplast	K07870			IPR013566; IPR011992; IPR027417; IPR002048; IPR013567; IPR020860;	EF hand associated, type-1; EF-hand domain pair; P-loop containing nucleoside triphosphate hydrolase; EF-hand domain; EF hand associated, type-2; MIRO domain;
Zm00001d042022_P001	Peroxidase 12	2.884	Up	9.9307e-07	chloroplast	K00430	E1.11.1.7; peroxidase [EC:1.11.1.7]	zma00940 Phenylpropanoid biosynthesis - Zea mays (maize); zma01110 Biosynthesis of secondary metabolites - Zea mays (maize); zma01100 Metabolic pathways - Zea mays (maize);	IPR033905; IPR002016;	Secretory peroxidase; Haem peroxidase, plant/fungal/bacterial;
Zm00001d040027_P002	uncharacterized protein	2.871	Up	0.000103031	extracellular				IPR000877;	Proteinase inhibitor I12, Bowman-Birk;
Zm00001d029814_P001	Xyloglucan endotransglucosylase/hydrolase protein 32	2.865	Up	0.0196814	chloroplast	K08235			IPR010713; IPR013320; IPR000757;	Xyloglucan endo-transglycosylase, C-terminal; Concanavalin A-like lectin/glucanase domain; Glycoside hydrolase family 16;
Zm00001d002325_P001	uncharacterized protein	2.86	Up	0.002279	Golgi apparatus	K20283
Zm00001d044662_P001	ZHD9 ZF-HD type transcription factor	2.859	Up	0.020142	chloroplast				IPR006456;	ZF-HD homeobox protein, Cys/His-rich dimerisation domain;
Zm00001d013375_P006	Lariat debranching enzyme	2.855	Up	0.00067521	cytoplasm	K18328			IPR029052; IPR004843;	Metallo-dependent phosphatase-like; Calcineurin-like phosphoesterase domain, ApaH type;
Zm00001d043335_P007	Branched-chain-amino-acid aminotransferase 5 chloroplastic	2.852	Up	0.032904	cytoplasm
Zm00001d013522_P001	14-dihydroxy-2-naphthoyl-CoA thioesterase 1	2.851	Up	0.0098625	cytoplasm	K19222	menI; 1,4-dihydroxy-2-naphthoyl-CoA hydrolase [EC:3.1.2.28]	zma01110 Biosynthesis of secondary metabolites - Zea mays (maize); zma01100 Metabolic pathways - Zea mays (maize); zma00130 Ubiquinone and other terpenoid-quinone biosynthesis - Zea mays (maize);	IPR006683; IPR003736; IPR029069;	Thioesterase domain; Phenylacetic acid degradation-related domain; HotDog domain;
Zm00001d020292_P001	MND1-interacting protein 1	2.848	Up	0.02134	nucleus				IPR013083;	Zinc finger, RING/FYVE/PHD-type;
Zm00001d043988_P001	"chitinase chem5 cDNA derived from a library originating from a mercuric chloride treated line, INRA258 GN= chn1"	2.826	Up	3.5003e-05	extracellular	K01183	E3.2.1.14; chitinase [EC:3.2.1.14]	zma00520 Amino sugar and nucleotide sugar metabolism - Zea mays (maize); zma01100 Metabolic pathways - Zea mays (maize);	IPR001223; IPR017853; IPR013781;	Glycoside hydrolase family 18, catalytic domain; Glycoside hydrolase superfamily; Glycoside hydrolase, catalytic domain;
Zm00001d020702_P001	Mitochondrial phosphate carrier protein 2 mitochondrial	2.823	Up	0.00070181	chloroplast	K15102			IPR023395;	Mitochondrial carrier domain;
Zm00001d006041_P038	Proton pump-interactor 1	2.81	Up	9.5409e-05	nucleus
Zm00001d009960_P001	HXXXD-type acyl-transferase family protein	2.806	Up	0.048799	cytoplasm				IPR023213;	Chloramphenicol acetyltransferase-like domain;
Zm00001d016402_P041	Coatomer subunit beta'-3	2.803	Up	0.043656	nucleus	K17302			IPR006692; IPR011990; IPR017986; IPR015943;	Coatomer, WD associated region; Tetratricopeptide-like helical domain; WD40-repeat-containing domain; WD40/YVTN repeat-like-containing domain;
Zm00001d009084_P001	S-adenosyl-L-methionine-dependent methyltransferases superfamily protein	2.801	Up	1.912e-06	mitochondria				IPR029063; IPR013216;	S-adenosyl-L-methionine-dependent methyltransferase; Methyltransferase type 11;
Zm00001d029435_P001	Transducin/WD40 repeat-like superfamily protein	2.792	Up	0.0022436	nucleus	K12816	CDC40; pre-mRNA-processing factor 17	zma03040 Spliceosome - Zea mays (maize);	IPR017986; IPR015943;	WD40-repeat-containing domain; WD40/YVTN repeat-like-containing domain;
Zm00001d035915_P001	Proteasome subunit beta type	2.791	Up	0.000137884	chloroplast	K02739	PSMB7; 20S proteasome subunit beta 2 [EC:3.4.25.1]	zma03050 Proteasome - Zea mays (maize);	IPR029055;	Nucleophile aminohydrolases, N-terminal;
Zm00001d048424_P017	evolutionarily conserved C-terminal region 2	2.789	Up	0.0083402	nucleus				IPR007275;	YTH domain;
Zm00001d006010_P001	uncharacterized protein	2.775	Up	0.0129836	nucleus
Zm00001d016285_P001	Protein kinase family protein with leucine-rich repeat domain	2.772	Up	0.0075788	plasma membrane				IPR000719; IPR013210; IPR032675; IPR013320; IPR011009;	Protein kinase domain; Leucine-rich repeat-containing N-terminal, plant-type; Leucine-rich repeat domain, L domain-like; Concanavalin A-like lectin/glucanase domain; Protein kinase-like domain;
Zm00001d029744_P001	flavone synthase typeI1 Encodes a flavone synthase that is of the soluble Fe2+/2- oxoglutarate-dependent dioxygenase class GN= fnsi1	2.766	Up	5.7852e-05	cytoplasm				IPR027443; IPR005123; IPR026992;	Isopenicillin N synthase-like; Oxoglutarate/iron-dependent dioxygenase; Non-haem dioxygenase N-terminal domain;
Zm00001d038874_P002	Probable polygalacturonase	2.744	Up	0.000196657	chloroplast				IPR011050; IPR012334;	Pectin lyase fold/virulence factor; Pectin lyase fold;
Zm00001d041495_P004	SRP40 carboxy-terminal domain protein	2.74	Up	0.0025753	chloroplast				IPR006594; IPR007718;	LIS1 homology motif; SRP40, C-terminal;
Zm00001d051693_P001	Aspartyl protease AED1	2.739	Up	0.004863	nucleus				IPR032799; IPR033121; IPR021109; IPR032861;	Xylanase inhibitor, C-terminal; Peptidase family A1 domain; Aspartic peptidase domain; Xylanase inhibitor, N-terminal;
Zm00001d045072_P023	uncharacterized protein	2.736	Up	0.00159701	nucleus
Zm00001d017197_P011	EXPRESSED IN 24 plant structures GN=LOCATED IN: cytosol chloroplast	2.731	Up	0.026459	nucleus
Zm00001d051187_P004	ADP-ribosylation factor GTPase-activating protein AGD2	2.727	Up	8.3167e-05	chloroplast	K12489	ACAP; Arf-GAP with coiled-coil, ANK repeat and PH domain-containing protein	zma04144 Endocytosis - Zea mays (maize);	IPR027267; IPR011993; IPR004148; IPR001849;	Arfaptin homology (AH) domain/BAR domain; PH domain-like; BAR domain; Pleckstrin homology domain;
Zm00001d043052_P007	Endoplasmic reticulum vesicle transporter protein	2.685	Up	0.023635	cytoplasm				IPR012936;	Endoplasmic reticulum vesicle transporter, C-terminal;
Zm00001d033623_P002	Lipoxygenase	2.684	Up	6.2805e-07	cytoplasm	K15718	LOX1_5; linoleate 9S-lipoxygenase [EC:1.13.11.58]	zma00591 Linoleic acid metabolism - Zea mays (maize);	IPR027433; IPR001024; IPR013819;	Lipoxygenase, domain 3; PLAT/LH2 domain; Lipoxygenase, C-terminal;
Zm00001d040988_P001	RNA-dependent RNA polymerase6 mutant seedlings with reduced fully abaxialized organs that arrest shortly after germination GN= rdr6	2.681	Up	0.000100079	chloroplast	K11699
Zm00001d049127_P001	Putative serine/threonine protein phosphatase superfamily protein	2.68	Up	0.00073975	cytoplasm				IPR029052; IPR004843;	Metallo-dependent phosphatase-like; Calcineurin-like phosphoesterase domain, ApaH type;
Zm00001d017547_P001	Dehydrin COR410	2.679	Up	0.00021678	nucleus
Zm00001d019256_P001	UDP-glycosyltransferase 76C1	2.676	Up	0.00101511	cytoplasm
Zm00001d017139_P002	hydroxymethylbutenyl diphosphate synthase1 GN= hds1	2.667	Up	5.4049e-07	chloroplast	K03526	gcpE; (E)-4-hydroxy-3-methylbut-2-enyl-diphosphate synthase [EC:1.17.7.1 1.17.7.3]	zma00900 Terpenoid backbone biosynthesis - Zea mays (maize); zma01110 Biosynthesis of secondary metabolites - Zea mays (maize); zma01100 Metabolic pathways - Zea mays (maize);
Zm00001d015798_P001	Subtilisin-like protease SBT5.3	2.666	Up	0.00073898	chloroplast				IPR003137; IPR034197; IPR000209; IPR010259;	PA domain; Cucumisin-like catalytic domain; Peptidase S8/S53 domain; Peptidase S8 propeptide/proteinase inhibitor I9;
Zm00001d038764_P001	UDP-glycosyltransferase 88A1	2.663	Up	6.2813e-05	chloroplast	K22845	PGT1; phlorizin synthase [EC:2.4.1.357]	zma01110 Biosynthesis of secondary metabolites - Zea mays (maize); zma00941 Flavonoid biosynthesis - Zea mays (maize);
Zm00001d036878_P003	Protein WVD2-like 5	2.662	Up	0.0146013	nucleus				IPR027329;	TPX2, C-terminal;
Zm00001d016708_P002	Beta-fructofuranosidase%2C cell wall isozyme	2.66	Up	6.1278e-05	chloroplast	K01193	INV; beta-fructofuranosidase [EC:3.2.1.26]	zma00052 Galactose metabolism - Zea mays (maize); zma00500 Starch and sucrose metabolism - Zea mays (maize); zma01100 Metabolic pathways - Zea mays (maize);	IPR013148; IPR023296; IPR013189; IPR013320;	Glycosyl hydrolase family 32, N-terminal; Glycosyl hydrolase, five-bladed beta-propellor domain; Glycosyl hydrolase family 32, C-terminal; Concanavalin A-like lectin/glucanase domain;
Zm00001d047111_P001	extensin-like protein	2.66	Up	0.000181594	extracellular				IPR016140; IPR027923;	Bifunctional inhibitor/plant lipid transfer protein/seed storage helical domain; Hydrophobic seed protein;
Zm00001d018965_P001	Xylanase inhibitor protein 1	2.654	Up	6.3968e-05	chloroplast	K01183	E3.2.1.14; chitinase [EC:3.2.1.14]	zma00520 Amino sugar and nucleotide sugar metabolism - Zea mays (maize); zma01100 Metabolic pathways - Zea mays (maize);	IPR017853; IPR013781;	Glycoside hydrolase superfamily; Glycoside hydrolase, catalytic domain;
Zm00001d038703_P001	O-methyltransferase ZRP4	2.631	Up	0.0002592	cytoplasm				IPR011991; IPR012967; IPR029063; IPR001077;	Winged helix-turn-helix DNA-binding domain; Plant methyltransferase dimerisation; S-adenosyl-L-methionine-dependent methyltransferase; O-methyltransferase, family 2;
Zm00001d040599_P001	Quinolinate synthase chloroplastic	2.63	Up	0.00021871	cytoplasm	K03517	nadA; quinolinate synthase [EC:2.5.1.72]	zma01100 Metabolic pathways - Zea mays (maize); zma00760 Nicotinate and nicotinamide metabolism - Zea mays (maize);
Zm00001d018798_P006	IAP-like protein 1	2.629	Up	0.00116279	nucleus				IPR012935;	Zinc finger, C3HC-like;
Zm00001d031300_P003	Probable galactinol--sucrose galactosyltransferase 1	2.615	Up	0.00173809	chloroplast	K06617	E2.4.1.82; raffinose synthase [EC:2.4.1.82]	zma00052 Galactose metabolism - Zea mays (maize);	IPR013785; IPR017853;	Aldolase-type TIM barrel; Glycoside hydrolase superfamily;
Zm00001d010727_P001	BAG family molecular chaperone regulator 8 chloroplastic	2.605	Up	0.00155774	chloroplast				IPR003103;	BAG domain;
Zm00001d039106_P004	40S ribosomal protein S12	2.586	Up	7.7932e-05	chloroplast	K02951	RP-S12e; small subunit ribosomal protein S12e	zma03010 Ribosome - Zea mays (maize);	IPR029064; IPR004038;	50S ribosomal protein L30e-like; Ribosomal protein L7Ae/L30e/S12e/Gadd45;
Zm00001d006336_P001	uncharacterized protein	2.579	Up	0.000155384	mitochondria
Zm00001d028693_P004	safener induced1 GN= saf1	2.578	Up	5.6962e-05	mitochondria	K00799	GST; glutathione S-transferase [EC:2.5.1.18]	zma00480 Glutathione metabolism - Zea mays (maize);	IPR010987; IPR004045; IPR012336;	Glutathione S-transferase, C-terminal-like; Glutathione S-transferase, N-terminal; Thioredoxin-like fold;
Zm00001d040163_P002	deoxy xylulose reductoisomerase1 enzyme catalyzes the first committed step of the plastidial pathway to apocarotenoids during mycorrhizal establishment GN= dxr1	2.577	Up	0.0005168	cytoplasm	K00099	dxr; 1-deoxy-D-xylulose-5-phosphate reductoisomerase [EC:1.1.1.267]	zma00900 Terpenoid backbone biosynthesis - Zea mays (maize); zma01110 Biosynthesis of secondary metabolites - Zea mays (maize); zma01100 Metabolic pathways - Zea mays (maize);	IPR013512; IPR016040; IPR013644; IPR026877;	1-deoxy-D-xylulose 5-phosphate reductoisomerase, N-terminal; NAD(P)-binding domain; 1-deoxy-D-xylulose 5-phosphate reductoisomerase, C-terminal; DXP reductoisomerase C-terminal domain;
Zm00001d006596_P001	Elongation factor 1-alpha 2	2.573	Up	0.0026587	cytoplasm	K03231	EEF1A; elongation factor 1-alpha	zma03013 RNA transport - Zea mays (maize);	IPR004160; IPR004161; IPR009001; IPR027417; IPR000795; IPR009000;	Translation elongation factor EFTu/EF1A, C-terminal; Translation elongation factor EFTu-like, domain 2; Translation elongation factor EF1A/initiation factor IF2gamma, C-terminal; P-loop containing nucleoside triphosphate hydrolase; Transcription factor, GTP-binding domain; Translation protein, beta-barrel domain;
Zm00001d047638_P001	Calcium-dependent phosphotriesterase superfamily protein	2.571	Up	1.74746e-05	cytoplasm				IPR011042;	Six-bladed beta-propeller, TolB-like;
Zm00001d026254_P001	60S ribosomal protein L7-2	2.564	Up	0.000461	cytoplasm	K02937	RP-L7e; large subunit ribosomal protein L7e	zma03010 Ribosome - Zea mays (maize);	IPR012988; IPR016082;	Ribosomal protein L30, N-terminal; Ribosomal protein L30, ferredoxin-like fold domain;
Zm00001d002334_P001	AICARFT/IMPCHase bienzyme family protein	2.562	Up	0.00040315	chloroplast	K00602	purH; phosphoribosylaminoimidazolecarboxamide formyltransferase / IMP cyclohydrolase [EC:2.1.2.3 3.5.4.10]	zma01110 Biosynthesis of secondary metabolites - Zea mays (maize); zma01100 Metabolic pathways - Zea mays (maize); zma00670 One carbon pool by folate - Zea mays (maize); zma00230 Purine metabolism - Zea mays (maize);	IPR016193; IPR024051; IPR011607;	Cytidine deaminase-like; AICAR transformylase domain; Methylglyoxal synthase-like domain;
Zm00001d009749_P019	eukaryotic translation initiation factor 2 (eIF-2) family protein	2.558	Up	0.0050431	cytoplasm	K03243	EIF5B; translation initiation factor 5B	zma03013 RNA transport - Zea mays (maize);	IPR023115; IPR005225; IPR004161; IPR011989; IPR027417; IPR000795; IPR009000;	Translation initiation factor IF- 2, domain 3; Small GTP-binding protein domain; Translation elongation factor EFTu-like, domain 2; Armadillo-like helical; P-loop containing nucleoside triphosphate hydrolase; Transcription factor, GTP-binding domain; Translation protein, beta-barrel domain;
Zm00001d033648_P001	Organic anion transporter	2.552	Up	0.038977	chloroplast				IPR004853;	Sugar phosphate transporter domain;
Zm00001d053887_P001	Molybdopterin synthase catalytic subunit	2.552	Up	0.022316	cytoplasm	K03635	MOCS2B; molybdopterin synthase catalytic subunit [EC:2.8.1.12]	zma00790 Folate biosynthesis - Zea mays (maize); zma01100 Metabolic pathways - Zea mays (maize); zma04122 Sulfur relay system - Zea mays (maize);
Zm00001d011418_P004	cytochrome P450 family 72 subfamily A polypeptide 8	2.55	Up	0.042756	chloroplast
Zm00001d008795_P001	UDP-glycosyltransferase 74B1	2.541	Up	0.027584	chloroplast
Zm00001d013610_P001	Osmotin-like protein OSM34	2.539	Up	0.0076845	chloroplast
Zm00001d049095_P004	EMB2756 (EMBRYO DEFECTIVE 2756)	2.535	Up	0.029177	nucleus
Zm00001d012254_P003	Putative patellin family protein	2.534	Up	0.043021	nucleus				IPR001251; IPR009038; IPR011074;	CRAL-TRIO lipid binding domain; GOLD domain; CRAL/TRIO, N-terminal domain;
Zm00001d025998_P001	Ubiquitin carboxyl-terminal hydrolase 3	2.533	Up	0.037082	chloroplast	K05609			IPR001578;	Peptidase C12, ubiquitin carboxyl-terminal hydrolase;
Zm00001d045340_P003	Pyridoxal-5'-phosphate-dependent enzyme family protein	2.532	Up	0.0040185	cytoplasm	K01738	cysK; cysteine synthase [EC:2.5.1.47]	zma01230 Biosynthesis of amino acids - Zea mays (maize); zma01200 Carbon metabolism - Zea mays (maize); zma00920 Sulfur metabolism - Zea mays (maize); zma01110 Biosynthesis of secondary metabolites - Zea mays (maize); zma01100 Metabolic pathways - Zea mays (maize); zma00270 Cysteine and methionine metabolism - Zea mays (maize);	IPR001926;	Tryptophan synthase beta subunit-like PLP-dependent enzyme;
Zm00001d044947_P001	triacylglycerol lipase-like 1	2.531	Up	0.00190162	chloroplast				IPR002921; IPR029058;	Fungal lipase-like domain; Alpha/Beta hydrolase fold;
Zm00001d025981_P021	RNA-binding (RRM/RBD/RNP motifs) family protein	2.522	Up	0.0090836	nucleus
Zm00001d043674_P001	Cytidine deaminase	2.521	Up	0.00124422	cytoplasm	K01489	cdd; cytidine deaminase [EC:3.5.4.5]	zma00240 Pyrimidine metabolism - Zea mays (maize); zma01100 Metabolic pathways - Zea mays (maize);	IPR016193; IPR002125; IPR005735; IPR013171;	Cytidine deaminase-like; Cytidine and deoxycytidylate deaminases, zinc-binding; Zinc finger, LSD1-type; Cytidine/deoxycytidylate deaminase, zinc-binding domain;
Zm00001d038023_P001	Putative WRKY DNA-binding domain superfamily protein	2.521	Up	0.003041	nucleus	K13424	WRKY33; WRKY transcription factor 33	zma04626 Plant-pathogen interaction - Zea mays (maize); zma04016 MAPK signaling pathway - plant - Zea mays (maize);	IPR003657;	WRKY domain;
Zm00001d003015_P001	phenylalanine ammonia lyase6 GN= pal6	2.518	Up	4.2209e-05	chloroplast	K10775	PAL; phenylalanine ammonia-lyase [EC:4.3.1.24]	zma00940 Phenylpropanoid biosynthesis - Zea mays (maize); zma01110 Biosynthesis of secondary metabolites - Zea mays (maize); zma01100 Metabolic pathways - Zea mays (maize); zma00360 Phenylalanine metabolism - Zea mays (maize);	IPR024083; IPR008948; IPR023144;	Fumarase/histidase, N-terminal; L-Aspartase-like; Phenylalanine ammonia-lyase, shielding domain;
Zm00001d046342_P001	kaurene oxidase2 GN= ko2	2.507	Up	0.0067987	endoplasmic reticulum	K04122	GA3; ent-kaurene oxidase [EC:1.14.14.86]	zma00904 Diterpenoid biosynthesis - Zea mays (maize); zma01110 Biosynthesis of secondary metabolites - Zea mays (maize); zma01100 Metabolic pathways - Zea mays (maize);
Zm00001d012911_P003	Huntingtin interacting protein K	2.506	Up	0.00094135	cytoplasm
Zm00001d042140_P001	Beta-1%2C3-glucanase	2.504	Up	2.0139e-06	chloroplast				IPR017853; IPR013781;	Glycoside hydrolase superfamily; Glycoside hydrolase, catalytic domain;
Zm00001d018112_P008	Polyadenylate-binding protein 3	2.502	Up	0.031021	cytoplasm	K14396	PABPN1; polyadenylate-binding protein 2	zma03015 mRNA surveillance pathway - Zea mays (maize);	IPR000504; IPR012677;	RNA recognition motif domain; Nucleotide-binding alpha-beta plait domain;
Zm00001d021647_P005	ABC transporter G family member 34	2.496	Up	0.00152306	plasma membrane				IPR003593; IPR003439; IPR027417; IPR034003; IPR013581; IPR013525;	AAA+ ATPase domain; ABC transporter-like; P-loop containing nucleoside triphosphate hydrolase; ATP-binding cassette transporter, PDR-like subfamily G, domain 2; Plant PDR ABC transporter associated; ABC-2 type transporter;
Zm00001d037962_P007	malic enzyme5 GN= me5	2.485	Up	0.026202	chloroplast	K00029	E1.1.1.40; malate dehydrogenase (oxaloacetate-decarboxylating)(NADP+) [EC:1.1.1.40]	zma01200 Carbon metabolism - Zea mays (maize); zma01100 Metabolic pathways - Zea mays (maize); zma00710 Carbon fixation in photosynthetic organisms - Zea mays (maize); zma00620 Pyruvate metabolism - Zea mays (maize);	IPR012302; IPR012301; IPR016040;	Malic enzyme, NAD-binding; Malic enzyme, N-terminal domain; NAD(P)-binding domain;
Zm00001d002338_P001	UDP-N-acetylglucosamine diphosphorylase 2	2.477	Up	2.1469e-05	chloroplast	K00972	UAP1; UDP-N-acetylglucosamine/UDP-N-acetylgalactosamine diphosphorylase [EC:2.7.7.23 2.7.7.83]	zma00520 Amino sugar and nucleotide sugar metabolism - Zea mays (maize); zma01100 Metabolic pathways - Zea mays (maize);	IPR029044;	Nucleotide-diphospho-sugar transferases;
Zm00001d018979_P003	40S ribosomal protein S15-4	2.475	Up	0.00146089	cytoplasm	K02958	RP-S15e; small subunit ribosomal protein S15e	zma03010 Ribosome - Zea mays (maize);	IPR023575;	Ribosomal protein S19, superfamily;
Zm00001d046369_P002	Serine/threonine-protein phosphatase	2.472	Up	0.0134016	cytoplasm	K04382	PPP2C; serine/threonine-protein phosphatase 2A catalytic subunit [EC:3.1.3.16]	zma03015 mRNA surveillance pathway - Zea mays (maize); zma04136 Autophagy - other - Zea mays (maize);	IPR029052; IPR004843; IPR006186;	Metallo-dependent phosphatase-like; Calcineurin-like phosphoesterase domain, ApaH type; Serine/threonine-specific protein phosphatase/bis(5-nucleosyl)-tetraphosphatase;
Zm00001d007369_P021	Serine--tRNA ligase cytoplasmic	2.464	Up	6.1798e-05	cytoplasm	K01875	SARS; seryl-tRNA synthetase [EC:6.1.1.11]	zma00970 Aminoacyl-tRNA biosynthesis - Zea mays (maize);	IPR010978; IPR002314; IPR015866; IPR006195; IPR033729;	tRNA-binding arm; Aminoacyl-tRNA synthetase, class II (G/ P/ S/T); Serine-tRNA synthetase, type1, N-terminal; Aminoacyl-tRNA synthetase, class II; Serine-tRNA ligase catalytic core domain;
Zm00001d013830_P001	cytochrome P450 family 76 subfamily C polypeptide 7	2.461	Up	0.00099597	chloroplast
Zm00001d038380_P004	Ras-related protein RABE1c	2.453	Up	0.0059205	cytoplasm	K07901	RAB8A; Ras-related protein Rab-8A	zma04144 Endocytosis - Zea mays (maize);	IPR005225; IPR027417;	Small GTP-binding protein domain; P-loop containing nucleoside triphosphate hydrolase;
Zm00001d016130_P002	GDSL esterase/lipase	2.445	Up	0.00162116	extracellular				IPR001087; IPR013830;	GDSL lipase/esterase; SGNH hydrolase-type esterase domain;
Zm00001d050121_P001	uncharacterized protein	2.436	Up	0.042183	chloroplast
Zm00001d014280_P003	RNA-binding (RRM/RBD/RNP motifs) family protein	2.421	Up	0.0057225	nucleus
Zm00001d009888_P001	DNA primase	2.416	Up	0.0128796	nucleus	K02684	PRI1; DNA primase small subunit [EC:2.7.7.-]	zma00240 Pyrimidine metabolism - Zea mays (maize); zma01100 Metabolic pathways - Zea mays (maize); zma00230 Purine metabolism - Zea mays (maize); zma03030 DNA replication - Zea mays (maize);
Zm00001d023788_P002	Lysine-specific demethylase REF6	2.415	Up	0.0034425	nucleus				IPR015880; IPR007087; IPR013087;	Zinc finger, C2H2-like; Zinc finger, C2H2; Zinc finger C2H2-type/integrase DNA-binding domain;
Zm00001d025132_P001	Nucleic acid-binding OB-fold-like protein	2.415	Up	0.00199782	nucleus	K03236	EIF1A; translation initiation factor 1A	zma03013 RNA transport - Zea mays (maize);	IPR012340; IPR006196;	Nucleic acid-binding, OB-fold; RNA-binding domain, S1, IF1 type;
Zm00001d050164_P001	Wall-associated receptor kinase-like 20	2.414	Up	0.0012759	chloroplast				IPR000719; IPR025287; IPR013320; IPR011009;	Protein kinase domain; Wall-associated receptor kinase, galacturonan-binding domain; Concanavalin A-like lectin/glucanase domain; Protein kinase-like domain;
Zm00001d050837_P001	Gibberellin receptor GID1L2	2.408	Up	0.0091641	cytoplasm				IPR029058; IPR013094;	Alpha/Beta hydrolase fold; Alpha/beta hydrolase fold-3;
Zm00001d043182_P002	cytidine methyl kinase1 encodes 4-(cytidine 5'-diphospho)-2-C-methyl-D-erythritol kinase [a.k.a. 4-diphosphocytidyl-2-C-methyl-D-erythritol kinase] GN= cmk1	2.397	Up	0.0095645	chloroplast	K00919	ispE; 4-diphosphocytidyl-2-C-methyl-D-erythritol kinase [EC:2.7.1.148]	zma00900 Terpenoid backbone biosynthesis - Zea mays (maize); zma01110 Biosynthesis of secondary metabolites - Zea mays (maize); zma01100 Metabolic pathways - Zea mays (maize);	IPR020568; IPR006204; IPR014721;	Ribosomal protein S5 domain 2-type fold; GHMP kinase N-terminal domain; Ribosomal protein S5 domain 2-type fold, subgroup;
Zm00001d031778_P001	Carbonic anhydrase	2.394	Up	0.045359	chloroplast	K01674	cah; carbonic anhydrase [EC:4.2.1.1]	zma00910 Nitrogen metabolism - Zea mays (maize);	IPR001148;	Alpha carbonic anhydrase;
Zm00001d015138_P004	uncharacterized protein	2.38	Up	0.0010991	nucleus
Zm00001d004807_P001	Coatomer subunit beta-1	2.374	Up	0.00048315	endoplasmic reticulum	K17301			IPR011710; IPR011989; IPR029446; IPR016024; IPR002553;	Coatomer beta subunit, C-terminal; Armadillo-like helical; Coatomer beta subunit, appendage platform domain; Armadillo-type fold; Clathrin/coatomer adaptor, adaptin-like, N-terminal;
Zm00001d003730_P002	Histone H3.2	2.374	Up	4.4263e-05	nucleus	K11253			IPR009072; IPR007125;	Histone-fold; Histone H2A/H2B/H3;
Zm00001d050218_P001	NADPH--cytochrome P450 reductase	2.356	Up	2.2557e-05	chloroplast	K00327			IPR017927; IPR008254; IPR029039; IPR001433; IPR017938; IPR003097; IPR023173; IPR001709;	Ferredoxin reductase-type FAD-binding domain; Flavodoxin/nitric oxide synthase; Flavoprotein-like domain; Oxidoreductase FAD/NAD(P)-binding; Riboflavin synthase-like beta-barrel; FAD-binding, type 1; NADPH-cytochrome p450 reductase, FAD-binding, alpha-helical domain-3; Flavoprotein pyridine nucleotide cytochrome reductase;
Zm00001d027731_P011	evolutionarily conserved C-terminal region 2	2.351	Up	2.2689e-05	nucleus				IPR007275;	YTH domain;
Zm00001d035046_P001	Non-lysosomal glucosylceramidase	2.35	Up	1.2491e-07	nucleus	K17108	GBA2; non-lysosomal glucosylceramidase [EC:3.2.1.45]	zma01100 Metabolic pathways - Zea mays (maize); zma00511 Other glycan degradation - Zea mays (maize); zma00600 Sphingolipid metabolism - Zea mays (maize);	IPR012341; IPR024462; IPR006775; IPR008928;	Six-hairpin glycosidase; Glycosyl-hydrolase family 116, N-terminal; Glycosyl-hydrolase family 116, catalytic region; Six-hairpin glycosidase-like;
Zm00001d050112_P008	Putative DUF1296 domain containing family protein	2.348	Up	0.0062389	nucleus				IPR009060;	UBA-like;
Zm00001d021577_P001	UDP-glycosyltransferase 71B1	2.341	Up	0.0038844	endoplasmic reticulum
Zm00001d002244_P006	Polyadenylate-binding protein RBP45C	2.339	Up	0.041797	chloroplast				IPR000504; IPR012677;	RNA recognition motif domain; Nucleotide-binding alpha-beta plait domain;
Zm00001d041914_P003	Putative endonuclease or glycosyl hydrolase	2.331	Up	0.03192	chloroplast				IPR021139; IPR025605; IPR029060;	NYN domain, limkain-b1-type; OST-HTH/LOTUS domain; PIN domain-like;
Zm00001d024885_P001	Putative WD40-like beta propeller repeat family protein	2.322	Up	2.0841e-05	chloroplast				IPR011042;	Six-bladed beta-propeller, TolB-like;
Zm00001d012284_P001	uncharacterized protein	2.317	Up	0.04466	nucleus
Zm00001d018461_P001	Thioredoxin	2.316	Up	0.0003206	cytoplasm	K22762			IPR008580;	PPPDE putative peptidase domain;
Zm00001d022277_P001	tolB protein-related	2.308	Up	7.5734e-05	cytoplasm				IPR015943;	WD40/YVTN repeat-like-containing domain;
Zm00001d028012_P001	Ras-related protein Rab-6A	2.304	Up	0.006404	chloroplast	K07893			IPR027417; IPR013684;	P-loop containing nucleoside triphosphate hydrolase; Mitochondrial Rho-like;
Zm00001d030357_P002	Ubiquitin carboxyl-terminal hydrolase 10	2.304	Up	0.0039421	nucleus				IPR006615; IPR028889; IPR001394;	Peptidase C19, ubiquitin-specific peptidase, DUSP domain; Ubiquitin specific protease domain; Peptidase C19, ubiquitin carboxyl-terminal hydrolase;
Zm00001d040617_P003	60S ribosomal protein L29	2.3	Up	1.86422e-05	nucleus	K02905	RP-L29e; large subunit ribosomal protein L29e	zma03010 Ribosome - Zea mays (maize);
Zm00001d028651_P001	?? cDNA clone pZmL1032 (cultivar Berkeley Fast) hybridizes to mRNA with very late anaerobic accumulation GN= wusl1032	2.298	Up	0.00110359	chloroplast				IPR002902;	Gnk2-homologous domain;
Zm00001d033480_P002	5-methyltetrahydropteroyltriglutamate--homocysteine methyltransferase	2.297	Up	0.00124463	cytoplasm	K00549	metE; 5-methyltetrahydropteroyltriglutamate--homocysteine methyltransferase [EC:2.1.1.14]	zma01230 Biosynthesis of amino acids - Zea mays (maize); zma01110 Biosynthesis of secondary metabolites - Zea mays (maize); zma01100 Metabolic pathways - Zea mays (maize); zma00450 Selenocompound metabolism - Zea mays (maize); zma00270 Cysteine and methionine metabolism - Zea mays (maize);	IPR013215; IPR002629;	Cobalamin-independent methionine synthase MetE, N-terminal; Cobalamin-independent methionine synthase MetE, C-terminal/archaeal;
Zm00001d039020_P001	60S ribosomal protein L18a-2	2.296	Up	0.0119156	plasma membrane	K02882	RP-L18Ae; large subunit ribosomal protein L18Ae	zma03010 Ribosome - Zea mays (maize);	IPR023573;	Ribosomal protein 50S-L18Ae/60S-L20/60S-L18A;
Zm00001d052163_P001	Protein DCL chloroplastic	2.296	Up	0.0072384	chloroplast
Zm00001d025412_P002	Nicotinate phosphoribosyltransferase-like protein	2.295	Up	0.00031819	cytoplasm	K00763	pncB; nicotinate phosphoribosyltransferase [EC:6.3.4.21]	zma01100 Metabolic pathways - Zea mays (maize); zma00760 Nicotinate and nicotinamide metabolism - Zea mays (maize);	IPR002638;	Quinolinate phosphoribosyl transferase, C-terminal;
Zm00001d047780_P014	ABC transporter B family member 6	2.293	Up	0.00162015	plasma membrane	K05658	ABCB1; ATP-binding cassette, subfamily B (MDR/TAP), member 1 [EC:7.6.2.2]	zma02010 ABC transporters - Zea mays (maize);	IPR003593; IPR003439; IPR011527; IPR027417;	AAA+ ATPase domain; ABC transporter-like; ABC transporter type 1, transmembrane domain; P-loop containing nucleoside triphosphate hydrolase;
Zm00001d023867_P007	Golgin candidate 6	2.292	Up	0.0086751	plasma membrane				IPR011989; IPR016024; IPR006953;	Armadillo-like helical; Armadillo-type fold; Vesicle tethering protein Uso1/P115-like , head domain;
Zm00001d034097_P001	cytochrome P450 family 81 subfamily D polypeptide 8	2.288	Up	0.003682	chloroplast
Zm00001d025551_P004	Polyadenylate-binding protein RBP47B	2.288	Up	0.030658	nucleus				IPR000504; IPR012677;	RNA recognition motif domain; Nucleotide-binding alpha-beta plait domain;
Zm00001d052436_P001	ubiquinol-cytochrome C reductase UQCRX/QCR9-like family protein	2.287	Up	0.00136246	cytoplasm	K00419	QCR9; ubiquinol-cytochrome c reductase subunit 9	zma00190 Oxidative phosphorylation - Zea mays (maize); zma01100 Metabolic pathways - Zea mays (maize);
Zm00001d048903_P001	Acidic endochitinase	2.286	Up	0.0030449	chloroplast	K01183	E3.2.1.14; chitinase [EC:3.2.1.14]	zma00520 Amino sugar and nucleotide sugar metabolism - Zea mays (maize); zma01100 Metabolic pathways - Zea mays (maize);	IPR001223; IPR017853; IPR013781;	Glycoside hydrolase family 18, catalytic domain; Glycoside hydrolase superfamily; Glycoside hydrolase, catalytic domain;
Zm00001d019881_P002	Auxin transport protein BIG	2.283	Up	0.00034143	plasma membrane	K10691			IPR011989; IPR016024; IPR000433; IPR003126;	Armadillo-like helical; Armadillo-type fold; Zinc finger, ZZ-type; Zinc finger, UBR-type;
Zm00001d046261_P001	Putative thaumatin domain family protein	2.279	Up	0.0190751	extracellular
Zm00001d030548_P001	2-oxoglutarate (2OG) and Fe(II)-dependent oxygenase superfamily protein	2.279	Up	0.007356	cytoplasm				IPR027443; IPR005123; IPR026992;	Isopenicillin N synthase-like; Oxoglutarate/iron-dependent dioxygenase; Non-haem dioxygenase N-terminal domain;
Zm00001d039263_P001	OB-fold nucleic acid binding domain containing protein	2.272	Up	4.3393e-06	chloroplast	K07466	RFA1; replication factor A1	zma03030 DNA replication - Zea mays (maize); zma03440 Homologous recombination - Zea mays (maize); zma03430 Mismatch repair - Zea mays (maize); zma03420 Nucleotide excision repair - Zea mays (maize);	IPR012340;	Nucleic acid-binding, OB-fold;
Zm00001d048020_P001	hemoglobin1 suppression of expression associated with programmed cell death (Huang et al 2014)cDNA sequence GN= hb1	2.263	Up	2.7887e-06	cytoplasm	K21894			IPR009050; IPR000971; IPR012292;	Globin-like; Globin; Globin/Protoglobin;
Zm00001d011565_P003	Putative ubiquitin-conjugating enzyme family%3B Ubiquitin-conjugating enzyme E2 N	2.262	Up	0.018545	mitochondria	K10580	UBE2N; ubiquitin-conjugating enzyme E2 N [EC:2.3.2.23]	zma04120 Ubiquitin mediated proteolysis - Zea mays (maize);	IPR016135; IPR000608;	Ubiquitin-conjugating enzyme/RWD-like; Ubiquitin-conjugating enzyme E2;
Zm00001d019263_P002	phosphoprotein phosphatase inhibitors	2.262	Up	0.043675	nucleus	K16833
Zm00001d010210_P001	potassium channel6 GN= kch6	2.26	Up	0.0031826	chloroplast	K21867			IPR000595; IPR018490; IPR005821; IPR020683; IPR014710; IPR021789;	Cyclic nucleotide-binding domain; Cyclic nucleotide-binding-like; Ion transport domain; Ankyrin repeat-containing domain; RmlC-like jelly roll fold; KHA domain;
Zm00001d028782_P007	Eukaryotic translation initiation factor 2 subunit alpha	2.256	Up	0.0140205	cytoplasm	K03237	EIF2S1; translation initiation factor 2 subunit 1	zma04141 Protein processing in endoplasmic reticulum - Zea mays (maize); zma03013 RNA transport - Zea mays (maize);	IPR024054; IPR012340; IPR003029; IPR022967; IPR024055;	Translation initiation factor 2, alpha subunit, middle domain; Nucleic acid-binding, OB-fold; S1 domain; RNA-binding domain, S1; Translation initiation factor 2, alpha subunit, C-terminal;
Zm00001d038467_P002	"replication origin activator1 cDNA Z29368, homology with yeast and vertebrate DNA licensing activity GN= roa1"	2.251	Up	0.00110033	cytoplasm	K02541	MCM3; DNA replication licensing factor MCM3 [EC:3.6.4.12]	zma03030 DNA replication - Zea mays (maize);	IPR003593; IPR012340; IPR001208; IPR033762; IPR027417; IPR027925;	AAA+ ATPase domain; Nucleic acid-binding, OB-fold; MCM domain; MCM OB domain; P-loop containing nucleoside triphosphate hydrolase; MCM N-terminal domain;
Zm00001d049438_P001	Germin-like protein subfamily 1 member 8	2.251	Up	0.0005412	extracellular				IPR011051; IPR006045; IPR014710;	RmlC-like cupin domain; Cupin 1; RmlC-like jelly roll fold;
Zm00001d006196_P001	30S ribosomal protein S31	2.243	Up	0.00020386	chloroplast	K19033
Zm00001d041105_P004	E3 ubiquitin-protein ligase UPL1	2.241	Up	0.009638	cytoplasm	K10592	HUWE1; E3 ubiquitin-protein ligase HUWE1 [EC:2.3.2.26]	zma04120 Ubiquitin mediated proteolysis - Zea mays (maize);	IPR015940; IPR010314; IPR025527; IPR016024; IPR010309; IPR000569; IPR009060;	Ubiquitin-associated domain; E3 ubiquitin ligase, domain of unknown function DUF913; Domain of unknown function DUF4414; Armadillo-type fold; E3 ubiquitin ligase, domain of unknown function DUF908; HECT domain; UBA-like;
Zm00001d021018_P006	60S ribosomal protein L32-1	2.238	Up	0.027235	chloroplast	K02912	RP-L32e; large subunit ribosomal protein L32e	zma03010 Ribosome - Zea mays (maize);
Zm00001d014748_P001	(Z)-3-hexen-1-ol acetyltransferase	2.233	Up	0.00064445	chloroplast	K19861			IPR023213;	Chloramphenicol acetyltransferase-like domain;
Zm00001d013296_P001	ATP sulfurylase 1 chloroplastic	2.231	Up	0.0090766	chloroplast	K13811	PAPSS; 3'-phosphoadenosine 5'-phosphosulfate synthase [EC:2.7.7.4 2.7.1.25]	zma00920 Sulfur metabolism - Zea mays (maize); zma01100 Metabolic pathways - Zea mays (maize); zma00261 Monobactam biosynthesis - Zea mays (maize); zma00230 Purine metabolism - Zea mays (maize); zma00450 Selenocompound metabolism - Zea mays (maize);	IPR014729; IPR015947; IPR025980; IPR024951; IPR002650;	Rossmann-like alpha/beta/alpha sandwich fold; PUA-like domain; ATP-sulfurylase PUA-like domain; Sulphate adenylyltransferase catalytic domain; Sulphate adenylyltransferase;
Zm00001d035865_P001	HXXXD-type acyl-transferase family protein	2.231	Up	0.027781	mitochondria				IPR023213;	Chloramphenicol acetyltransferase-like domain;
Zm00001d028966_P002	ELMO/CED-12 family protein	2.223	Up	0.00108435	nucleus				IPR006816;	ELMO domain;
Zm00001d018040_P005	DCD (Development and Cell Death) domain protein	2.21	Up	0.038581	mitochondria				IPR013989;	Development/cell death domain;
Zm00001d012257_P006	uncharacterized protein	2.21	Up	0.0099431	nucleus
Zm00001d009936_P001	Basic endochitinase A	2.206	Up	0.0148823	extracellular	K20547	CHIB; basic endochitinase B [EC:3.2.1.14]	zma00520 Amino sugar and nucleotide sugar metabolism - Zea mays (maize); zma01100 Metabolic pathways - Zea mays (maize); zma04016 MAPK signaling pathway - plant - Zea mays (maize);	IPR023346; IPR001002; IPR000726;	Lysozyme-like domain; Chitin-binding, type 1; Glycoside hydrolase, family 19, catalytic;
Zm00001d029699_P002	glutathione transferase42 GN= gst42	2.206	Up	0.036464	cytoplasm	K00799	GST; glutathione S-transferase [EC:2.5.1.18]	zma00480 Glutathione metabolism - Zea mays (maize);	IPR010987; IPR004045; IPR012336;	Glutathione S-transferase, C-terminal-like; Glutathione S-transferase, N-terminal; Thioredoxin-like fold;
Zm00001d051067_P022	EXPRESSED IN 24 plant structures GN=LOCATED IN: cytosol chloroplast	2.205	Up	0.00125963	nucleus
Zm00001d033262_P001	Protein LSD1	2.203	Up	0.011338	chloroplast				IPR005735;	Zinc finger, LSD1-type;
Zm00001d041979_P001	Chloroplast outer envelope 24 kD protein	2.202	Up	0.044496	mitochondria
Zm00001d001960_P002	Naringenin2-oxoglutarate 3-dioxygenase	2.201	Up	0.038356	chloroplast	K00475	F3H; naringenin 3-dioxygenase [EC:1.14.11.9]	zma01110 Biosynthesis of secondary metabolites - Zea mays (maize); zma01100 Metabolic pathways - Zea mays (maize); zma00941 Flavonoid biosynthesis - Zea mays (maize);	IPR005123; IPR027443;	Oxoglutarate/iron-dependent dioxygenase; Isopenicillin N synthase-like;
Zm00001d042394_P010	BLISTER	2.198	Up	5.7529e-05	nucleus
Zm00001d002395_P002	60S ribosomal protein L7-2	2.194	Up	0.004842	cytoplasm	K02937	RP-L7e; large subunit ribosomal protein L7e	zma03010 Ribosome - Zea mays (maize);	IPR012988; IPR016082;	Ribosomal protein L30, N-terminal; Ribosomal protein L30, ferredoxin-like fold domain;
Zm00001d019091_P001	Vesicle-associated membrane protein 722	2.192	Up	0.000156644	extracellular	K08515	VAMP7; vesicle-associated membrane protein 7	zma04130 SNARE interactions in vesicular transport - Zea mays (maize);	IPR010908; IPR011012; IPR001388;	Longin domain; Longin-like domain; Synaptobrevin;
Zm00001d042950_P001	Lung seven transmembrane receptor family protein	2.188	Up	0.00092023	plasma membrane	K22985
Zm00001d048957_P002	uncharacterized protein	2.181	Up	0.000102985	nucleus
Zm00001d034776_P006	Elongation factor 2	2.177	Up	0.039196	cytoplasm	K03234			IPR027417; IPR000795; IPR005517; IPR005225; IPR000640; IPR004161; IPR020568; IPR009022; IPR014721; IPR009000;	P-loop containing nucleoside triphosphate hydrolase; Transcription factor, GTP-binding domain; Translation elongation factor EFG/EF2, domain IV; Small GTP-binding protein domain; Translation elongation factor EFG, V domain; Translation elongation factor EFTu-like, domain 2; Ribosomal protein S5 domain 2-type fold; Elongation factor G, III-V domain; Ribosomal protein S5 domain 2-type fold, subgrou…
Zm00001d018514_P004	Protein BTR1	2.177	Up	0.00073689	nucleus	K14944			IPR004087; IPR004088;	K Homology domain; K Homology domain, type 1;
Zm00001d052286_P003	uncharacterized protein	2.175	Up	0.00054009	chloroplast
Zm00001d046445_P005	Transducin/WD40 repeat-like superfamily protein	2.17	Up	0.008383	cytoplasm	K13137	STRAP; serine-threonine kinase receptor-associated protein	zma03013 RNA transport - Zea mays (maize);	IPR017986; IPR015943;	WD40-repeat-containing domain; WD40/YVTN repeat-like-containing domain;
Zm00001d018495_P003	Thioredoxin-like 3-2 chloroplastic	2.162	Up	0.0045371	chloroplast				IPR013766; IPR012336;	Thioredoxin domain; Thioredoxin-like fold;
Zm00001d037684_P001	uncharacterized protein	2.159	Up	0.046421	nucleus
Zm00001d043861_P001	THO complex subunit 2	2.155	Up	0.0167403	nucleus	K12879	THOC2; THO complex subunit 2	zma03040 Spliceosome - Zea mays (maize); zma03013 RNA transport - Zea mays (maize);	IPR021418; IPR032302; IPR021726;	THO complex, subunitTHOC2, C-terminal; THO complex subunit 2, N-terminal domain; THO complex, subunitTHOC2, N-terminal;
Zm00001d045210_P001	Dirigent	2.153	Up	0.0154964	cytoplasm
Zm00001d026291_P005	DNA methyl transferase2 GN= met2	2.152	Up	0.00067999	chloroplast	K00558	DNMT1; DNA (cytosine-5)-methyltransferase 1 [EC:2.1.1.37]	zma01100 Metabolic pathways - Zea mays (maize); zma00270 Cysteine and methionine metabolism - Zea mays (maize);	IPR023780; IPR029063; IPR016197; IPR000953;	Chromo domain; S-adenosyl-L-methionine-dependent methyltransferase; Chromo domain-like; Chromo/chromo shadow domain;
Zm00001d013276_P016	Myosin-12	2.152	Up	0.0042595	chloroplast	K10357			IPR002710; IPR027417; IPR001609;	Dilute domain; P-loop containing nucleoside triphosphate hydrolase; Myosin head, motor domain;
Zm00001d003352_P002	Per1-like family protein	2.151	Up	0.0100395	plasma membrane
Zm00001d005062_P003	Vacuolar-sorting receptor 1	2.148	Up	4.3053e-05	plasma membrane				IPR003137; IPR001881;	PA domain; EGF-like calcium-binding domain;
Zm00001d052450_P002	Pentatricopeptide repeat-containing protein	2.146	Up	0.00046029	chloroplast
Zm00001d039883_P001	Mitochondrial glycoprotein family protein	2.144	Up	0.0026831	chloroplast	K15414
Zm00001d015804_P010	ADP-ribosylation factor GTPase-activating protein AGD12	2.143	Up	0.049016	cytoplasm	K12486	SMAP; stromal membrane-associated protein	zma04144 Endocytosis - Zea mays (maize);	IPR000008;	C2 domain;
Zm00001d042767_P001	Glucan endo-13-beta-glucosidase 14	2.142	Up	8.0724e-05	chloroplast				IPR017853; IPR013781;	Glycoside hydrolase superfamily; Glycoside hydrolase, catalytic domain;
Zm00001d003494_P001	uncharacterized protein	2.129	Up	0.037257	cytoplasm
Zm00001d031257_P001	Cupredoxin superfamily protein	2.127	Up	0.0182648	chloroplast				IPR003245; IPR008972;	Phytocyanin domain; Cupredoxin;
Zm00001d039081_P007	CTP synthase family protein	2.113	Up	0.0130232	cytoplasm	K01937	pyrG; CTP synthase [EC:6.3.4.2]	zma00240 Pyrimidine metabolism - Zea mays (maize); zma01100 Metabolic pathways - Zea mays (maize);	IPR017456; IPR027417; IPR017926; IPR033828; IPR029062;	CTP synthase, N-terminal; P-loop containing nucleoside triphosphate hydrolase; Glutamine amidotransferase; CTP synthase GATase domain; Class I glutamine amidotransferase-like;
Zm00001d028630_P005	Heat shock cognate 70 kDa protein 2	2.109	Up	0.00032099	cytoplasm	K03283	HSPA1s; heat shock 70kDa protein 1/2/6/8	zma04144 Endocytosis - Zea mays (maize); zma03040 Spliceosome - Zea mays (maize); zma04141 Protein processing in endoplasmic reticulum - Zea mays (maize);	IPR029048; IPR029047;	Heat shock protein 70kD, C-terminal domain; Heat shock protein 70kD, peptide-binding domain;
Zm00001d009660_P001	Protein kinase superfamily protein	2.108	Up	0.0022033	cytoplasm				IPR000719; IPR001245; IPR011009;	Protein kinase domain; Serine-threonine/tyrosine-protein kinase catalytic domain; Protein kinase-like domain;
Zm00001d022557_P001	nicotianamine synthase5 function inferred from sequence similarity GN= nas5	2.106	Up	0.0035031	cytoplasm	K05953			IPR029063;	S-adenosyl-L-methionine-dependent methyltransferase;
Zm00001d009476_P002	Probable ribosomal protein S11 mitochondrial	2.094	Up	0.0115198	chloroplast	K02948	RP-S11; small subunit ribosomal protein S11	zma03010 Ribosome - Zea mays (maize);
Zm00001d027502_P002	Adenylate kinase 1 chloroplastic	2.091	Up	0.036464	chloroplast	K00939	adk; adenylate kinase [EC:2.7.4.3]	zma00730 Thiamine metabolism - Zea mays (maize); zma01110 Biosynthesis of secondary metabolites - Zea mays (maize); zma01100 Metabolic pathways - Zea mays (maize); zma00230 Purine metabolism - Zea mays (maize);	IPR027417;	P-loop containing nucleoside triphosphate hydrolase;
Zm00001d018342_P002	trehalose-6-phosphate synthase11 GN= trps11	2.088	Up	3.5849e-05	nucleus	K16055	TPS; trehalose 6-phosphate synthase/phosphatase [EC:2.4.1.15 3.1.3.12]	zma00500 Starch and sucrose metabolism - Zea mays (maize); zma01100 Metabolic pathways - Zea mays (maize);	IPR001830; IPR023214;	Glycosyl transferase, family 20; HAD-like domain;
Zm00001d013914_P001	Membrane steroid-binding protein 1	2.084	Up	0.00038188	chloroplast	K17278			IPR001199;	Cytochrome b5-like heme/steroid binding domain;
Zm00001d007623_P003	Patatin-like protein 2	2.082	Up	0.0116003	chloroplast				IPR016035; IPR002641;	Acyl transferase/acyl hydrolase/lysophospholipase; Patatin/Phospholipase A2-related;
Zm00001d002386_P004	uncharacterized protein	2.08	Up	0.00158335	cytoplasm
Zm00001d052021_P003	DNA replication licensing factor MCM5	2.075	Up	0.000136333	nucleus	K02209	MCM5; DNA replication licensing factor MCM5 [EC:3.6.4.12]	zma03030 DNA replication - Zea mays (maize);	IPR001208; IPR012340; IPR027417; IPR033762; IPR027925;	MCM domain; Nucleic acid-binding, OB-fold; P-loop containing nucleoside triphosphate hydrolase; MCM OB domain; MCM N-terminal domain;
Zm00001d036148_P002	pentatricopeptide repeat 5 stabilizes the chloroplast unspliced trnG precursor GN= ppr5	2.074	Up	0.0140165	chloroplast				IPR009044;	ssDNA-binding transcriptional regulator;
Zm00001d005539_P004	Ferrochelatase	2.071	Up	0.00091967	chloroplast	K01772	hemH; protoporphyrin/coproporphyrin ferrochelatase [EC:4.99.1.1 4.99.1.9]	zma00860 Porphyrin and chlorophyll metabolism - Zea mays (maize); zma01110 Biosynthesis of secondary metabolites - Zea mays (maize); zma01100 Metabolic pathways - Zea mays (maize);	IPR033659;	Ferrochelatase, N-terminal;
Zm00001d004731_P002	Aldehyde dehydrogenase	2.068	Up	0.0002219	cytoplasm	K00128	ALDH; aldehyde dehydrogenase (NAD+) [EC:1.2.1.3]	zma00010 Glycolysis / Gluconeogenesis - Zea mays (maize); zma00410 beta-Alanine metabolism - Zea mays (maize); zma00071 Fatty acid degradation - Zea mays (maize); zma00340 Histidine metabolism - Zea mays (maize); zma00053 Ascorbate and aldarate metabolism - Zea mays (maize); zma01110 Biosynthesis of secondary metabolites - Zea mays (maize); zma00561 Glycerolipid metabolism - Zea mays (maize); zma…	IPR016161; IPR015590; IPR016162; IPR016163;	Aldehyde/histidinol dehydrogenase; Aldehyde dehydrogenase domain; Aldehyde dehydrogenase N-terminal domain; Aldehyde dehydrogenase, C-terminal;
Zm00001d046442_P002	SOUL heme-binding family protein	2.064	Up	0.036256	chloroplast				IPR011256;	Regulatory factor, effector binding domain;
Zm00001d023802_P001	Heat shock 70 kDa protein 6 chloroplastic	2.061	Up	0.0133609	chloroplast	K03283	HSPA1s; heat shock 70kDa protein 1/2/6/8	zma04144 Endocytosis - Zea mays (maize); zma03040 Spliceosome - Zea mays (maize); zma04141 Protein processing in endoplasmic reticulum - Zea mays (maize);	IPR029048; IPR029047;	Heat shock protein 70kD, C-terminal domain; Heat shock protein 70kD, peptide-binding domain;
Zm00001d041606_P013	minichromosome maintenance2 a cell cycle gene regulated by tb1 GN= mcm2	2.058	Up	0.0106992	nucleus	K02210	MCM7; DNA replication licensing factor MCM7 [EC:3.6.4.12]	zma03030 DNA replication - Zea mays (maize);	IPR001208; IPR027417;	MCM domain; P-loop containing nucleoside triphosphate hydrolase;
Zm00001d039860_P001	E3 ubiquitin-protein ligase PRT6	2.057	Up	0.034357	nucleus				IPR011991; IPR013083; IPR003126;	Winged helix-turn-helix DNA-binding domain; Zinc finger, RING/FYVE/PHD-type; Zinc finger, UBR-type;
Zm00001d029028_P001	Calcium-binding protein CML42	2.047	Up	0.00144102	chloroplast	K13448	CML; calcium-binding protein CML	zma04626 Plant-pathogen interaction - Zea mays (maize);	IPR011992; IPR002048;	EF-hand domain pair; EF-hand domain;
Zm00001d021629_P002	Protein DETOXIFICATION 40	2.043	Up	0.00093577	chloroplast	K03327
Zm00001d017120_P003	"nuclear binding protein35 single copy leaf cDNA, csu598, similar to NBP35 protein GN= nbp35"	2.039	Up	0.0074436	cytoplasm				IPR027417;	P-loop containing nucleoside triphosphate hydrolase;
Zm00001d037200_P002	Polyadenylate-binding protein 3	2.038	Up	0.00064099	nucleus	K14396	PABPN1; polyadenylate-binding protein 2	zma03015 mRNA surveillance pathway - Zea mays (maize);	IPR000504; IPR012677;	RNA recognition motif domain; Nucleotide-binding alpha-beta plait domain;
Zm00001d020224_P002	Has 214 Blast hits to 214 proteins in 102 species Archae - 0 GN=CONTAINS InterPro DOMAIN/s: Mitochondrial distribution/morphology family 35/apoptosis (InterPro:IPR007918)	2.036	Up	0.000161821	chloroplast	K17968
Zm00001d023856_P001	RALF	2.036	Up	0.0102242	extracellular
Zm00001d032573_P001	Probable prolyl 4-hydroxylase 3	2.036	Up	0.0134376	chloroplast	K00472	P4HA; prolyl 4-hydroxylase [EC:1.14.11.2]	zma01100 Metabolic pathways - Zea mays (maize); zma00330 Arginine and proline metabolism - Zea mays (maize);	IPR006620; IPR005123;	Prolyl 4-hydroxylase, alpha subunit; Oxoglutarate/iron-dependent dioxygenase;
Zm00001d032102_P001	DUF761 domain protein	2.029	Up	0.00075954	nucleus
Zm00001d021929_P001	geranylgeranyl pyrophosphate synthase3 part of multigene family encoding geranylgeranyl diphosphate synthase GN= ggps3	2.028	Up	0.0033965	chloroplast	K13789	GGPS; geranylgeranyl diphosphate synthase, type II [EC:2.5.1.1 2.5.1.10 2.5.1.29]	zma00900 Terpenoid backbone biosynthesis - Zea mays (maize); zma01110 Biosynthesis of secondary metabolites - Zea mays (maize); zma01100 Metabolic pathways - Zea mays (maize);	IPR008949;	Isoprenoid synthase domain;
Zm00001d009591_P010	GBF-interacting protein 1	2.026	Up	0.028517	nucleus				IPR009060;	UBA-like;
Zm00001d011013_P001	Calcium pump1	2.024	Up	0.045377	plasma membrane	K01537			IPR004014; IPR023298; IPR023299; IPR008250; IPR023214; IPR006068;	Cation-transporting P-type ATPase, N-terminal; P-type ATPase, transmembrane domain; P-type ATPase, cytoplasmic domain N; P-type ATPase, A domain; HAD-like domain; Cation-transporting P-type ATPase, C-terminal;
Zm00001d009542_P002	Golgin candidate 5	2.024	Up	0.0047959	nucleus	K20286
Zm00001d006147_P009	Ankyrin repeat family protein	2.021	Up	0.00121875	plasma membrane				IPR026961; IPR020683;	PGG domain; Ankyrin repeat-containing domain;
Zm00001d010840_P001	triacylglycerol lipase-like 1	2.02	Up	0.00041785	plasma membrane				IPR002921; IPR029058;	Fungal lipase-like domain; Alpha/Beta hydrolase fold;
Zm00001d007486_P001	UDP-glycosyltransferase 72B1	2.018	Up	1.0843e-06	chloroplast	K08237
Zm00001d048690_P001	Serine carboxypeptidase-like 50	2.017	Up	1.66626e-05	chloroplast	K09645			IPR029058;	Alpha/Beta hydrolase fold;
Zm00001d031310_P001	Nuclear transcription factor Y subunit C-2	2.014	Up	0.0022013	nucleus	K08066			IPR003958; IPR009072;	Transcription factor CBF/NF-Y/archaeal histone domain; Histone-fold;
Zm00001d049815_P005	ribosomal protein L17b GN= rpl17b	2.014	Up	0.0051982	nucleus	K02880	RP-L17e; large subunit ribosomal protein L17e	zma03010 Ribosome - Zea mays (maize);
Zm00001d048336_P004	Serine/threonine-protein phosphatase	2.005	Up	5.8207e-05	cytoplasm	K04382	PPP2C; serine/threonine-protein phosphatase 2A catalytic subunit [EC:3.1.3.16]	zma03015 mRNA surveillance pathway - Zea mays (maize); zma04136 Autophagy - other - Zea mays (maize);	IPR029052; IPR004843; IPR006186;	Metallo-dependent phosphatase-like; Calcineurin-like phosphoesterase domain, ApaH type; Serine/threonine-specific protein phosphatase/bis(5-nucleosyl)-tetraphosphatase;
Zm00001d037929_P002	40S ribosomal protein S5-2	2.003	Up	0.0154411	cytoskeleton	K02989	RP-S5e; small subunit ribosomal protein S5e	zma03010 Ribosome - Zea mays (maize);	IPR023798;	Ribosomal protein S7 domain;
Zm00001d006397_P001	UDP-glycosyltransferase 85A7	2.002	Up	0.00099596	vacuolar membrane
Zm00001d037934_P005	UDP-glucuronic acid decarboxylase 4	1.997	Up	0.00063979	chloroplast	K08678	UXS1; UDP-glucuronate decarboxylase [EC:4.1.1.35]	zma00520 Amino sugar and nucleotide sugar metabolism - Zea mays (maize); zma01100 Metabolic pathways - Zea mays (maize);	IPR016040;	NAD(P)-binding domain;
Zm00001d039330_P002	V-type proton ATPase subunit E3	1.996	Up	0.00120444	cytoplasm	K02150	ATPeV1E; V-type H+-transporting ATPase subunit E	zma04145 Phagosome - Zea mays (maize); zma00190 Oxidative phosphorylation - Zea mays (maize); zma01100 Metabolic pathways - Zea mays (maize);
Zm00001d013862_P001	Cytochrome P450 84A1	1.996	Up	0.0080624	chloroplast	K09755	CYP84A; ferulate-5-hydroxylase [EC:1.14.-.-]	zma00940 Phenylpropanoid biosynthesis - Zea mays (maize); zma01110 Biosynthesis of secondary metabolites - Zea mays (maize); zma01100 Metabolic pathways - Zea mays (maize);
Zm00001d038262_P001	Patellin-1	1.993	Up	0.00185617	nucleus				IPR001251; IPR009038; IPR011074;	CRAL-TRIO lipid binding domain; GOLD domain; CRAL/TRIO, N-terminal domain;
Zm00001d045605_P001	Glycine--tRNA ligase chloroplastic/mitochondrial 2	1.991	Up	0.0173843	chloroplast	K14164	glyQS; glycyl-tRNA synthetase [EC:6.1.1.14]	zma00970 Aminoacyl-tRNA biosynthesis - Zea mays (maize);
Zm00001d009296_P001	Pathogenesis-related protein PRMS	1.982	Up	0.023562	extracellular	K13449	PR1; pathogenesis-related protein 1	zma04626 Plant-pathogen interaction - Zea mays (maize); zma04016 MAPK signaling pathway - plant - Zea mays (maize); zma04075 Plant hormone signal transduction - Zea mays (maize);	IPR034111; IPR014044;	Pathogenesis-related protein 1-like, SCP domain; CAP domain;
Zm00001d037711_P001	Leucine-rich repeat extensin-like protein 3	1.981	Up	0.040742	extracellular				IPR032675;	Leucine-rich repeat domain, L domain-like;
Zm00001d020794_P001	Blue copper protein	1.978	Up	0.03866	extracellular				IPR003245; IPR008972;	Phytocyanin domain; Cupredoxin;
Zm00001d023833_P003	Nucleoside diphosphate kinase	1.974	Up	0.00169693	chloroplast	K00940	ndk; nucleoside-diphosphate kinase [EC:2.7.4.6]	zma00240 Pyrimidine metabolism - Zea mays (maize); zma01110 Biosynthesis of secondary metabolites - Zea mays (maize); zma01100 Metabolic pathways - Zea mays (maize); zma04016 MAPK signaling pathway - plant - Zea mays (maize); zma00230 Purine metabolism - Zea mays (maize);
Zm00001d012824_P001	RNA binding protein	1.974	Up	0.0048575	chloroplast				IPR000999;	Ribonuclease III domain;
Zm00001d052653_P004	respiratory burst oxidase4 GN= rboh4	1.97	Up	5.5877e-05	plasma membrane	K13447	RBOH; respiratory burst oxidase [EC:1.6.3.- 1.11.1.-]	zma04626 Plant-pathogen interaction - Zea mays (maize); zma04016 MAPK signaling pathway - plant - Zea mays (maize);	IPR017927; IPR002048; IPR011992; IPR013130; IPR013623; IPR013121; IPR013112; IPR017938;	Ferredoxin reductase-type FAD-binding domain; EF-hand domain; EF-hand domain pair; Ferric reductase transmembrane component-like domain; NADPH oxidase Respiratory burst; Ferric reductase, NAD binding domain; FAD-binding 8; Riboflavin synthase-like beta-barrel;
Zm00001d013793_P002	HD domain-containing metal-dependent phosphohydrolase family protein	1.968	Up	0.0083375	nucleus	K22544			IPR023214;	HAD-like domain;
Zm00001d046184_P001	Peroxidase 52	1.966	Up	0.00034445	chloroplast	K00430	E1.11.1.7; peroxidase [EC:1.11.1.7]	zma00940 Phenylpropanoid biosynthesis - Zea mays (maize); zma01110 Biosynthesis of secondary metabolites - Zea mays (maize); zma01100 Metabolic pathways - Zea mays (maize);	IPR033905; IPR002016;	Secretory peroxidase; Haem peroxidase, plant/fungal/bacterial;
Zm00001d048507_P006	Major Facilitator family protein%3B Major Facilitator superfamily protein	1.965	Up	0.028859	plasma membrane				IPR020846;	Major facilitator superfamily domain;
Zm00001d033383_P002	hydroxymethylpyrimidine phosphate synthase1 GN= thic1	1.964	Up	0.0080213	chloroplast	K03147	thiC; phosphomethylpyrimidine synthase [EC:4.1.99.17]	zma00730 Thiamine metabolism - Zea mays (maize); zma01100 Metabolic pathways - Zea mays (maize);
Zm00001d050920_P002	60S ribosomal protein L6	1.963	Up	0.0060765	chloroplast	K02934	RP-L6e; large subunit ribosomal protein L6e	zma03010 Ribosome - Zea mays (maize);	IPR008991; IPR014722;	Translation protein SH3-like domain; Ribosomal protein L2 domain 2;
Zm00001d019262_P002	Proteasome subunit beta type	1.96	Up	0.026302	chloroplast	K02739	PSMB7; 20S proteasome subunit beta 2 [EC:3.4.25.1]	zma03050 Proteasome - Zea mays (maize);	IPR029055;	Nucleophile aminohydrolases, N-terminal;
Zm00001d011208_P001	1-aminocyclopropane-1-carboxylate oxidase 1	1.959	Up	0.00096329	cytoplasm	K05933	E1.14.17.4; aminocyclopropanecarboxylate oxidase [EC:1.14.17.4]	zma01110 Biosynthesis of secondary metabolites - Zea mays (maize); zma01100 Metabolic pathways - Zea mays (maize); zma00270 Cysteine and methionine metabolism - Zea mays (maize);	IPR027443; IPR005123; IPR026992;	Isopenicillin N synthase-like; Oxoglutarate/iron-dependent dioxygenase; Non-haem dioxygenase N-terminal domain;
Zm00001d040010_P003	uncharacterized protein	1.957	Up	0.0165632	nucleus
Zm00001d016902_P003	Bifunctional riboflavin biosynthesis protein RIBA 1 chloroplastic	1.956	Up	0.020541	chloroplast	K14652	ribBA; 3,4-dihydroxy 2-butanone 4-phosphate synthase / GTP cyclohydrolase II [EC:4.1.99.12 3.5.4.25]	zma00790 Folate biosynthesis - Zea mays (maize); zma01110 Biosynthesis of secondary metabolites - Zea mays (maize); zma01100 Metabolic pathways - Zea mays (maize); zma00740 Riboflavin metabolism - Zea mays (maize);	IPR032677; IPR017945;	GTP cyclohydrolase II; DHBP synthase RibB-like alpha/beta domain;
Zm00001d042453_P003	aldolase1 cytosolic aldolase GN= ald1	1.953	Up	0.0025998	chloroplast	K01623	ALDO; fructose-bisphosphate aldolase, class I [EC:4.1.2.13]	zma00030 Pentose phosphate pathway - Zea mays (maize); zma00010 Glycolysis / Gluconeogenesis - Zea mays (maize); zma01230 Biosynthesis of amino acids - Zea mays (maize); zma01200 Carbon metabolism - Zea mays (maize); zma01110 Biosynthesis of secondary metabolites - Zea mays (maize); zma01100 Metabolic pathways - Zea mays (maize); zma00051 Fructose and mannose metabolism - Zea mays (maize); zma007…	IPR013785;	Aldolase-type TIM barrel;
Zm00001d032760_P001	60S ribosomal protein L21-1	1.952	Up	0.0060775	cytoplasm	K02889	RP-L21e; large subunit ribosomal protein L21e	zma03010 Ribosome - Zea mays (maize);	IPR008991;	Translation protein SH3-like domain;
Zm00001d037732_P002	60S ribosomal protein L17-2	1.95	Up	0.0167588	nucleus	K02880	RP-L17e; large subunit ribosomal protein L17e	zma03010 Ribosome - Zea mays (maize);
Zm00001d011097_P001	12-oxophytodienoate reductase 1	1.944	Up	0.00027565	cytoplasm	K05894	OPR; 12-oxophytodienoic acid reductase [EC:1.3.1.42]	zma00592 alpha-Linolenic acid metabolism - Zea mays (maize); zma01110 Biosynthesis of secondary metabolites - Zea mays (maize); zma01100 Metabolic pathways - Zea mays (maize);	IPR013785; IPR001155;	Aldolase-type TIM barrel; NADH:flavin oxidoreductase/NADH oxidase, N-terminal;
Zm00001d036401_P001	Endoplasmin homolog	1.943	Up	0.0057553	endoplasmic reticulum	K09487	HSP90B; heat shock protein 90kDa beta	zma04626 Plant-pathogen interaction - Zea mays (maize); zma04141 Protein processing in endoplasmic reticulum - Zea mays (maize);	IPR020575; IPR020568; IPR003594;	Heat shock protein Hsp90, N-terminal; Ribosomal protein S5 domain 2-type fold; Histidine kinase-like ATPase, C-terminal domain;
Zm00001d020401_P001	Probable cinnamyl alcohol dehydrogenase 6	1.942	Up	0.00180098	chloroplast	K00083	E1.1.1.195; cinnamyl-alcohol dehydrogenase [EC:1.1.1.195]	zma00940 Phenylpropanoid biosynthesis - Zea mays (maize); zma01110 Biosynthesis of secondary metabolites - Zea mays (maize); zma01100 Metabolic pathways - Zea mays (maize);	IPR011032; IPR016040; IPR013154; IPR013149;	GroES-like; NAD(P)-binding domain; Alcohol dehydrogenase, N-terminal; Alcohol dehydrogenase, C-terminal;
Zm00001d002028_P001	Protein FATTY ACID EXPORT 2 chloroplastic	1.941	Up	0.022224	chloroplast
Zm00001d052735_P013	Plant UBX domain-containing protein 8	1.94	Up	0.039204	nucleus				IPR029071; IPR001012; IPR009060;	Ubiquitin-related domain; UBX domain; UBA-like;
Zm00001d022059_P002	PLASMODESMATA CALLOSE-BINDING PROTEIN 2	1.937	Up	0.034382	extracellular				IPR012946;	X8 domain;
Zm00001d002325_P002	uncharacterized protein	1.937	Up	0.00031916	cytoplasm	K20283
Zm00001d041730_P003	uncharacterized protein	1.933	Up	9.8935e-05	nucleus				IPR001607; IPR013083;	Zinc finger, UBP-type; Zinc finger, RING/FYVE/PHD-type;
Zm00001d002175_P001	Receptor-like protein kinase FERONIA	1.932	Up	0.0121365	vacuolar membrane				IPR000719; IPR001245; IPR024788; IPR013320; IPR011009;	Protein kinase domain; Serine-threonine/tyrosine-protein kinase catalytic domain; Malectin-like carbohydrate-binding domain; Concanavalin A-like lectin/glucanase domain; Protein kinase-like domain;
Zm00001d010319_P001	cytochrome P450 family 721 subfamily A polypeptide 1	1.927	Up	0.0090408	chloroplast
Zm00001d048214_P001	protein GN=CHP-rich zinc finger protein-like	1.926	Up	0.0053635	chloroplast				IPR002219; IPR004146;	Protein kinase C-like, phorbol ester/diacylglycerol-binding domain; DC1;
Zm00001d037550_P001	"peroxidase 5 cathodal, presence-absence GN= px5"	1.925	Up	3.6486e-05	chloroplast	K00430	E1.11.1.7; peroxidase [EC:1.11.1.7]	zma00940 Phenylpropanoid biosynthesis - Zea mays (maize); zma01110 Biosynthesis of secondary metabolites - Zea mays (maize); zma01100 Metabolic pathways - Zea mays (maize);	IPR033905; IPR002016;	Secretory peroxidase; Haem peroxidase, plant/fungal/bacterial;
Zm00001d029056_P003	Vacuolar-sorting receptor 1	1.914	Up	0.0166363	vacuolar membrane				IPR003137; IPR001881; IPR012336;	PA domain; EGF-like calcium-binding domain; Thioredoxin-like fold;
Zm00001d013290_P002	Transmembrane emp24 domain-containing protein p24beta3	1.913	Up	0.011321	cytoplasm	K20347			IPR009038;	GOLD domain;
Zm00001d037547_P001	guaiacol peroxidase3 GN= pox3	1.913	Up	0.042839	chloroplast	K00430	E1.11.1.7; peroxidase [EC:1.11.1.7]	zma00940 Phenylpropanoid biosynthesis - Zea mays (maize); zma01110 Biosynthesis of secondary metabolites - Zea mays (maize); zma01100 Metabolic pathways - Zea mays (maize);	IPR033905; IPR002016;	Secretory peroxidase; Haem peroxidase, plant/fungal/bacterial;
Zm00001d005594_P001	Sugar transport protein 14	1.911	Up	0.00030264	plasma membrane				IPR020846;	Major facilitator superfamily domain;
Zm00001d027366_P002	peroxisomal membrane protein homolog1 GN= pmp1	1.908	Up	0.0034602	plasma membrane
Zm00001d001814_P001	Clathrin light chain 2	1.906	Up	0.00090242	nucleus
Zm00001d040670_P004	Lipoamide acyltransferase component of branched-chain alpha-keto acid dehydrogenase complex mitochondrial	1.903	Up	0.002798	mitochondria	K09699	DBT; 2-oxoisovalerate dehydrogenase E2 component (dihydrolipoyl transacylase) [EC:2.3.1.168]	zma00640 Propanoate metabolism - Zea mays (maize); zma01110 Biosynthesis of secondary metabolites - Zea mays (maize); zma01100 Metabolic pathways - Zea mays (maize); zma00280 Valine, leucine and isoleucine degradation - Zea mays (maize);	IPR004167; IPR001078; IPR011053; IPR000089; IPR023213;	E3-binding domain; 2-oxoacid dehydrogenase acyltransferase, catalytic domain; Single hybrid motif; Biotin/lipoyl attachment; Chloramphenicol acetyltransferase-like domain;
Zm00001d036642_P002	Zinc-binding protein	1.902	Up	0.00192036	mitochondria	K02503			IPR011146;	HIT-like domain;
Zm00001d029195_P003	terpene synthase8 GN= tps8	1.9	Up	0.017956	cytoplasm	K15803	GERD; (-)-germacrene D synthase [EC:4.2.3.75]	zma00909 Sesquiterpenoid and triterpenoid biosynthesis - Zea mays (maize);	IPR005630; IPR008949; IPR008930; IPR001906;	Terpene synthase, metal-binding domain; Isoprenoid synthase domain; Terpenoid cyclases/protein prenyltransferase alpha-alpha toroid; Terpene synthase, N-terminal domain;
Zm00001d024675_P001	RNA-binding (RRM/RBD/RNP motifs) family protein	1.899	Up	0.013864	chloroplast				IPR000504; IPR012677;	RNA recognition motif domain; Nucleotide-binding alpha-beta plait domain;
Zm00001d033896_P001	"lemon white1 white seedling, pale yellow endosperm GN= lw1"	1.894	Up	0.0005824	chloroplast	K03527	ispH; 4-hydroxy-3-methylbut-2-en-1-yl diphosphate reductase [EC:1.17.7.4]	zma00900 Terpenoid backbone biosynthesis - Zea mays (maize); zma01110 Biosynthesis of secondary metabolites - Zea mays (maize); zma01100 Metabolic pathways - Zea mays (maize);
Zm00001d046552_P002	Charged multivesicular body protein 4b%3B Putative SNF domain containing family protein	1.894	Up	0.00080009	chloroplast	K12194	CHMP4; charged multivesicular body protein 4	zma04144 Endocytosis - Zea mays (maize);
Zm00001d034883_P002	protein binding GN=nucleotide binding	1.893	Up	0.0063424	nucleus	K11806			IPR017986; IPR015943;	WD40-repeat-containing domain; WD40/YVTN repeat-like-containing domain;
Zm00001d026649_P001	opaque endosperm7 like o1 GN= o7	1.892	Up	4.338e-05	chloroplast	K22133	AAE3; oxalate---CoA ligase [EC:6.2.1.8]	zma01100 Metabolic pathways - Zea mays (maize); zma00630 Glyoxylate and dicarboxylate metabolism - Zea mays (maize);	IPR025110; IPR000873;	AMP-binding enzyme C-terminal domain; AMP-dependent synthetase/ligase;
Zm00001d005687_P006	trehalose-6-phosphate synthase5 GN= trps5	1.892	Up	0.021175	nucleus	K16055	TPS; trehalose 6-phosphate synthase/phosphatase [EC:2.4.1.15 3.1.3.12]	zma00500 Starch and sucrose metabolism - Zea mays (maize); zma01100 Metabolic pathways - Zea mays (maize);	IPR001830; IPR023214;	Glycosyl transferase, family 20; HAD-like domain;
Zm00001d027706_P002	transducin family protein / WD-40 repeat family protein	1.891	Up	4.3577e-05	chloroplast	K14556	DIP2; U3 small nucleolar RNA-associated protein 12	zma03008 Ribosome biogenesis in eukaryotes - Zea mays (maize);	IPR017986; IPR015943; IPR007148;	WD40-repeat-containing domain; WD40/YVTN repeat-like-containing domain; Small-subunit processome, Utp12;
Zm00001d018337_P001	60S ribosome subunit biogenesis protein NIP7 homolog	1.89	Up	0.0197445	cytoplasm	K07565			IPR015947; IPR002478;	PUA-like domain; PUA domain;
Zm00001d040470_P015	Exonuclease domain-containing protein 1	1.887	Up	0.0038402	cytoplasm	K18417			IPR012337; IPR013520; IPR010666;	Ribonuclease H-like domain; Exonuclease, RNase T/DNA polymerase III; Zinc finger, GRF-type;
Zm00001d027387_P001	Subtilisin-like protease SBT1.9	1.885	Up	0.0163773	chloroplast				IPR003137; IPR034197; IPR000209; IPR010259;	PA domain; Cucumisin-like catalytic domain; Peptidase S8/S53 domain; Peptidase S8 propeptide/proteinase inhibitor I9;
Zm00001d020390_P001	17.4 kDa class III heat shock protein	1.879	Up	0.0044234	cytoplasm	K13993	HSP20; HSP20 family protein	zma04141 Protein processing in endoplasmic reticulum - Zea mays (maize);	IPR002068; IPR008978;	Alpha crystallin/Hsp20 domain; HSP20-like chaperone;
Zm00001d020780_P001	"glutathione transferase23 cDNA, SSR umc2098 GN= gst23"	1.876	Up	0.0047217	chloroplast	K00799	GST; glutathione S-transferase [EC:2.5.1.18]	zma00480 Glutathione metabolism - Zea mays (maize);	IPR010987; IPR004045; IPR012336;	Glutathione S-transferase, C-terminal-like; Glutathione S-transferase, N-terminal; Thioredoxin-like fold;
Zm00001d012052_P001	RNA-binding (RRM/RBD/RNP motifs) family protein	1.876	Up	0.026281	chloroplast				IPR000504; IPR012677;	RNA recognition motif domain; Nucleotide-binding alpha-beta plait domain;
Zm00001d040244_P001	pathogenesis-related family protein	1.875	Up	2.1237e-05	cytoplasm				IPR032710;	NTF2-like domain;
Zm00001d012425_P001	Ribosomal protein L17 family protein	1.872	Up	0.00024382	chloroplast	K02879	RP-L17; large subunit ribosomal protein L17	zma03010 Ribosome - Zea mays (maize);
Zm00001d038959_P001	O-acyltransferase WSD1	1.865	Up	0.034358	plasma membrane				IPR009721; IPR023213; IPR004255;	O-acyltransferase WSD1, C-terminal; Chloramphenicol acetyltransferase-like domain; O-acyltransferase, WSD1, N-terminal;
Zm00001d039365_P001	Protein transport protein SEC13 homolog B	1.864	Up	0.0070387	chloroplast	K14004	SEC13; protein transport protein SEC13	zma04141 Protein processing in endoplasmic reticulum - Zea mays (maize); zma03013 RNA transport - Zea mays (maize);	IPR017986; IPR015943;	WD40-repeat-containing domain; WD40/YVTN repeat-like-containing domain;
Zm00001d053891_P001	ILITYHIA	1.862	Up	0.00076193	cytoplasm				IPR011989; IPR016024;	Armadillo-like helical; Armadillo-type fold;
Zm00001d035553_P001	ABC transporter G family member 6	1.861	Up	0.00061782	plasma membrane				IPR003593; IPR003439; IPR027417; IPR013525;	AAA+ ATPase domain; ABC transporter-like; P-loop containing nucleoside triphosphate hydrolase; ABC-2 type transporter;
Zm00001d030544_P001	Glyoxylate reductase	1.859	Up	0.025722	cytoplasm	K15919	HPR2_3; glyoxylate/hydroxypyruvate reductase [EC:1.1.1.79 1.1.1.81]	zma01200 Carbon metabolism - Zea mays (maize); zma01110 Biosynthesis of secondary metabolites - Zea mays (maize); zma01100 Metabolic pathways - Zea mays (maize); zma00260 Glycine, serine and threonine metabolism - Zea mays (maize); zma00630 Glyoxylate and dicarboxylate metabolism - Zea mays (maize);	IPR006139; IPR006140; IPR016040;	D-isomer specific 2-hydroxyacid dehydrogenase, catalytic domain; D-isomer specific 2-hydroxyacid dehydrogenase, NAD-binding domain; NAD(P)-binding domain;
Zm00001d012101_P005	E3 ubiquitin-protein ligase RGLG1	1.852	Up	0.0053364	nucleus	K16280			IPR010734; IPR002035;	Copine; von Willebrand factor, type A;
Zm00001d033624_P010	lipoxygenase4 GN= lox4	1.852	Up	0.033723	cytoplasm	K15718	LOX1_5; linoleate 9S-lipoxygenase [EC:1.13.11.58]	zma00591 Linoleic acid metabolism - Zea mays (maize);	IPR027433; IPR001024; IPR013819;	Lipoxygenase, domain 3; PLAT/LH2 domain; Lipoxygenase, C-terminal;
Zm00001d053228_P003	Acyl carrier protein	1.849	Up	0.000196949	chloroplast				IPR009081;	Phosphopantetheine binding ACP domain;
Zm00001d049103_P001	Cysteine/Histidine-rich C1 domain family protein	1.844	Up	0.0047011	mitochondria				IPR004146;	DC1;
Zm00001d045475_P001	Histone H3	1.842	Up	0.000104805	nucleus	K11253			IPR009072; IPR007125;	Histone-fold; Histone H2A/H2B/H3;
Zm00001d038562_P001	Probable sugar phosphate/phosphate translocator	1.842	Up	0.0061007	vacuolar membrane				IPR004853;	Sugar phosphate transporter domain;
Zm00001d032266_P003	Cytochrome b5	1.838	Up	0.0029584	chloroplast				IPR001199;	Cytochrome b5-like heme/steroid binding domain;
Zm00001d052473_P003	Protein FLX-like 3	1.837	Up	0.044024	nucleus
Zm00001d012599_P001	protein GN=F1F0-ATPase inhibitor protein	1.836	Up	0.0133153	chloroplast
Zm00001d017296_P006	uncharacterized protein	1.833	Up	0.0059584	nucleus				IPR019273;	Lunapark domain;
Zm00001d016770_P004	Exosome complex component RRP45B	1.83	Up	0.00150448	cytoplasm	K03678	RRP45; exosome complex component RRP45	zma03018 RNA degradation - Zea mays (maize);	IPR015847; IPR001247; IPR020568; IPR027408;	Exoribonuclease, phosphorolytic domain 2; Exoribonuclease, phosphorolytic domain 1; Ribosomal protein S5 domain 2-type fold; PNPase/RNase PH domain;
Zm00001d003283_P001	Cytochrome P450 71B10	1.829	Up	0.0146218	chloroplast	K20617
Zm00001d011735_P001	serine acetyltransferase1 GN= sat1	1.826	Up	0.0195184	mitochondria	K00640	cysE; serine O-acetyltransferase [EC:2.3.1.30]	zma01230 Biosynthesis of amino acids - Zea mays (maize); zma01200 Carbon metabolism - Zea mays (maize); zma00920 Sulfur metabolism - Zea mays (maize); zma01110 Biosynthesis of secondary metabolites - Zea mays (maize); zma01100 Metabolic pathways - Zea mays (maize); zma00270 Cysteine and methionine metabolism - Zea mays (maize);	IPR011004; IPR010493;	Trimeric LpxA-like; Serine acetyltransferase, N-terminal;
Zm00001d025165_P003	Nuclear transport factor 2 (NTF2) family protein with RNA binding (RRM-RBD-RNP motifs) domain	1.825	Up	0.044658	cytoplasm				IPR002075; IPR018222; IPR000504; IPR012677; IPR032710;	Nuclear transport factor 2; Nuclear transport factor 2, eukaryote; RNA recognition motif domain; Nucleotide-binding alpha-beta plait domain; NTF2-like domain;
Zm00001d021901_P001	stress-induced protein1 cDNA sequence homologous to thaumatin-like protein GN= sip1	1.822	Up	0.000195598	chloroplast
Zm00001d029708_P001	glutathione transferase30 GN= gst30	1.82	Up	0.00105734	chloroplast	K00799	GST; glutathione S-transferase [EC:2.5.1.18]	zma00480 Glutathione metabolism - Zea mays (maize);	IPR010987; IPR012336; IPR004045;	Glutathione S-transferase, C-terminal-like; Thioredoxin-like fold; Glutathione S-transferase, N-terminal;
Zm00001d045302_P001	"Zea nodulation homolog1 leaf cDNA 6C06E02, similar to alfalfa early nodulation protein ENOD8 GN= znod1"	1.817	Up	0.0088989	plasma membrane				IPR001087; IPR013830;	GDSL lipase/esterase; SGNH hydrolase-type esterase domain;
Zm00001d015204_P001	50S ribosomal protein L3-1 chloroplastic	1.816	Up	0.00067902	chloroplast	K02906	RP-L3; large subunit ribosomal protein L3	zma03010 Ribosome - Zea mays (maize);	IPR009000;	Translation protein, beta-barrel domain;
Zm00001d048890_P003	Acyl-coenzyme A oxidase	1.815	Up	0.0140629	chloroplast	K00232	E1.3.3.6; acyl-CoA oxidase [EC:1.3.3.6]	zma00592 alpha-Linolenic acid metabolism - Zea mays (maize); zma01040 Biosynthesis of unsaturated fatty acids - Zea mays (maize); zma00071 Fatty acid degradation - Zea mays (maize); zma01212 Fatty acid metabolism - Zea mays (maize); zma01110 Biosynthesis of secondary metabolites - Zea mays (maize); zma01100 Metabolic pathways - Zea mays (maize); zma04146 Peroxisome - Zea mays (maize);	IPR009100; IPR006091; IPR002655; IPR009075;	Acyl-CoA dehydrogenase/oxidase, N-terminal and middle domain; Acyl-CoA oxidase/dehydrogenase, central domain; Acyl-CoA oxidase, C-terminal; Acyl-CoA dehydrogenase/oxidase C-terminal;
Zm00001d013787_P004	Secretory carrier-associated membrane protein 3	1.814	Up	0.035916	chloroplast	K19995
Zm00001d042091_P001	Flowering time control protein FY	1.811	Up	0.00083706	peroxisome	K15542	PFS2; polyadenylation factor subunit 2	zma03015 mRNA surveillance pathway - Zea mays (maize);	IPR017986; IPR015943;	WD40-repeat-containing domain; WD40/YVTN repeat-like-containing domain;
Zm00001d023694_P007	2-oxoisovalerate dehydrogenase subunit alpha 2 mitochondrial	1.811	Up	0.0025161	cytoplasm	K00166	BCKDHA; 2-oxoisovalerate dehydrogenase E1 component alpha subunit [EC:1.2.4.4]	zma00640 Propanoate metabolism - Zea mays (maize); zma01110 Biosynthesis of secondary metabolites - Zea mays (maize); zma01100 Metabolic pathways - Zea mays (maize); zma00280 Valine, leucine and isoleucine degradation - Zea mays (maize);	IPR029061; IPR001017;	Thiamin diphosphate-binding fold; Dehydrogenase, E1 component;
Zm00001d017529_P001	copper ion binding	1.811	Up	0.049924	chloroplast
Zm00001d014679_P001	acidic ribosomal protein P3 novel acidic phosphoprotein GN= arpp3	1.807	Up	0.00020352	chloroplast	K02942	RP-LP1; large subunit ribosomal protein LP1	zma03010 Ribosome - Zea mays (maize);
Zm00001d033055_P002	4-coumarate--CoA ligase-like 7	1.807	Up	0.0057806	chloroplast	K01904	4CL; 4-coumarate--CoA ligase [EC:6.2.1.12]	zma00940 Phenylpropanoid biosynthesis - Zea mays (maize); zma01110 Biosynthesis of secondary metabolites - Zea mays (maize); zma01100 Metabolic pathways - Zea mays (maize); zma00130 Ubiquinone and other terpenoid-quinone biosynthesis - Zea mays (maize); zma00360 Phenylalanine metabolism - Zea mays (maize);	IPR025110; IPR000873;	AMP-binding enzyme C-terminal domain; AMP-dependent synthetase/ligase;
Zm00001d028369_P001	hydroxyproline-rich glycoprotein family protein	1.806	Up	1.67041e-05	nucleus				IPR027450;	Alpha-ketoglutarate-dependent dioxygenase AlkB-like;
Zm00001d002261_P003	Peroxisomal (S)-2-hydroxy-acid oxidase GLO1	1.804	Up	0.00133987	chloroplast,mitochondria	K11517	HAO; (S)-2-hydroxy-acid oxidase [EC:1.1.3.15]	zma01200 Carbon metabolism - Zea mays (maize); zma01110 Biosynthesis of secondary metabolites - Zea mays (maize); zma01100 Metabolic pathways - Zea mays (maize); zma04146 Peroxisome - Zea mays (maize); zma00630 Glyoxylate and dicarboxylate metabolism - Zea mays (maize);	IPR013785; IPR000262;	Aldolase-type TIM barrel; FMN-dependent dehydrogenase;
Zm00001d028868_P001	Acetate/butyrate--CoA ligase AAE7 peroxisomal	1.803	Up	0.0172179	chloroplast	K01913	AAE7; acetate---CoA ligase [EC:6.2.1.1]	zma00010 Glycolysis / Gluconeogenesis - Zea mays (maize); zma01200 Carbon metabolism - Zea mays (maize); zma01110 Biosynthesis of secondary metabolites - Zea mays (maize); zma01100 Metabolic pathways - Zea mays (maize); zma00630 Glyoxylate and dicarboxylate metabolism - Zea mays (maize); zma00620 Pyruvate metabolism - Zea mays (maize);	IPR025110; IPR000873;	AMP-binding enzyme C-terminal domain; AMP-dependent synthetase/ligase;
Zm00001d053591_P002	Protein CLP1 homolog	1.802	Up	0.0149184	cytoplasm	K14399	CLP1; polyribonucleotide 5'-hydroxyl-kinase [EC:2.7.1.78]	zma03015 mRNA surveillance pathway - Zea mays (maize);	IPR010655; IPR027417; IPR032324; IPR032319;	Pre-mRNA cleavage complex subunit Clp1; P-loop containing nucleoside triphosphate hydrolase; Clp1, N-terminal beta-sandwich domain; Polyribonucleotide 5'-hydroxyl-kinase Clp1, P-loop domain;
Zm00001d019283_P008	Calreticulin	1.802	Up	6.088e-05	chloroplast	K08057	CALR; calreticulin	zma04145 Phagosome - Zea mays (maize); zma04141 Protein processing in endoplasmic reticulum - Zea mays (maize);	IPR009033; IPR013320;	Calreticulin/calnexin, P domain; Concanavalin A-like lectin/glucanase domain;
Zm00001d019593_P001	Probable carbohydrate esterase	1.802	Up	0.00049767	chloroplast				IPR005181; IPR013830;	Sialate O-acetylesterase domain; SGNH hydrolase-type esterase domain;
Zm00001d038756_P001	Protein LIKE COV 1	1.8	Up	0.00044449	plasma membrane
Zm00001d017380_P001	Membrane steroid-binding protein 1	1.794	Up	0.00027777	chloroplast	K17278			IPR001199;	Cytochrome b5-like heme/steroid binding domain;
Zm00001d022237_P001	"RNA binding protein 1 leaf cDNA csu17, similar to RNA binding proteins GN= rnp1"	1.791	Up	0.0021778	chloroplast	K11294			IPR000504; IPR012677;	RNA recognition motif domain; Nucleotide-binding alpha-beta plait domain;
Zm00001d024839_P001	glutathione S-transferase2 safener-induced GN= gst2	1.79	Up	0.00147685	chloroplast	K00799	GST; glutathione S-transferase [EC:2.5.1.18]	zma00480 Glutathione metabolism - Zea mays (maize);	IPR004046; IPR010987; IPR004045; IPR012336; IPR034347;	Glutathione S-transferase, C-terminal; Glutathione S-transferase, C-terminal-like; Glutathione S-transferase, N-terminal; Thioredoxin-like fold; Glutathione S-transferases Phi, C-terminal;
Zm00001d025922_P001	(+)-neomenthol dehydrogenase	1.789	Up	0.00115607	chloroplast	K15095	E1.1.1.208; (+)-neomenthol dehydrogenase [EC:1.1.1.208]	zma01110 Biosynthesis of secondary metabolites - Zea mays (maize); zma00902 Monoterpenoid biosynthesis - Zea mays (maize);	IPR016040;	NAD(P)-binding domain;
Zm00001d037452_P002	B-cell receptor-associated 31-like	1.789	Up	0.00151559	chloroplast	K14009	BCAP31; B-cell receptor-associated protein 31	zma04141 Protein processing in endoplasmic reticulum - Zea mays (maize);
Zm00001d008218_P005	Coatomer subunit beta	1.788	Up	0.00020254	nucleus	K17301			IPR011710; IPR011989; IPR029446; IPR016024; IPR002553;	Coatomer beta subunit, C-terminal; Armadillo-like helical; Coatomer beta subunit, appendage platform domain; Armadillo-type fold; Clathrin/coatomer adaptor, adaptin-like, N-terminal;
Zm00001d031158_P001	pathogenesis related protein5 GN= prp5	1.786	Up	0.00064062	chloroplast
Zm00001d022286_P005	DExH-box ATP-dependent RNA helicase DExH12	1.785	Up	0.020601	cytoplasm	K12854	SNRNP200; pre-mRNA-splicing helicase BRR2 [EC:3.6.4.13]	zma03040 Spliceosome - Zea mays (maize);	IPR011991; IPR011545; IPR014756; IPR027417; IPR003593; IPR004179; IPR014001; IPR001650; IPR000008;	Winged helix-turn-helix DNA-binding domain; DEAD/DEAH box helicase domain; Immunoglobulin E-set; P-loop containing nucleoside triphosphate hydrolase; AAA+ ATPase domain; Sec63 domain; Helicase superfamily 1/2, ATP-binding domain; Helicase, C-terminal; C2 domain;
Zm00001d005253_P003	V-type proton ATPase subunit G1	1.784	Up	0.0117202	chloroplast	K02152	ATPeV1G; V-type H+-transporting ATPase subunit G	zma04145 Phagosome - Zea mays (maize); zma00190 Oxidative phosphorylation - Zea mays (maize); zma01100 Metabolic pathways - Zea mays (maize);
Zm00001d049405_P001	Autophagy 8e%2C mRNA	1.782	Up	5.5532e-05	cytoplasm	K08341	GABARAP; GABA(A) receptor-associated protein	zma04136 Autophagy - other - Zea mays (maize);	IPR029071;	Ubiquitin-related domain;
Zm00001d029352_P005	SAP domain-containing protein	1.781	Up	0.0060007	nucleus	K12875	ACIN1; apoptotic chromatin condensation inducer in the nucleus	zma03015 mRNA surveillance pathway - Zea mays (maize); zma03040 Spliceosome - Zea mays (maize); zma03013 RNA transport - Zea mays (maize);	IPR003034; IPR034257; IPR000504;	SAP domain; Acinus, RNA recognition motif; RNA recognition motif domain;
Zm00001d005065_P003	BcpLH protein	1.777	Up	0.00021952	chloroplast				IPR014720;	Double-stranded RNA-binding domain;
Zm00001d028024_P001	Nodulin-related protein 1	1.774	Up	0.00026452	nucleus
Zm00001d019241_P002	uncharacterized protein	1.773	Up	0.0178439	extracellular
Zm00001d003524_P001	NAD(P)-linked oxidoreductase superfamily protein	1.772	Up	9.7709e-05	chloroplast	K22374			IPR023210;	NADP-dependent oxidoreductase domain;
Zm00001d044615_P004	"ribosomal protein L10 homolog endosperm cDNA 5C01D03 (uaz198), similar to yeast acidic ribosomal protein GN= rpl10"	1.771	Up	0.00034159	cytoplasm	K14815
Zm00001d011840_P001	uncharacterized protein	1.769	Up	0.00036377	endoplasmic reticulum
Zm00001d042367_P002	Selenium-binding protein 3	1.768	Up	5.6216e-05	cytoplasm	K17285			IPR015943;	WD40/YVTN repeat-like-containing domain;
Zm00001d006049_P001	Protein pob	1.768	Up	0.0110241	chloroplast
Zm00001d004070_P001	RNA-binding protein-like	1.767	Up	0.029723	cytoplasm				IPR002075; IPR018222; IPR000504; IPR012677; IPR032710;	Nuclear transport factor 2; Nuclear transport factor 2, eukaryote; RNA recognition motif domain; Nucleotide-binding alpha-beta plait domain; NTF2-like domain;
Zm00001d038995_P002	Ubiquitin-conjugating enzyme E2 36	1.765	Up	0.0066959	chloroplast	K10580	UBE2N; ubiquitin-conjugating enzyme E2 N [EC:2.3.2.23]	zma04120 Ubiquitin mediated proteolysis - Zea mays (maize);	IPR016135; IPR000608;	Ubiquitin-conjugating enzyme/RWD-like; Ubiquitin-conjugating enzyme E2;
Zm00001d036835_P002	Peroxidase 67	1.765	Up	0.033883	chloroplast	K00430	E1.11.1.7; peroxidase [EC:1.11.1.7]	zma00940 Phenylpropanoid biosynthesis - Zea mays (maize); zma01110 Biosynthesis of secondary metabolites - Zea mays (maize); zma01100 Metabolic pathways - Zea mays (maize);	IPR033905; IPR002016;	Secretory peroxidase; Haem peroxidase, plant/fungal/bacterial;
Zm00001d044086_P001	Nucleic acid-binding OB-fold-like protein	1.764	Up	0.009038	mitochondria	K03111	ssb; single-strand DNA-binding protein	zma03030 DNA replication - Zea mays (maize); zma03440 Homologous recombination - Zea mays (maize); zma03430 Mismatch repair - Zea mays (maize);	IPR012340;	Nucleic acid-binding, OB-fold;
Zm00001d014530_P001	Phenolic glucoside malonyltransferase 1	1.764	Up	0.0072435	chloroplast				IPR023213;	Chloramphenicol acetyltransferase-like domain;
Zm00001d035762_P001	Charged multivesicular body protein 5%3B Putative SNF domain containing family protein	1.764	Up	0.0128163	nucleus	K12198	CHMP5; charged multivesicular body protein 5	zma04144 Endocytosis - Zea mays (maize);
Zm00001d017914_P001	H/ACA ribonucleoprotein complex subunit 2-like protein	1.763	Up	0.0089767	cytoplasm	K11129	NHP2; H/ACA ribonucleoprotein complex subunit 2	zma03008 Ribosome biogenesis in eukaryotes - Zea mays (maize);	IPR029064; IPR004038;	50S ribosomal protein L30e-like; Ribosomal protein L7Ae/L30e/S12e/Gadd45;
Zm00001d028668_P001	phosphoinositide binding	1.756	Up	4.4657e-05	nucleus	K13125			IPR001841; IPR013083; IPR031790; IPR027799;	Zinc finger, RING-type; Zinc finger, RING/FYVE/PHD-type; Nitric oxide synthase-interacting protein, zinc-finger; Replication termination factor 2, RING-finger;
Zm00001d051856_P005	O-fucosyltransferase family protein	1.753	Up	0.048945	cytoplasm	K00472	P4HA; prolyl 4-hydroxylase [EC:1.14.11.2]	zma01100 Metabolic pathways - Zea mays (maize); zma00330 Arginine and proline metabolism - Zea mays (maize);	IPR006620; IPR005123;	Prolyl 4-hydroxylase, alpha subunit; Oxoglutarate/iron-dependent dioxygenase;
Zm00001d014019_P003	Probable eukaryotic translation initiation factor 5-2	1.753	Up	0.0144977	nucleus	K03262	EIF5; translation initiation factor 5	zma03013 RNA transport - Zea mays (maize);	IPR016189; IPR016190; IPR003307; IPR002735; IPR016024; IPR016021;	Translation initiation factor IF2/IF5, N-terminal; Translation initiation factor IF2/IF5, zinc-binding; W2 domain; Translation initiation factor IF2/IF5; Armadillo-type fold; MIF4G-like domain;
Zm00001d036359_P004	Transducin/WD40 repeat-like superfamily protein	1.752	Up	9.7943e-05	nucleus	K14768			IPR012952; IPR017986; IPR015943;	BING4, C-terminal domain; WD40-repeat-containing domain; WD40/YVTN repeat-like-containing domain;
Zm00001d050168_P001	uncharacterized protein	1.751	Up	0.00054068	chloroplast
Zm00001d037264_P001	S-adenosyl-L-methionine-dependent methyltransferases superfamily protein	1.75	Up	0.035163	chloroplast	K03501			IPR029063;	S-adenosyl-L-methionine-dependent methyltransferase;
Zm00001d012819_P001	Protein SRG1	1.749	Up	0.0054197	cytoplasm				IPR027443; IPR005123; IPR026992;	Isopenicillin N synthase-like; Oxoglutarate/iron-dependent dioxygenase; Non-haem dioxygenase N-terminal domain;
Zm00001d020053_P001	Probable protein phosphatase 2C 8	1.748	Up	0.049605	cytoplasm	K17500			IPR001932;	PPM-type phosphatase domain;
Zm00001d005027_P003	protein GN=Expressed protein	1.745	Up	0.0138819	cytoplasm
Zm00001d024028_P002	Anthranilate synthase beta subunit 1 chloroplastic	1.741	Up	0.0138027	cytoplasm,nucleus	K01658	trpG; anthranilate synthase component II [EC:4.1.3.27]	zma01230 Biosynthesis of amino acids - Zea mays (maize); zma01110 Biosynthesis of secondary metabolites - Zea mays (maize); zma01100 Metabolic pathways - Zea mays (maize); zma00400 Phenylalanine, tyrosine and tryptophan biosynthesis - Zea mays (maize);	IPR017926; IPR029062;	Glutamine amidotransferase; Class I glutamine amidotransferase-like;
Zm00001d034365_P001	Syntaxin 121	1.74	Up	0.0167004	cytoplasm	K08486	STX1B_2_3; syntaxin 1B/2/3	zma04130 SNARE interactions in vesicular transport - Zea mays (maize);	IPR000727; IPR010989; IPR006011;	Target SNARE coiled-coil homology domain; SNARE; Syntaxin, N-terminal domain;
Zm00001d003668_P001	Subtilisin-like protease SBT1.9	1.74	Up	0.0138574	extracellular				IPR003137; IPR034197; IPR000209; IPR010259;	PA domain; Cucumisin-like catalytic domain; Peptidase S8/S53 domain; Peptidase S8 propeptide/proteinase inhibitor I9;
Zm00001d029012_P003	Leucine-rich repeat protein kinase family protein	1.74	Up	0.026118	chloroplast				IPR000719; IPR001245; IPR013320; IPR011009;	Protein kinase domain; Serine-threonine/tyrosine-protein kinase catalytic domain; Concanavalin A-like lectin/glucanase domain; Protein kinase-like domain;
Zm00001d042996_P001	2-oxoglutarate (2OG) and Fe(II)-dependent oxygenase superfamily protein	1.739	Up	0.0032165	chloroplast				IPR027443;	Isopenicillin N synthase-like;
Zm00001d009608_P001	3-ketoacyl-CoA synthase	1.738	Up	0.0037751	plasma membrane	K15397	KCS; 3-ketoacyl-CoA synthase [EC:2.3.1.199]	zma00062 Fatty acid elongation - Zea mays (maize); zma01110 Biosynthesis of secondary metabolites - Zea mays (maize); zma01100 Metabolic pathways - Zea mays (maize);	IPR016039; IPR013747; IPR013601;	Thiolase-like; 3-Oxoacyl-[acyl-carrier-protein (ACP)] synthase III, C-terminal; FAE1/Type III polyketide synthase-like protein;
Zm00001d045430_P001	ATP-dependent Clp protease proteolytic subunit	1.738	Up	0.005501	chloroplast	K01358			IPR029045;	ClpP/crotonase-like domain;
Zm00001d021392_P001	Transmembrane 9 superfamily member 9	1.737	Up	0.047497	plasma membrane	K17086			IPR020846;	Major facilitator superfamily domain;
Zm00001d010590_P001	Outer membrane OMP85 family protein	1.736	Up	0.0033423	nucleus,plasma membrane	K07277			IPR000184;	Bacterial surface antigen (D15);
Zm00001d043845_P026	Glutamate synthase 1 [NADH] chloroplastic	1.736	Up	0.0025972	cytoplasm	K00264	GLT1; glutamate synthase (NADH) [EC:1.4.1.14]	zma01230 Biosynthesis of amino acids - Zea mays (maize); zma01110 Biosynthesis of secondary metabolites - Zea mays (maize); zma01100 Metabolic pathways - Zea mays (maize); zma00250 Alanine, aspartate and glutamate metabolism - Zea mays (maize); zma00910 Nitrogen metabolism - Zea mays (maize);	IPR013785; IPR002489; IPR029055; IPR006982; IPR009051; IPR002932; IPR028261; IPR017932; IPR023753;	Aldolase-type TIM barrel; Glutamate synthase, alpha subunit, C-terminal; Nucleophile aminohydrolases, N-terminal; Glutamate synthase, central-N; Alpha-helical ferredoxin; Glutamate synthase domain; Dihydroprymidine dehydrogenase domain II; Glutamine amidotransferase type 2 domain; FAD/NAD(P)-binding domain;
Zm00001d048417_P001	FAD/NAD(P)-binding oxidoreductase family protein	1.735	Up	0.0191403	chloroplast				IPR002938; IPR023753;	FAD-binding domain; FAD/NAD(P)-binding domain;
Zm00001d021197_P001	Alpha-L-fucosidase 1	1.734	Up	0.0117787	chloroplast	K01206	FUCA; alpha-L-fucosidase [EC:3.2.1.51]	zma00511 Other glycan degradation - Zea mays (maize);	IPR017853; IPR008979; IPR013781;	Glycoside hydrolase superfamily; Galactose-binding domain-like; Glycoside hydrolase, catalytic domain;
Zm00001d027976_P002	GLABRA2 expression modulator	1.733	Up	0.0035761	cytoplasm				IPR004182;	GRAM domain;
Zm00001d030012_P002	Probable methyltransferase PMT14	1.732	Up	0.0174039	chloroplast				IPR029063;	S-adenosyl-L-methionine-dependent methyltransferase;
Zm00001d032111_P001	alpha/beta-Hydrolases superfamily protein	1.731	Up	0.0154249	chloroplast				IPR029058; IPR007751;	Alpha/Beta hydrolase fold; Domain of unknown function DUF676, lipase-like;
Zm00001d012674_P005	chorismate mutase1 function largely predicted GN= cmu1	1.73	Up	0.0059187	chloroplast	K01850	E5.4.99.5; chorismate mutase [EC:5.4.99.5]	zma01230 Biosynthesis of amino acids - Zea mays (maize); zma01110 Biosynthesis of secondary metabolites - Zea mays (maize); zma01100 Metabolic pathways - Zea mays (maize); zma00400 Phenylalanine, tyrosine and tryptophan biosynthesis - Zea mays (maize);	IPR020822;	Chorismate mutase, type II;
Zm00001d042961_P001	respiratory burst oxidase1 mutant displays defects in root hair initiation and elongation manifested by a reduced density and length of root hairs. GN= rboh1	1.729	Up	0.036699	nucleus				IPR013121;	Ferric reductase, NAD binding domain;
Zm00001d031129_P001	HSP20-like chaperones superfamily protein	1.728	Up	0.026701	nucleus				IPR002068; IPR008978;	Alpha crystallin/Hsp20 domain; HSP20-like chaperone;
Zm00001d047726_P001	DnaJ protein ERDJ3A	1.728	Up	0.0118211	vacuolar membrane				IPR001623; IPR012336;	DnaJ domain; Thioredoxin-like fold;
Zm00001d020530_P001	hydroxycinnamoyltransferase11 GN= hct11	1.727	Up	0.0028005	cytoplasm	K13065	E2.3.1.133; shikimate O-hydroxycinnamoyltransferase [EC:2.3.1.133]	zma00940 Phenylpropanoid biosynthesis - Zea mays (maize); zma01110 Biosynthesis of secondary metabolites - Zea mays (maize); zma01100 Metabolic pathways - Zea mays (maize); zma00945 Stilbenoid, diarylheptanoid and gingerol biosynthesis - Zea mays (maize); zma00941 Flavonoid biosynthesis - Zea mays (maize);	IPR023213;	Chloramphenicol acetyltransferase-like domain;
Zm00001d047289_P004	Nuclear transport factor 2 (NTF2) family protein with RNA binding (RRM-RBD-RNP motifs) domain	1.726	Up	0.000198777	nucleus				IPR002075; IPR000504; IPR018222; IPR012677; IPR032710;	Nuclear transport factor 2; RNA recognition motif domain; Nuclear transport factor 2, eukaryote; Nucleotide-binding alpha-beta plait domain; NTF2-like domain;
Zm00001d052702_P001	Biotin synthase	1.726	Up	0.00062267	mitochondria	K01012	bioB; biotin synthase [EC:2.8.1.6]	zma00780 Biotin metabolism - Zea mays (maize); zma01100 Metabolic pathways - Zea mays (maize);	IPR010722; IPR013785; IPR006638; IPR007197;	Biotin and thiamin synthesis-associated domain; Aldolase-type TIM barrel; Elongator protein 3/MiaB/NifB; Radical SAM;
Zm00001d014737_P001	Arogenate dehydrogenase 1 chloroplastic	1.725	Up	0.0035001	chloroplast	K15227	TYRAAT; arogenate dehydrogenase (NADP+), plant [EC:1.3.1.78]	zma01230 Biosynthesis of amino acids - Zea mays (maize); zma01110 Biosynthesis of secondary metabolites - Zea mays (maize); zma01100 Metabolic pathways - Zea mays (maize); zma00400 Phenylalanine, tyrosine and tryptophan biosynthesis - Zea mays (maize);	IPR003099; IPR008927; IPR016040;	Prephenate dehydrogenase; 6-phosphogluconate dehydrogenase C-terminal domain-like; NAD(P)-binding domain;
Zm00001d012625_P001	L-type lectin-domain containing receptor kinase IX.1	1.724	Up	0.0060841	plasma membrane				IPR001220; IPR000719; IPR013320; IPR011009;	Legume lectin domain; Protein kinase domain; Concanavalin A-like lectin/glucanase domain; Protein kinase-like domain;
Zm00001d040348_P001	uncharacterized protein	1.724	Up	0.026939	nucleus
Zm00001d035492_P010	IQ-domain 3	1.724	Up	0.0094833	nucleus
Zm00001d046740_P003	Zinc finger CCCH domain-containing protein 52	1.724	Up	0.032775	chloroplast				IPR000571; IPR004087; IPR004088;	Zinc finger, CCCH-type; K Homology domain; K Homology domain, type 1;
Zm00001d014792_P003	shepherd-like1 GN= shpl1	1.724	Up	0.00041861	vacuolar membrane	K09487	HSP90B; heat shock protein 90kDa beta	zma04626 Plant-pathogen interaction - Zea mays (maize); zma04141 Protein processing in endoplasmic reticulum - Zea mays (maize);	IPR020575; IPR020568; IPR003594;	Heat shock protein Hsp90, N-terminal; Ribosomal protein S5 domain 2-type fold; Histidine kinase-like ATPase, C-terminal domain;
Zm00001d043166_P002	UDP-glycosyltransferase 87A1	1.721	Up	2.2687e-06	chloroplast
Zm00001d008498_P001	nucleic acid binding GN=alanine-tRNA ligases	1.72	Up	5.5507e-05	cytoplasm				IPR018163; IPR018164; IPR009000; IPR018165;	Threonyl/alanyl tRNA synthetase, class II-like, putative editing domain; Alanyl-tRNA synthetase, class IIc, N-terminal; Translation protein, beta-barrel domain; Alanyl-tRNA synthetase, class IIc, core domain;
Zm00001d012536_P005	Vacuolar protein sorting-associated protein 36	1.72	Up	0.0160221	cytoplasm	K12190	VPS36; ESCRT-II complex subunit VPS36	zma04144 Endocytosis - Zea mays (maize);	IPR011991;	Winged helix-turn-helix DNA-binding domain;
Zm00001d036801_P001	Phosphoribosylanthranilate transferase isoform 1%3B Phosphoribosylanthranilate transferase isoform 2%3B Phosphoribosylanthranilate transferase isoform 3	1.719	Up	0.0097637	plasma membrane				IPR000008; IPR013583;	C2 domain; Phosphoribosyltransferase C-terminal;
Zm00001d005461_P001	Protein transport protein SEC13 homolog B	1.718	Up	0.02856	cytoplasm	K14004	SEC13; protein transport protein SEC13	zma04141 Protein processing in endoplasmic reticulum - Zea mays (maize); zma03013 RNA transport - Zea mays (maize);	IPR017986; IPR015943;	WD40-repeat-containing domain; WD40/YVTN repeat-like-containing domain;
Zm00001d030231_P002	uncharacterized protein	1.717	Up	0.047316	nucleus				IPR007527; IPR018289; IPR006564; IPR000270; IPR004332;	Zinc finger, SWIM-type; MULE transposase domain; Zinc finger, PMZ-type; PB1 domain; Transposase, MuDR, plant;
Zm00001d053028_P007	Protein TPLATE	1.715	Up	0.00146072	chloroplast				IPR016024;	Armadillo-type fold;
Zm00001d028232_P008	Superoxide dismutase [Cu-Zn]	1.715	Up	0.020482	cytoskeleton	K04565	SOD1; superoxide dismutase, Cu-Zn family [EC:1.15.1.1]	zma04146 Peroxisome - Zea mays (maize);	IPR001424;	Superoxide dismutase, copper/zinc binding domain;
Zm00001d027648_P001	Tankyrase 1	1.714	Up	0.036501	mitochondria				IPR020683;	Ankyrin repeat-containing domain;
Zm00001d006871_P002	40S ribosomal protein Sa-1	1.714	Up	0.0110848	cytoplasm	K02998	RP-SAe; small subunit ribosomal protein SAe	zma03010 Ribosome - Zea mays (maize);	IPR023591;	Ribosomal protein S2, flavodoxin-like domain;
Zm00001d007772_P004	RNA-binding (RRM/RBD/RNP motifs) family protein	1.713	Up	0.0086991	nucleus	K14411	MSI; RNA-binding protein Musashi	zma03015 mRNA surveillance pathway - Zea mays (maize);	IPR034131; IPR000504; IPR012677;	DAZ-associated protein 1, RNA recognition motif 2; RNA recognition motif domain; Nucleotide-binding alpha-beta plait domain;
Zm00001d002693_P001	U-box domain-containing protein 33	1.712	Up	0.00058137	chloroplast				IPR003613; IPR000719; IPR013083; IPR001245; IPR013320; IPR011009;	U box domain; Protein kinase domain; Zinc finger, RING/FYVE/PHD-type; Serine-threonine/tyrosine-protein kinase catalytic domain; Concanavalin A-like lectin/glucanase domain; Protein kinase-like domain;
Zm00001d031489_P005	UvrB/uvrC motif family protein	1.711	Up	0.038516	nucleus				IPR001943;	UVR domain;
Zm00001d003672_P002	40S ribosomal protein S10-1	1.709	Up	0.042303	nucleus	K02947	RP-S10e; small subunit ribosomal protein S10e	zma03010 Ribosome - Zea mays (maize);	IPR005326;	Plectin/S10, N-terminal;
Zm00001d037125_P006	Calcium-binding EF hand family protein	1.707	Up	0.0065156	nucleus				IPR000261; IPR011992; IPR002048;	EH domain; EF-hand domain pair; EF-hand domain;
Zm00001d025753_P001	chitinase B1 cDNA sequence corresponds to protein sequence of maize chitinase B GN= ctb1	1.707	Up	0.0065171	extracellular	K01183	E3.2.1.14; chitinase [EC:3.2.1.14]	zma00520 Amino sugar and nucleotide sugar metabolism - Zea mays (maize); zma01100 Metabolic pathways - Zea mays (maize);	IPR023346; IPR000726; IPR001002;	Lysozyme-like domain; Glycoside hydrolase, family 19, catalytic; Chitin-binding, type 1;
Zm00001d018344_P001	receptor like protein 57	1.702	Up	0.024537	extracellular				IPR032675;	Leucine-rich repeat domain, L domain-like;
Zm00001d042114_P001	uncharacterized protein	1.7	Up	0.04204	chloroplast				IPR028144;	Cysteine-rich transmembrane CYSTM domain;
Zm00001d029853_P001	Proline oxidase	1.697	Up	0.0054232	chloroplast	K00318	PRODH; proline dehydrogenase [EC:1.5.-.-]	zma01110 Biosynthesis of secondary metabolites - Zea mays (maize); zma01100 Metabolic pathways - Zea mays (maize); zma00330 Arginine and proline metabolism - Zea mays (maize);	IPR002872; IPR029041;	Proline dehydrogenase domain; FAD-linked oxidoreductase-like;
Zm00001d039366_P001	Protein trichome birefringence-like 39	1.696	Up	0.040161	chloroplast				IPR025846;	PMR5 N-terminal domain;
Zm00001d047522_P003	Vacuolar-sorting receptor 1	1.693	Up	0.00055506	vacuolar membrane				IPR003137; IPR001881; IPR012336;	PA domain; EGF-like calcium-binding domain; Thioredoxin-like fold;
[truncated: 845 more rows]

## Sheet: 2dpi vs 1dpi 
Protein accession	Protein description	2 dpi/1 dpi Ratio	Regulated Type	2 dpi/1 dpi P value	Subcellular localization	KEGG KO No.	KEGG Gene	KEGG pathway	IPR ID	Domain description
[truncated: 533 more rows]
