# Supplementary material for: Comparative Proteomic Analysis of the Defense Response to Gibberella Stalk Rot in Maize and Reveals That ZmWRKY83 Is Involved in Plant Disease Resistance
Source: Front Plant Sci. 2021 Aug 13;12:694973. doi: 10.3389/fpls.2021.694973 (PMC8417113; doi:10.3389/fpls.2021.694973)
Supplement: Supplementary Table 3 — Primers sequences used for qRT-PCR amplification of selected genes for validation. [file Table_3.XLSX]

## Sheet: primers
Gene ID	Primer	Sequence (5’ - 3’)
Zm00001d041871	Zm00001d041871-F	CACTACCGCATCGGGAAGAA
	Zm00001d041871-R	TCCCGCTGTTGTCAGTATCG
Zm00001d004022	Zm00001d004022-F	CCAATGGCGCAACCTGAAAT
	Zm00001d004022-R	TGTCTTCGTGGTGCAGACTC
Zm00001d006008	Zm00001d006008-F	TCGCCGATAGAGTTGTCGTG
	Zm00001d006008-R	GACCAGATCCTTGAGGCGAC
Zm00001d052855	Zm00001d052855-F	GCAGGCCTTGGACAAGATCA
	Zm00001d052855-R	ACGACAACCCTCTCTGCAAC
Zm00001d036401	Zm00001d036401-F	ACTTGGCTAACCCACCGAAG
	Zm00001d036401-R	AGTGTCCCCTTCACCCAGAA
Zm00001d020898	Zm00001d020898-F	CCCAGCCAAGAGTCATCGTT
	Zm00001d020898-R	TGTCGATGATGGAGAGCGTG
Zm00001d052653	Zm00001d052653-F	CAGTGCATCGGGATGAAGGA
	Zm00001d052653-R	GGAGAAAGGCTGTTGACGGA
Zm00001d002287	Zm00001d002287-F	TCCTGGGCAACATATCGACG
	Zm00001d002287-R	AGGTCGTTGTTGAAGACGCT
Zm00001d038023	Zm00001d038023-F	CAGAGGTTCGACTGGAAGCA
	Zm00001d038023-R	CCAGTTGTACCCGTCCTCAA
Zm00001d024903	Zm00001d024903-F	TGAAGCACTTCTCGGTGGAG
	Zm00001d024903-R	CTTGACCAGGTTCTTGCGGA
Zm00001d052809	Zm00001d052809-F	GGTTGGTCCGCCAATATGGA
	Zm00001d052809-R	AGGGCAATCGCCATCATCTC
Zm00001d014792	Zm00001d014792-F	TGTCCACCGACTCTGAGGTT
	Zm00001d014792-R	AAACACAGGGGTCAGAAGCAA
Zm00001d005708	Zm00001d005708-F	TTCCAGGTACACCATGCGTC
	Zm00001d005708-R	CTACACGTTTCTCCTCCGCA
Zm00001d029028	Zm00001d029028-F	GTGTTCGACCTCTTCGACCG
	Zm00001d029028-R	CCTCATCGAACACCCGGAAC
Zm00001d009708	Zm00001d009708-F	CACTCCGTCAACCTCGTCAT
	Zm00001d009708-R	TGCCGACAAGATCCCTGAAC
Zm00001d021835	Zm00001d021835-F	TCTCCAAGAAGAAGCTCCGC
	Zm00001d021835-R	CGACCTCAACGATAGTGCGT
Zm00001d013030	Zm00001d013030-F	GCGATACTGTCCGAGCAAGA
	Zm00001d013030-R	TGGTTTCCCAGCTTACGGAG
Zm00001d010649	Zm00001d010649-F	AGTGCTTCGACGTGTTCGAC
	Zm00001d010649-R	CACTTCTTGTCCCTGAGCAGT
Zm00001d024755	Zm00001d024755-F	GGCTCAATACCCAGGACACC
	Zm00001d024755-R	GCGGCACTCCTACCATTTCT
Zm00001d010919	Zm00001d010919-F	GTATGCAATGACCGGGCAAC
	Zm00001d010919-R	TCGCAACAGCTTTAGGAGGG
Zm00001d009296	Zm00001d009296-F	CAGCAGTTCGCGGAGAAGTA
	Zm00001d009296-R	TAAAGACGCCACGGTTGTCG
Zm00001d019060	Zm00001d019060-F	TGCTGGACACCGTGAACTAC
	Zm00001d019060-R	ATGATCTTGTCCTCCGGGGT
Zm00001d043727	Zm00001d043727-F	AGGGTGTTGACGTTCTGAGC
	Zm00001d043727-R	GGCTTTCCTTTGAAGTGGCG
Zm00001d017139	Zm00001d017139-F	ATCCCTTGCACTTGGGTGTT
	Zm00001d017139-R	ATTTGAAGGTTTGCGGCCTG
Zm00001d040163	Zm00001d040163-F	GGATGGCCCAAAGCCTATCT
	Zm00001d040163-R	GGCTTCTCTTCGCAATCAGC
Zm00001d038193	Zm00001d038193-F	CTTGGCTGTCTCTTCCTCTTCG
	Zm00001d038193-R	ATACTTGGACTCGTGGCCGAT
Zm00001d033896	Zm00001d033896-F	TTCGGGCACAAGAAGGAGAC
	Zm00001d033896-R	CTCTTGTTGACGGTGGGGTT
Zm00001d043182	Zm00001d043182-F	CCAATGTTCCAGGTGTCCCA
	Zm00001d043182-R	GCTATGCAGCCAGCAAACTG
Zm00001d021929	Zm00001d021929-F	AAGGCATACATGGAGGAGCG
	Zm00001d021929-R	TGGTGTGCACCATCTCGAC
Zm00001d021709	Zm00001d021709-F	AGCACAGAGGAAGCTACTGG
	Zm00001d021709-R	TCACGTACTTCACGTCAGCG
Zm00001d041082	Zm00001d041082-F	GTGCGTGGATTGGATCTTGC
	Zm00001d041082-R	CCGGGGAAGATGACGTTGAA
Zm00001d029648	Zm00001d029648-F	ACCTTTCTTCCCTTGCGGTC
	Zm00001d029648-R	TCAGCATTGCCCTGATCTCG
Zm00001d046342	Zm00001d046342-F	TCGTTGCTATGAGCGACCAG
	Zm00001d046342-R	CGGAACTTACGTCCTCGCTT
ZmActin	Zm00001d010159-F	GATGATGCGCCAAGAGCTG
	Zm00001d010159-R	GCCTCATCACCTACGTAGGCAT
ZmWRKY83(CDS)	ZmWRKY83(CDS)-F	CACCATGGCGTCCTCGACGGGGA
	ZmWRKY83(CDS)-R	CTAGCAGAGGAGCGAGTCGACGAAC
18s (Arabidopsis)	18S-F	CGGCTACCACATCCAAGGAA
	18S-R	TGTCACTACCTCCCCGTGTCA
