# Supplementary material for: Comparative Proteomic Analysis of the Defense Response to Gibberella Stalk Rot in Maize and Reveals That ZmWRKY83 Is Involved in Plant Disease Resistance
Source: Front Plant Sci. 2021 Aug 13;12:694973. doi: 10.3389/fpls.2021.694973 (PMC8417113; doi:10.3389/fpls.2021.694973)
Supplement: Supplementary Table 4 — Quantitative real-time PCR (qRT-PCR) results of the proteins enriched in plant-pathogen interaction pathway, terpenoid backbone, and diterpenoid biosynthesis pathway in B73 and Mo17. Data represent the mean ± SD. [file Table_4.XLSX]

## Sheet: Sheet1
Gene ID	qRT-PCR (B73)		qRT-PCR (Mo17)
	1 dpi / 0 dpi	2 dpi / 0 dpi	1 dpi / 0 dpi	2 dpi / 0 dpi
Zm00001d041871	1.36±0.21	2.94±0.29	1.58±0.16	1.06±0.11
Zm00001d004022	1.34±0.12	3.15±0.29	1.65±0.25	1.77±0.28
Zm00001d006008	1.64±0.15	1.4±0.11	1.56±0.05	1.23±0.08
Zm00001d052855	1.41±0.13	1.83±0.35	1.67±0.26	1.59±0.29
Zm00001d036401	2.46±0.08	4.98±0.29	4.95±0.55	2.13±0.29
Zm00001d020898	1.96±0.08	2.18±0.16	1.85±0.21	1.83±0.24
Zm00001d052653	5.83±0.24	13.73±0.69	3.51±0.07	2.51±0.10
Zm00001d002287	1.53±0.13	0.47±0.04	1.52±0.09	0.58±0.04
Zm00001d038023	1.36±0.14	4.96±0.54	2.62±0.09	2.12±0.12
Zm00001d024903	0.2±0.03	0.52±0.1	13.00±1.56	0.38±0.04
Zm00001d052809	1.18±0.06	1.99±0.26	1.15±0.19	1.14±0.22
Zm00001d014792	1.33±0.09	2.64±0.15	3.27±0.16	1.12±0.11
Zm00001d005708	1.91±0.34	1.67±0.13	1.02±0.15	1.20±0.18
Zm00001d029028	1.6±0.08	8.89±1.02	0.97±0.21	2.57±0.24
Zm00001d009708	1.22±0.15	1.81±0.14	1.54±0.08	1.30±0.11
Zm00001d021835	2.1±0.26	4.02±0.21	0.53±0.05	1.55±0.08
Zm00001d013030	1.24±0.14	1.58±0.22	1.00±0.27	1.30±0.30
Zm00001d010649	2.51±0.11	7.52±0.37	1.91±0.24	1.95±0.27
Zm00001d024755	1.7±0.08	2.08±0.21	1.59±0.21	1.64±0.24
Zm00001d010919	1.55±0.11	3.01±0.34	1.06±0.24	1.64±0.27
Zm00001d009296	4.90 ±0.51	180.98±9.62	19.35±2.69	6.91±1.01
Zm00001d019060	7.95 ±0.57	77.75±5.22	29.43±2.25	1.92±0.16
Zm00001d043727	2.15 ±0.15	16.45±1.32	7.38±0.98	1.66±0.24
Zm00001d017139	3.08 ±0.21	29.11±2.45	4.41±0.34	2.28±0.37
Zm00001d040163	2.62 ±0.17	26.04±1.96	3.78±0.36	1.77±0.39
Zm00001d038193	0.69 ±0.08	0.88±0.03	1.18±0.21	0.80±0.24
Zm00001d033896	1.29 ±0.09	8.91±0.39	2.54±0.22	2.84±0.25
Zm00001d043182	1.41 ±0.11	7.38±1.21	2.42±0.24	1.48±0.27
Zm00001d021929	26.94 ±1.17	614.12±10.59	1.92±0.07	6.00±0.55
Zm00001d021709	1.31 ±0.09	2.02±0.39	1.06±0.22	1.69±0.25
Zm00001d041082	15.44 ±1.01	133.7±5.97	113.47±5.96	1.40±0.12
Zm00001d029648	21.44 ±1.29	423.21±10.38	213.68±5.27	2.91±0.69
Zm00001d046342	5.49 ±0.63	57.13±2.11	14.74±1.63	1.70±0.15
