# Supplementary material for: Comparative Proteomic Analysis of the Defense Response to Gibberella Stalk Rot in Maize and Reveals That ZmWRKY83 Is Involved in Plant Disease Resistance
Source: Front Plant Sci. 2021 Aug 13;12:694973. doi: 10.3389/fpls.2021.694973 (PMC8417113; doi:10.3389/fpls.2021.694973)
Supplement: Supplementary Table 5 — Quantitative real-time PCR results of the proteins enriched in plant-pathogen interaction pathway, terpenoid backbone, and diterpenoid biosynthesis pathway in 0, 1, 2, and 3 dpi in maize stem with F. graminearum infection. Data represent the mean ± SD. [file Table_5.XLSX]

## Sheet: Sheet1
Gene ID	qRT-PCR
	1 dpi / 0 dpi	2 dpi / 0 dpi	3 dpi / 0 dpi
Zm00001d041871	1.36±0.21	2.94±0.29	2.71 ±0.39
Zm00001d004022	1.34±0.12	3.15±0.29	2.07 ±0.3
Zm00001d006008	1.64±0.15	1.4±0.11	1.16 ±0.21
Zm00001d052855	1.41±0.13	1.83±0.35	1.69 ±0.38
Zm00001d036401	2.46±0.08	4.98±0.29	5.34 ±0.69
Zm00001d020898	1.96±0.08	2.18±0.16	1.64 ±0.15
Zm00001d052653	5.83±0.24	13.73±0.69	5.96 ±0.96
Zm00001d002287	1.53±0.13	0.47±0.04	0.66 ±0.14
Zm00001d038023	1.36±0.14	4.96±0.54	2.01 ±0.35
Zm00001d024903	0.2±0.03	0.52±0.1	2.33 ±0.52
Zm00001d052809	1.18±0.06	1.99±0.26	1.88 ±0.36
Zm00001d014792	1.33±0.09	2.64±0.15	2.49 ±0.25
Zm00001d005708	1.91±0.34	1.67±0.13	1.37 ±0.18
Zm00001d029028	1.6±0.08	8.89±1.02	3.28 ±0.65
Zm00001d009708	1.22±0.15	1.81±0.14	1.34 ±0.21
Zm00001d021835	2.1±0.26	4.02±0.21	1.70 ±0.16
Zm00001d013030	1.24±0.14	1.58±0.22	0.89 ±0.08
Zm00001d010649	2.51±0.11	7.52±0.37	4.54 ±0.33
Zm00001d024755	1.7±0.08	2.08±0.21	1.62 ±0.22
Zm00001d010919	1.55±0.11	3.01±0.34	1.79 ±0.24
Zm00001d009296	4.90 ±0.51	180.98±9.62	20.19 ±1.21
Zm00001d019060	7.95 ±0.57	77.75±5.22	39.53 ±3.54
Zm00001d043727	2.15 ±0.15	16.45±1.32	10.18 ±1.03
Zm00001d017139	3.08 ±0.21	29.11±2.45	13.28 ±1.58
Zm00001d040163	2.62 ±0.17	26.04±1.96	15.46 ±2.06
Zm00001d038193	0.69 ±0.08	0.88±0.03	1.02 ±0.09
Zm00001d033896	1.29 ±0.09	8.91±0.39	5.56 ±0.26
Zm00001d043182	1.41 ±0.11	7.38±1.21	4.32 ±0.78
Zm00001d021929	26.94 ±1.17	614.12±10.59	323.97 ±10.69
Zm00001d021709	1.31 ±0.09	2.02±0.39	1.83 ±0.2
Zm00001d041082	15.44 ±1.01	133.7±5.97	71.69 ±4.28
Zm00001d029648	21.44 ±1.29	423.21±10.38	226.28 ±10.48
Zm00001d046342	5.49 ±0.63	57.13±2.11	32.14 ±2.59
